# Supplementary material for: Towards the enantioselective synthesis of (−)-euonyminol – preparation of a fully functionalised lower-rim model
Source: Royal Society of Chemistry journal article supplement (doi:10.1039/c3ob27187k), 2013-01-01

## Supporting Information — Spectra

**Manuscript:** Towards the Enantioselective Synthesis of (-)-Euonyminol –  
Preparation of a Fully Functionalised Lower-rim Model

**Authors:** Matthew J. Webber, Sarah A. Warren, Damian M. Grainger,  
Matthew Weston, Stacy Clark, Steven J. Woodhead, Lyn Powell,  
Stephen Stokes, Alexander Alanine, Jeffrey P. Stonehouse,  
Christopher S. Frampton, Andrew J.P. White, and Alan C. Spivey

### General Procedures:

All reactions were performed under anhydrous conditions and an atmosphere of nitrogen in oven-dried glassware. Yields refer to chromatographically and spectroscopically ( $^1\text{H}$  NMR) homogenous materials. Reagents were used as obtained from commercial sources or purified according to known procedures. Flash chromatography was carried out using Merck Kiesegel 60 F<sub>254</sub> (230-400 mesh) silica gel. Only distilled solvents were used as eluents. Thin layer chromatography (TLC) was performed on Merck DC-Alufolien or glass plates pre-coated with silica gel 60 F<sub>254</sub> which were visualised either by quenching of ultraviolet fluorescence ( $\lambda_{\text{max}} = 254$  nm) or by charring with 10%  $\text{KMnO}_4$  in 0.1 M NaOH. All reaction solvents were distilled before use and stored over activated 4 Å molecular sieves, unless otherwise indicated. Anhydrous  $\text{CH}_2\text{Cl}_2$  was obtained by refluxing over calcium hydride. Petrol refers to the fraction of light petroleum boiling between 40-60°C. High Resolution Mass Spectrometry (HRMS) measurements are valid to  $\pm 5$  ppm. Optical rotation measurements are not reported for synthetic compounds derived from allylic alcohol (-)-**3** as the material used for this development work was of variable ee (see footnote to procedure for lactate ester **27**).

Cyanohydrin 6 – <sup>1</sup>H NMR (400 MHz)

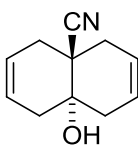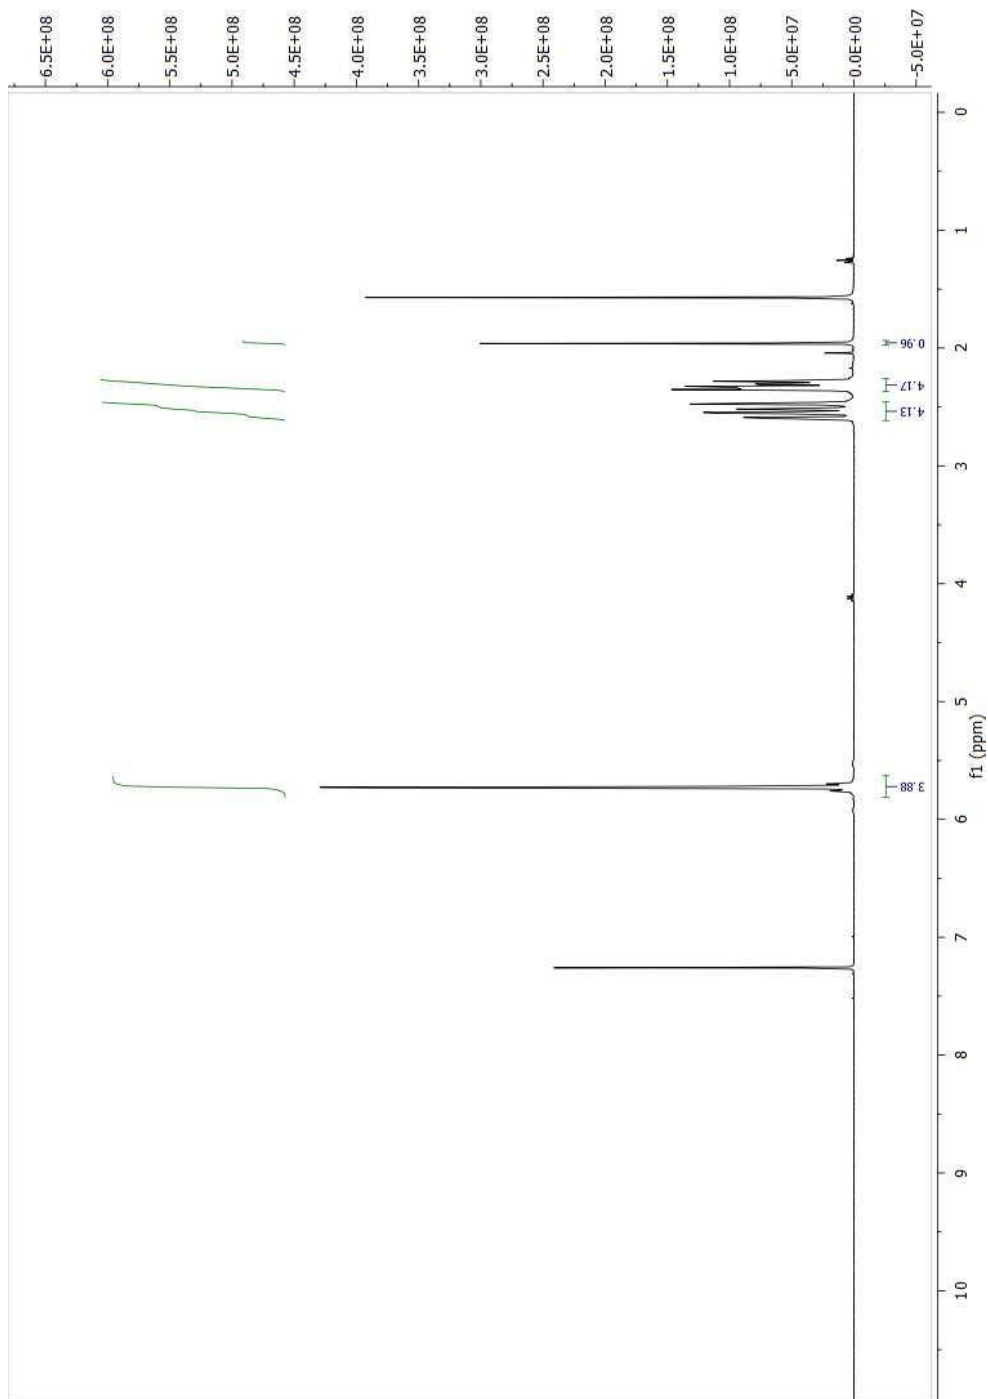

Cyanohydrin 6 – <sup>13</sup>C NMR (63 MHz)

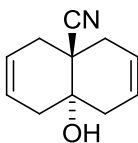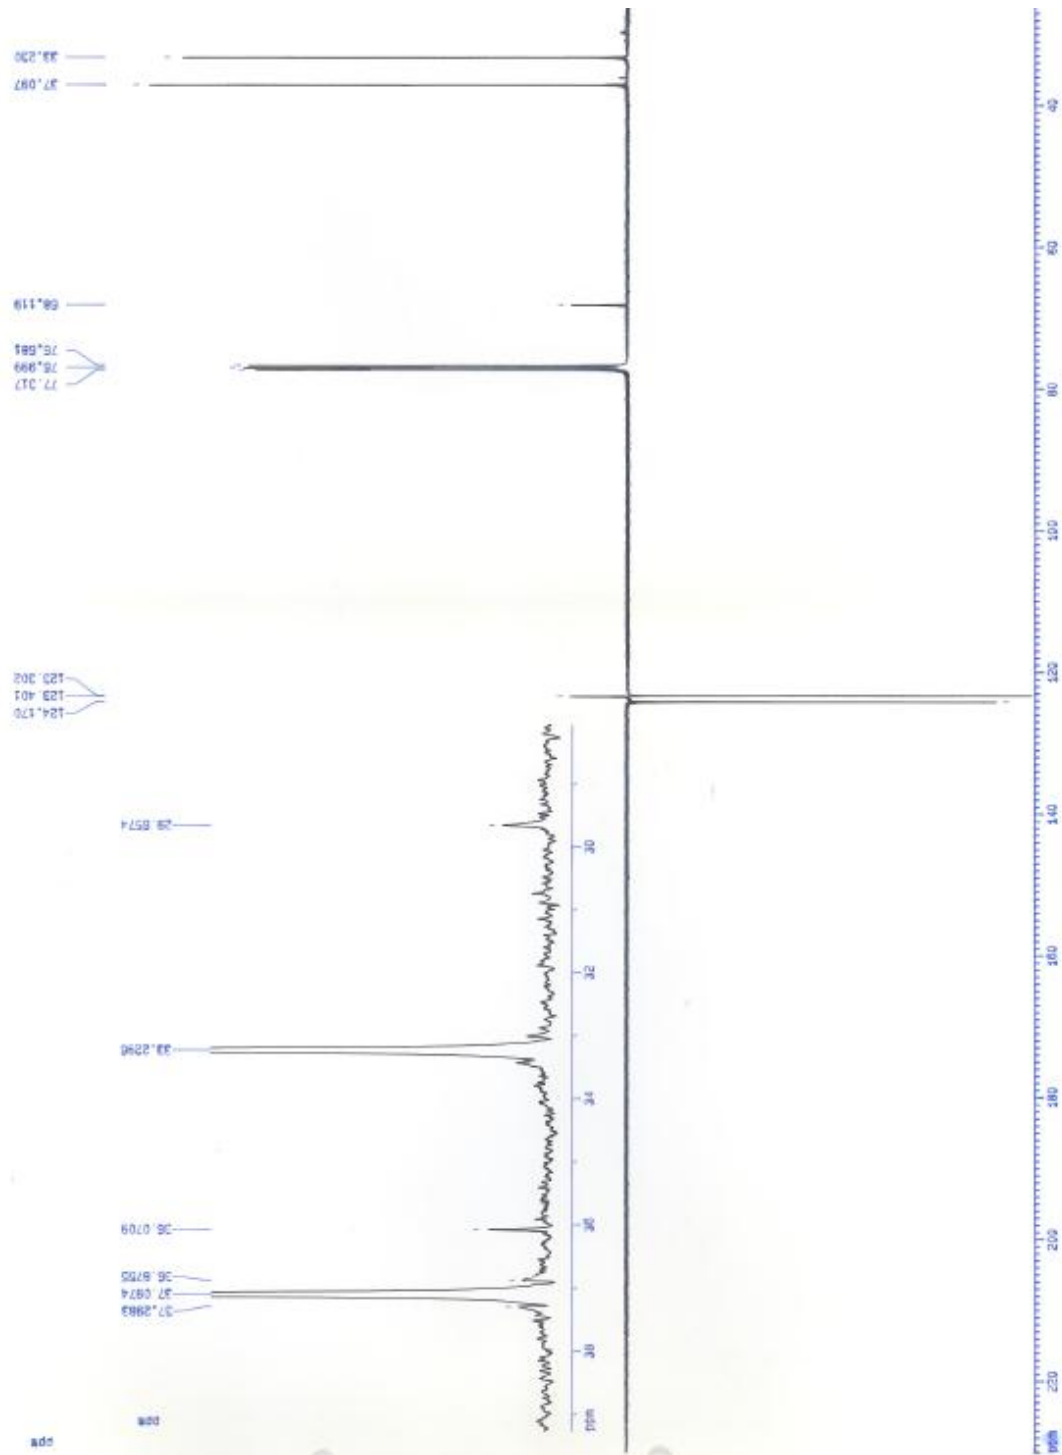

**bis-Epoxyde 7 – <sup>1</sup>H NMR (400 MHz)**

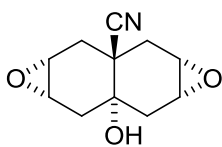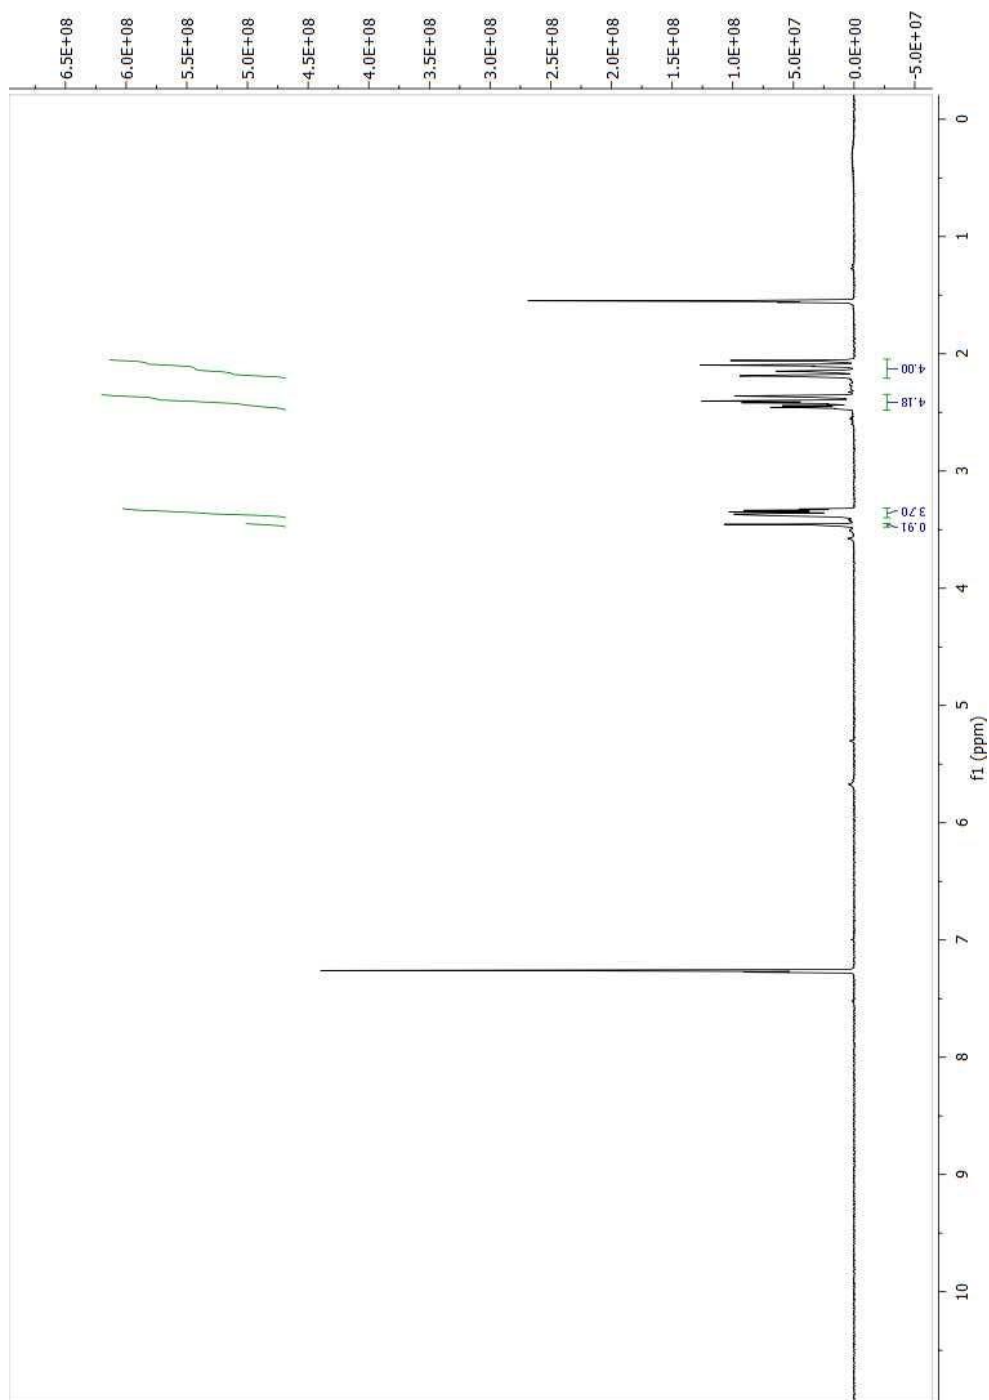

**bis-Epoxyde 7 – <sup>13</sup>C NMR (100 MHz)**

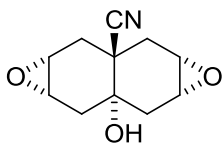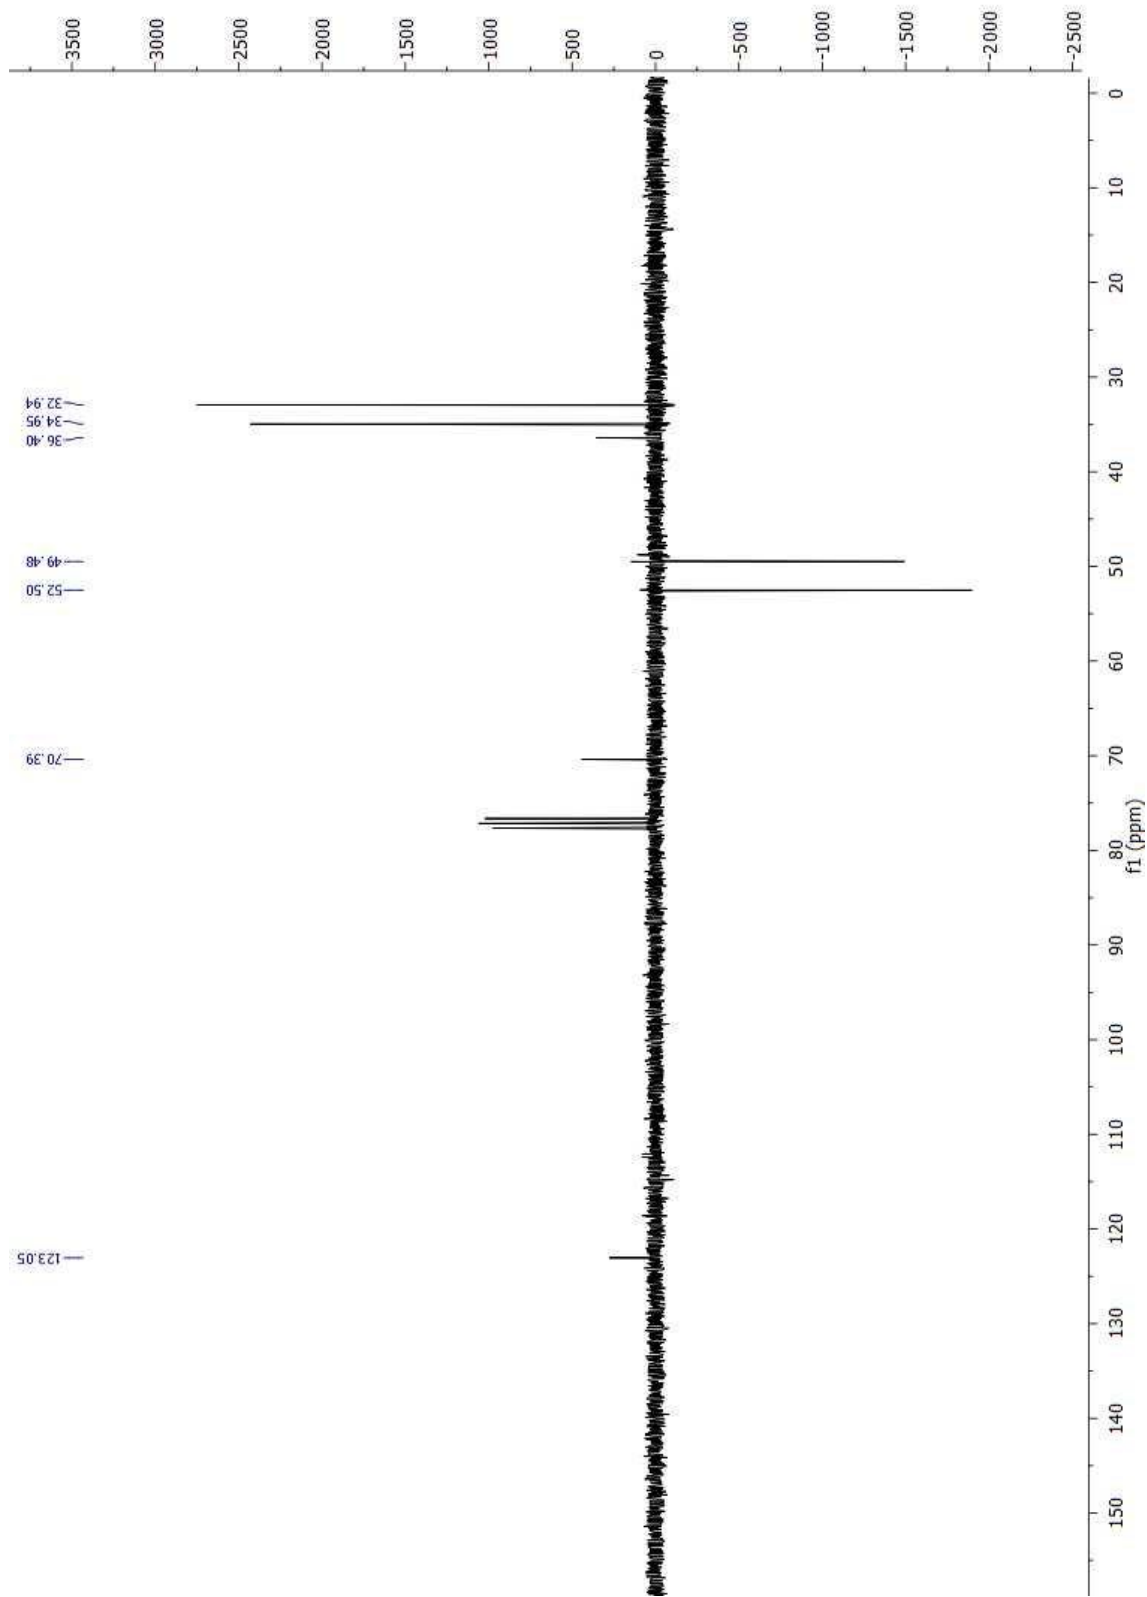

Triol 8 – <sup>1</sup>H NMR (400 MHz)

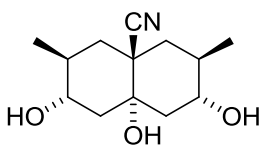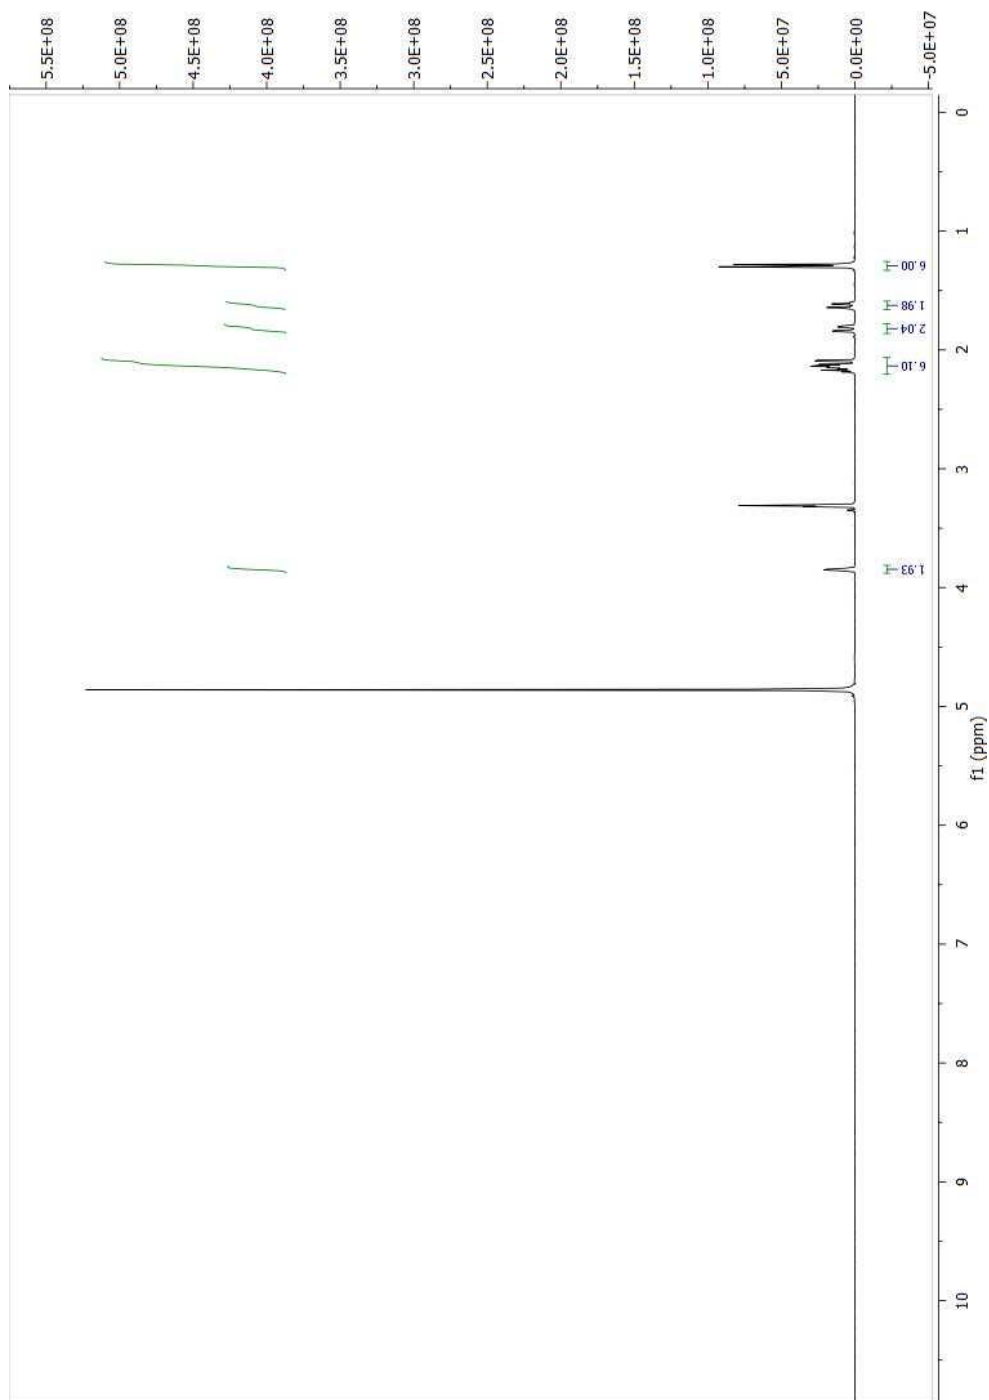

Triol 8 – <sup>13</sup>C NMR (100 MHz)

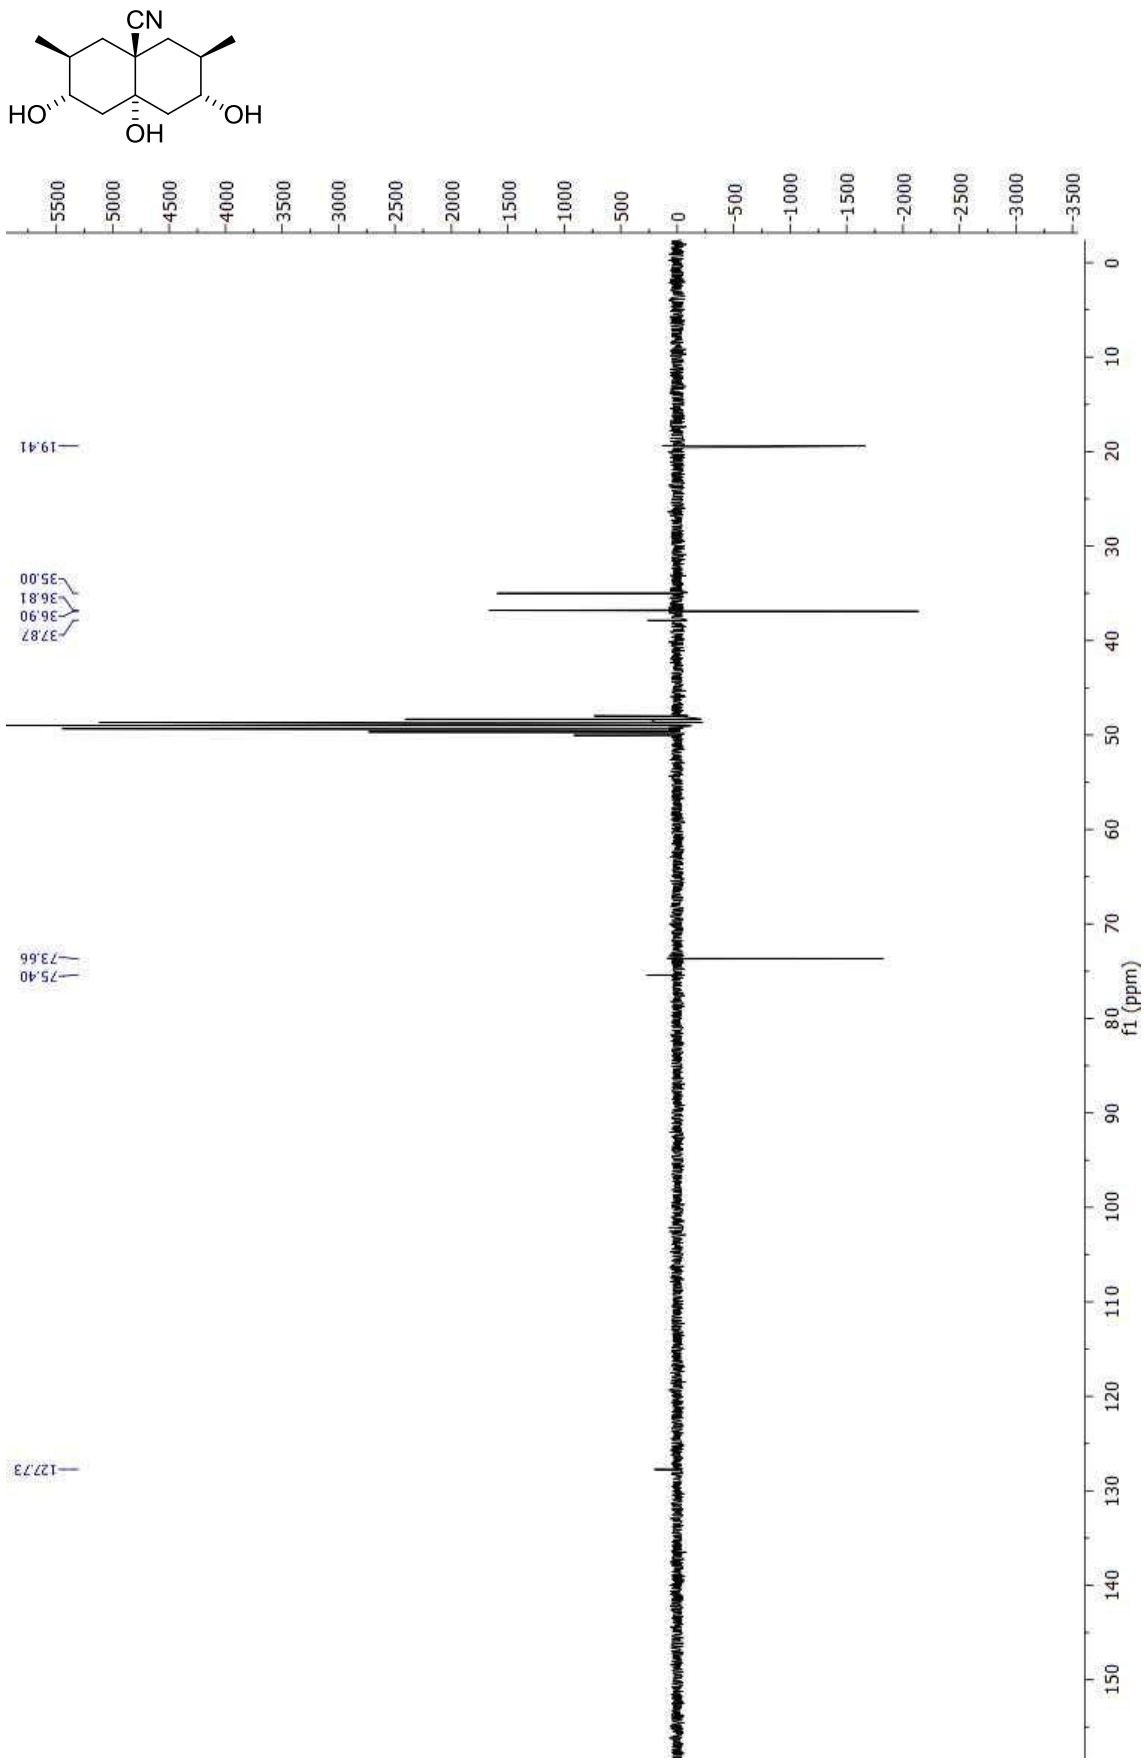

**bis-Mesylate 9 – <sup>1</sup>H NMR (400 MHz)**

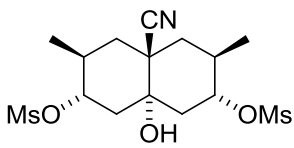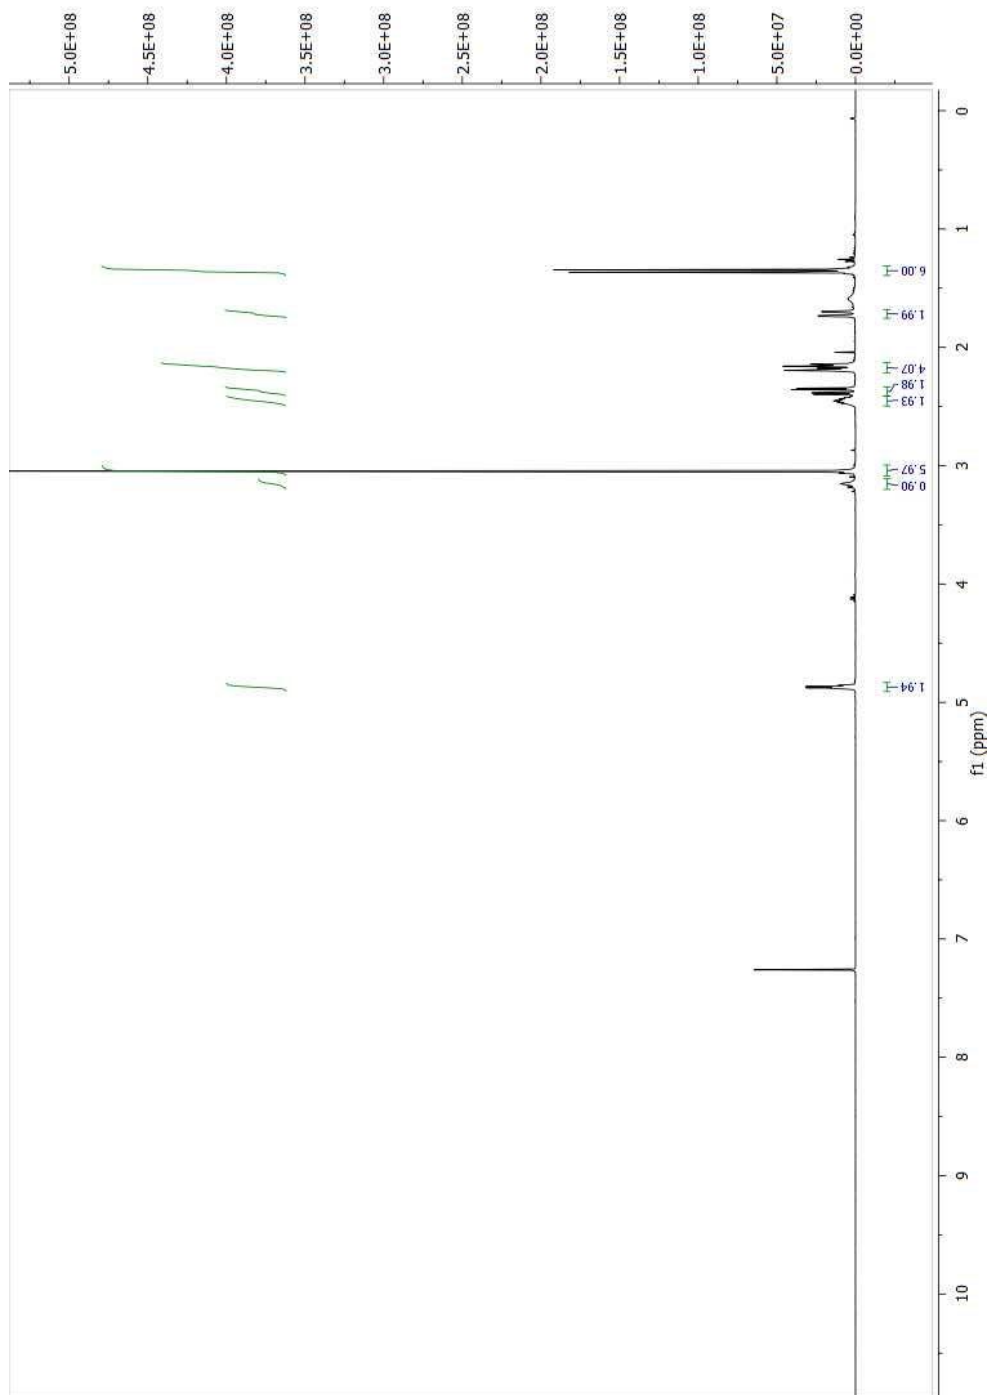



**bis-Mesylate 9 – <sup>13</sup>C NMR (100 MHz)**

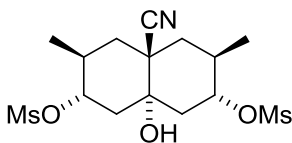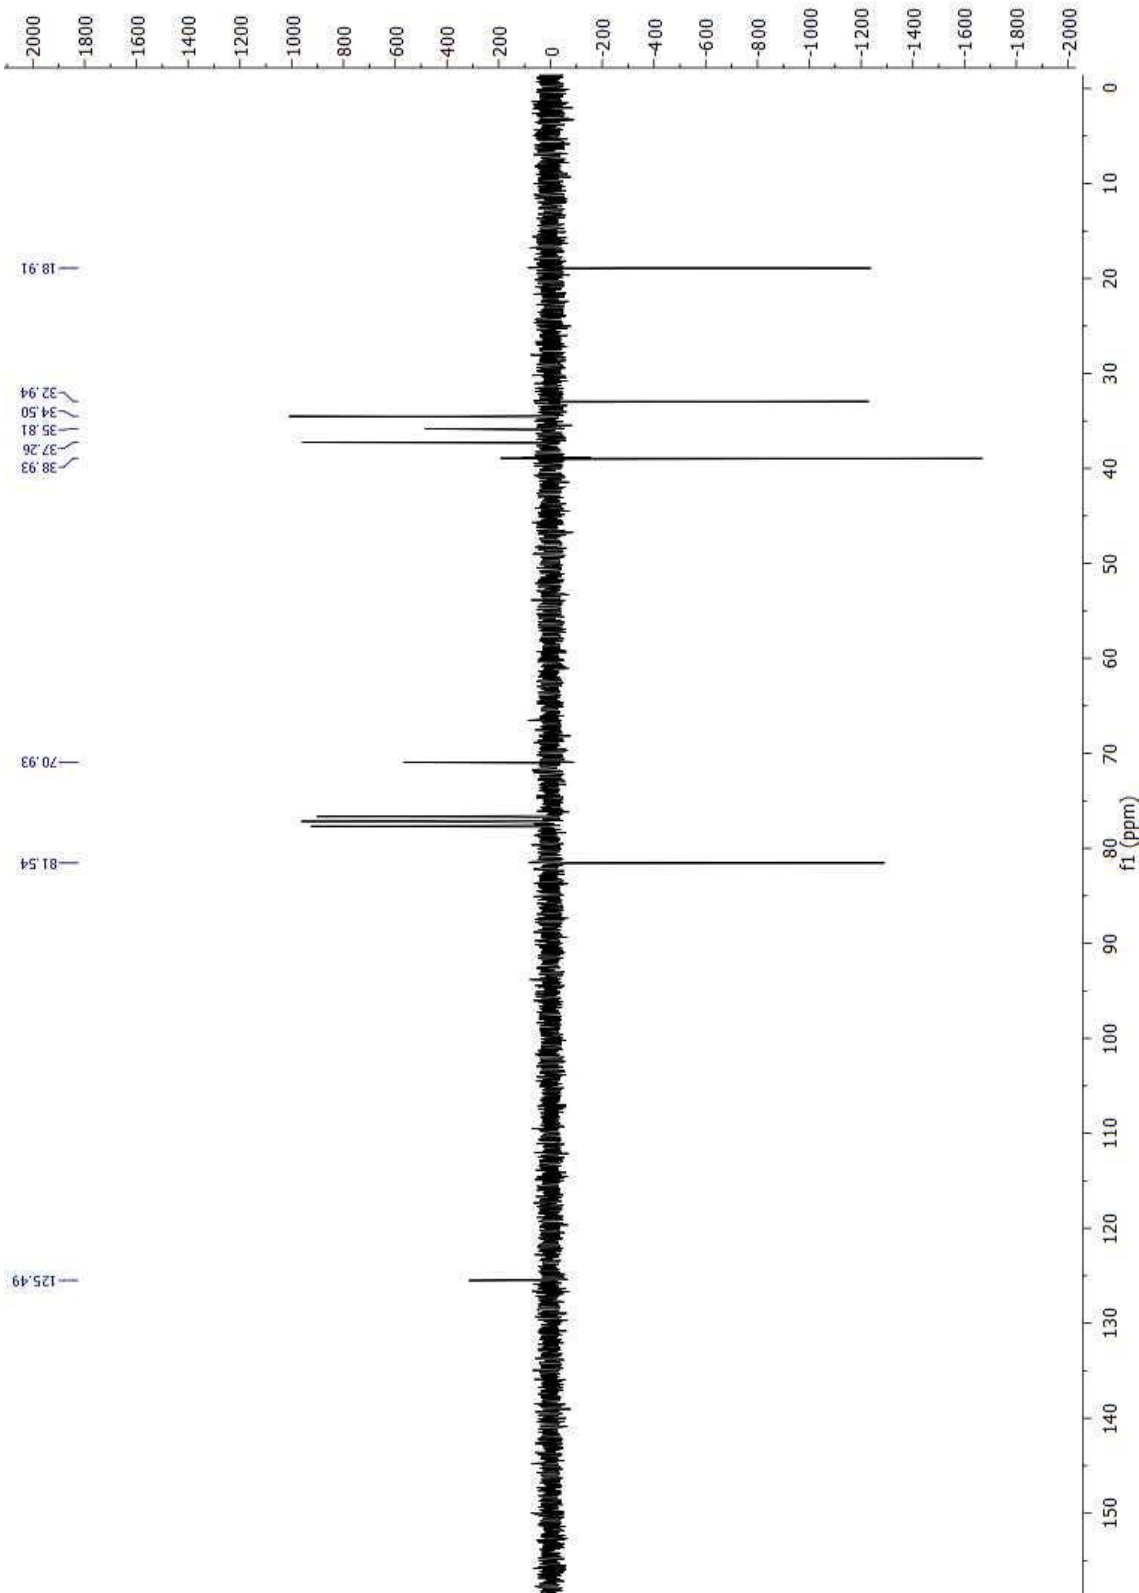

**meso-Diallylic alcohol 10 – <sup>1</sup>H NMR (400 MHz)**

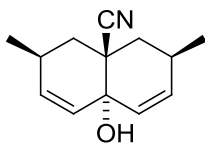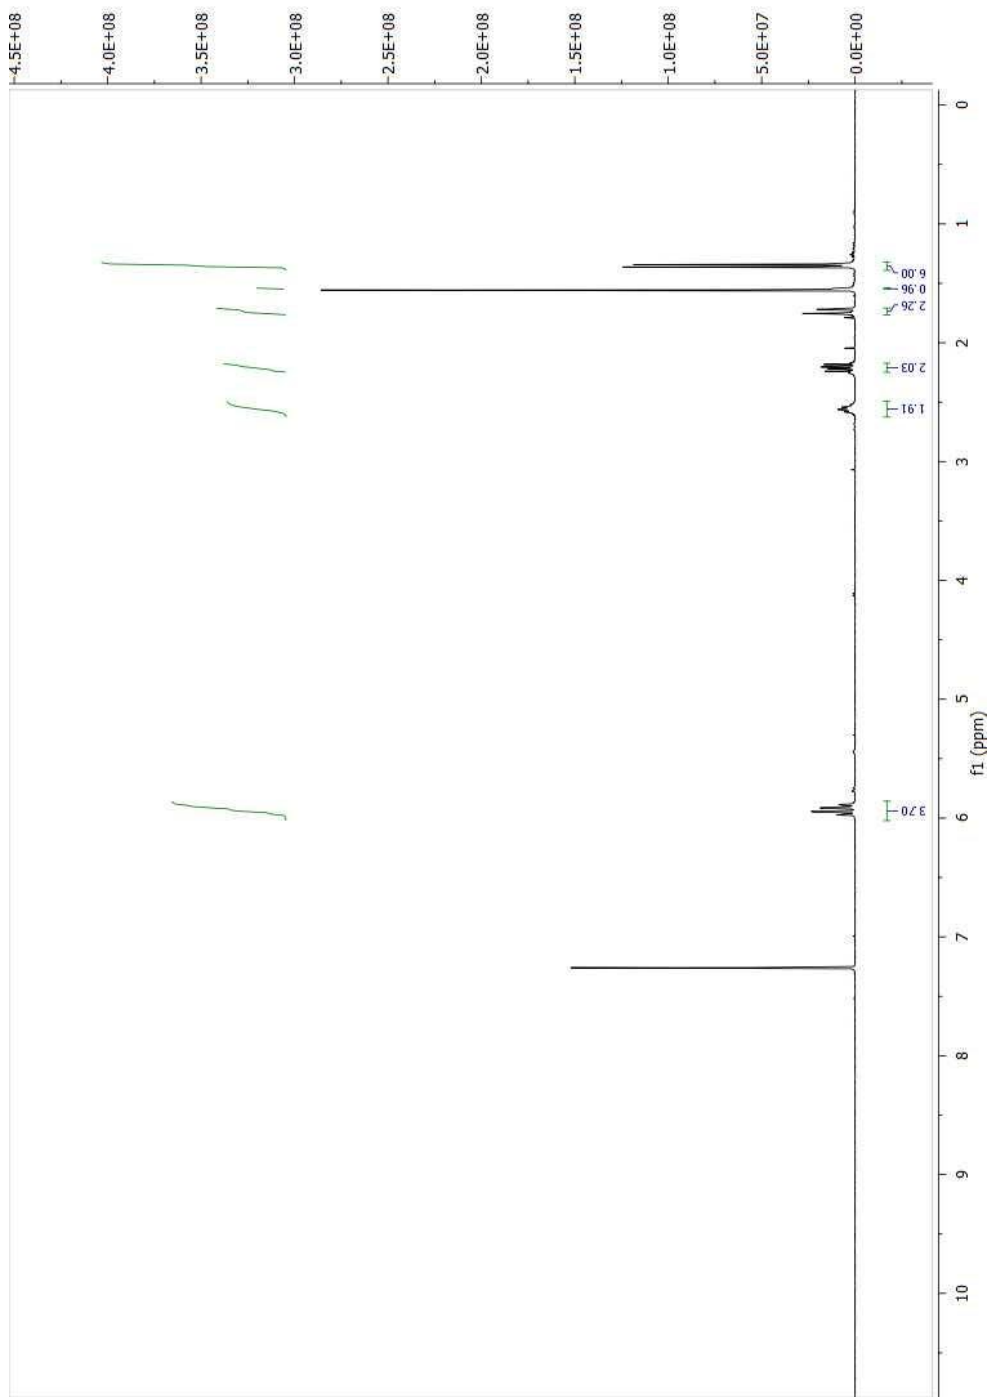

**meso-Diallylic alcohol 10 – <sup>13</sup>C NMR (100 MHz)**

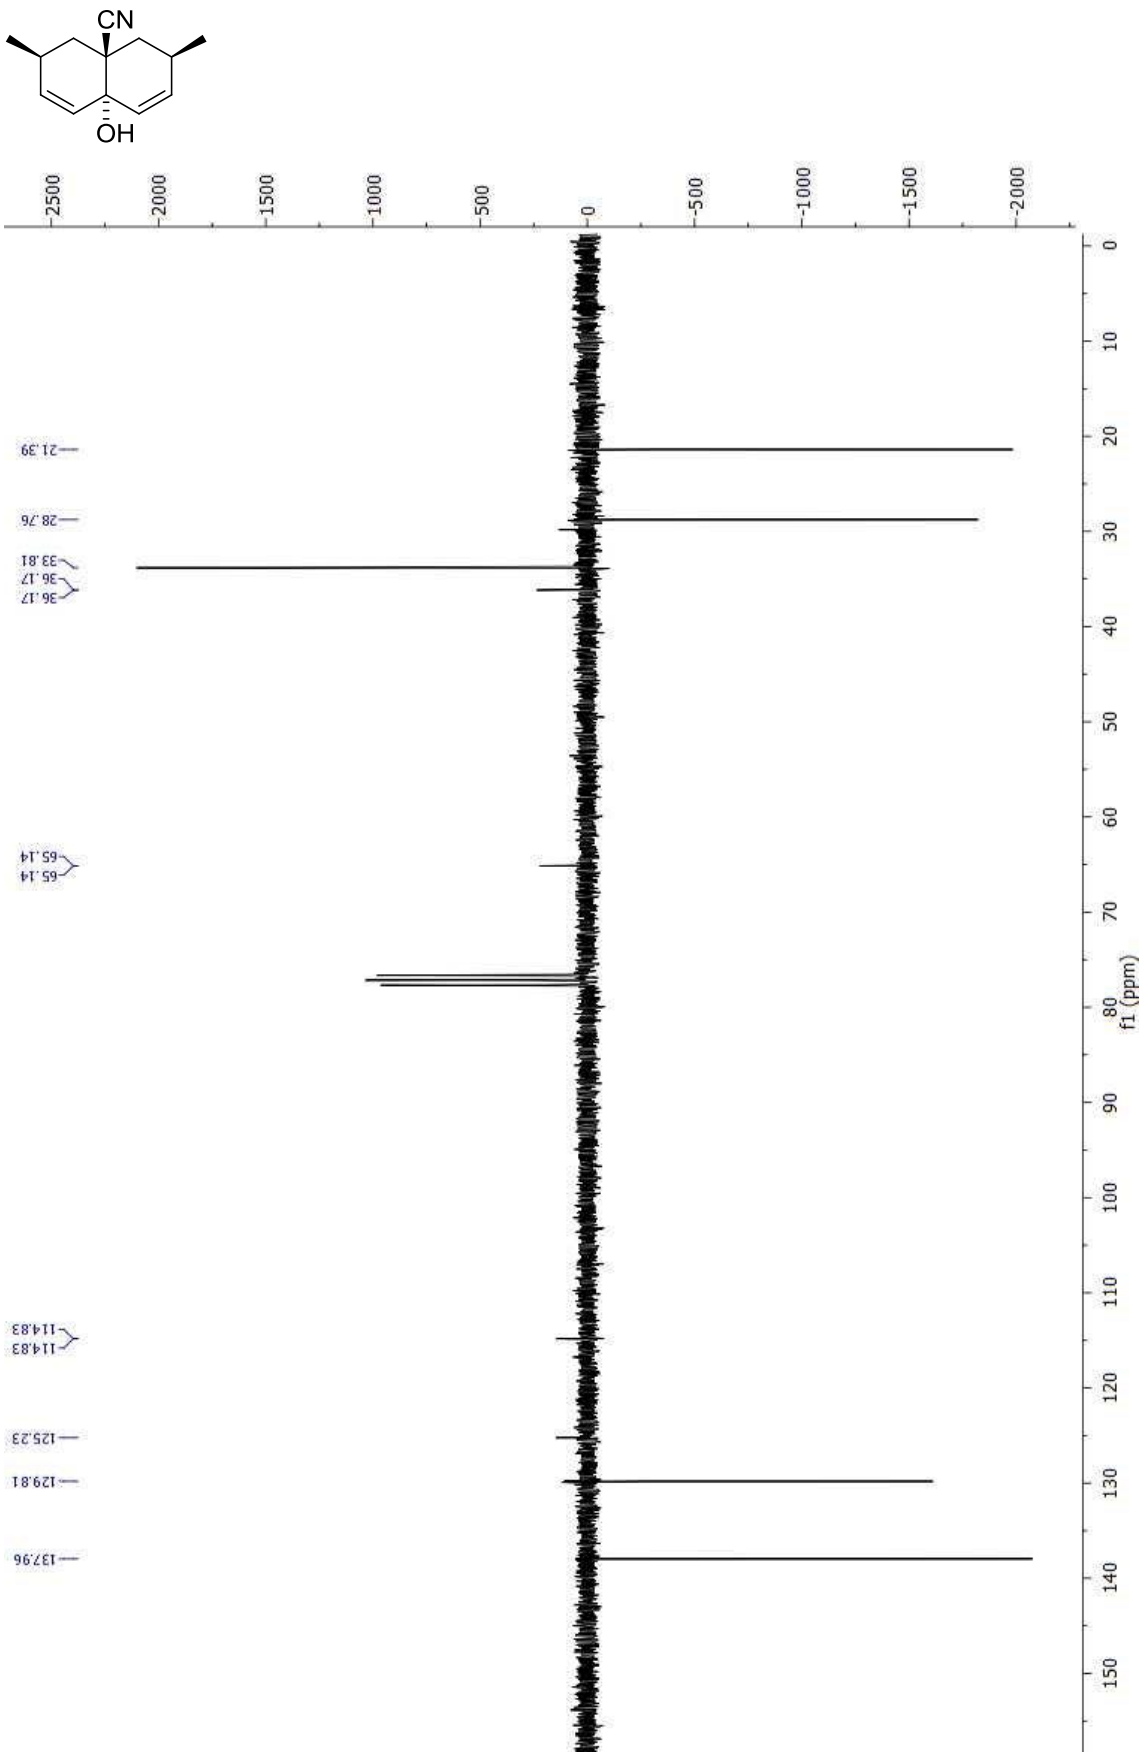

(±)-Monoepoxide 3 – <sup>1</sup>H NMR (400 MHz)

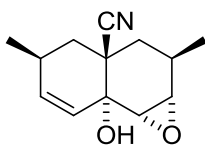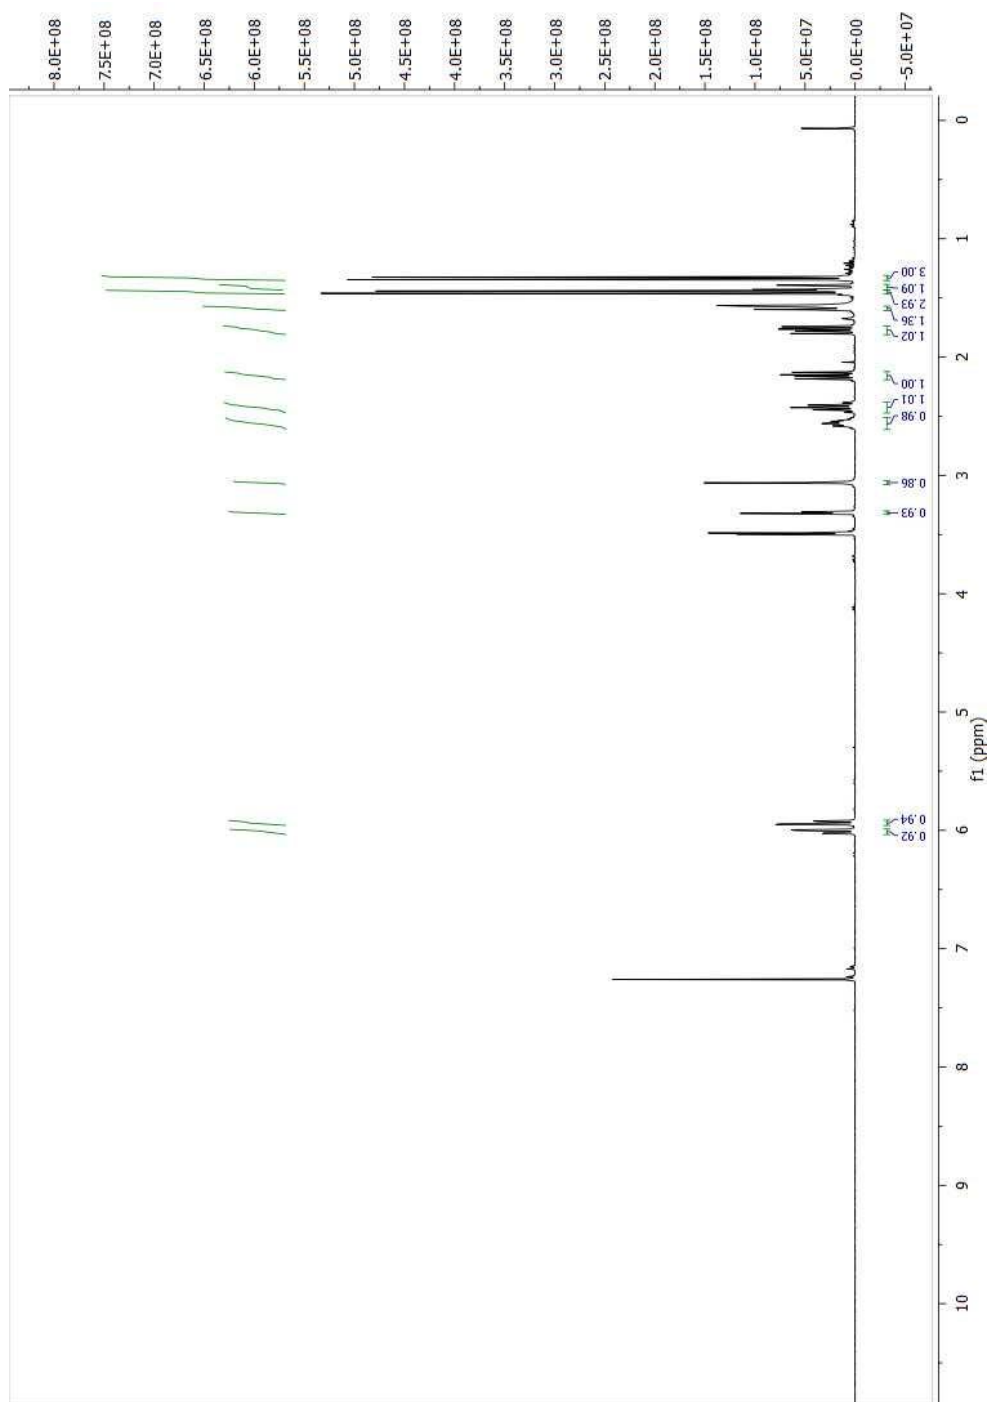

(±)-Monoepoxide 3 – <sup>13</sup>C NMR (100 MHz)

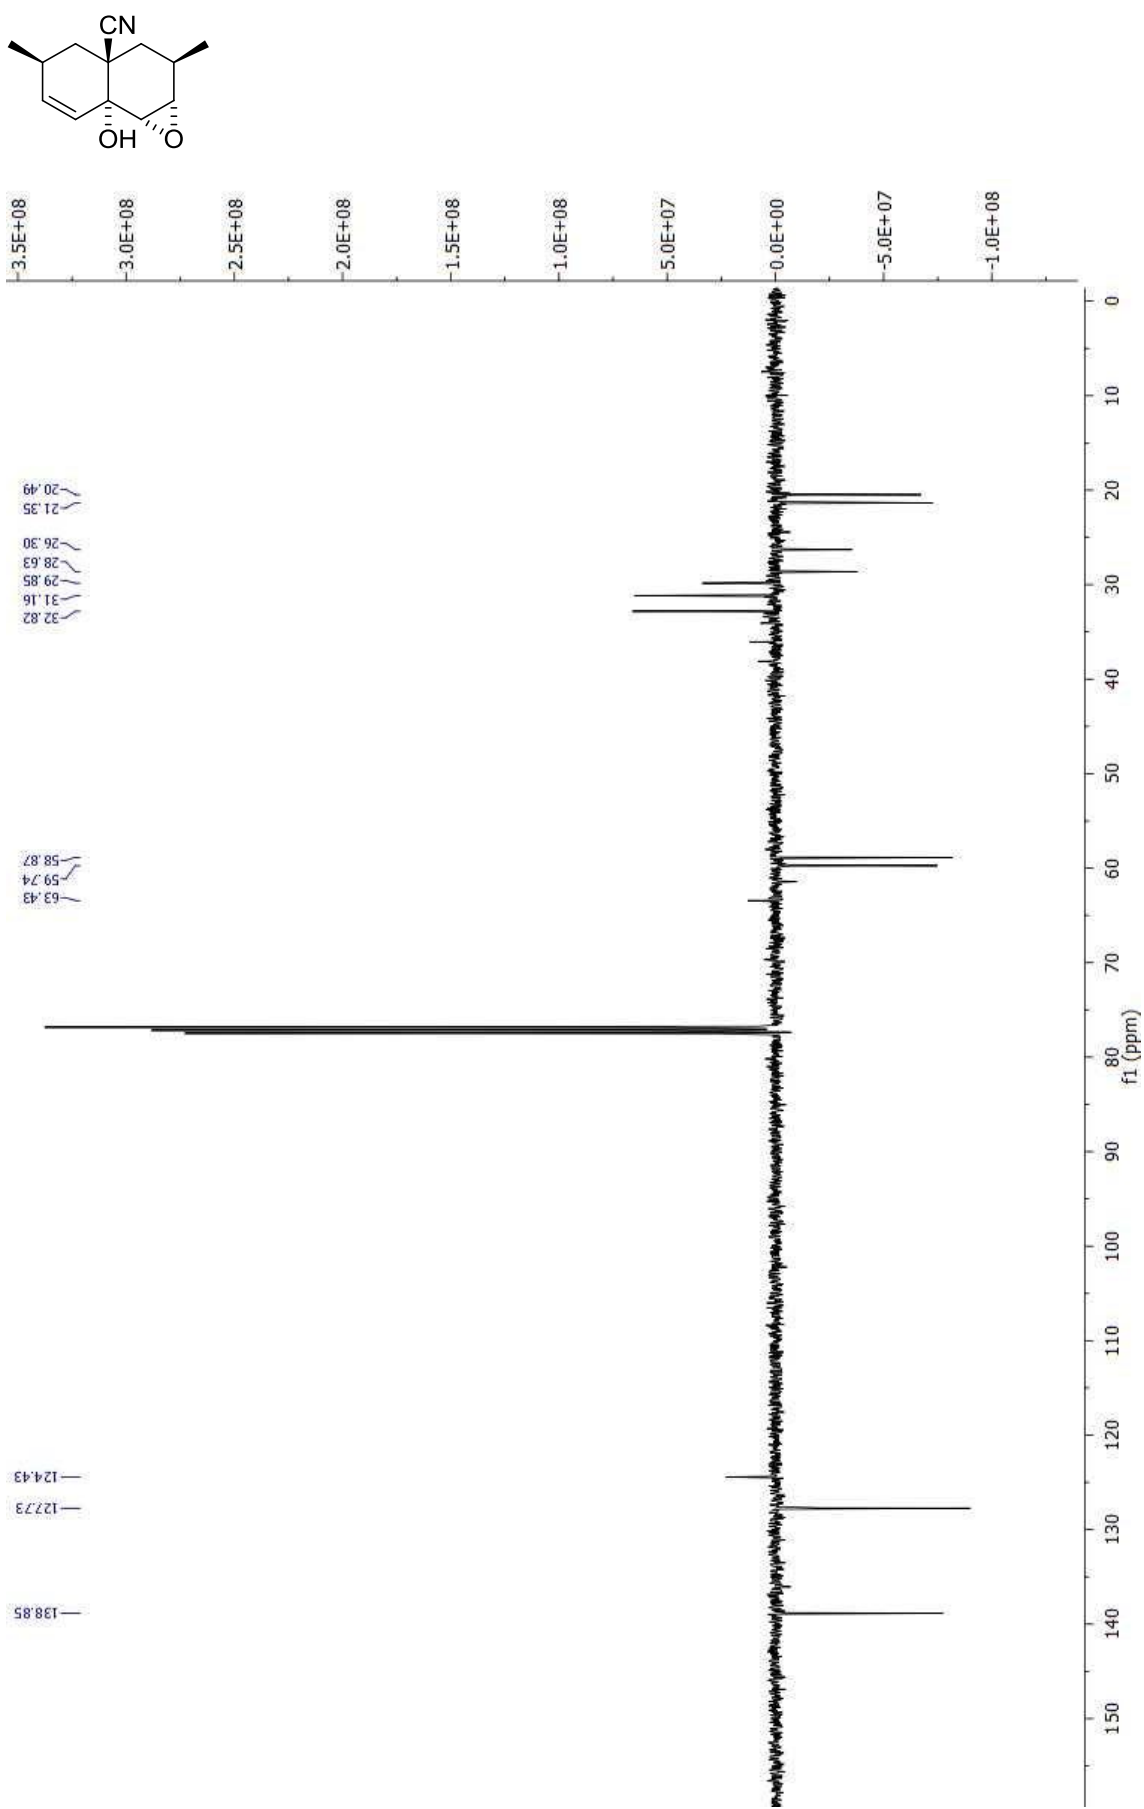

**Meso-bis-epoxide 11 – <sup>1</sup>H NMR (250 MHz)**

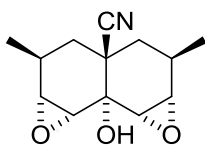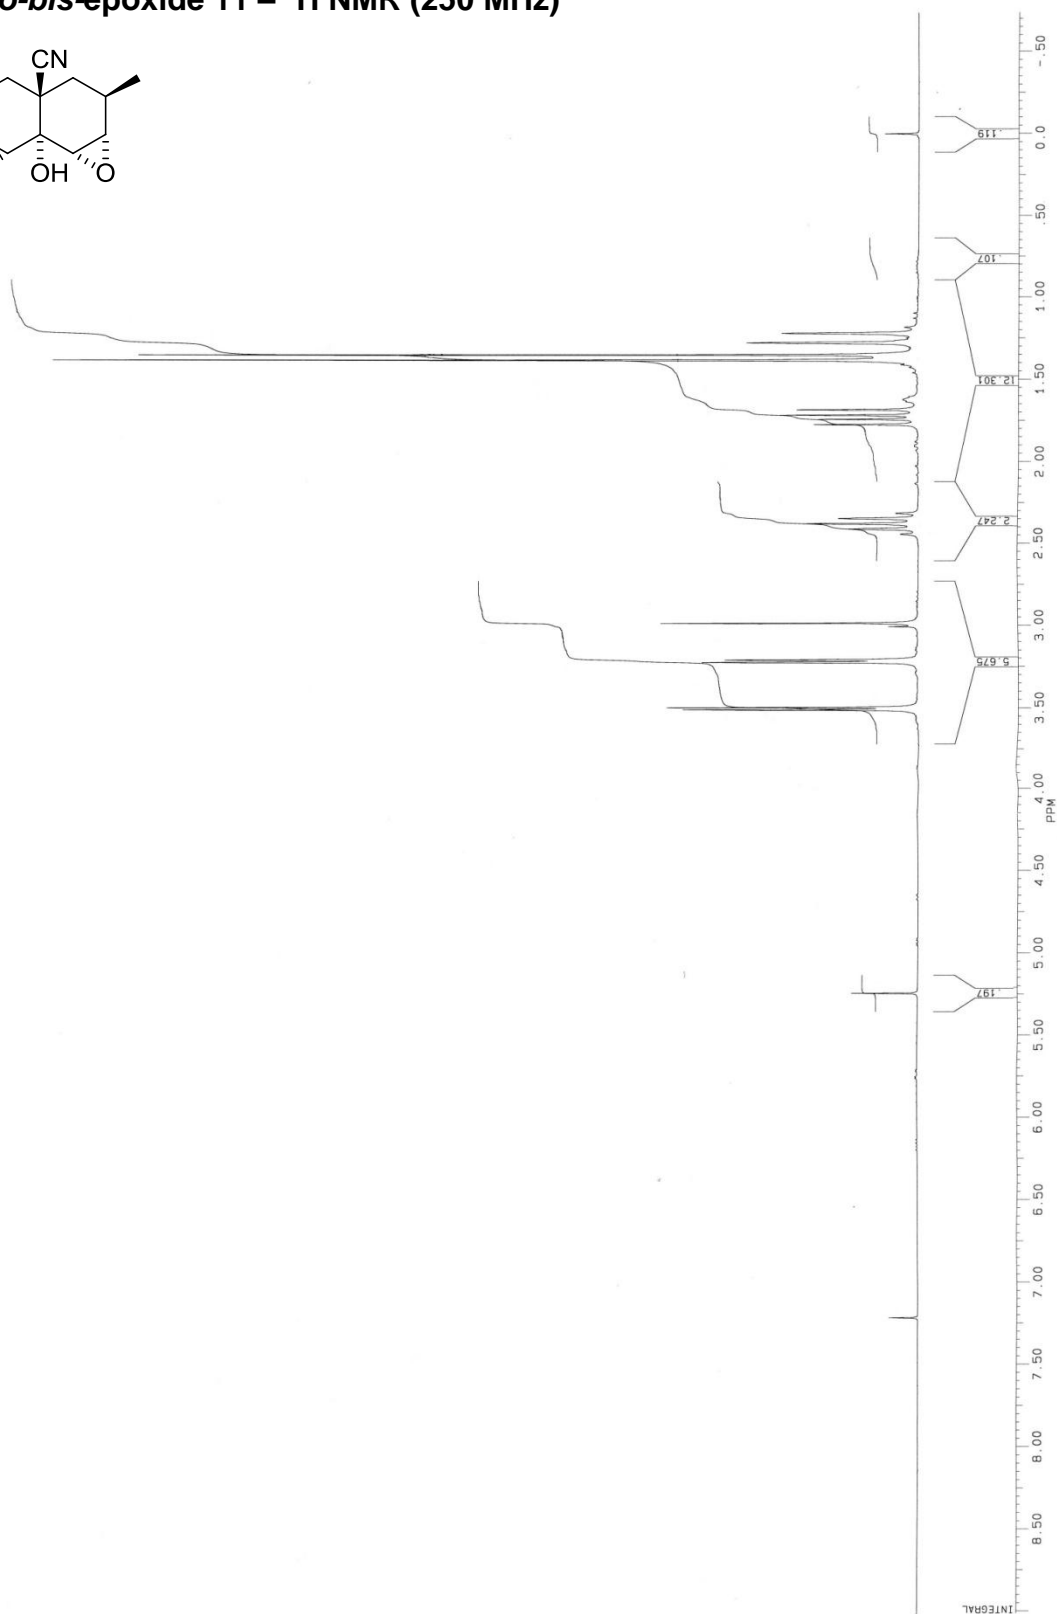

Propionate 12 – <sup>1</sup>H NMR (270 MHz)

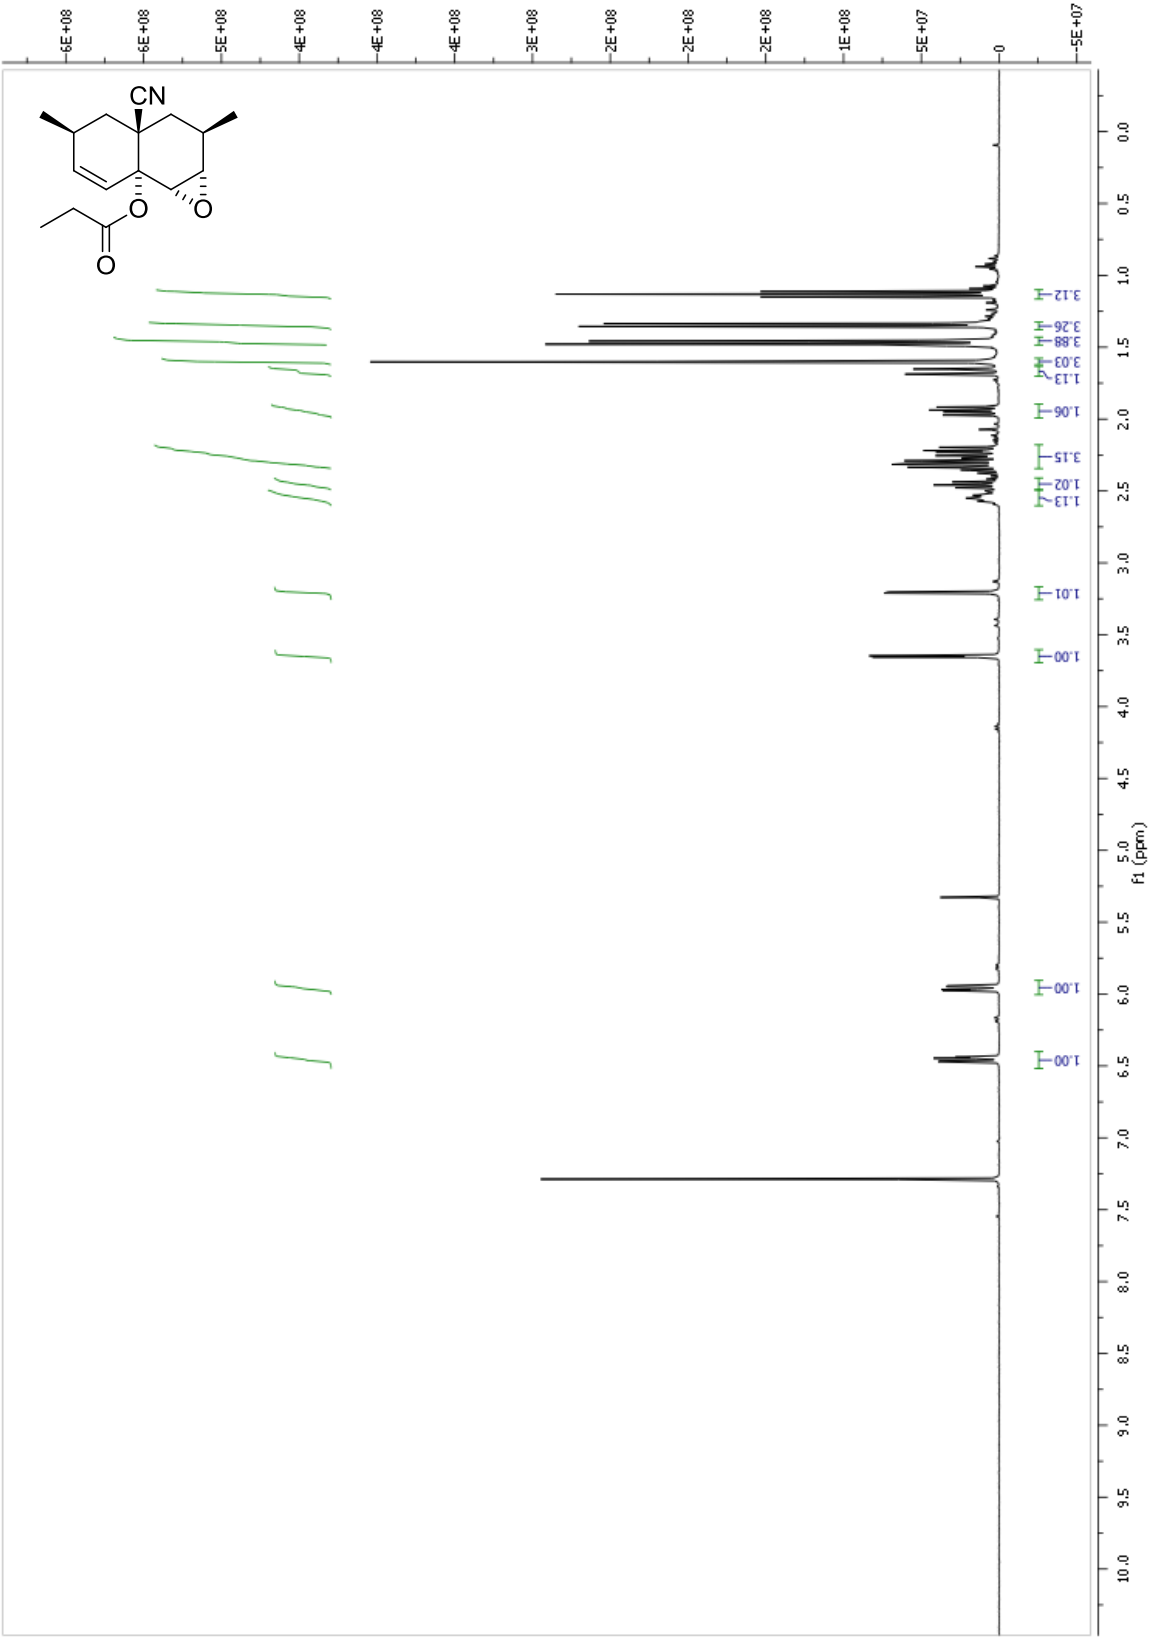

Propionate 12 – <sup>13</sup>C DEPT NMR (63 MHz)

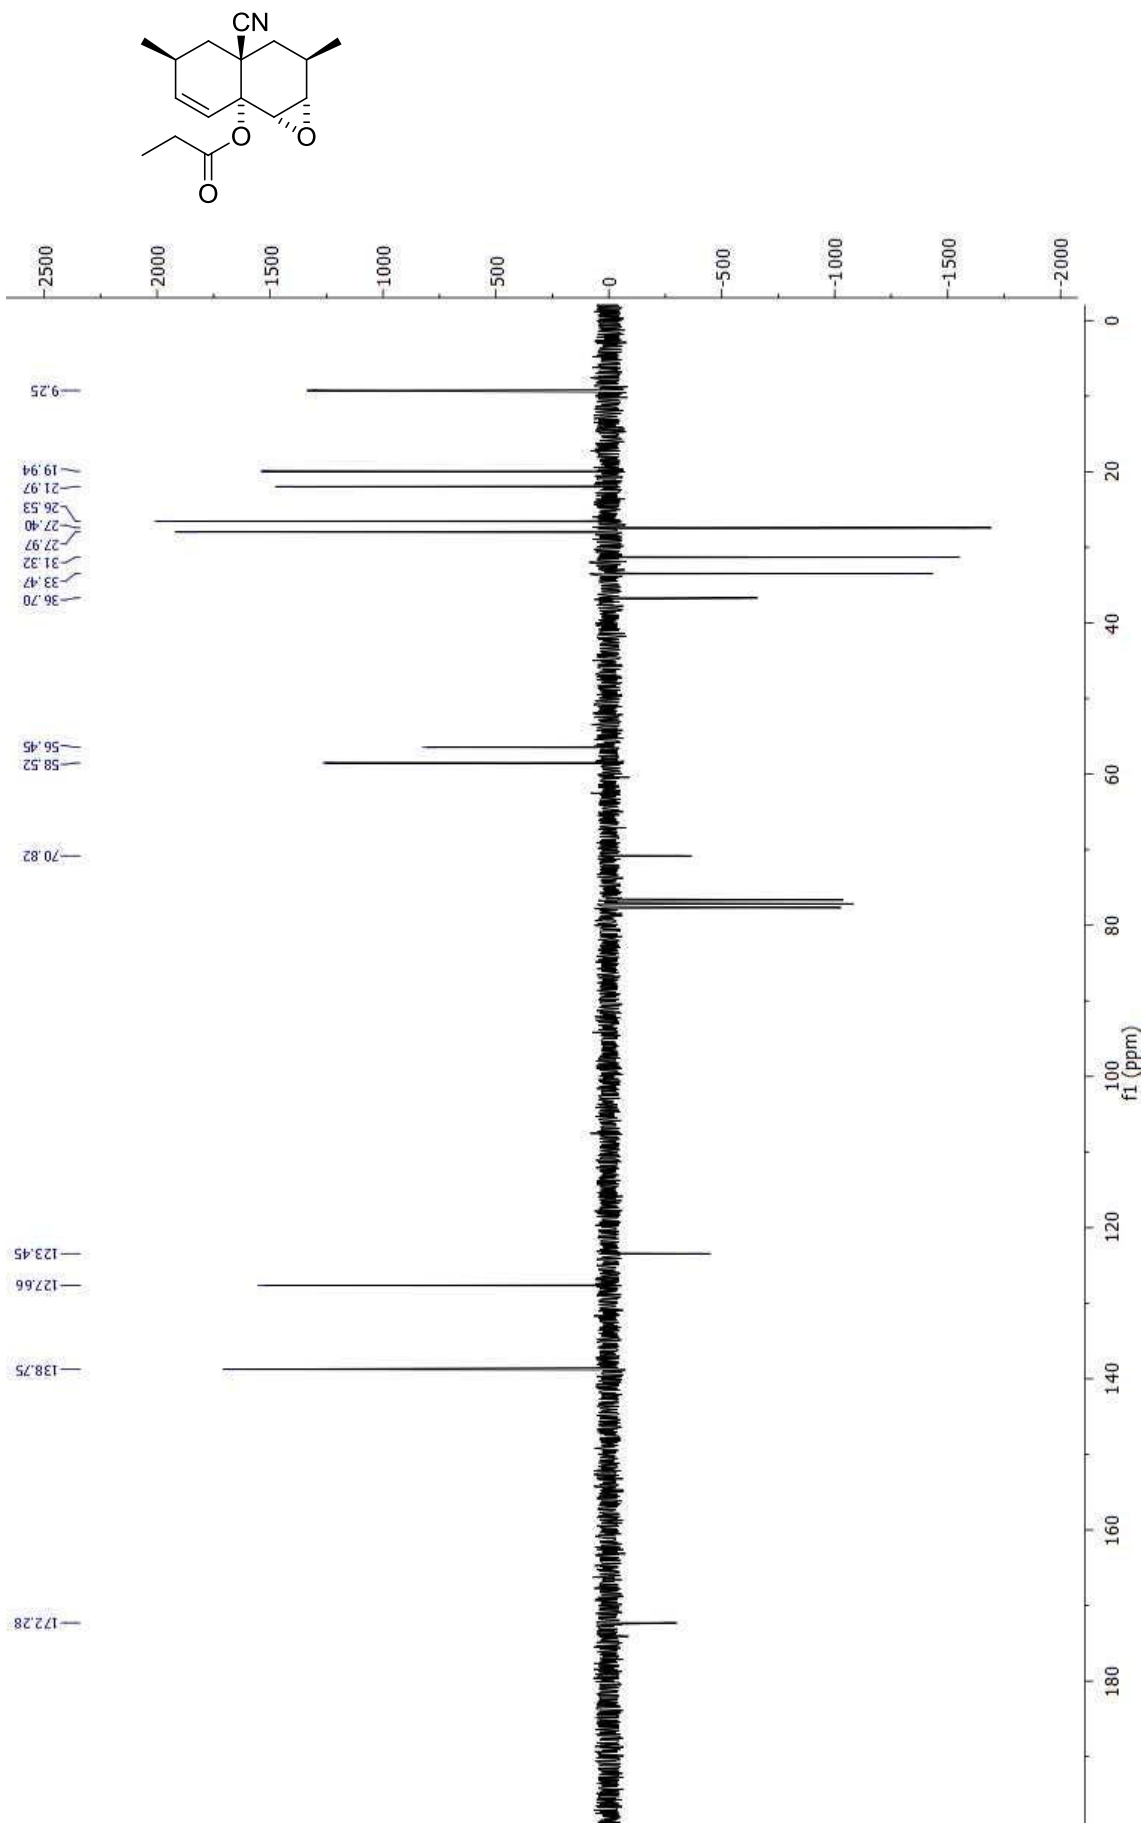



# Lactone 13a – $^1\text{H}$ NMR (300 MHz)

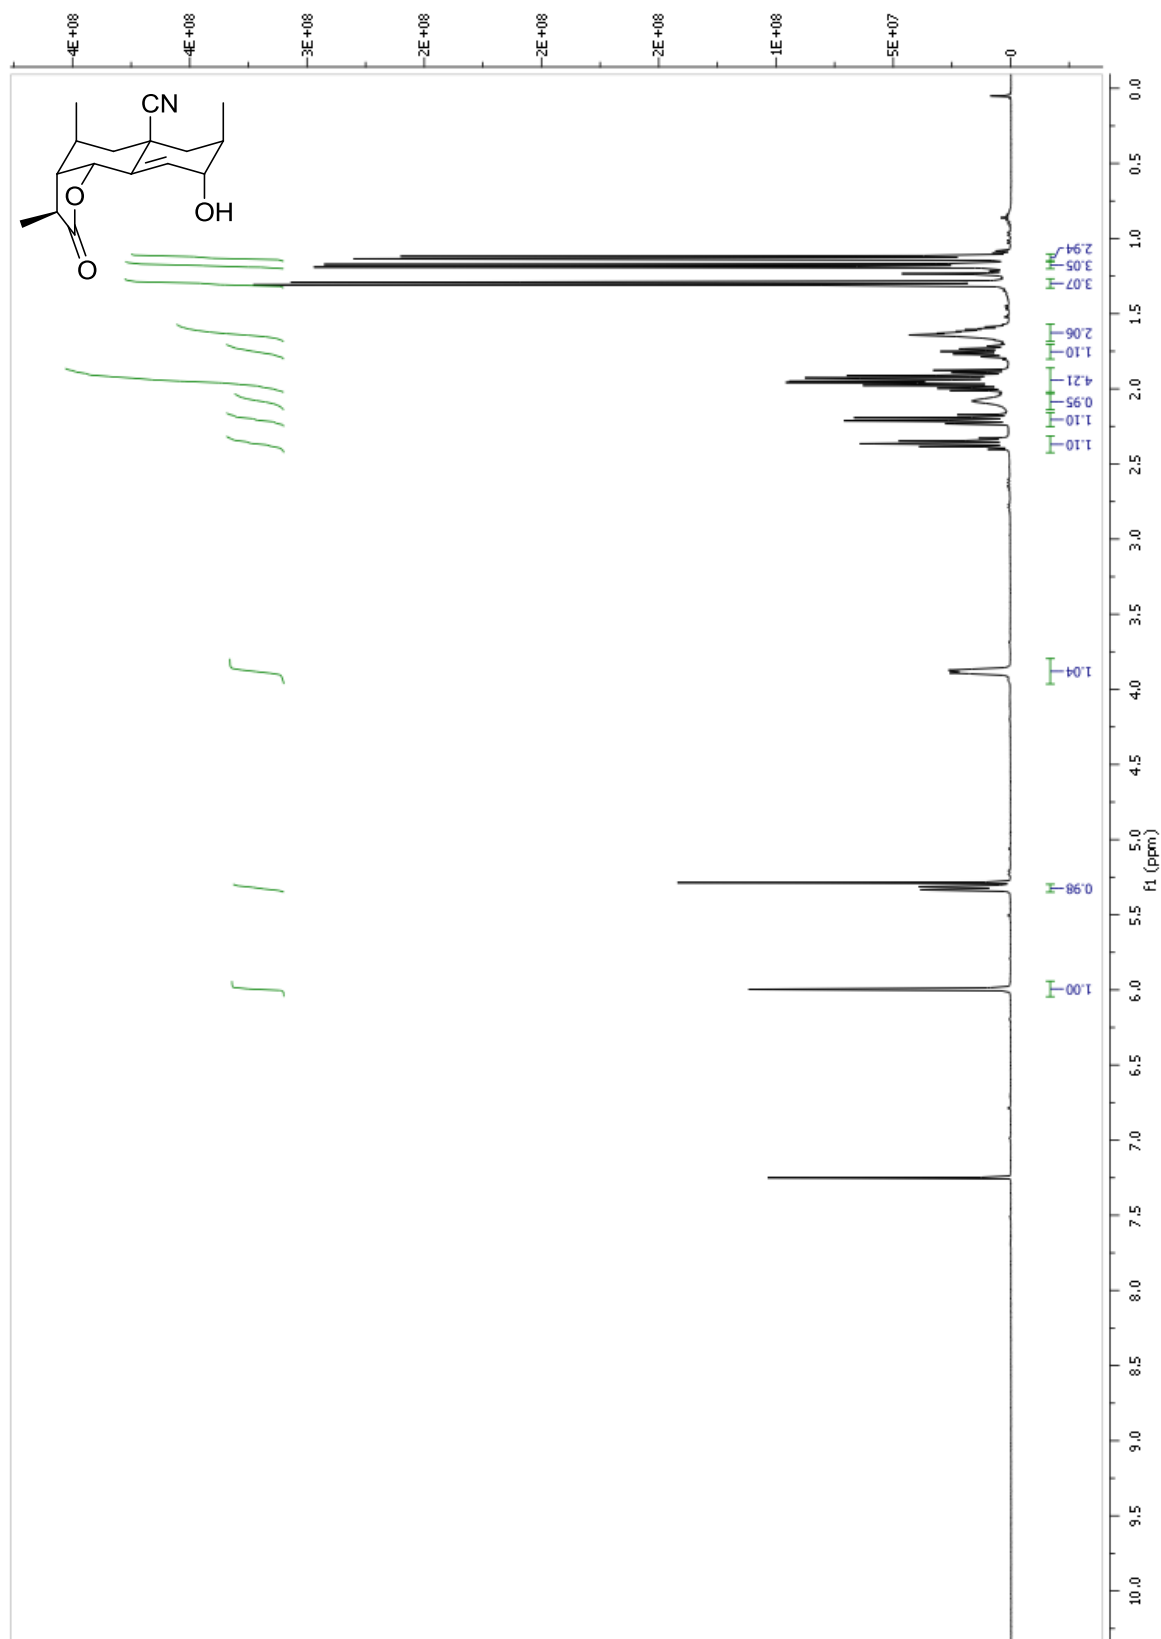

Lactone 13a - <sup>13</sup>C NMR (63 MHz)

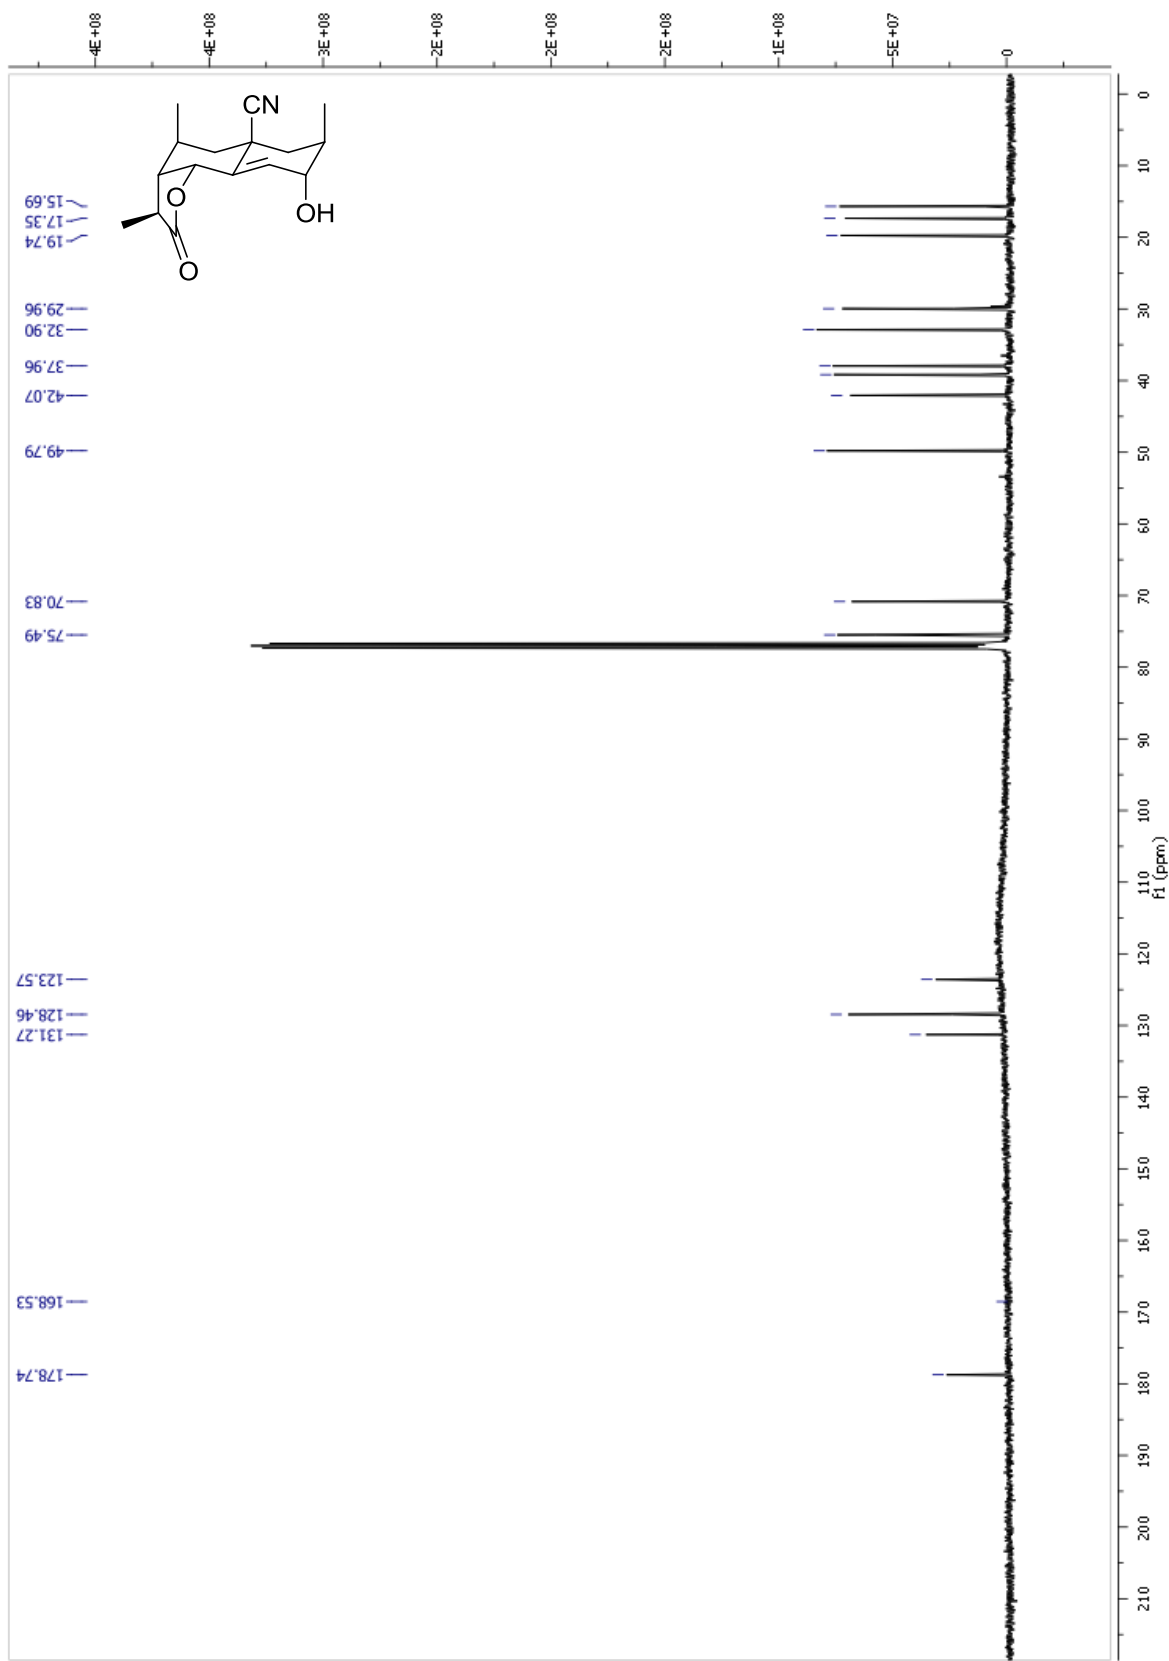

Benzoate ester 14 – <sup>1</sup>H NMR (270 MHz)

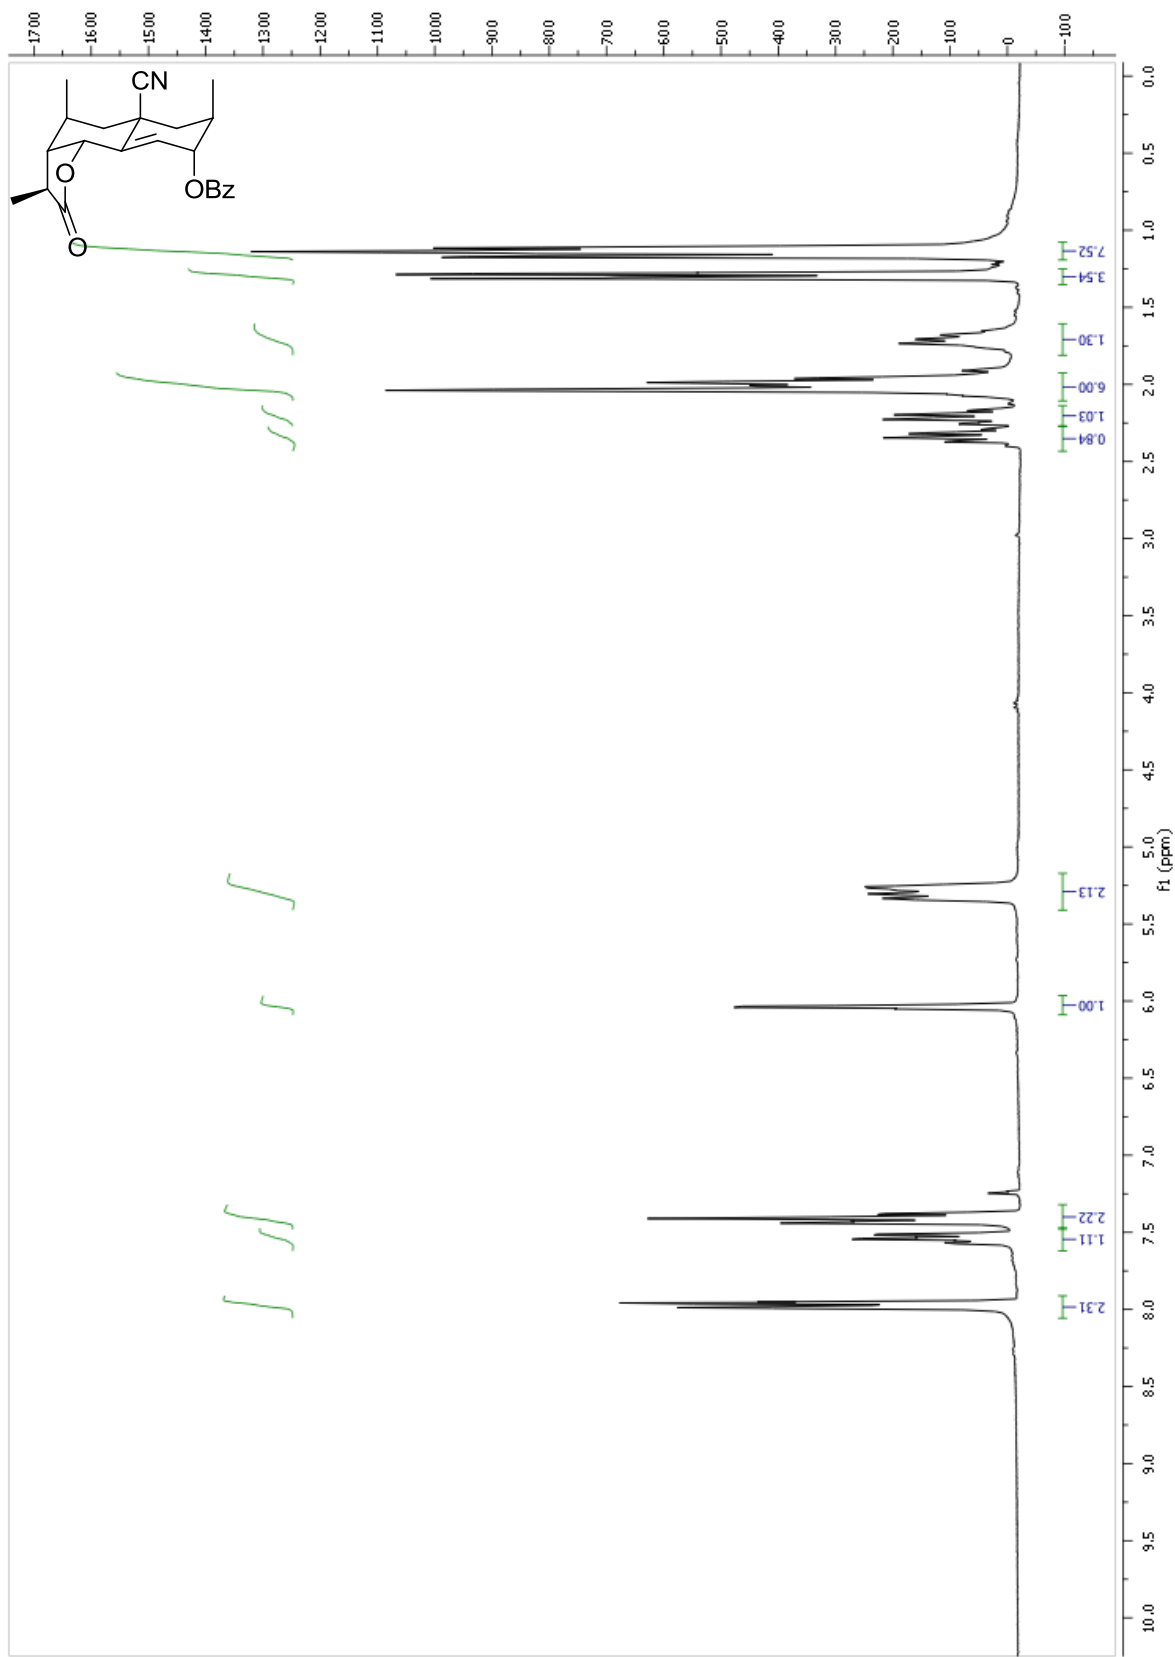

Benzoate ester 14 - <sup>13</sup>C NMR (68 MHz)

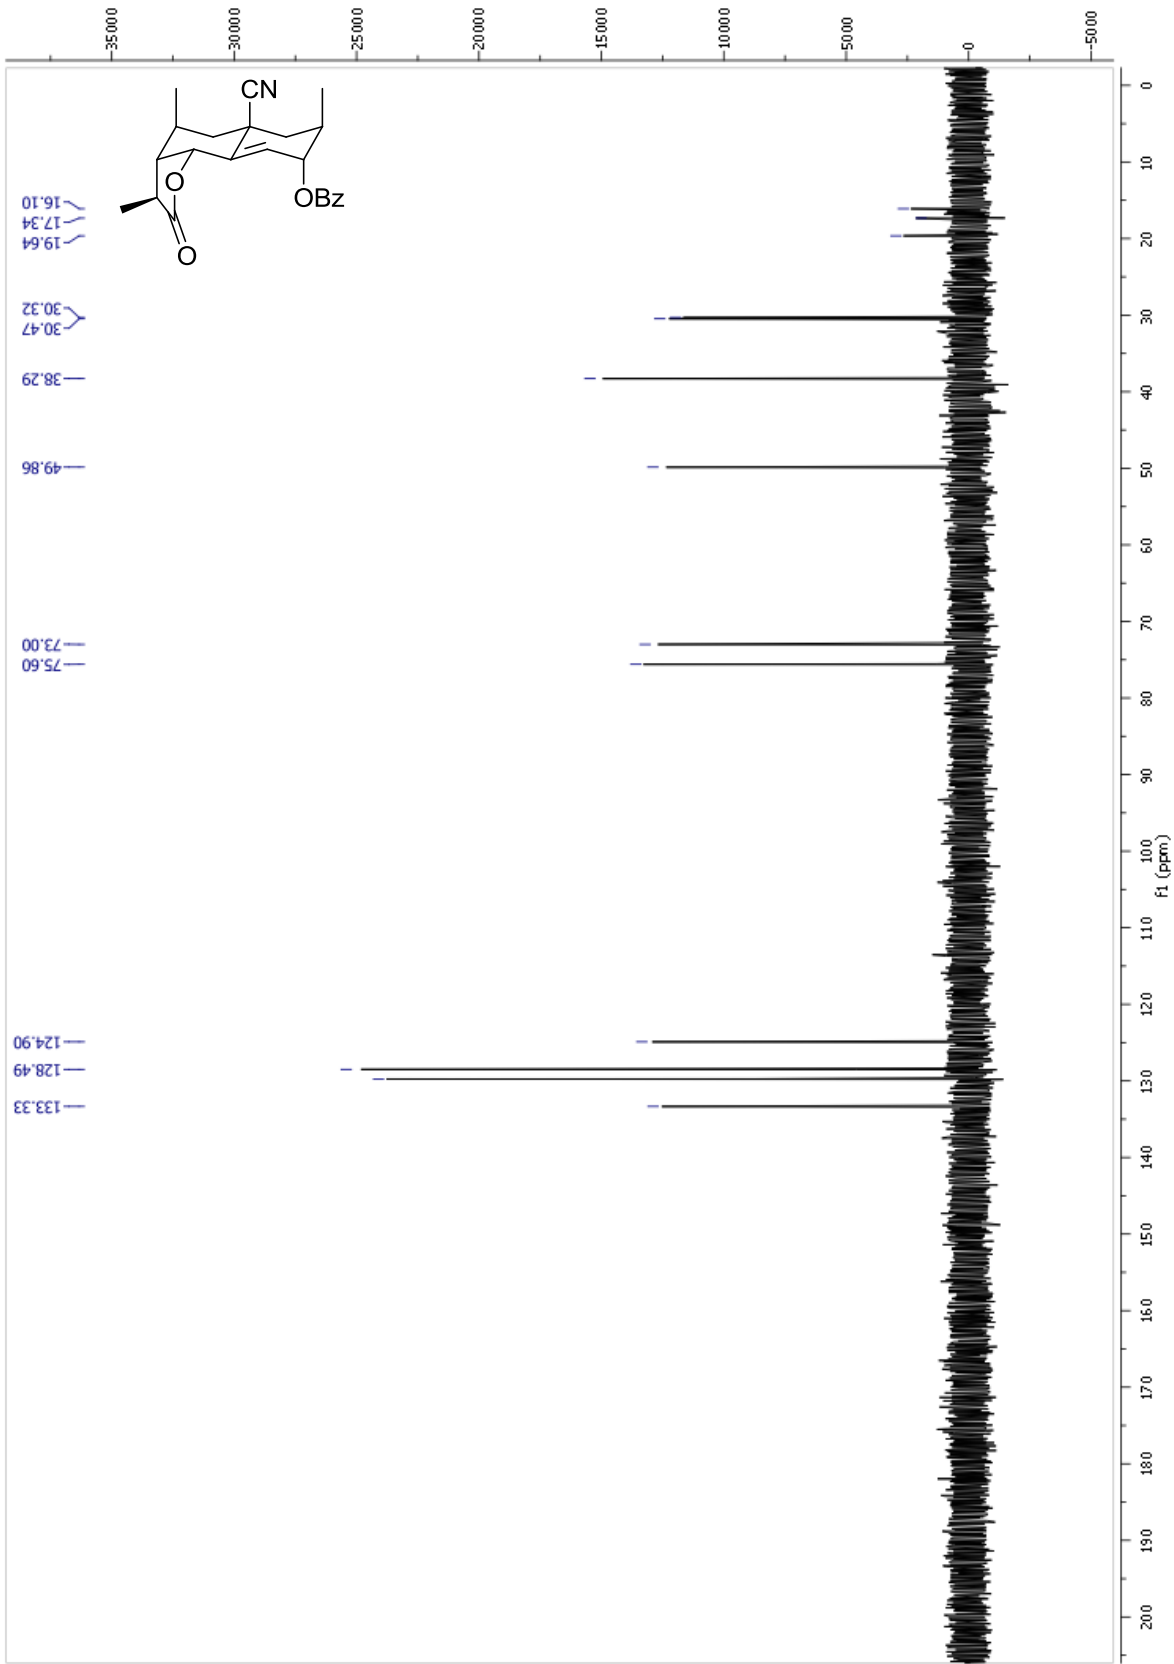

Bromide 15 - <sup>1</sup>H NMR (270 MHz)

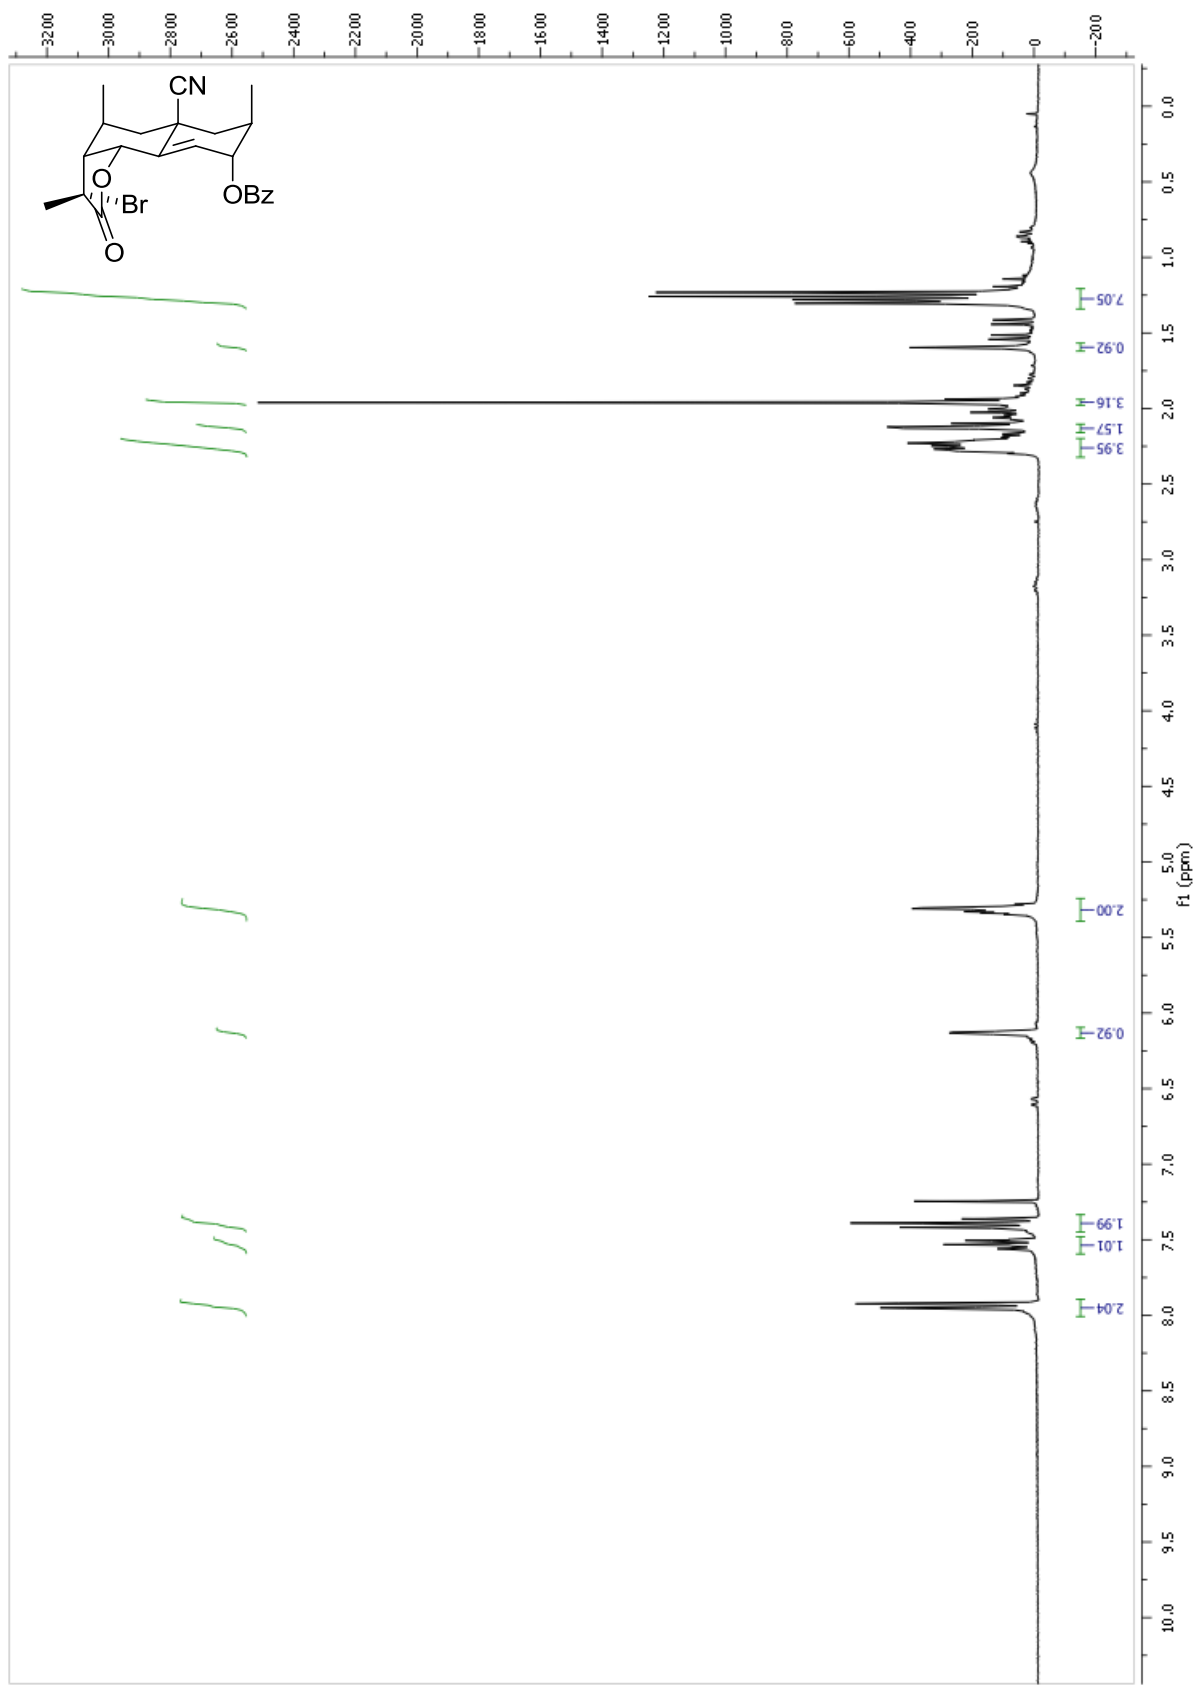

Bromide 15 - <sup>13</sup>C DEPT NMR (68 MHz)

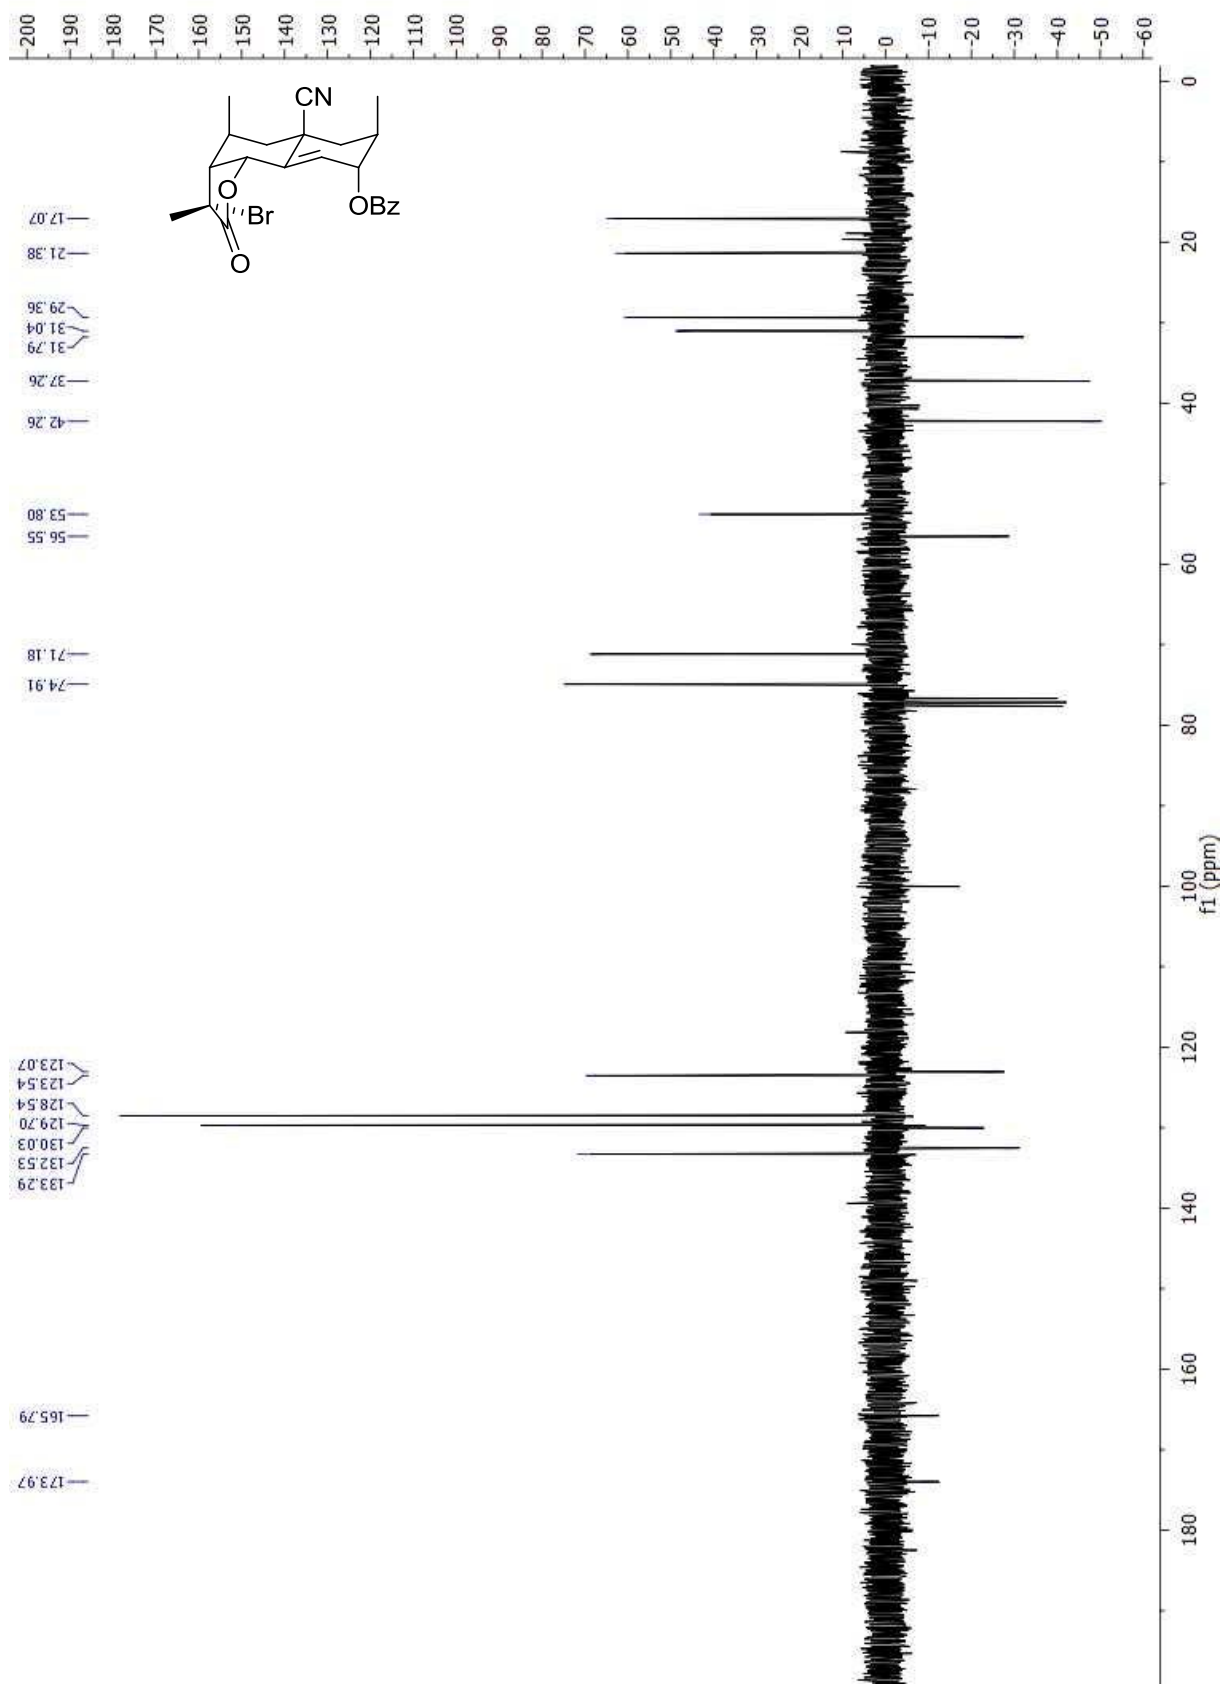

Hydroxytetrahydrofuran 16 - <sup>1</sup>H NMR (400 MHz)

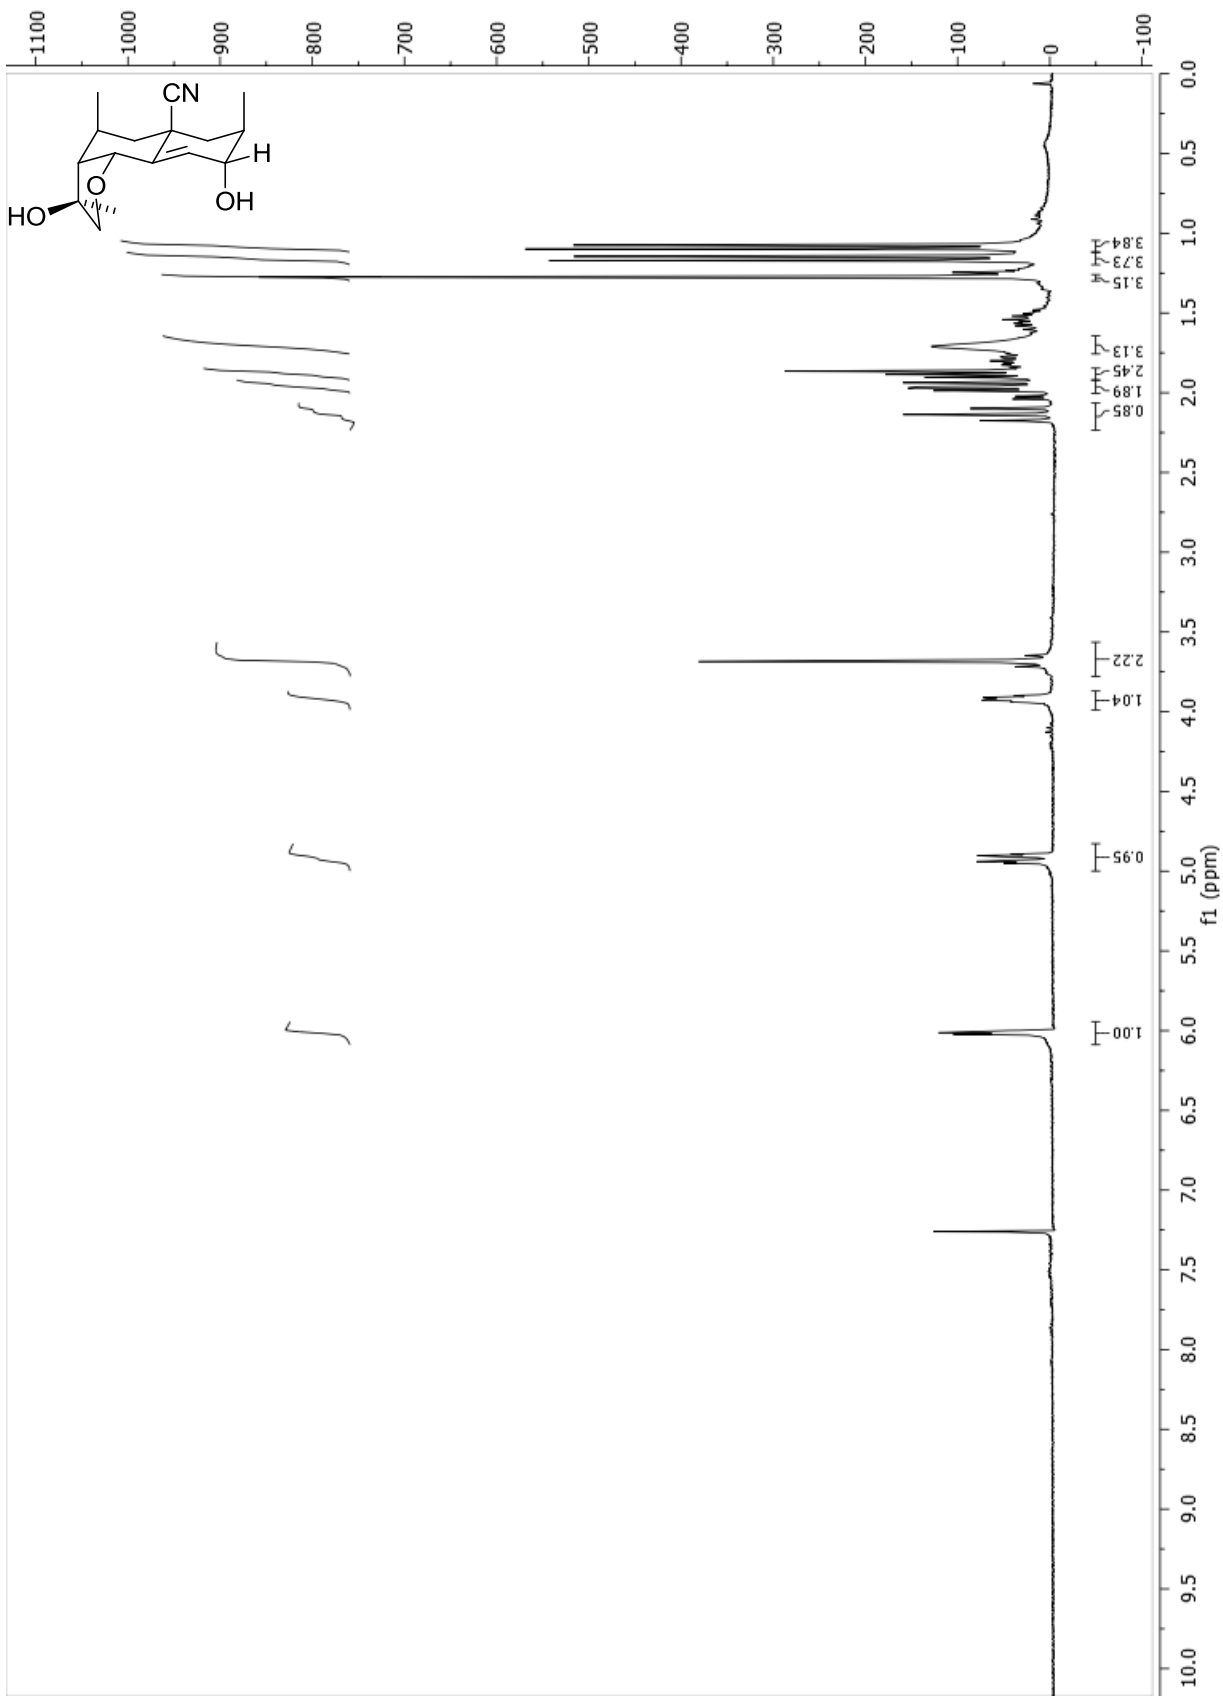

# Hydroxytetrahydrofuran 16 - $^{13}\text{C}$ NMR (100 MHz)

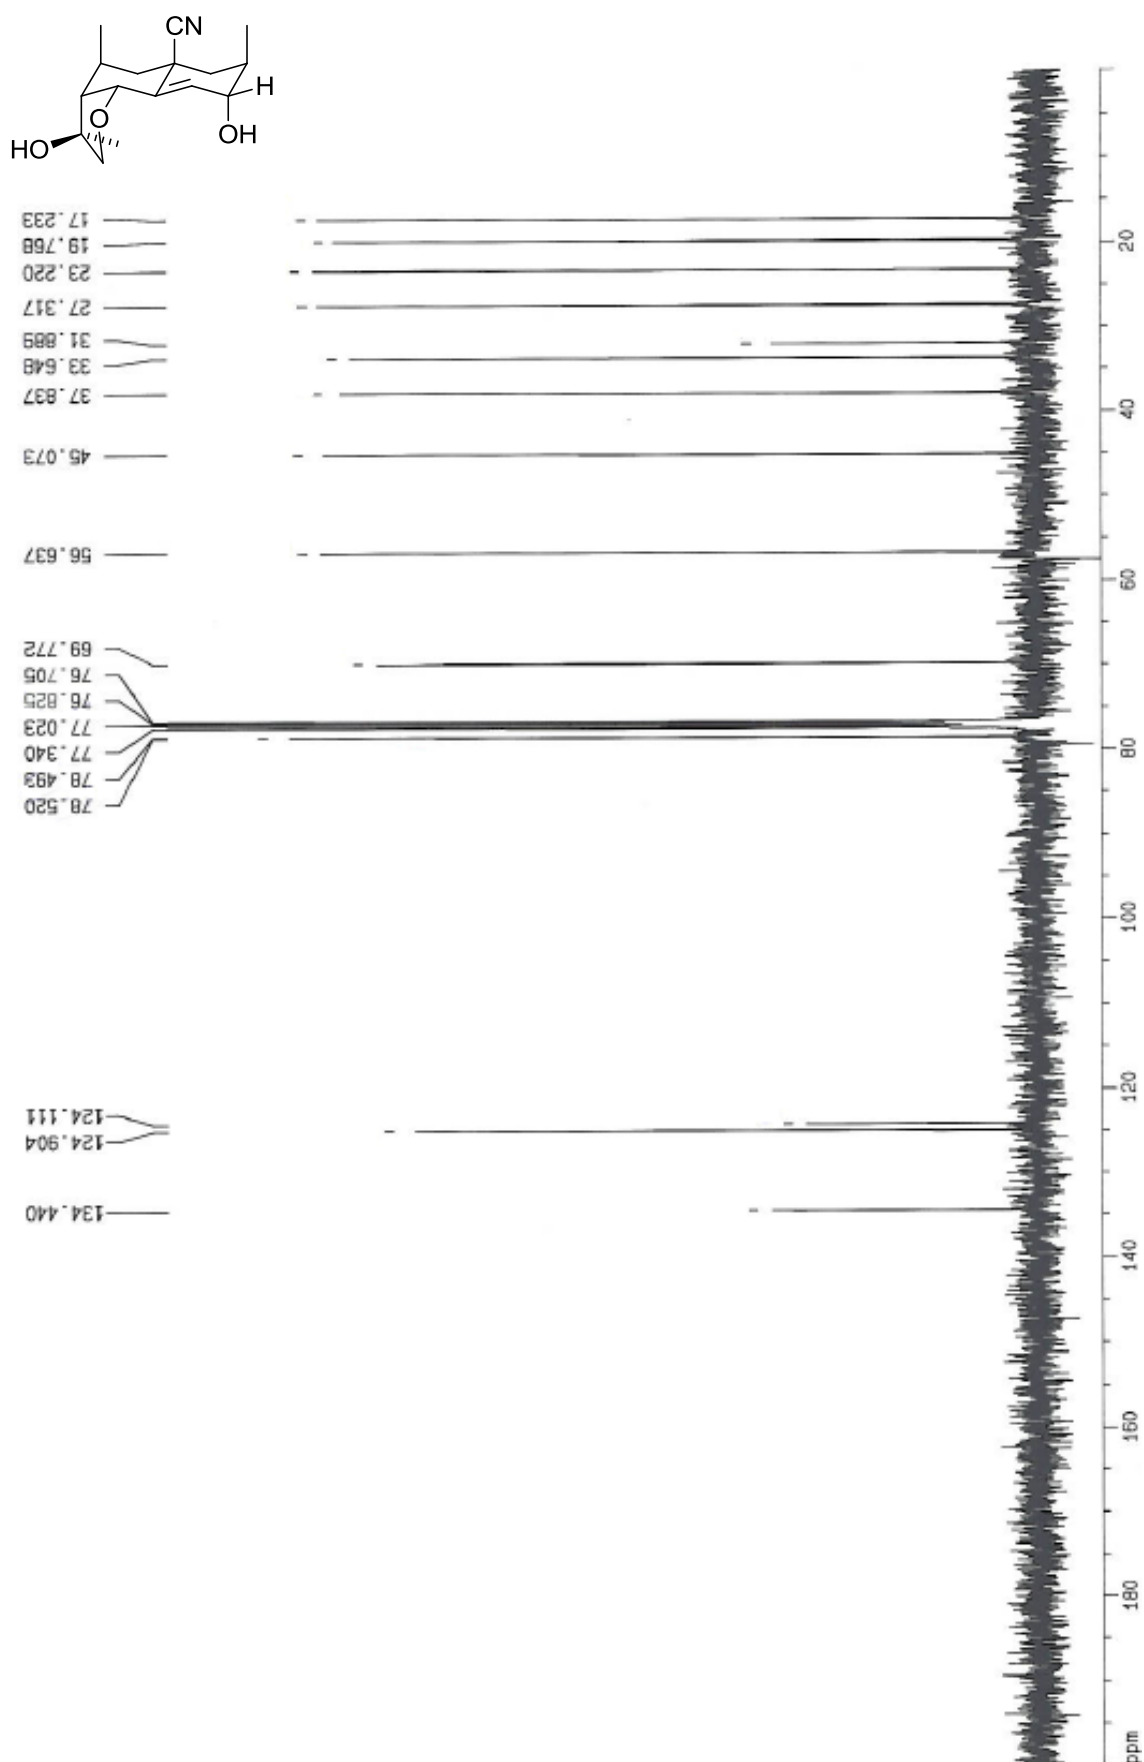



Benzoyloxytetrahydrofuran 17 - <sup>1</sup>H NMR (270 MHz)

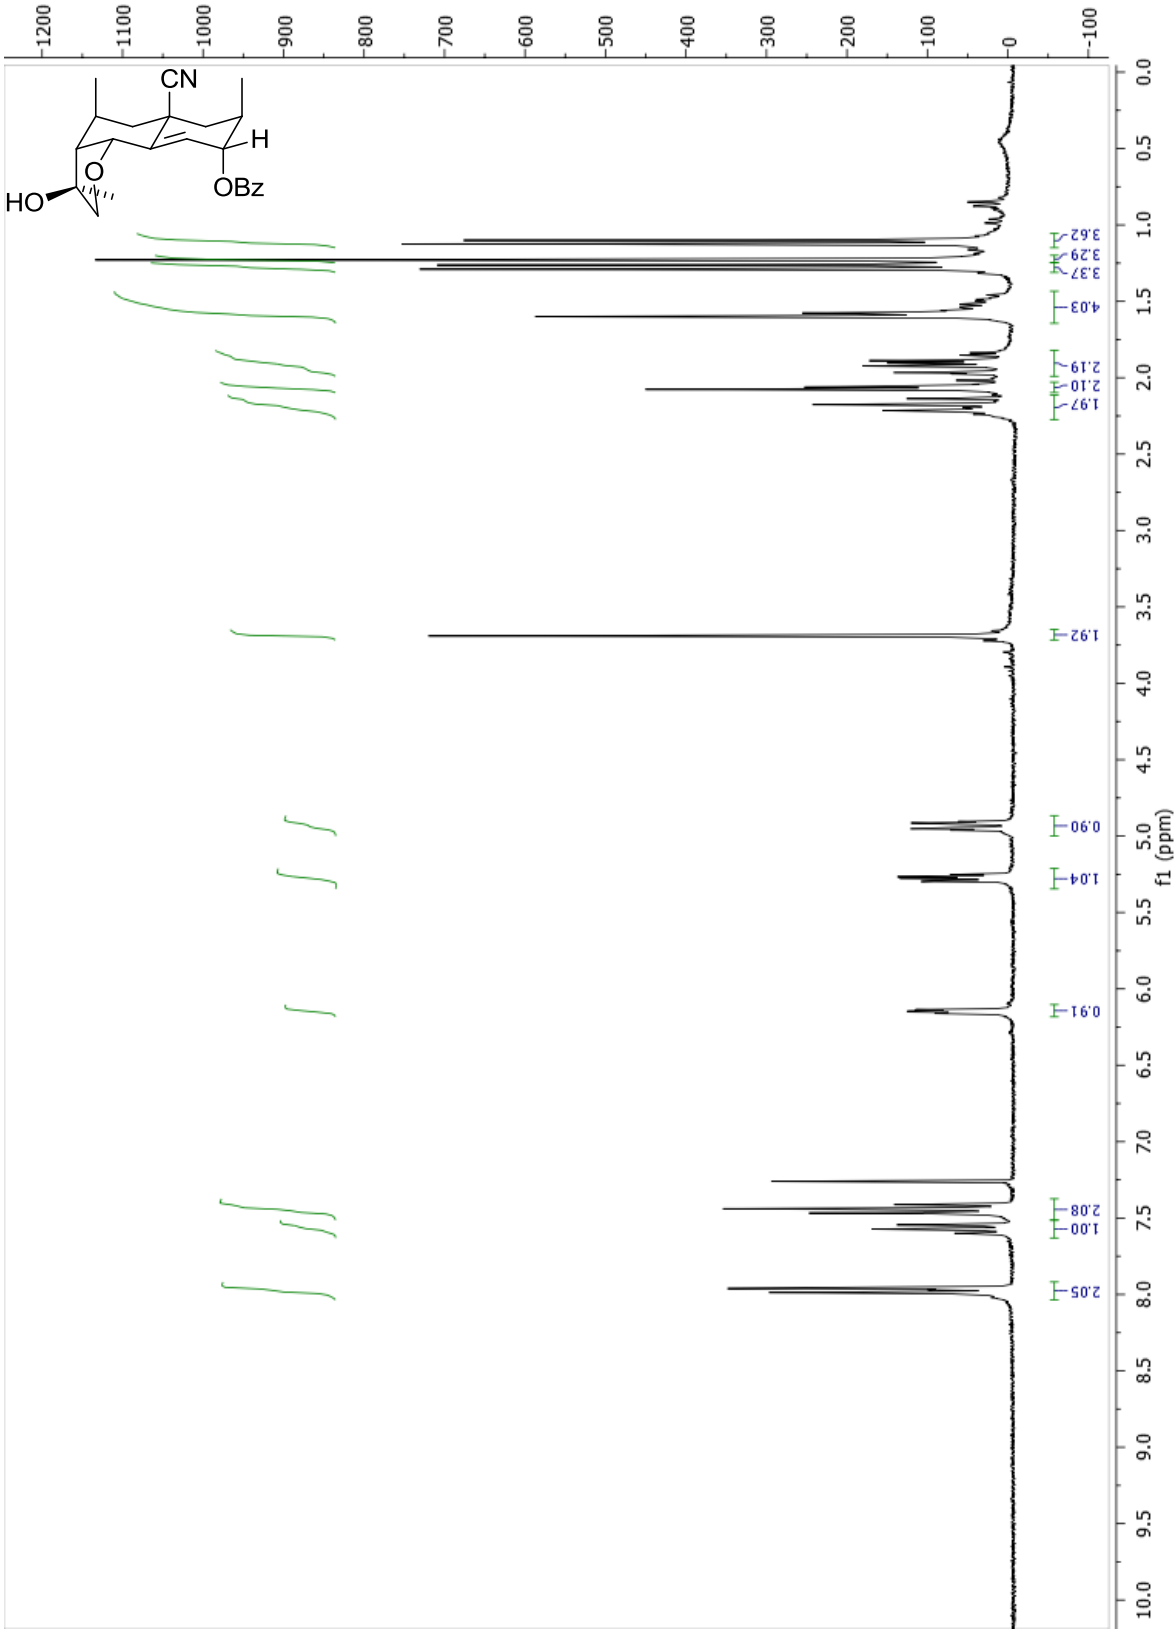

Benzoyloxytetrahydrofuran 17 – <sup>13</sup>C DEPT NMR (68 MHz)

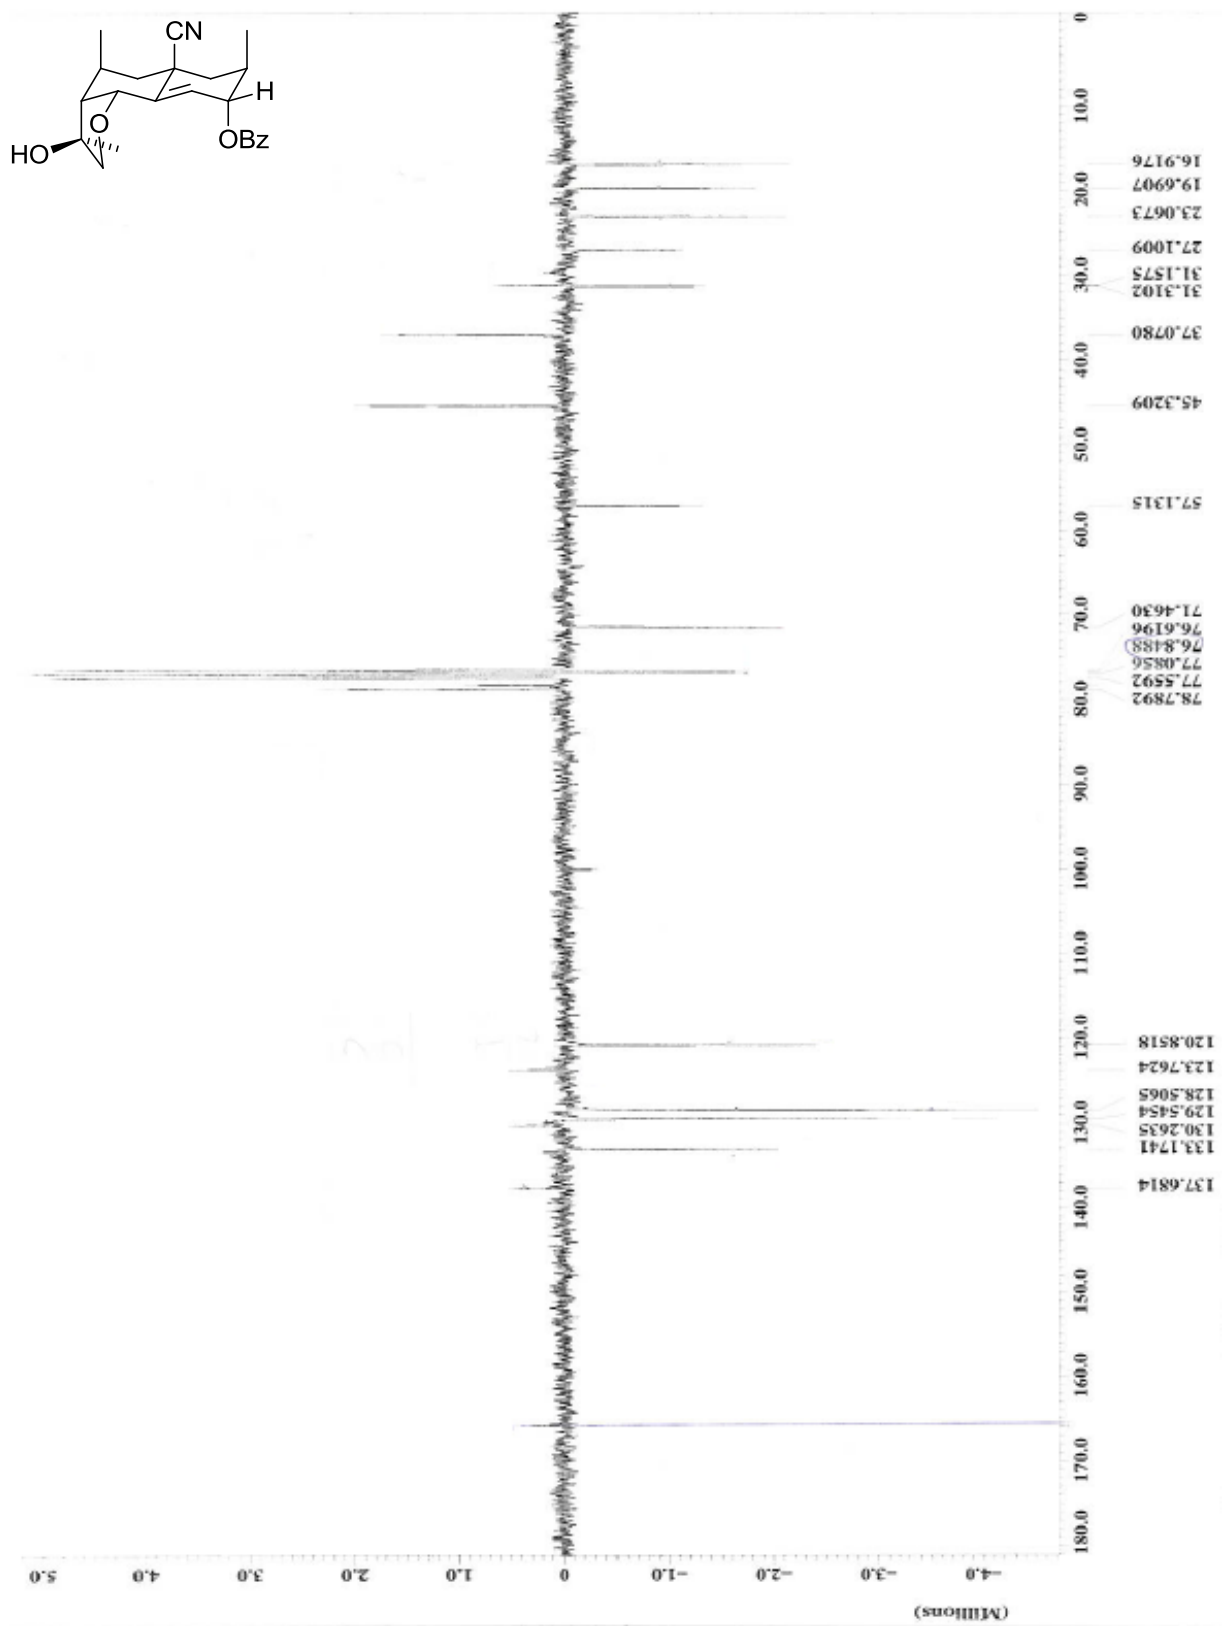

Methyl ester 18a – <sup>1</sup>H NMR (270 MHz)

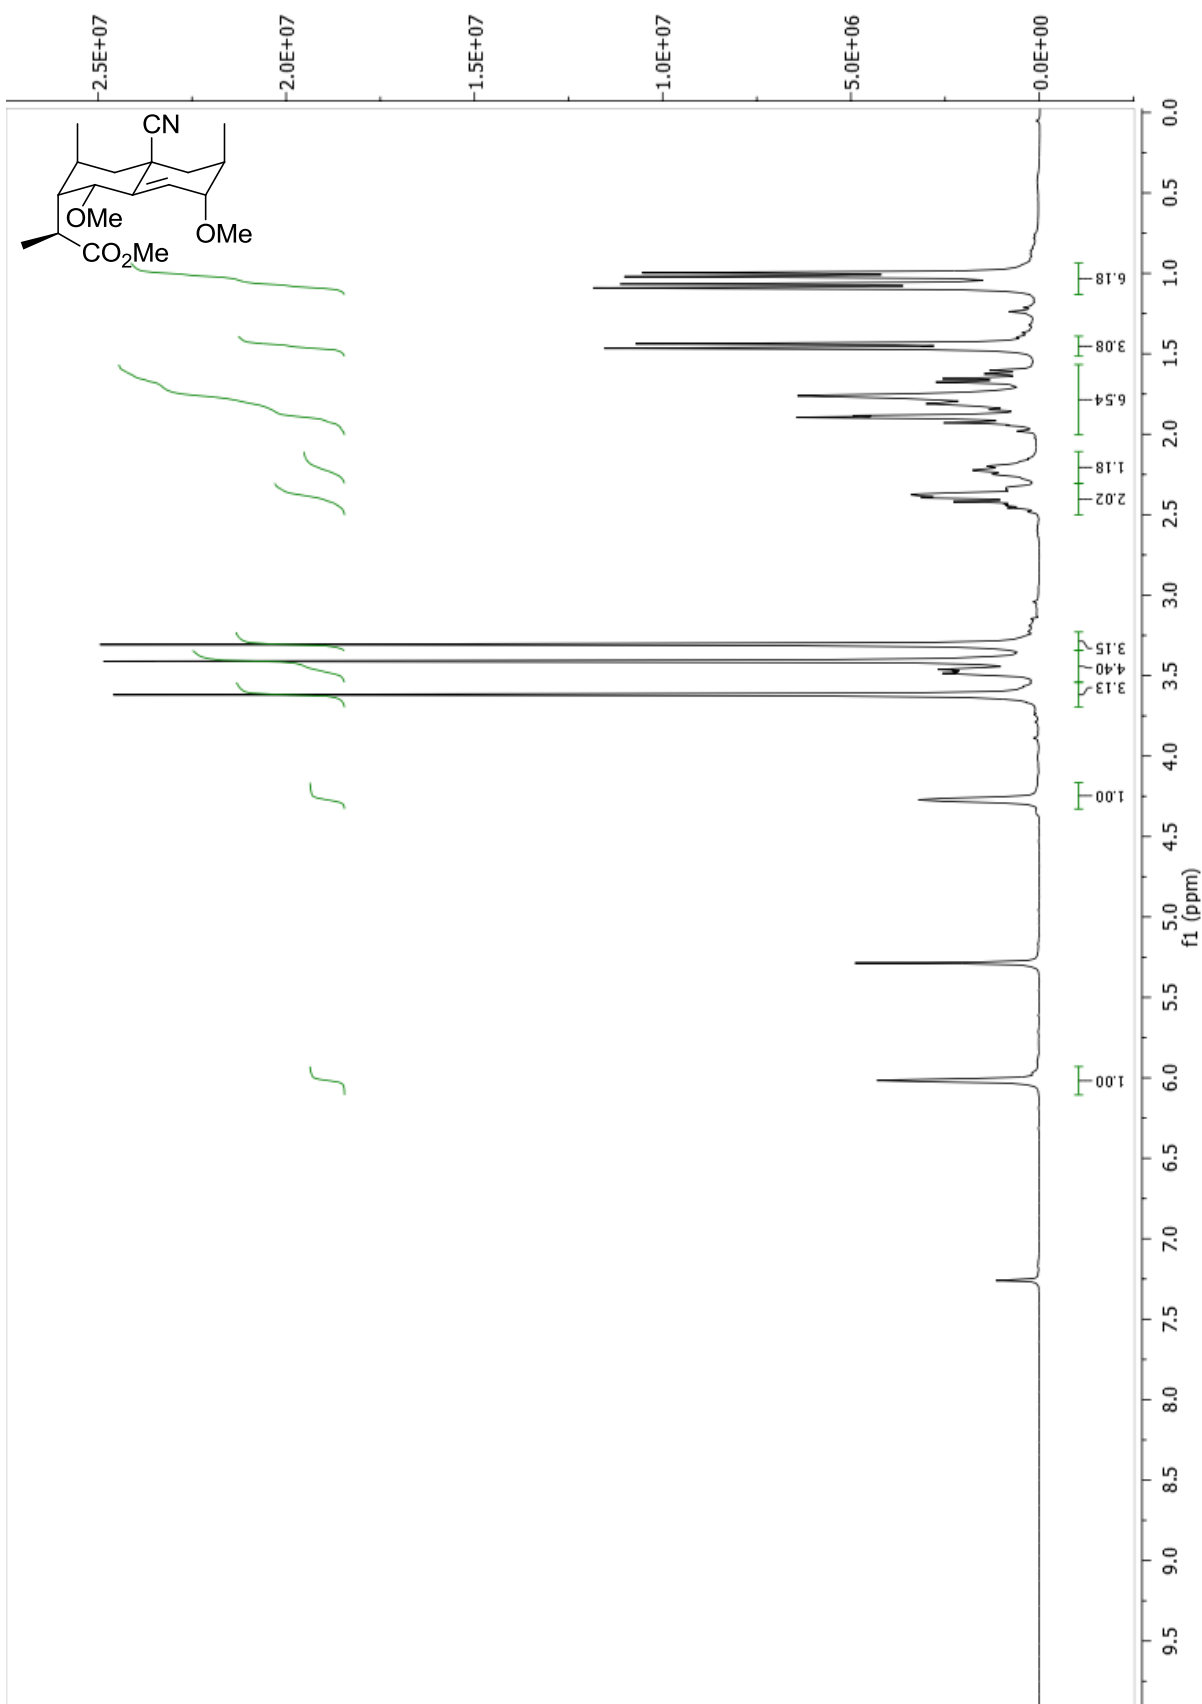

Methyl ester 18a – <sup>13</sup>C APT NMR (68 MHz)

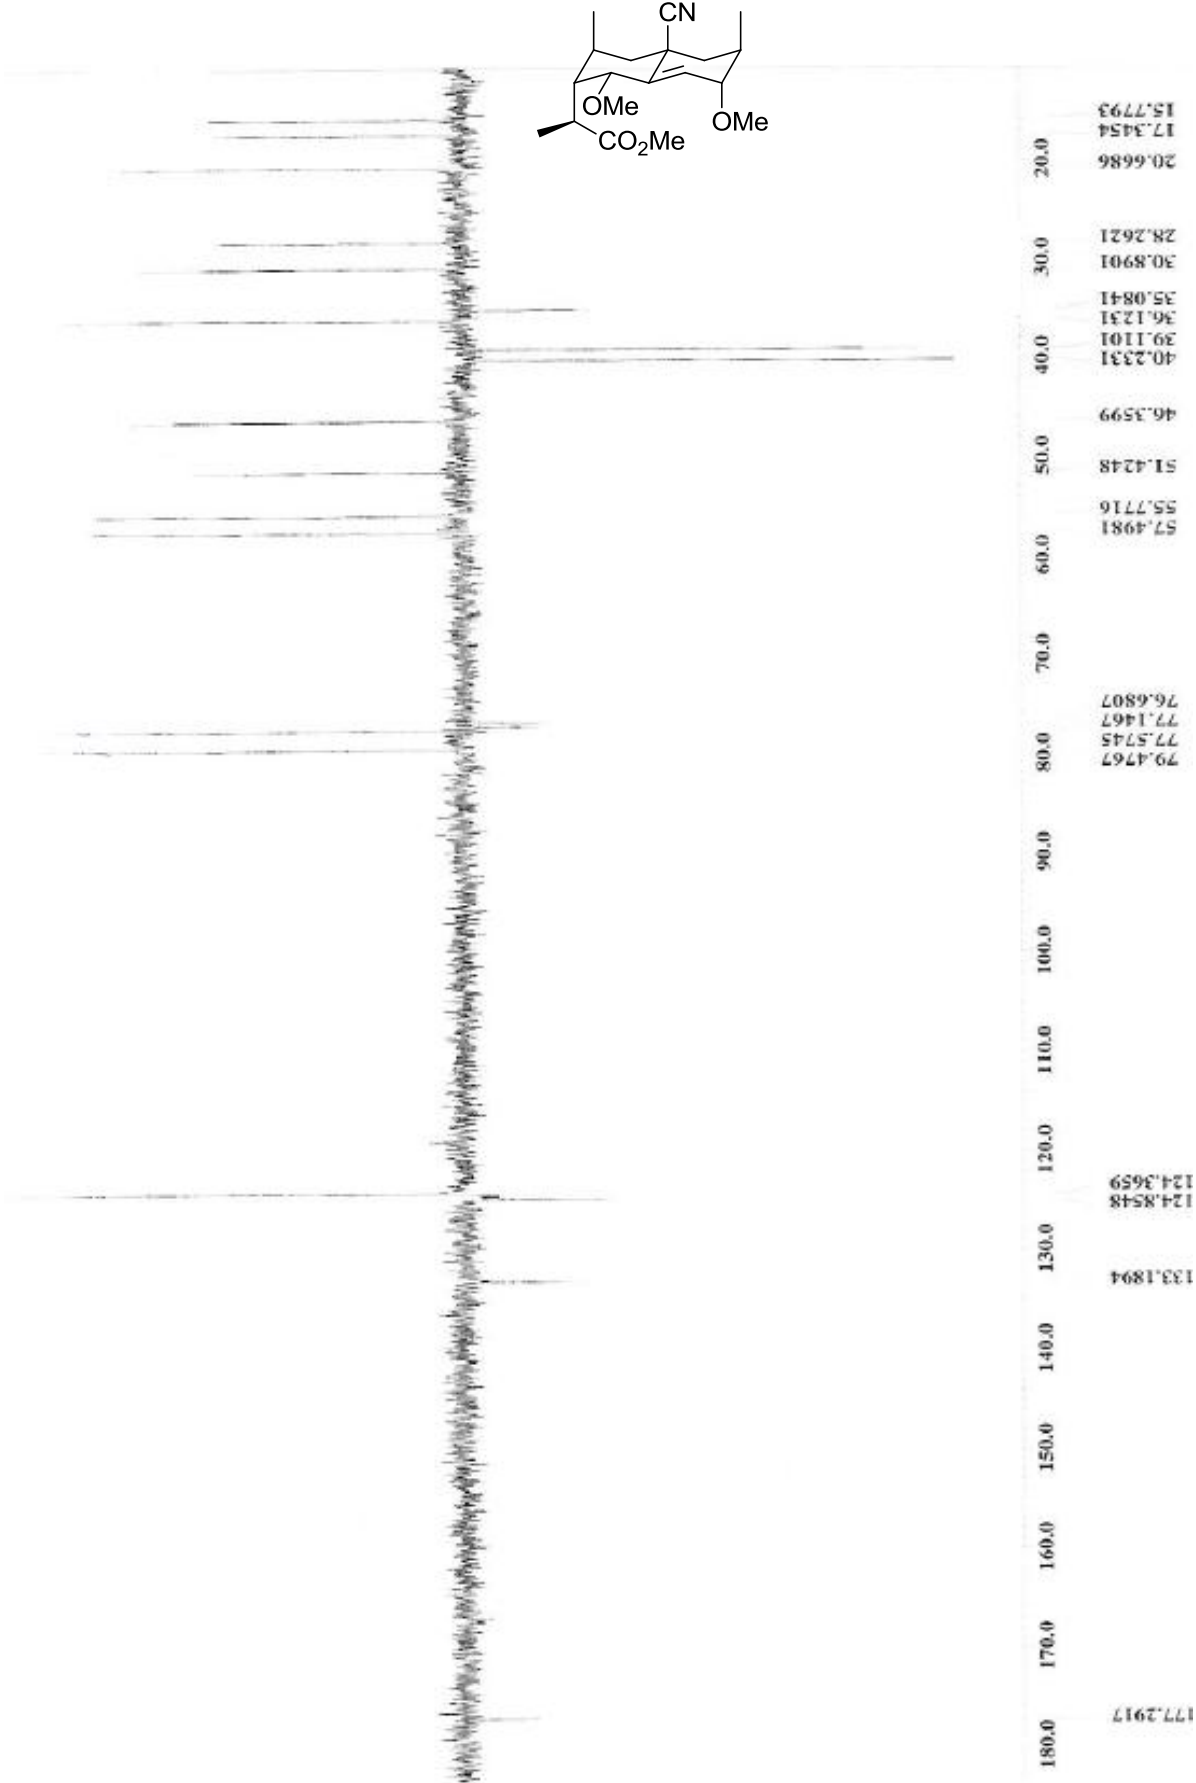

**Benzyl ester 18b – <sup>1</sup>H NMR (270 MHz)**

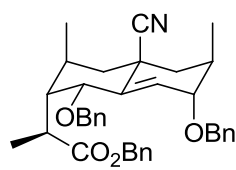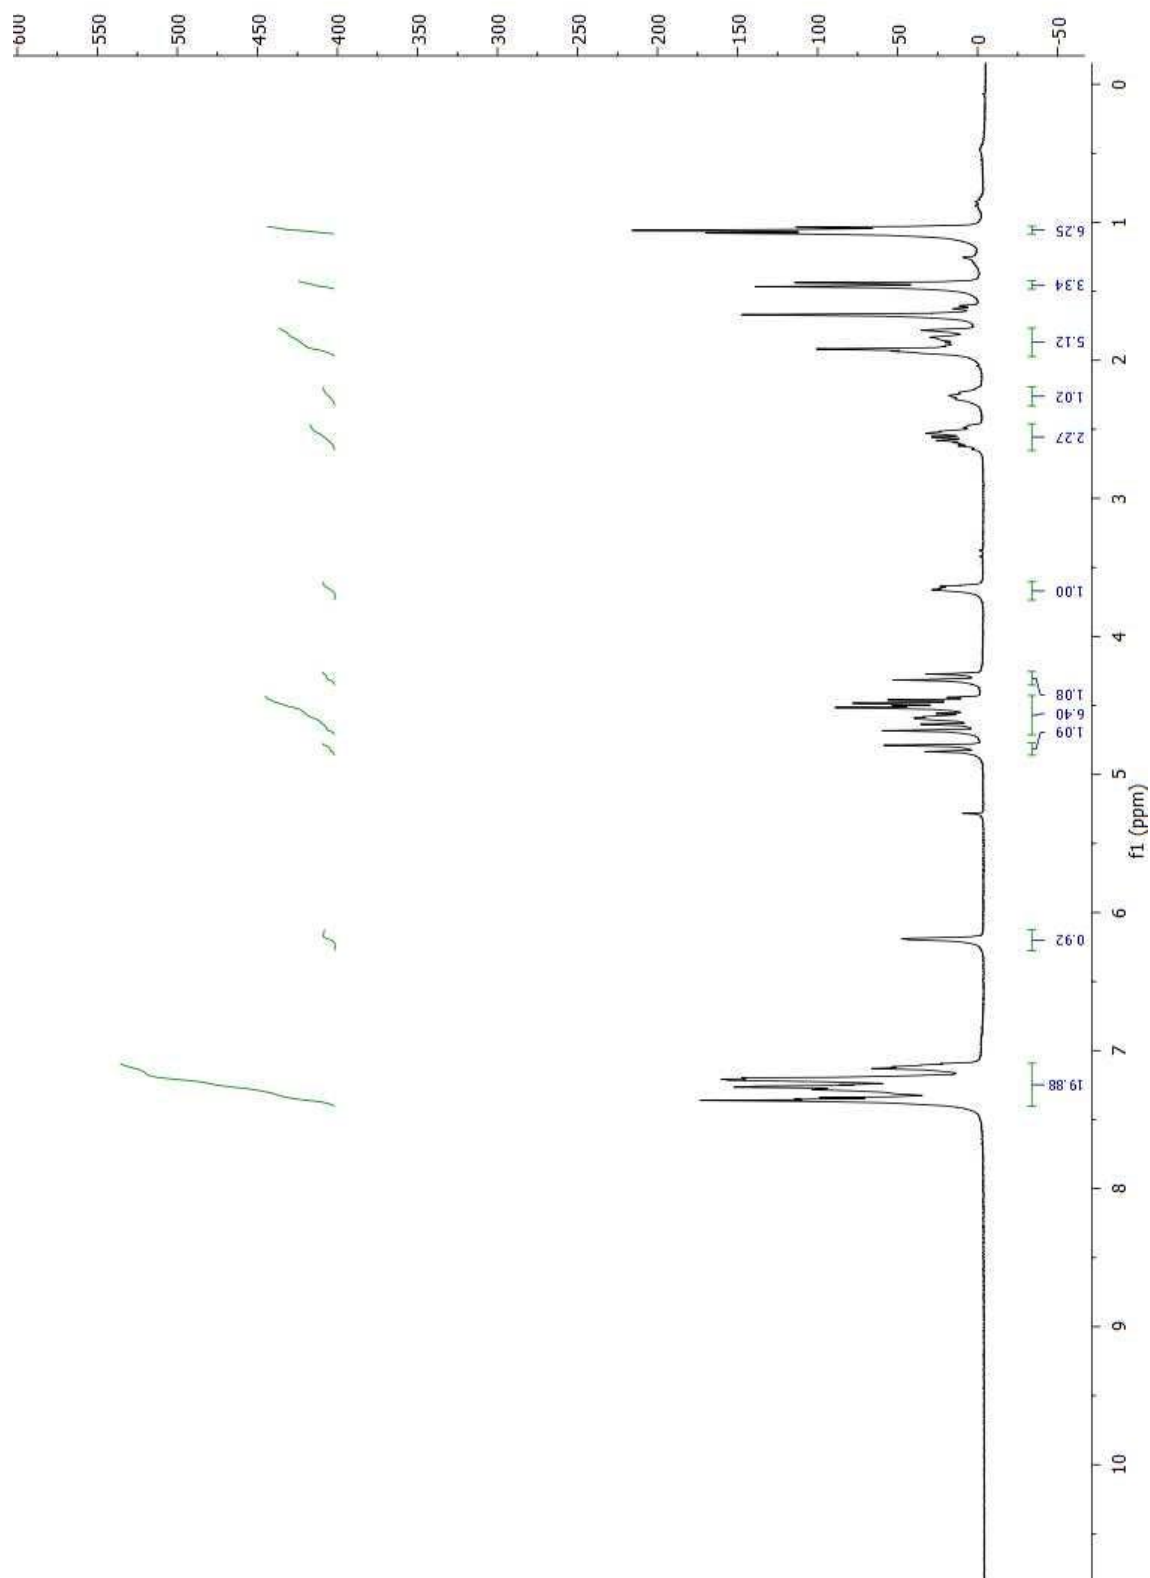

Benzyl ester 18b – <sup>13</sup>C APT NMR (75 MHz)

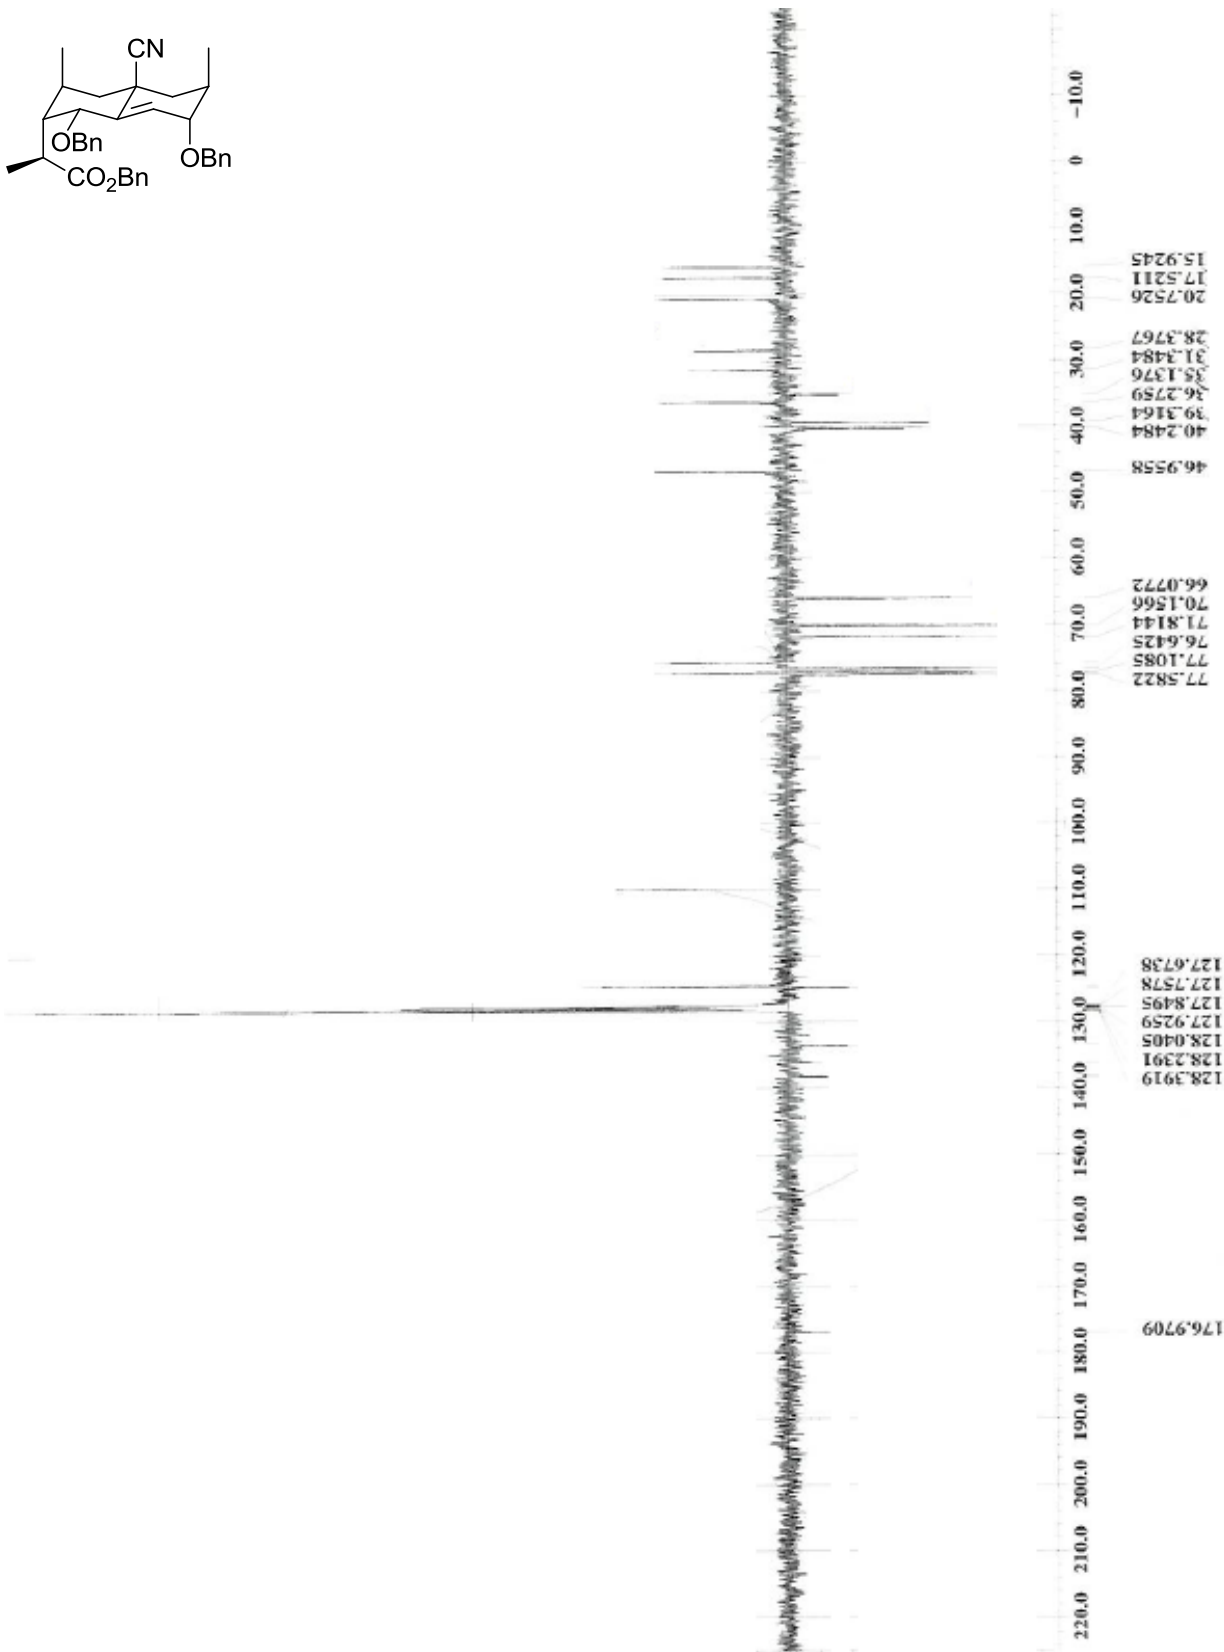

**PMB ester 18c –  $^1\text{H}$  NMR (270 MHz)**

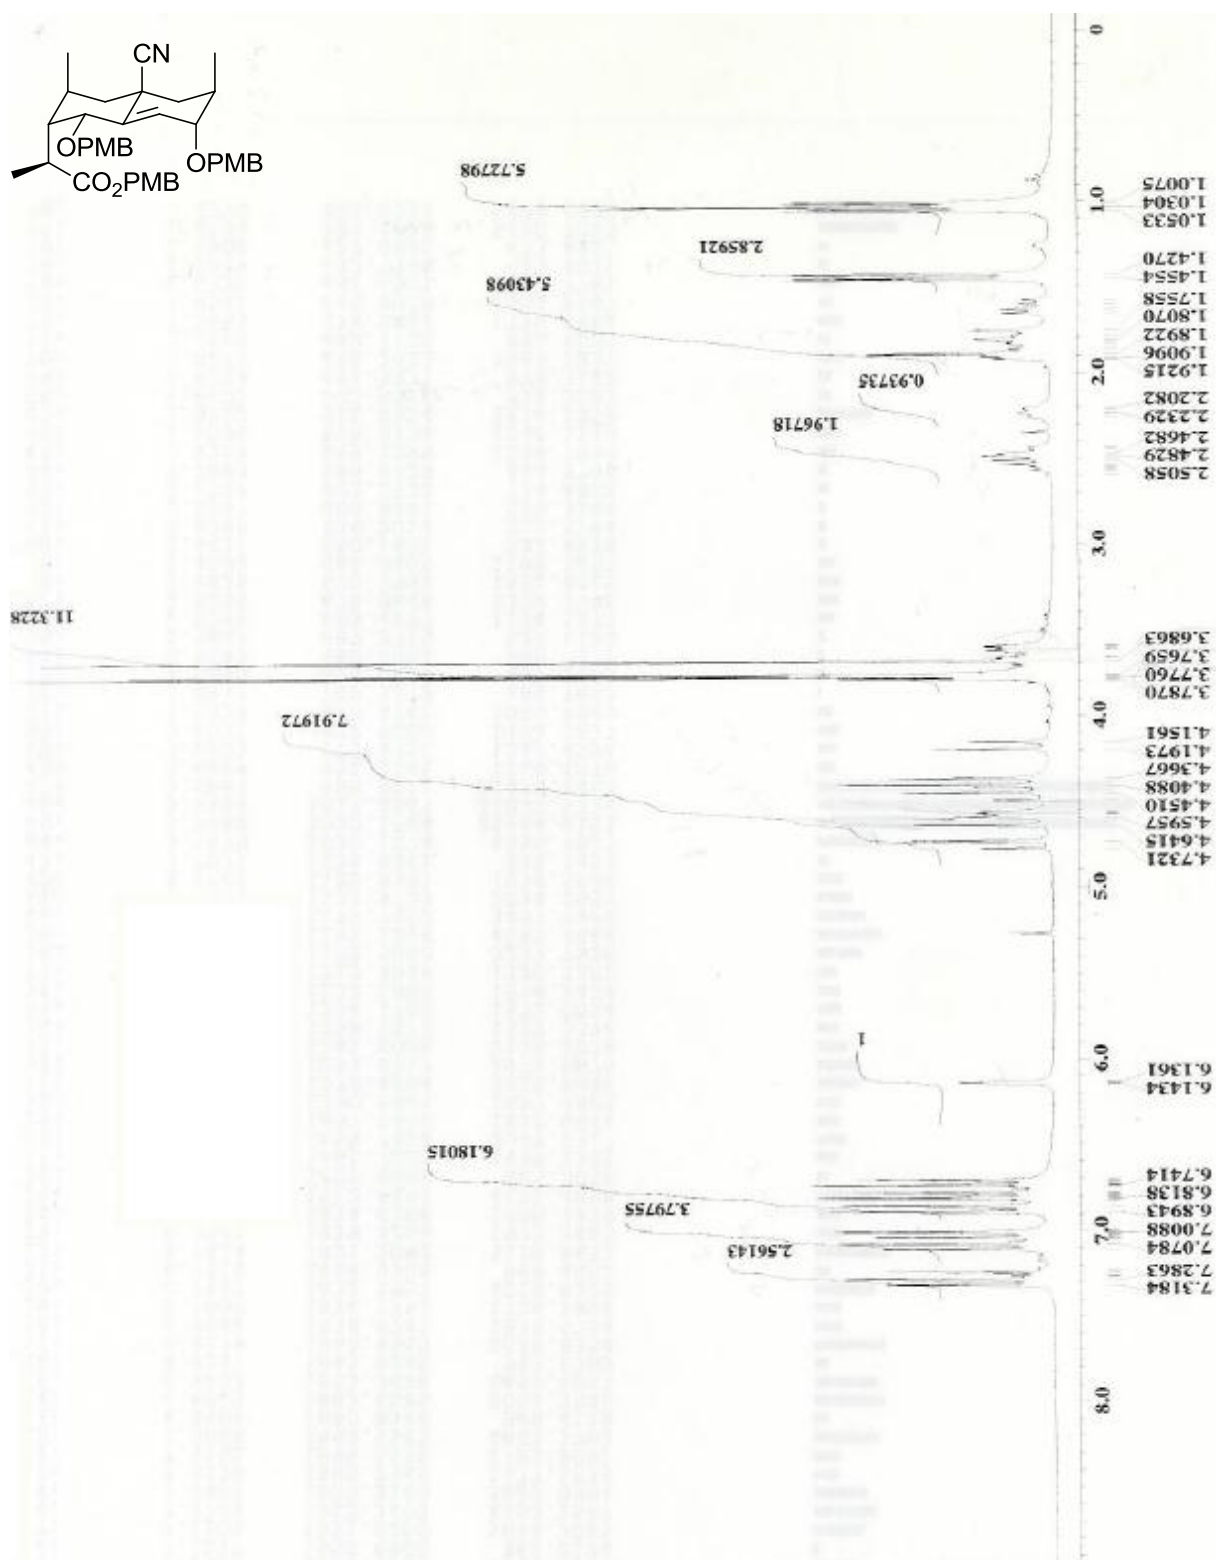

# PMB ester 18c – $^{13}\text{C}$ APT NMR (100 MHz)

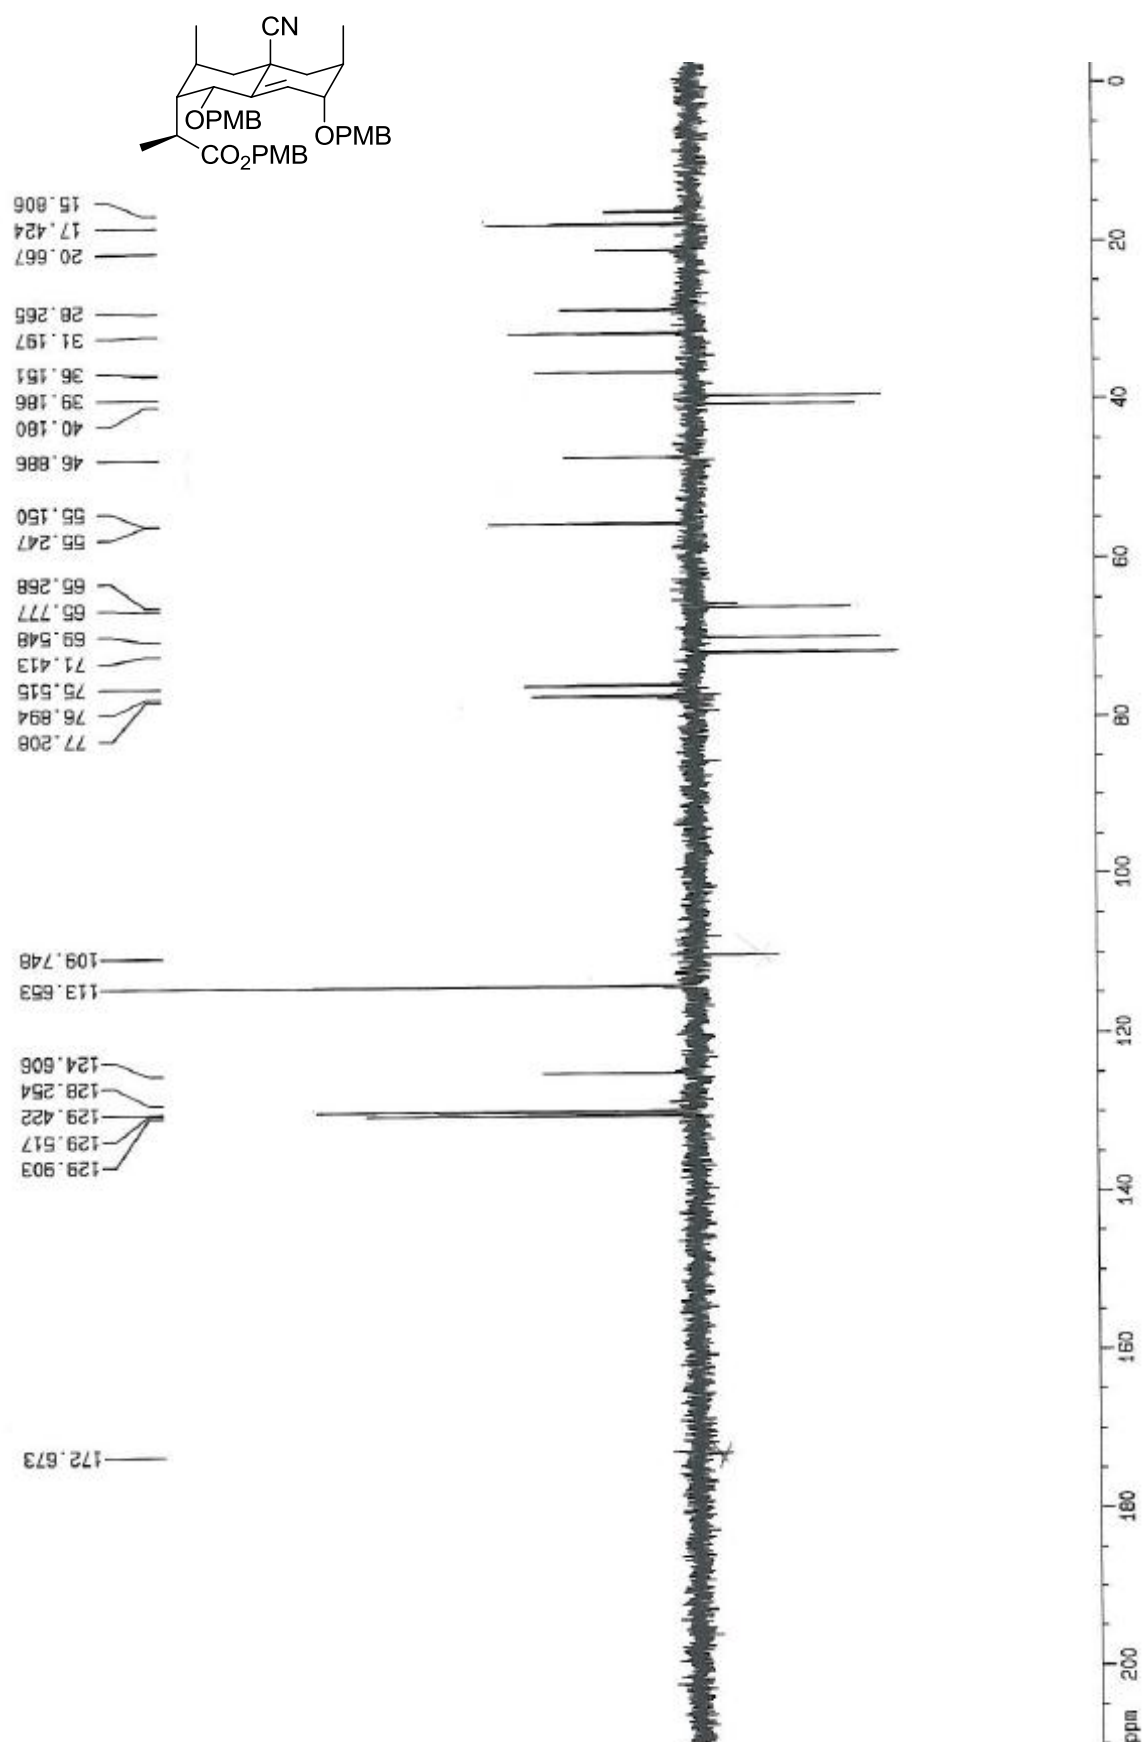



Triol 19 – <sup>1</sup>H NMR (250 MHz)

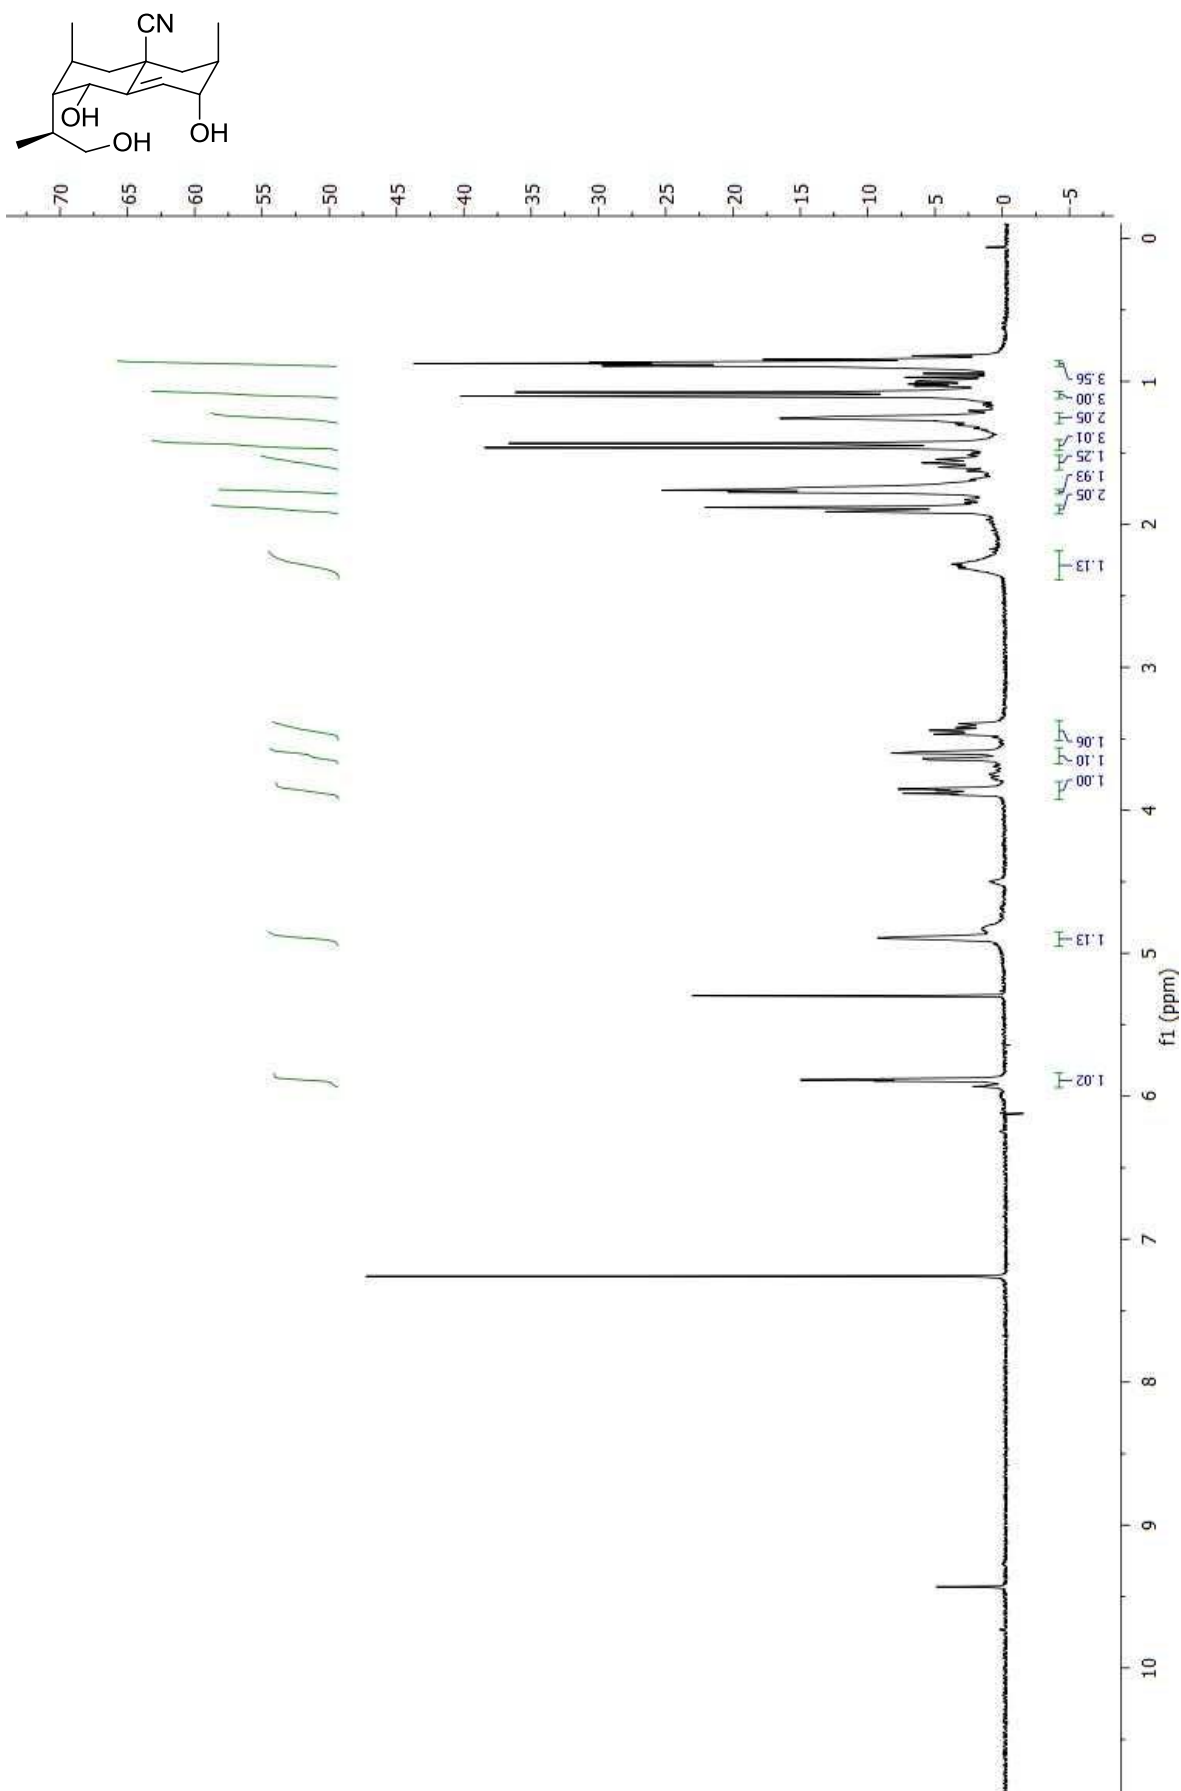

Triol 19 – <sup>13</sup>C APT NMR (63 MHz)

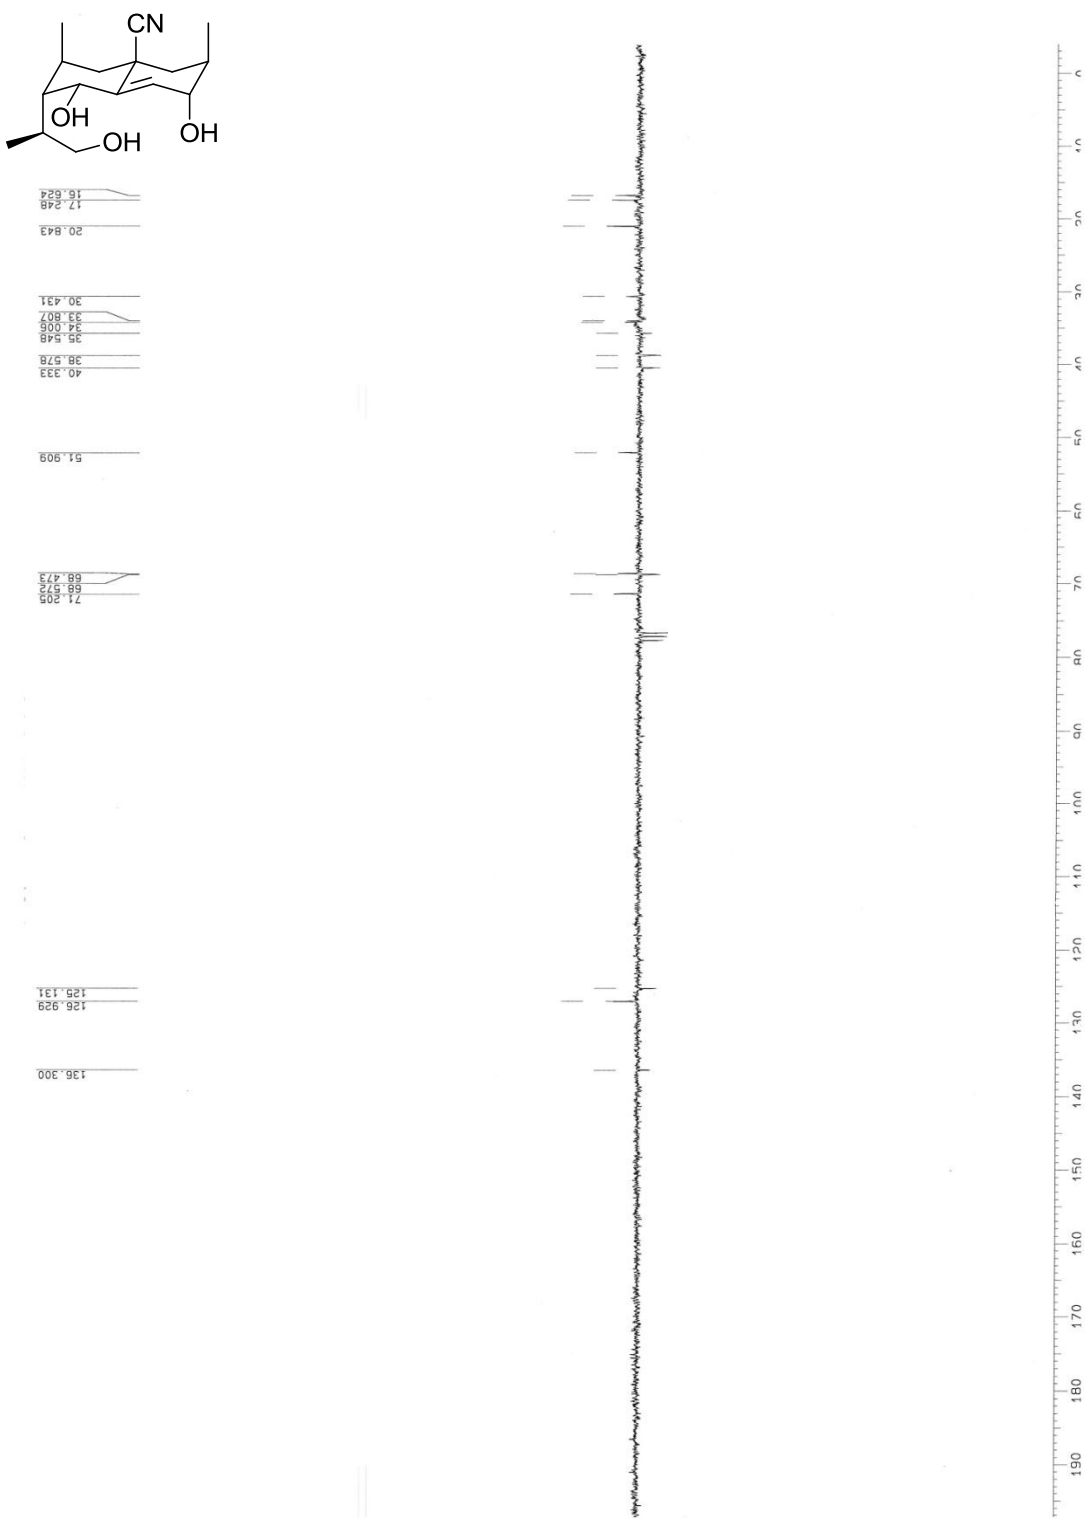

Dimethyl ether alcohol 19a – <sup>1</sup>H NMR (270 MHz)

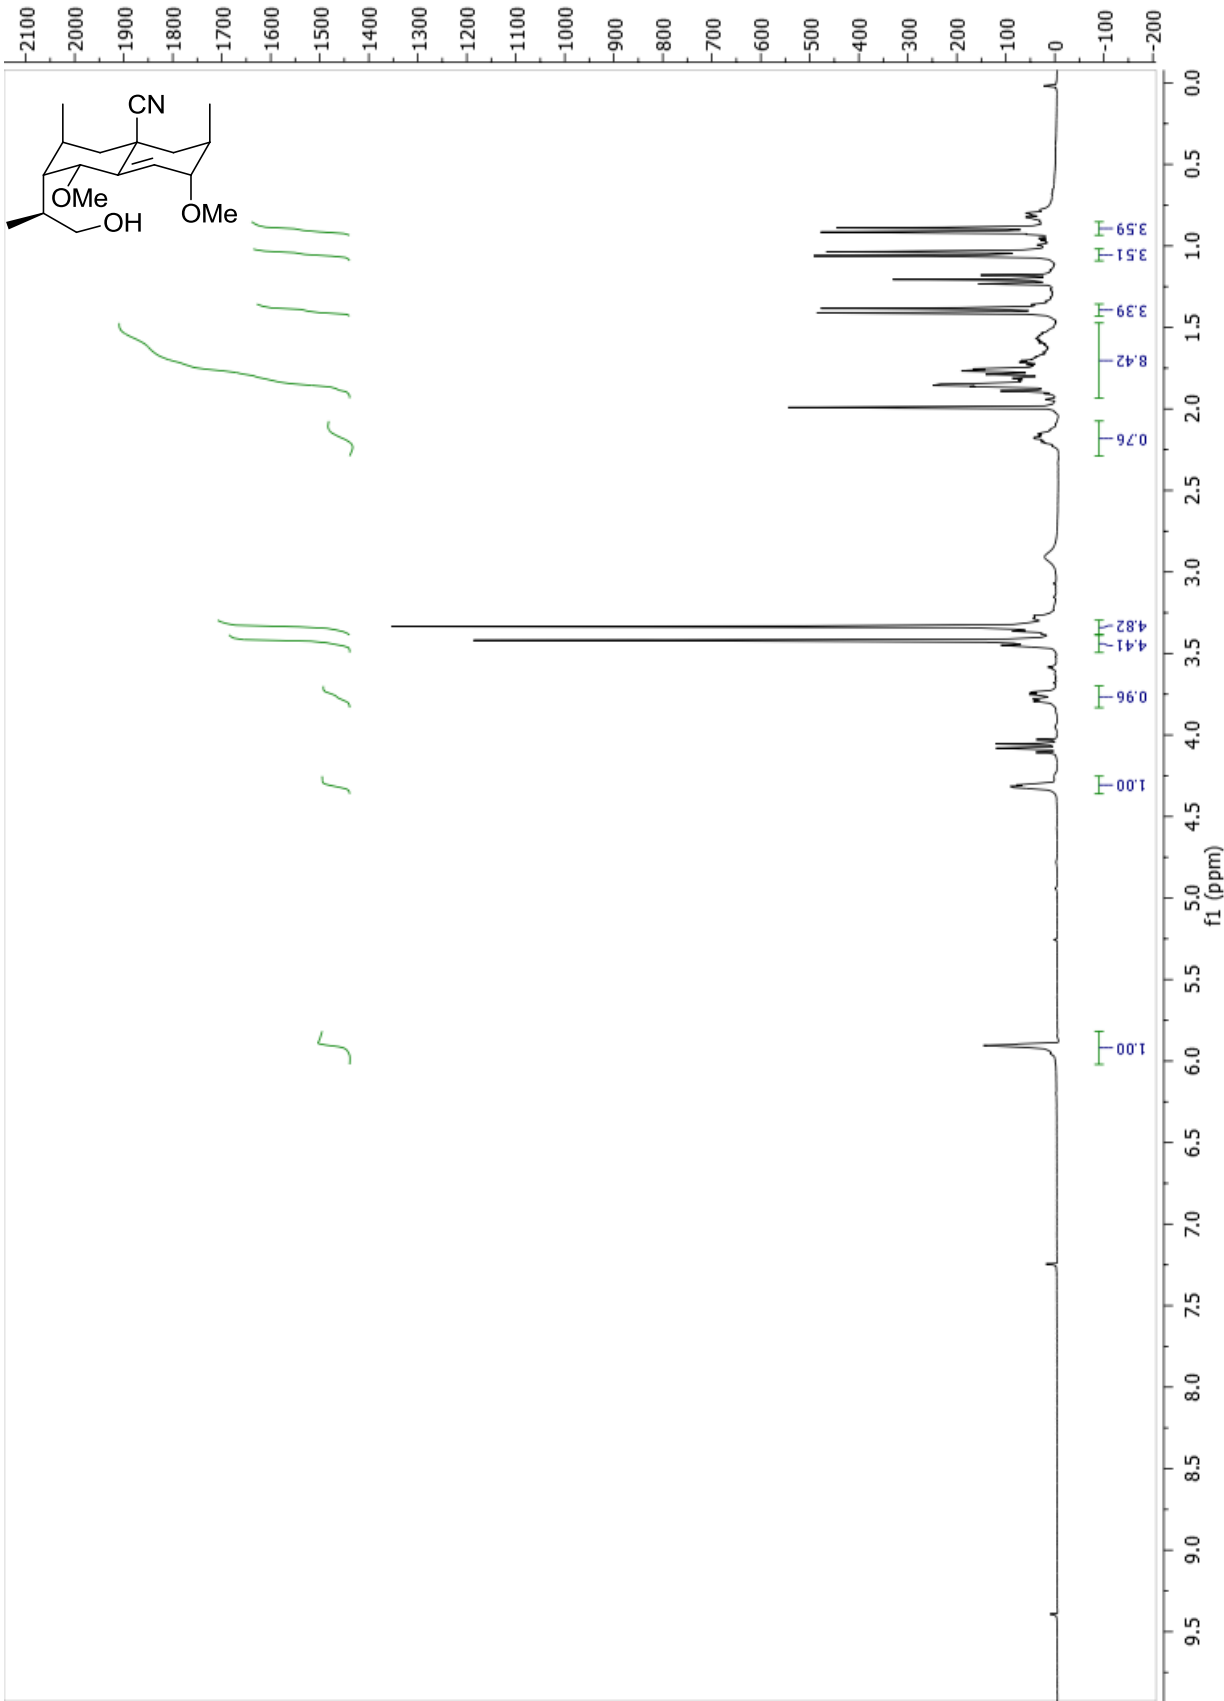

Dimethyl ether alcohol 19a – <sup>13</sup>C APT NMR (68 MHz)

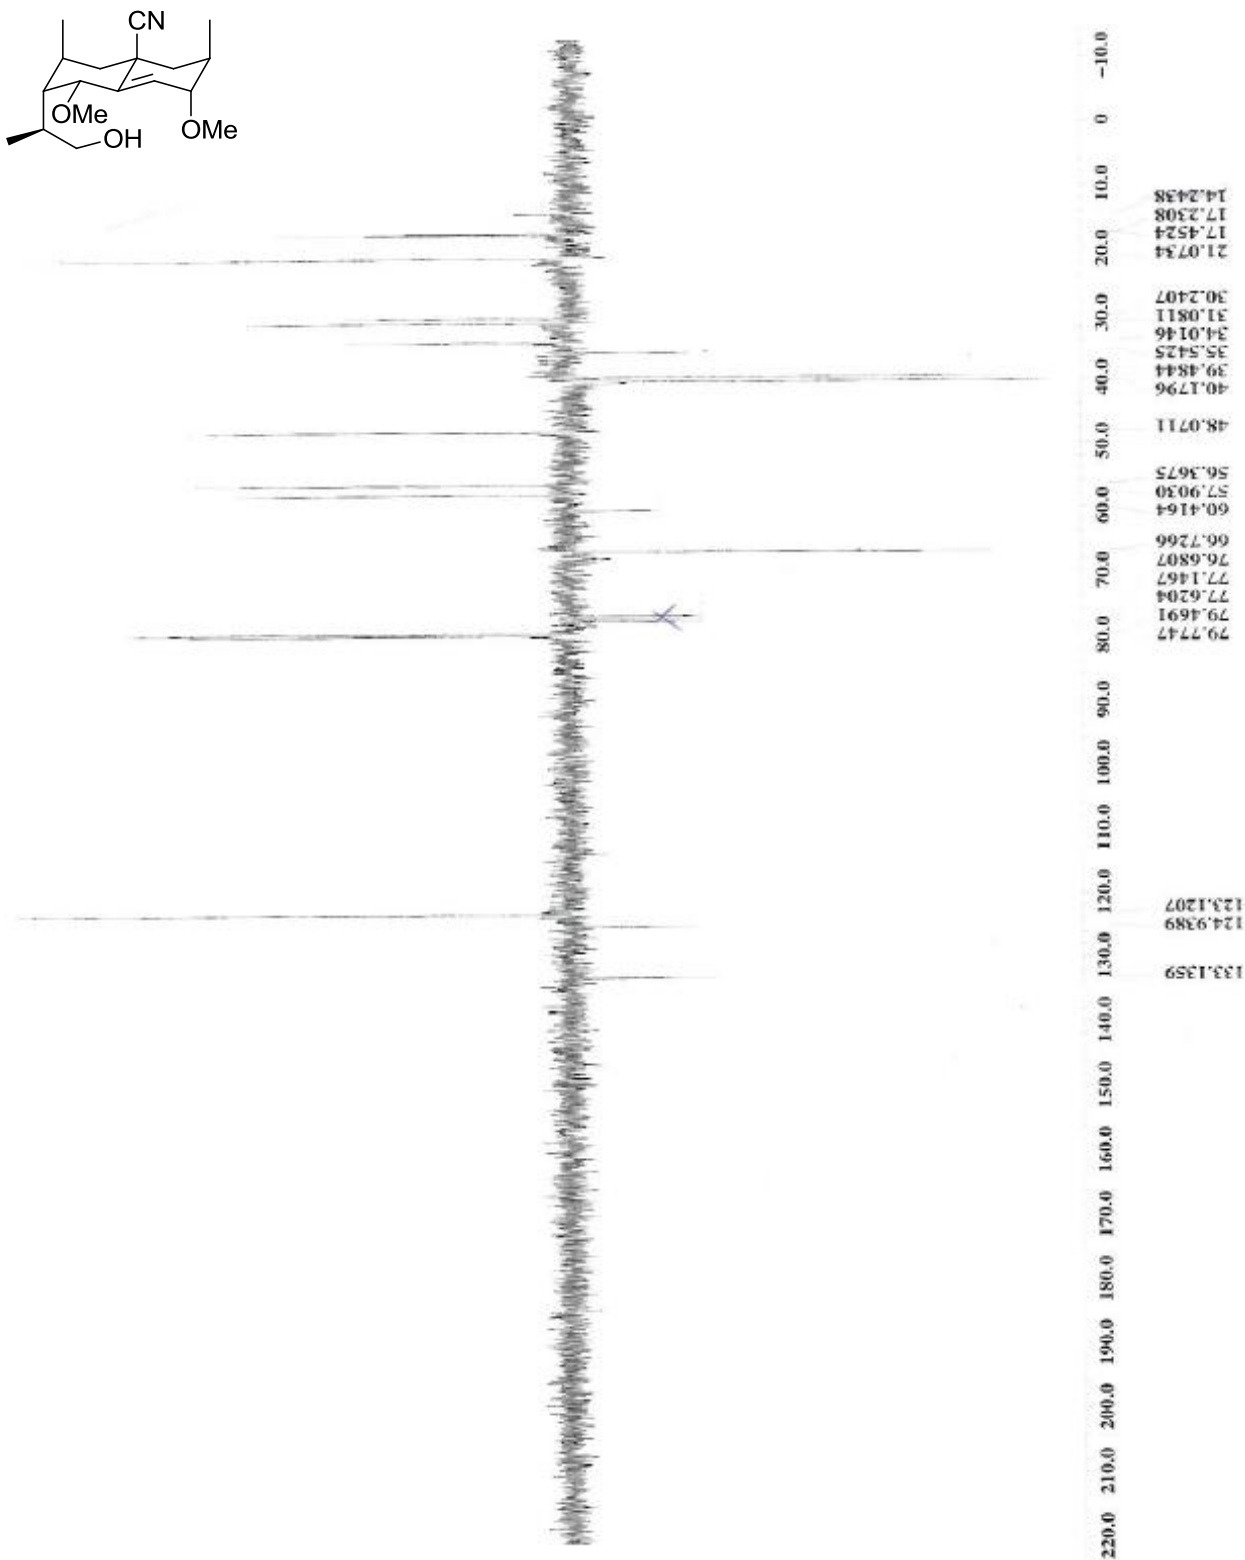

Dibenzyl ether alcohol 19b – <sup>1</sup>H NMR (300 MHz)

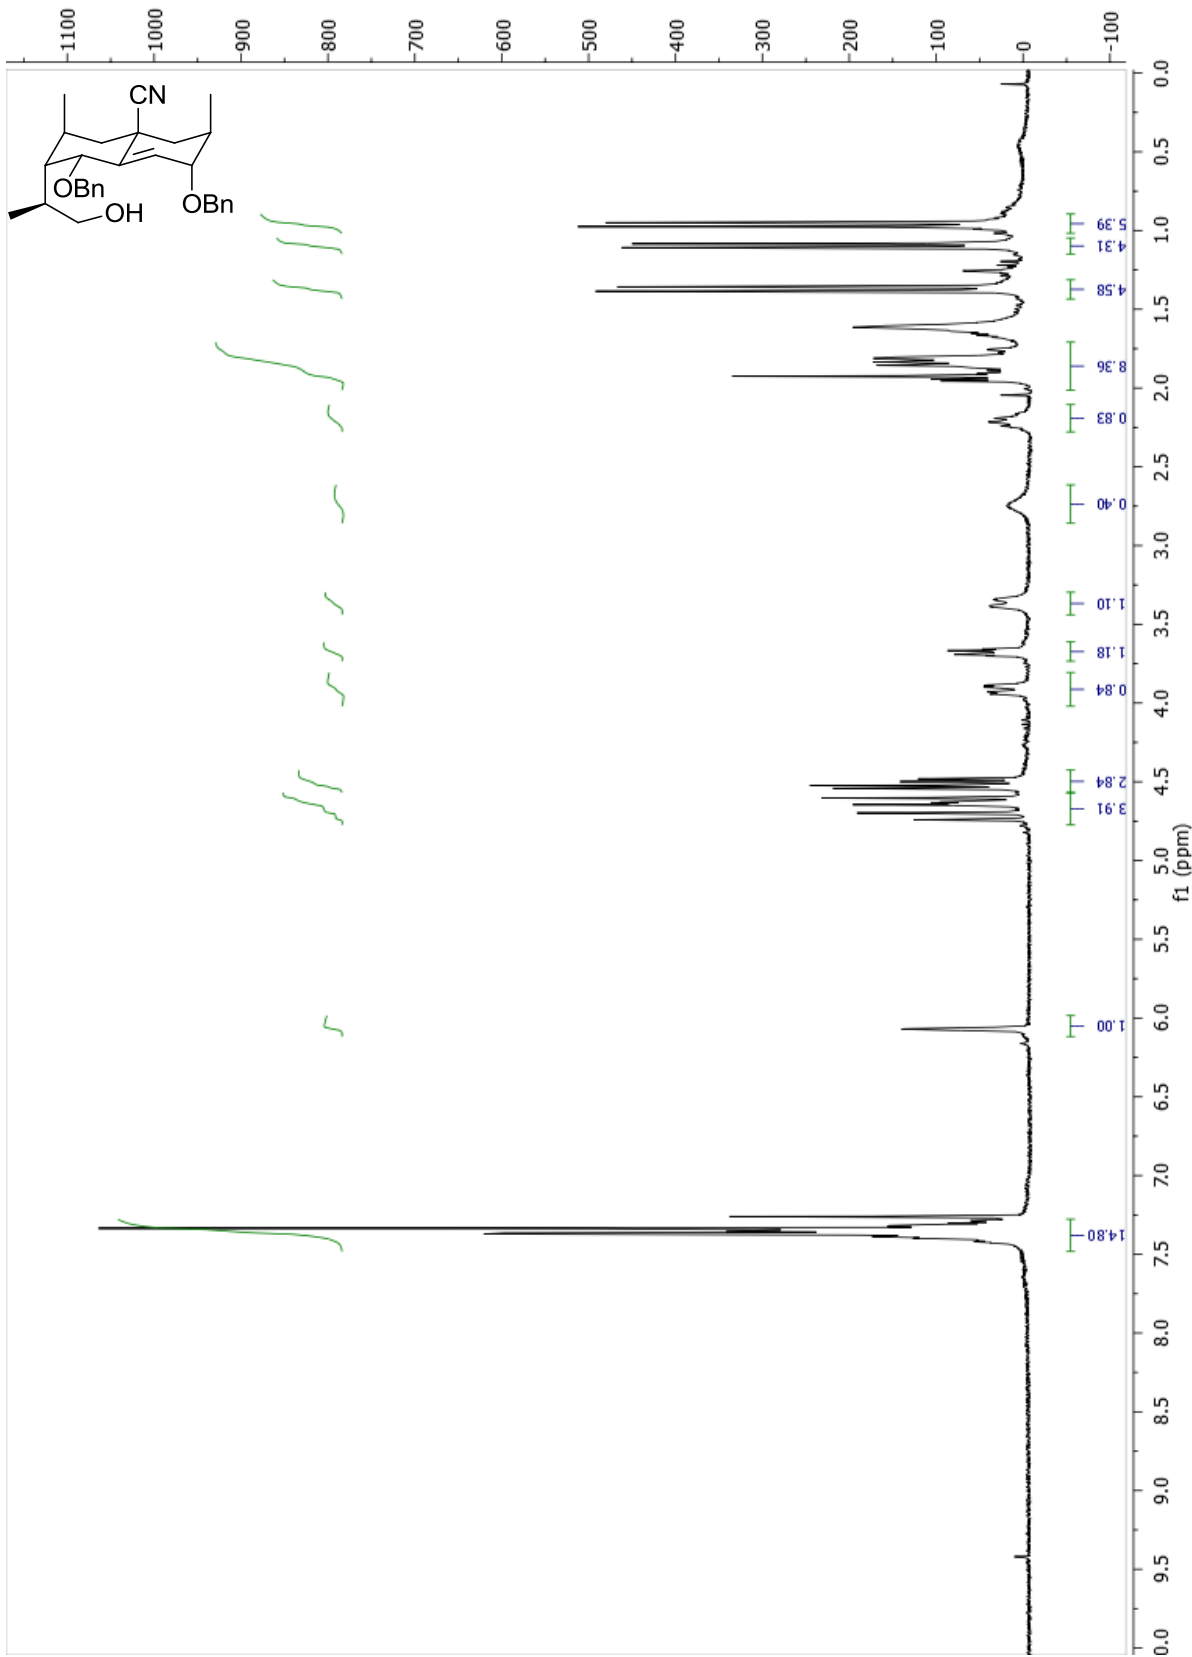

Dibenzyl ether alcohol 19b – <sup>13</sup>C APT NMR (75 MHz)

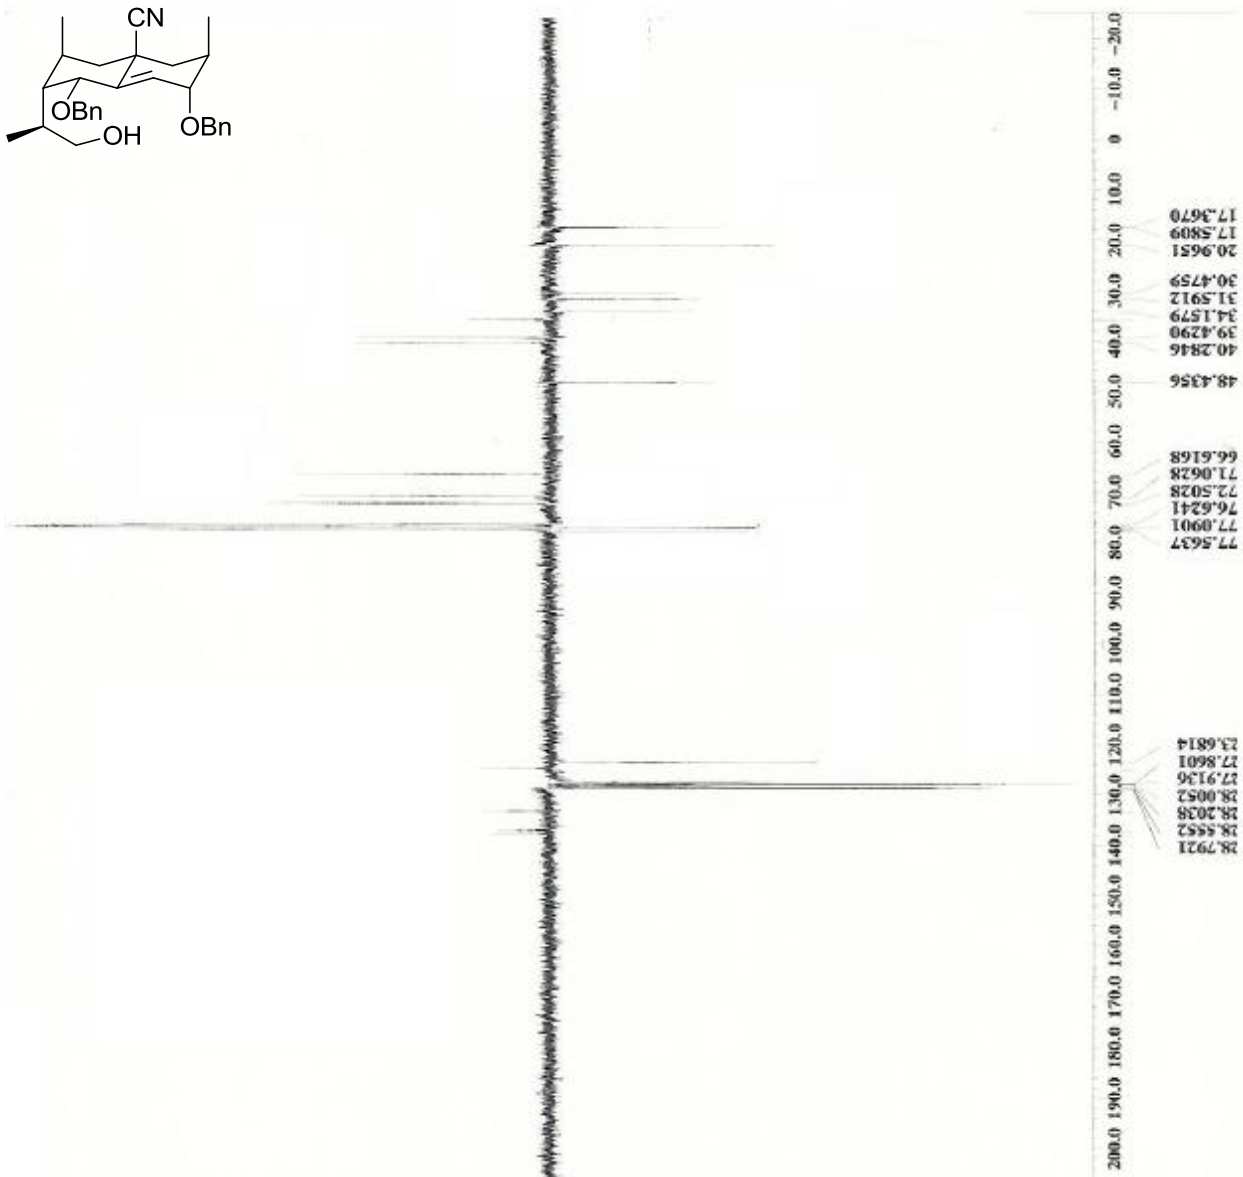

Di-PMB ether alcohol 19c – <sup>1</sup>H NMR (270 MHz)

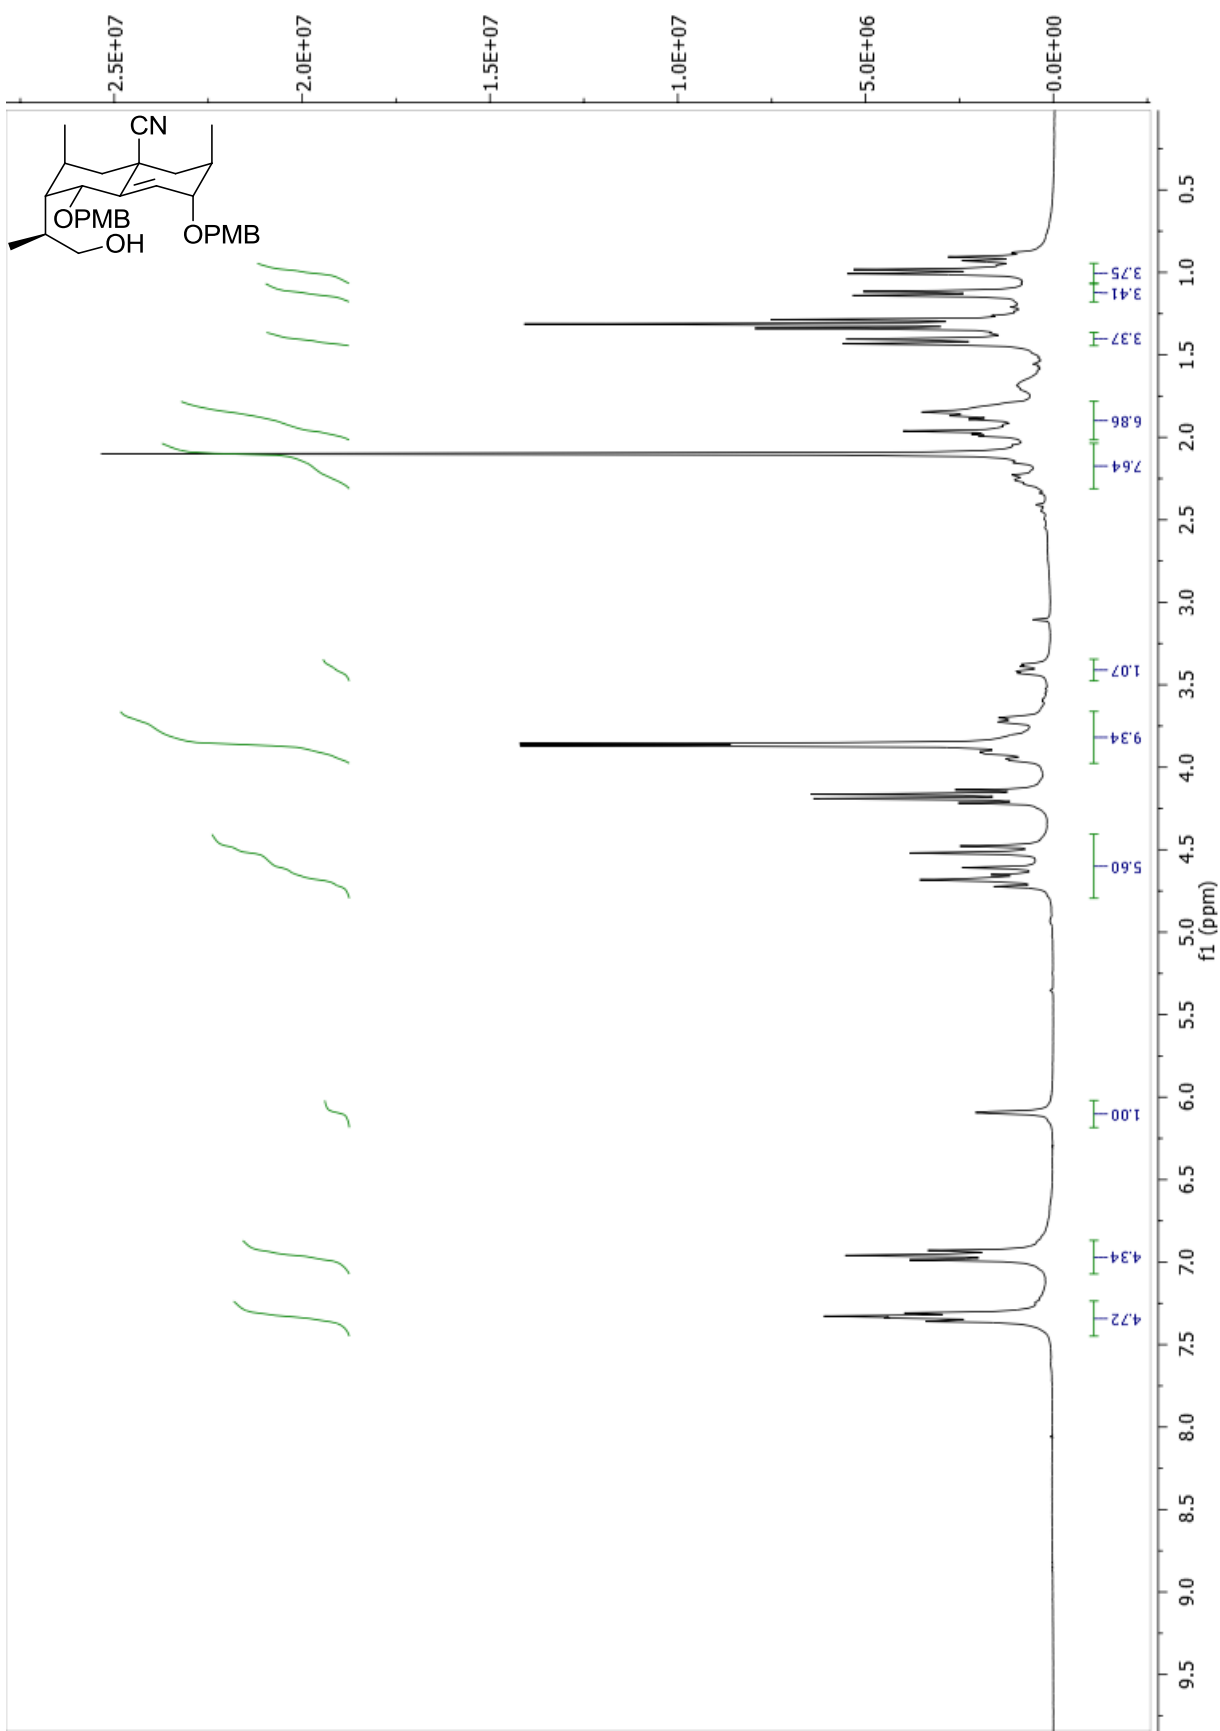

Di-PMB ether alcohol 19c –  $^{13}\text{C}$  APT NMR (68 MHz)

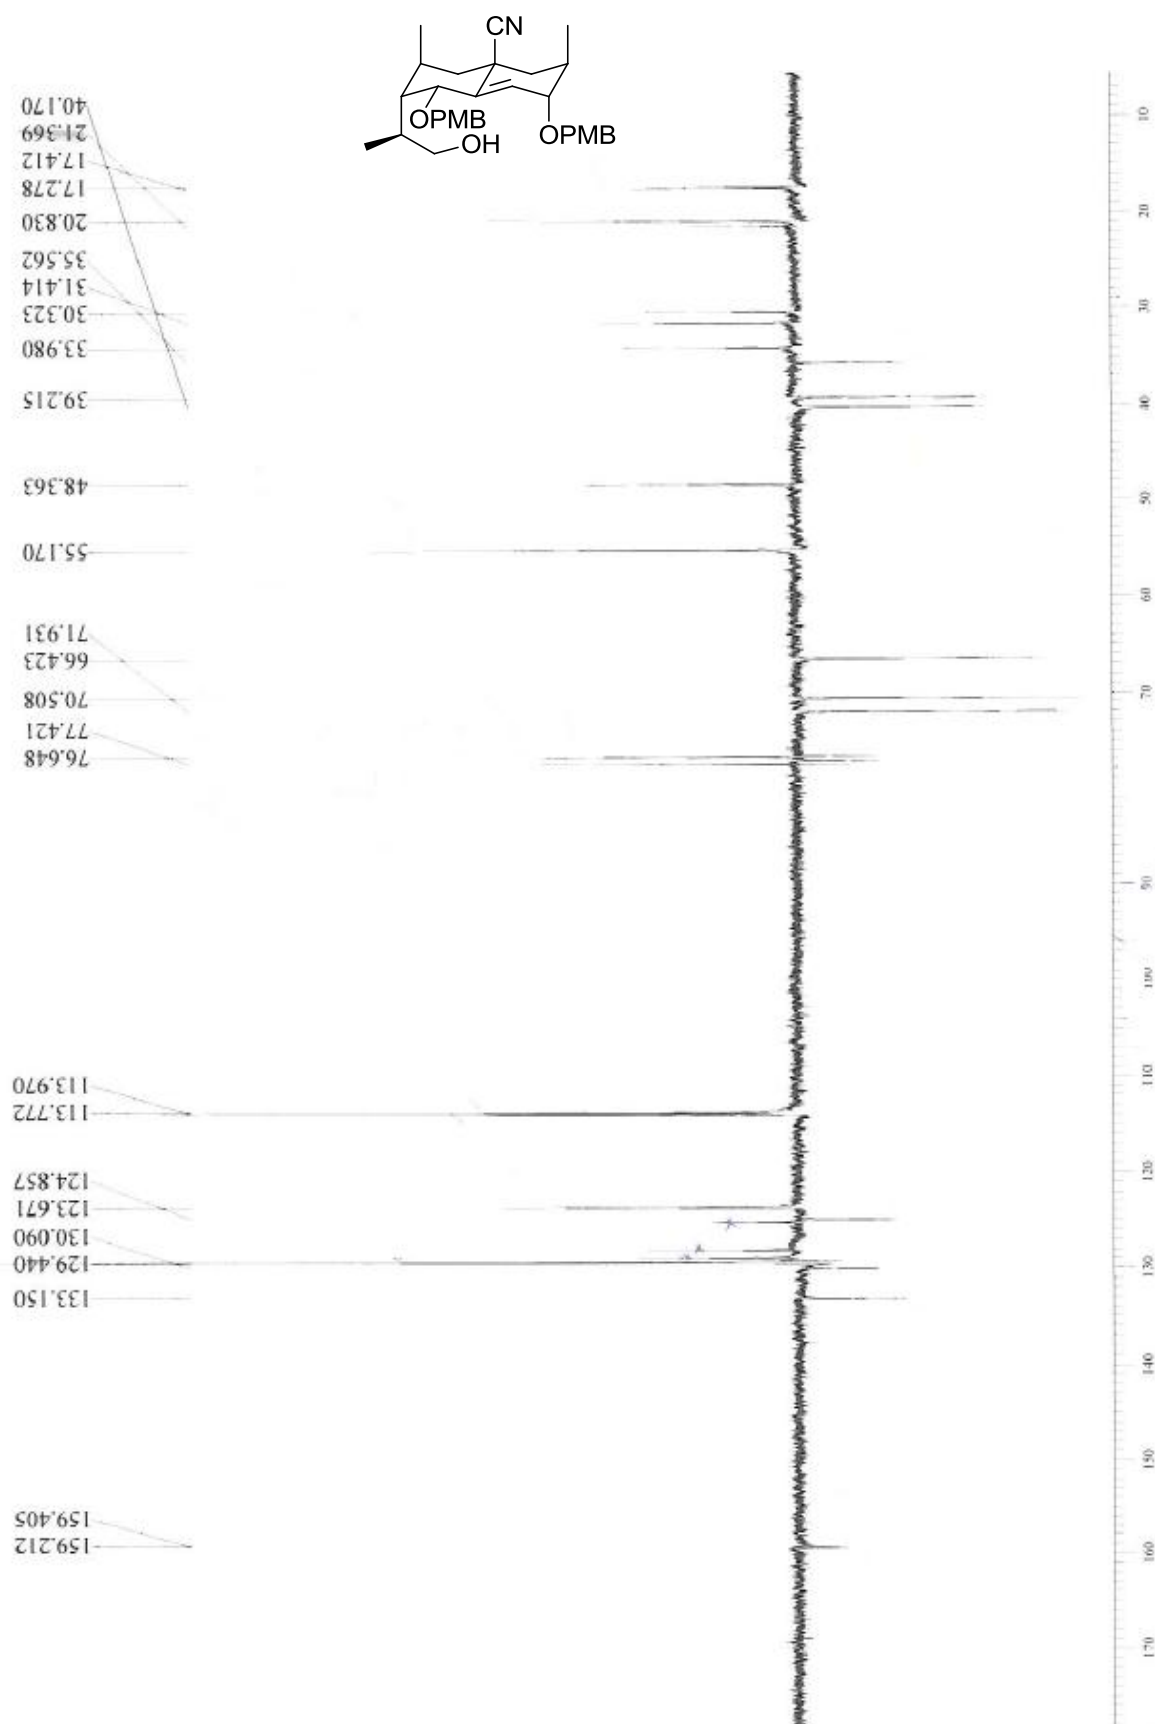



Tetrahydrofuran methyl ether 20a – <sup>1</sup>H NMR (270 MHz)

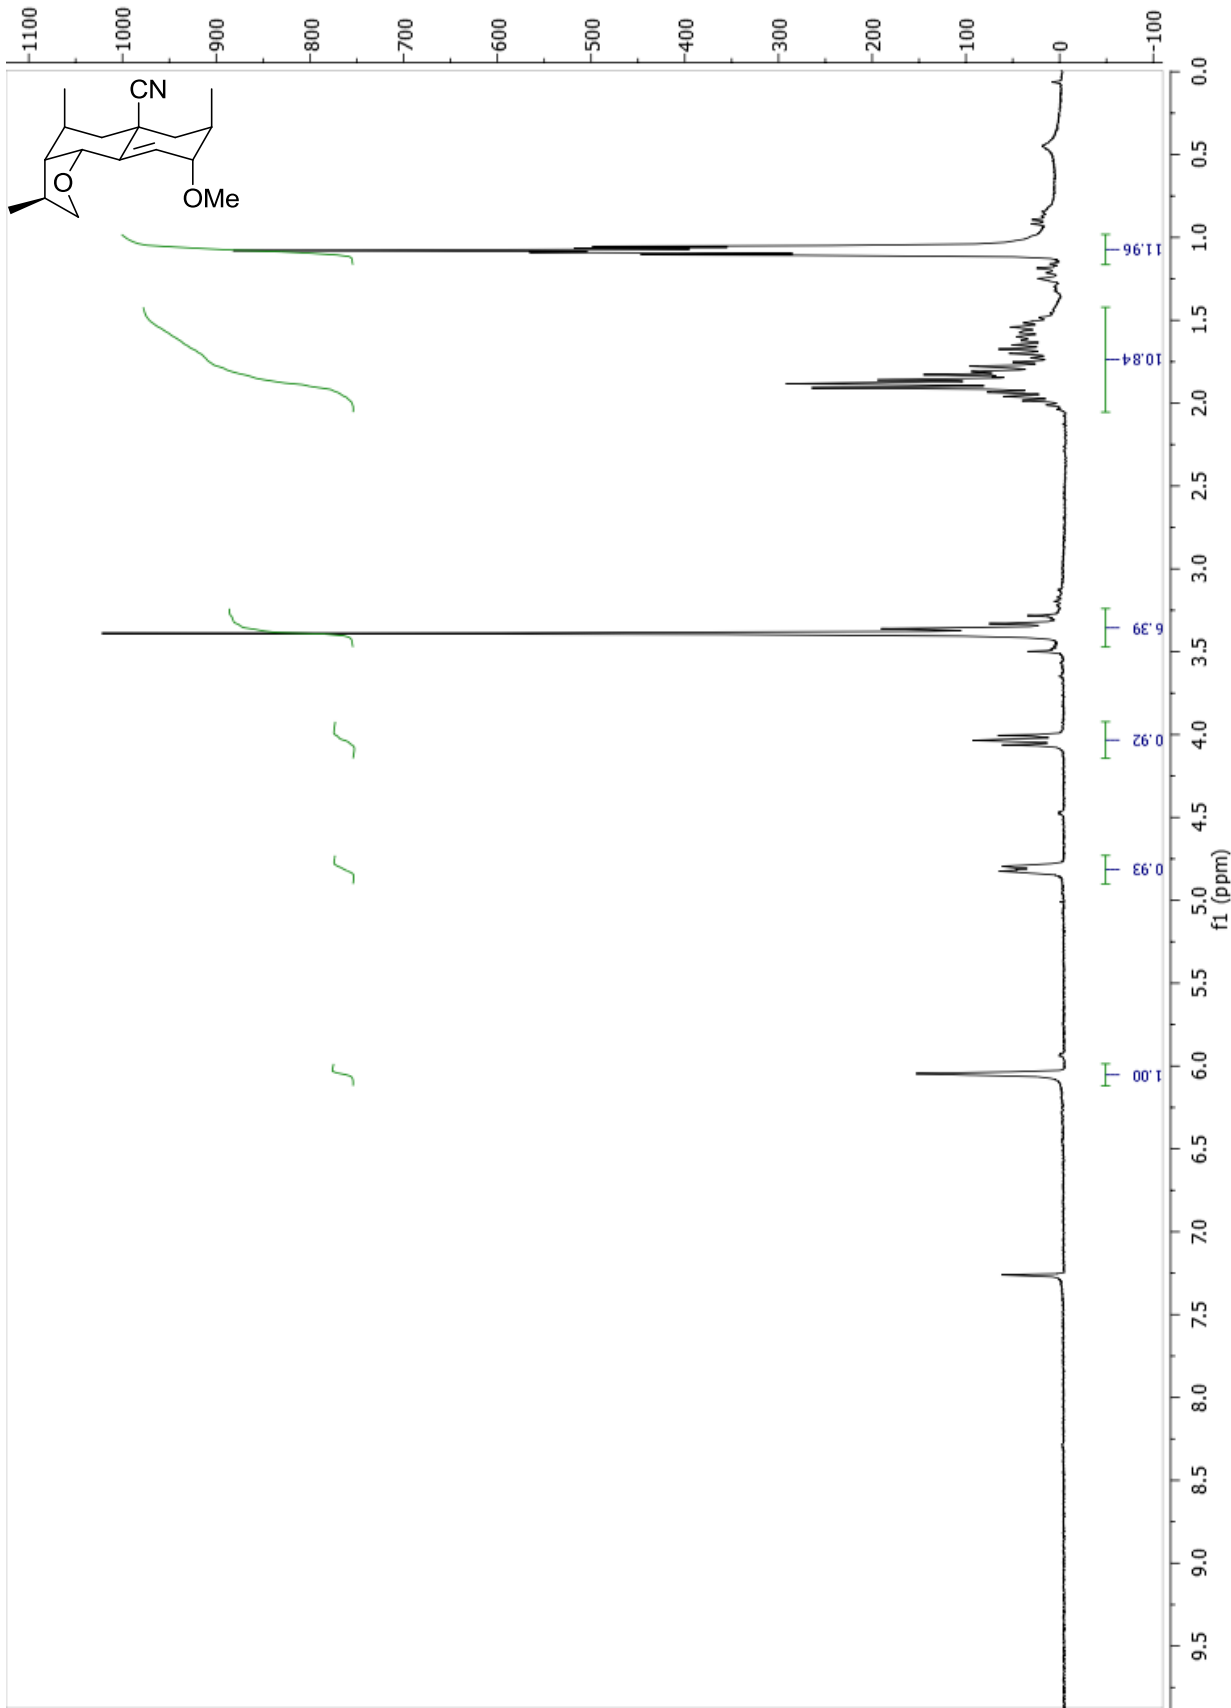



Tetrahydrofuran benzyl ether 20b – <sup>1</sup>H NMR (270 MHz)

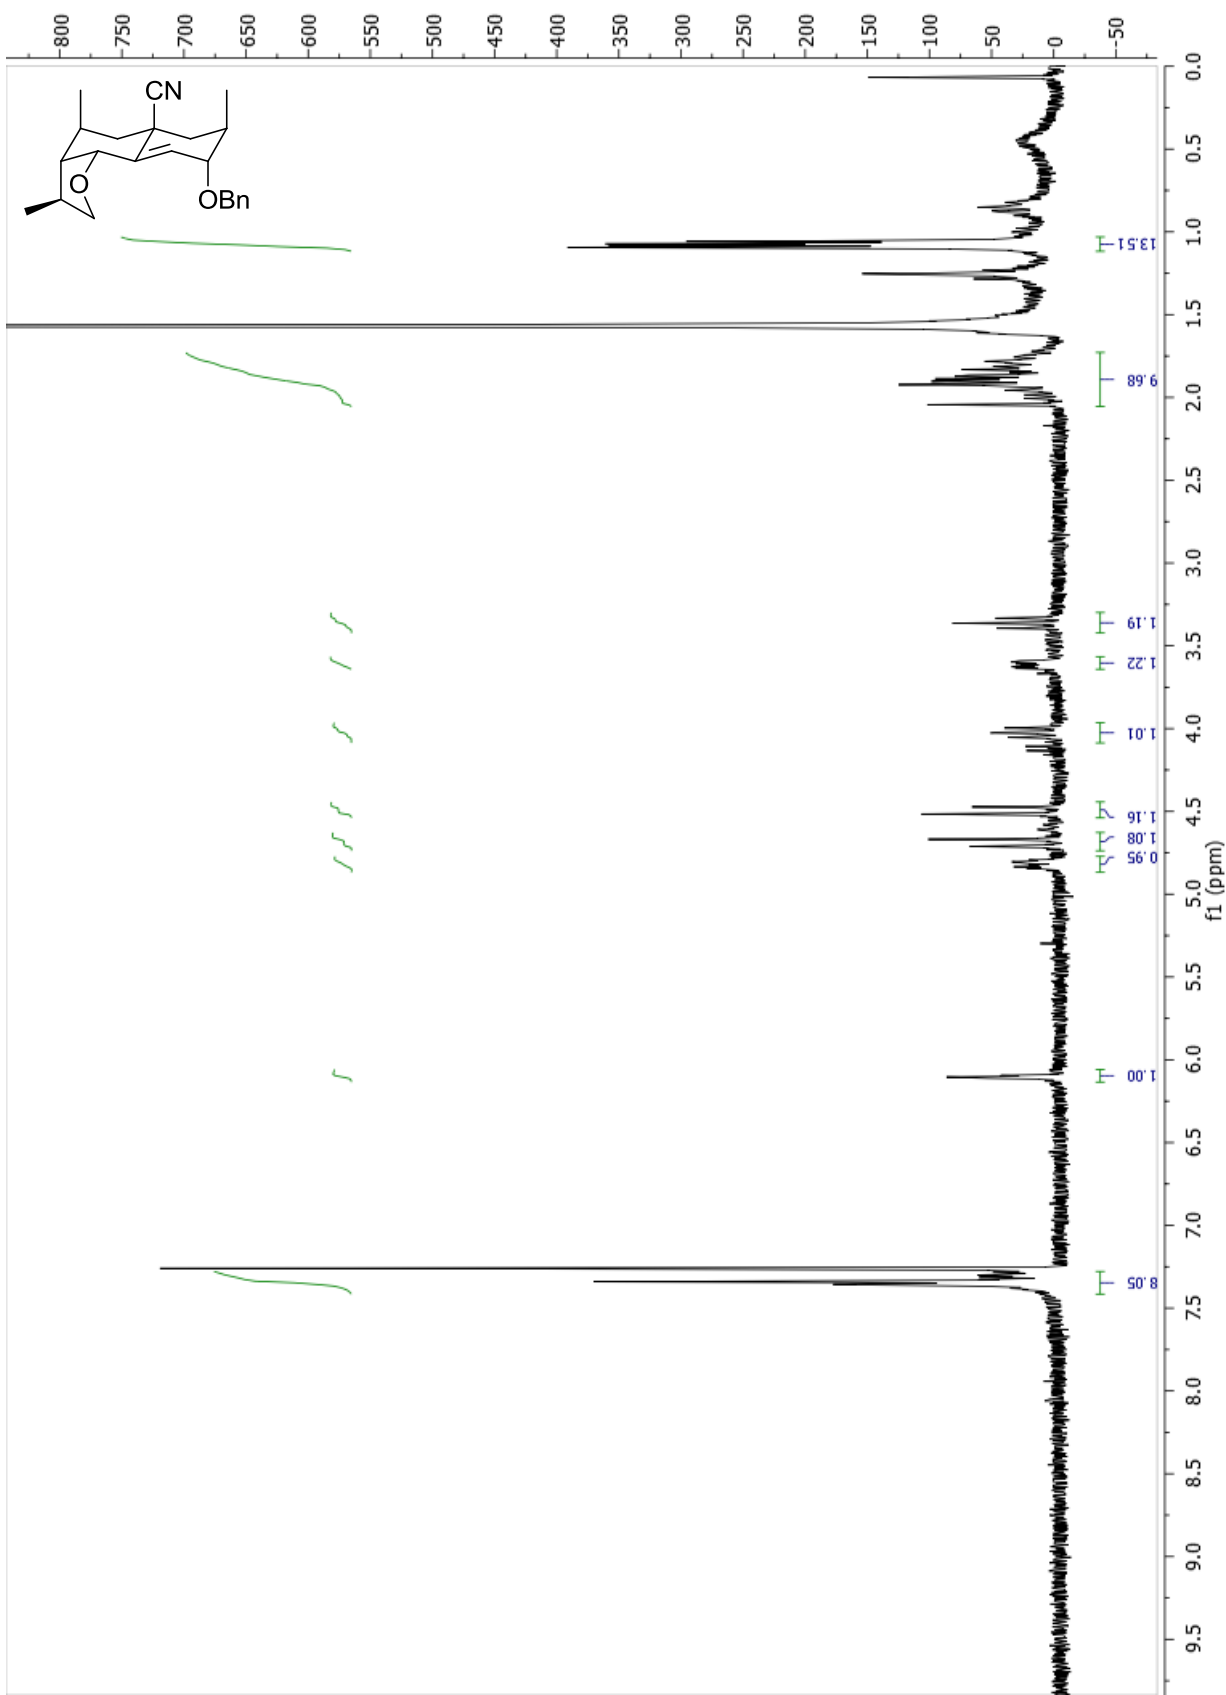

Tetrahydrofuran benzyl ether 20b – <sup>13</sup>C NMR (125 MHz)

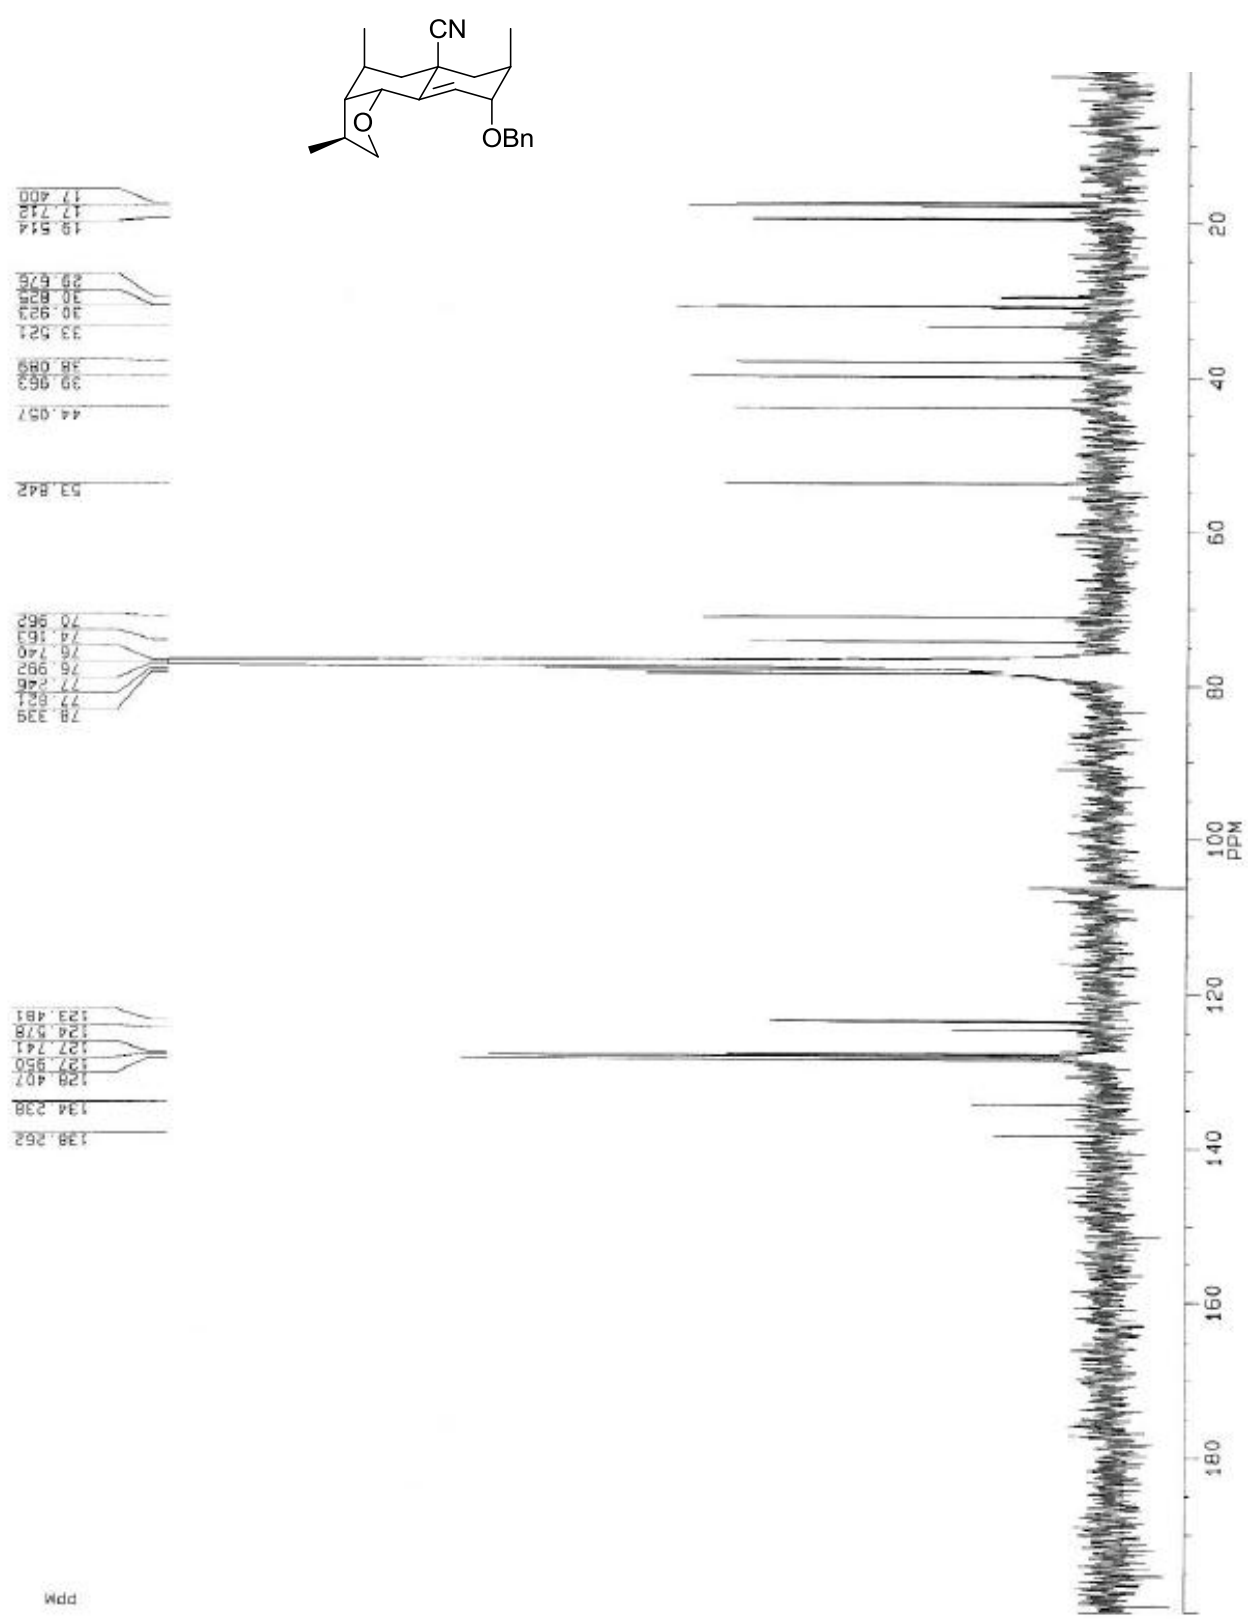

Diene diol 21 – <sup>1</sup>H NMR (270 MHz)

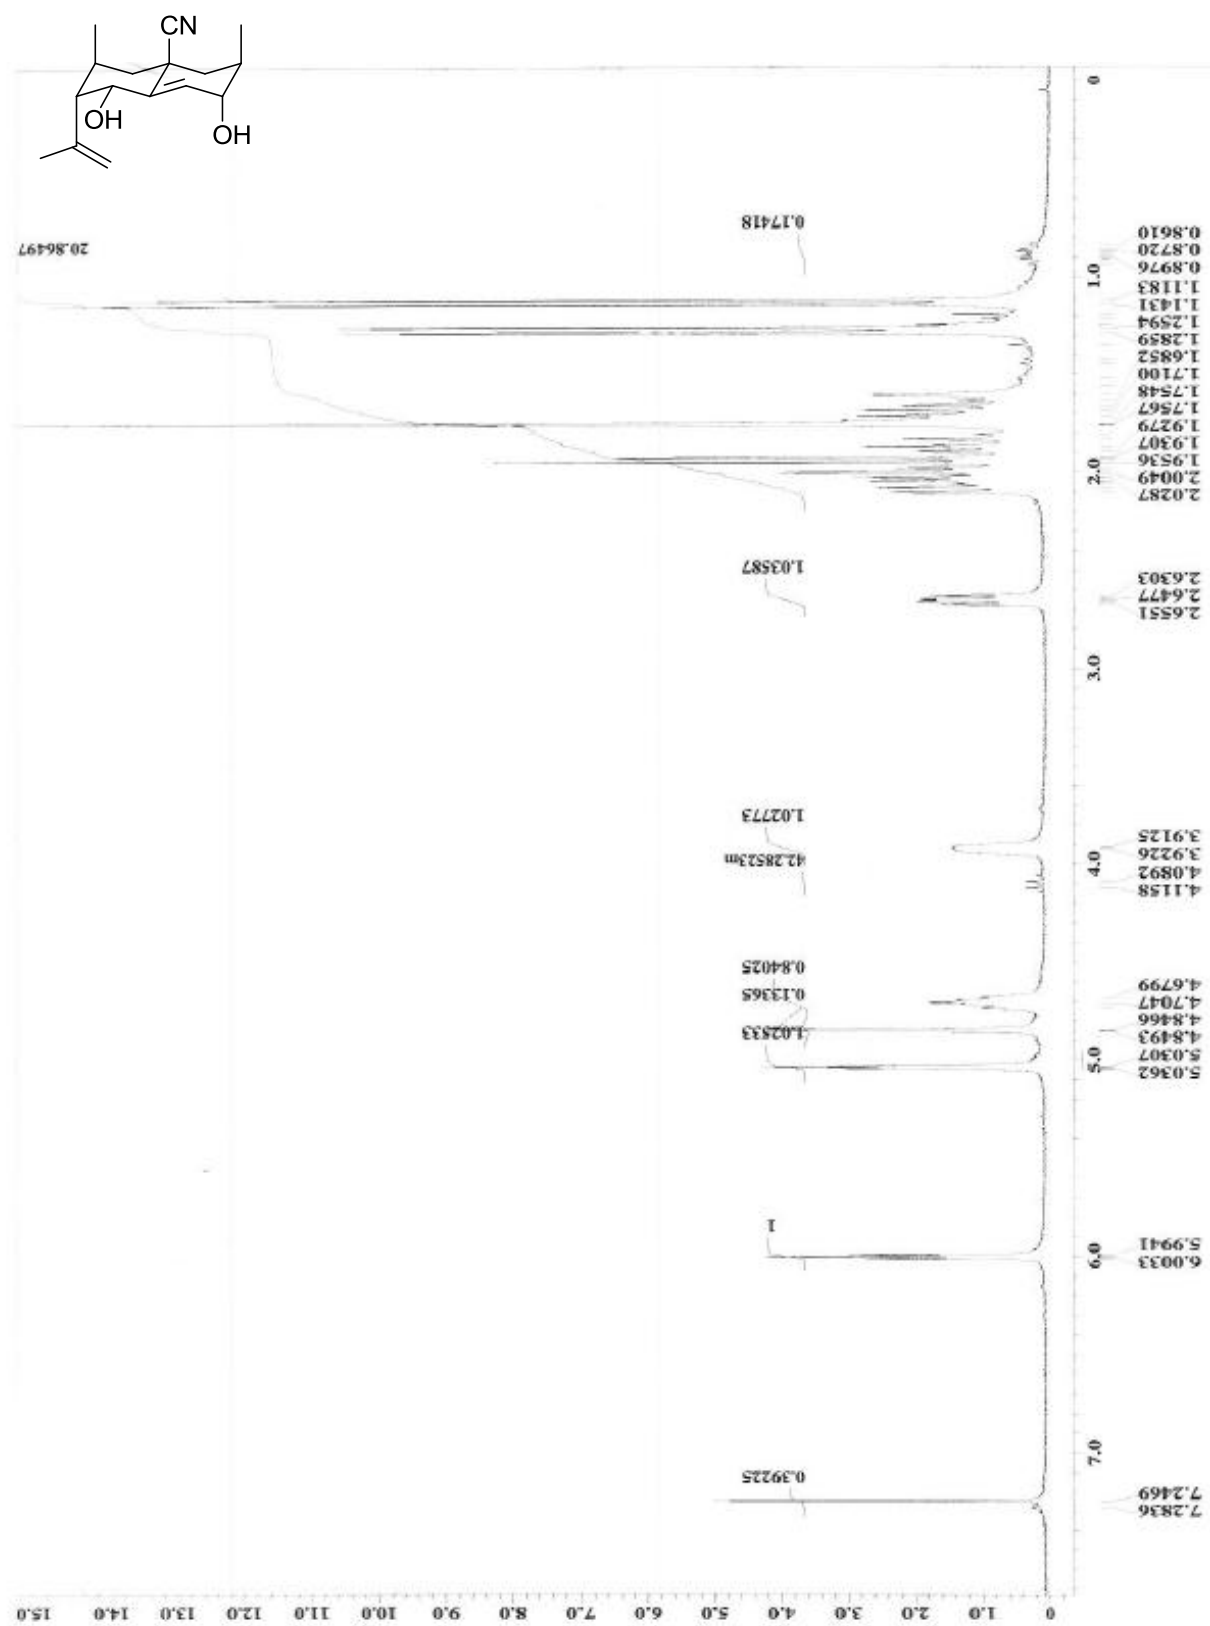

Diene diol 21 – <sup>13</sup>C APT NMR (125 MHz)

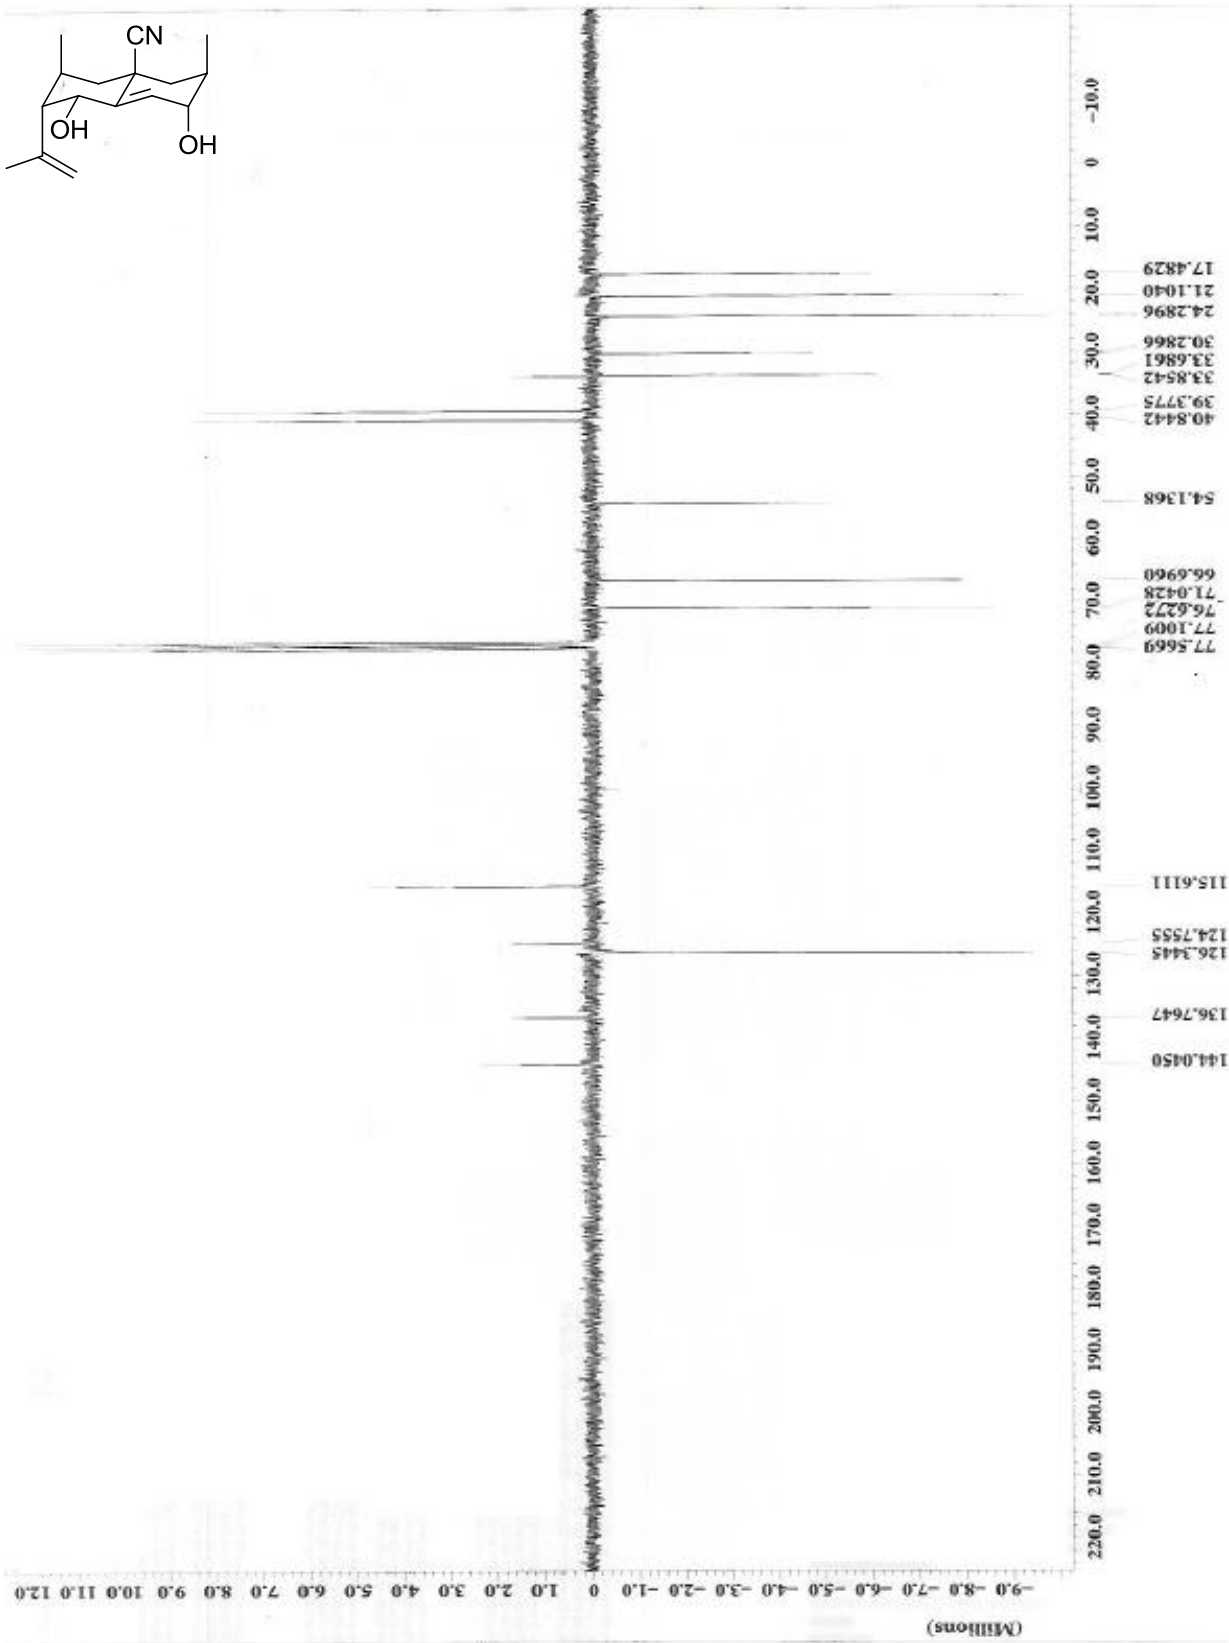

Diene dimethyl ether 21a – <sup>1</sup>H NMR (270 MHz)

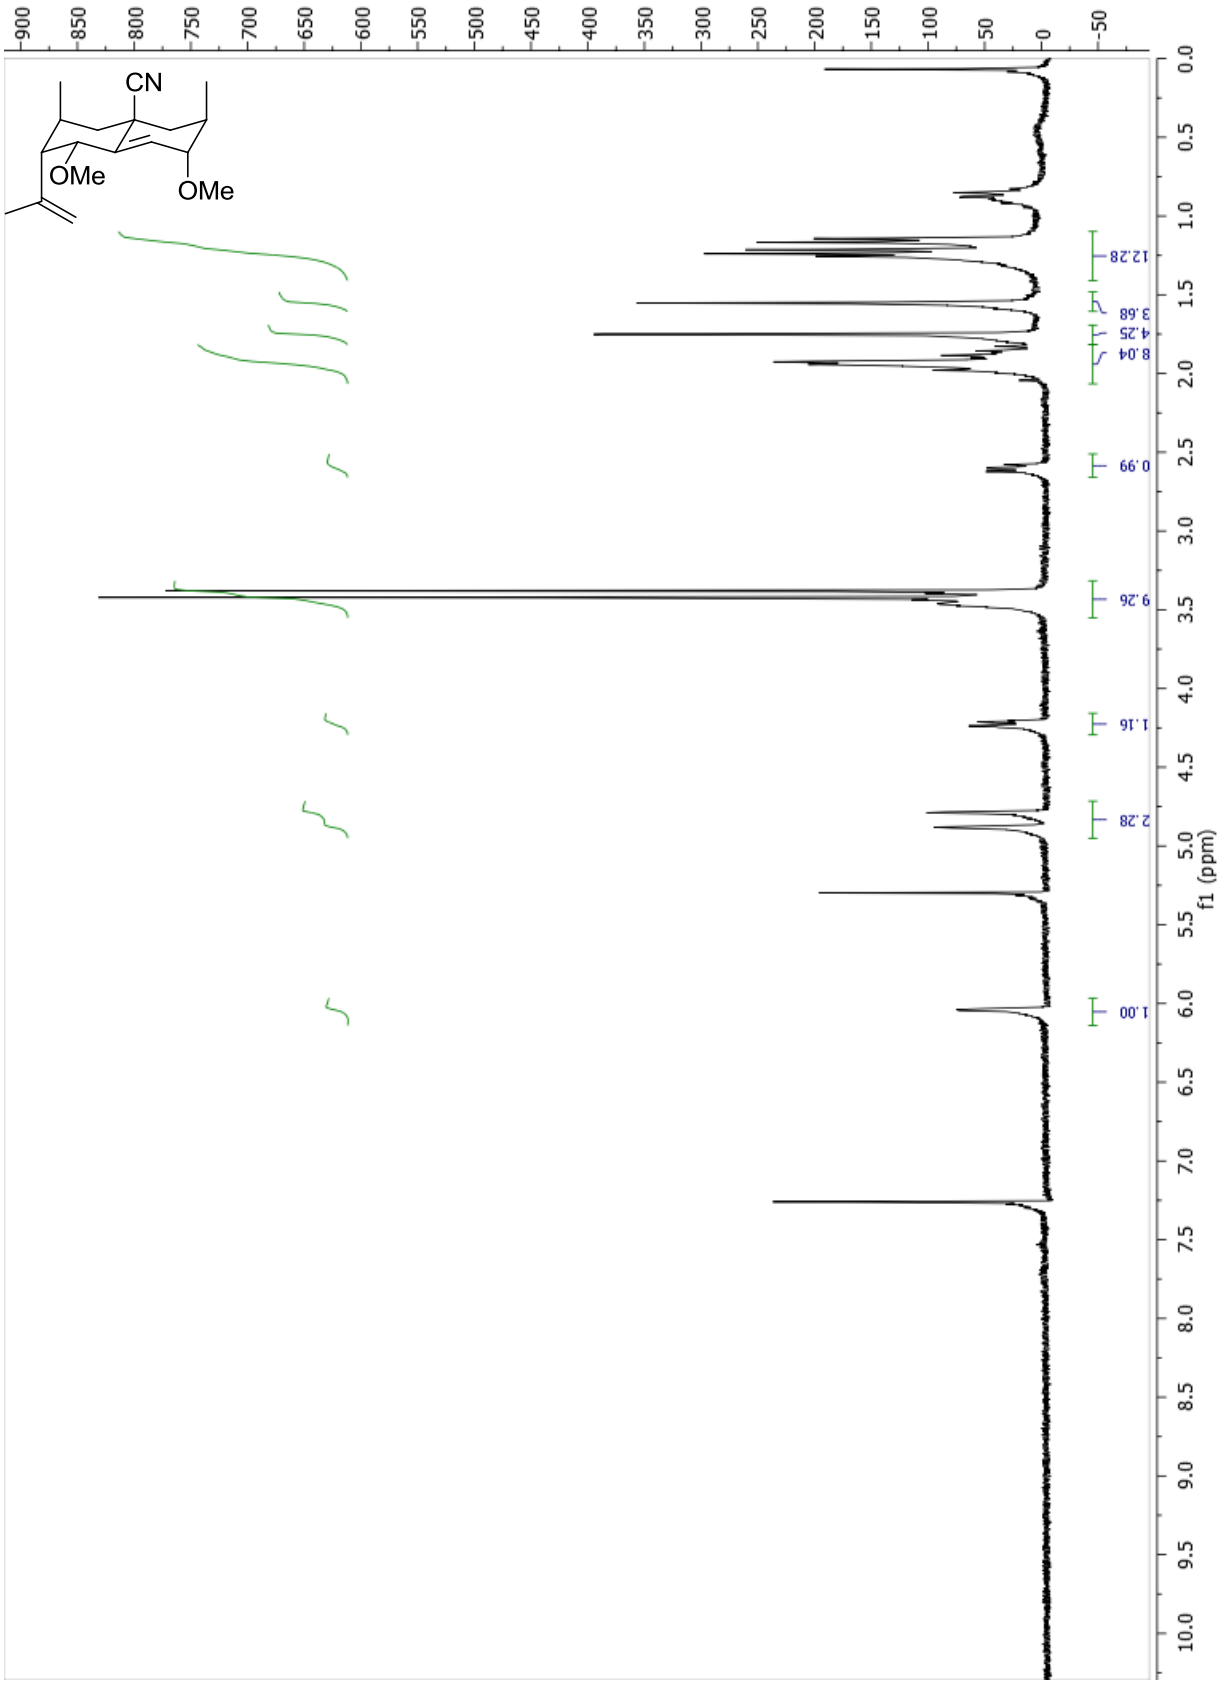

Diene dimethyl ether 21a – <sup>13</sup>C NMR (125 MHz)

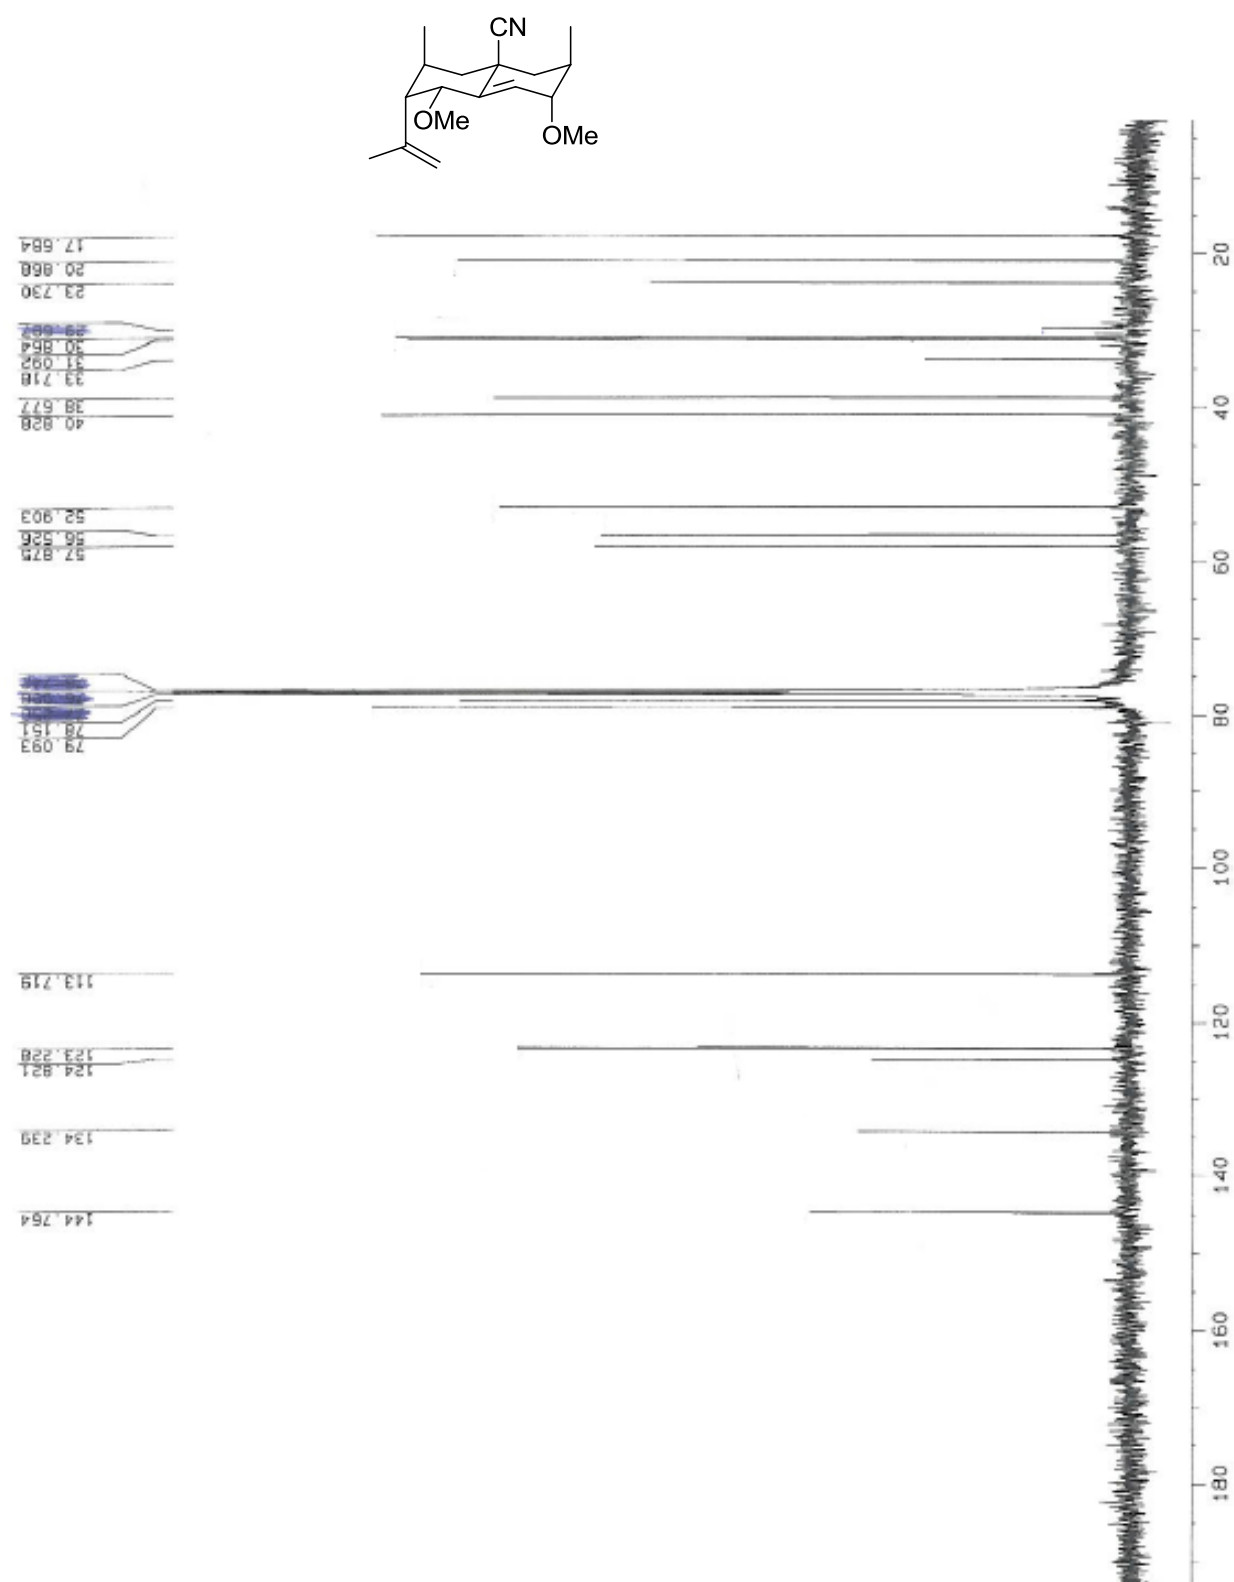



Diene dibenzyl ether 21b – <sup>1</sup>H NMR (270 MHz)

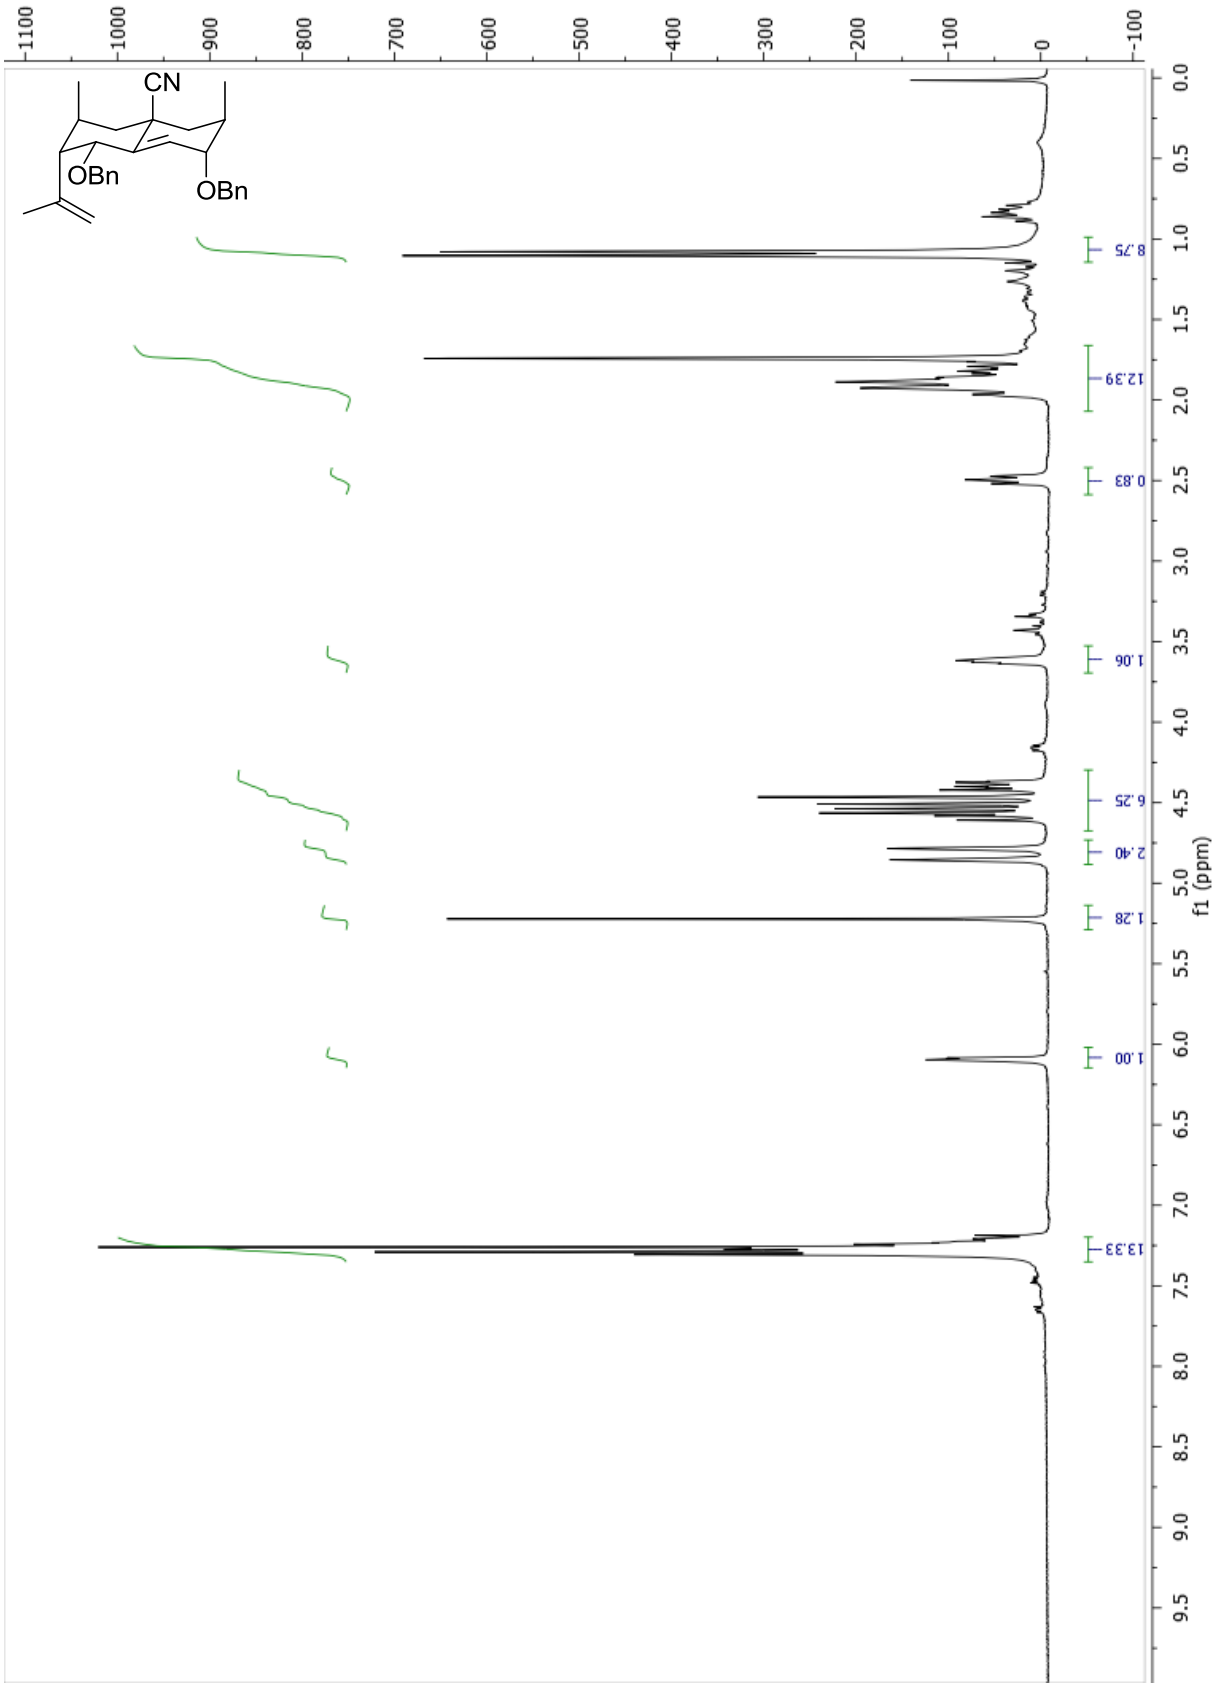

Diene dibenzyl ether 21b – <sup>13</sup>C APT NMR (100 MHz)

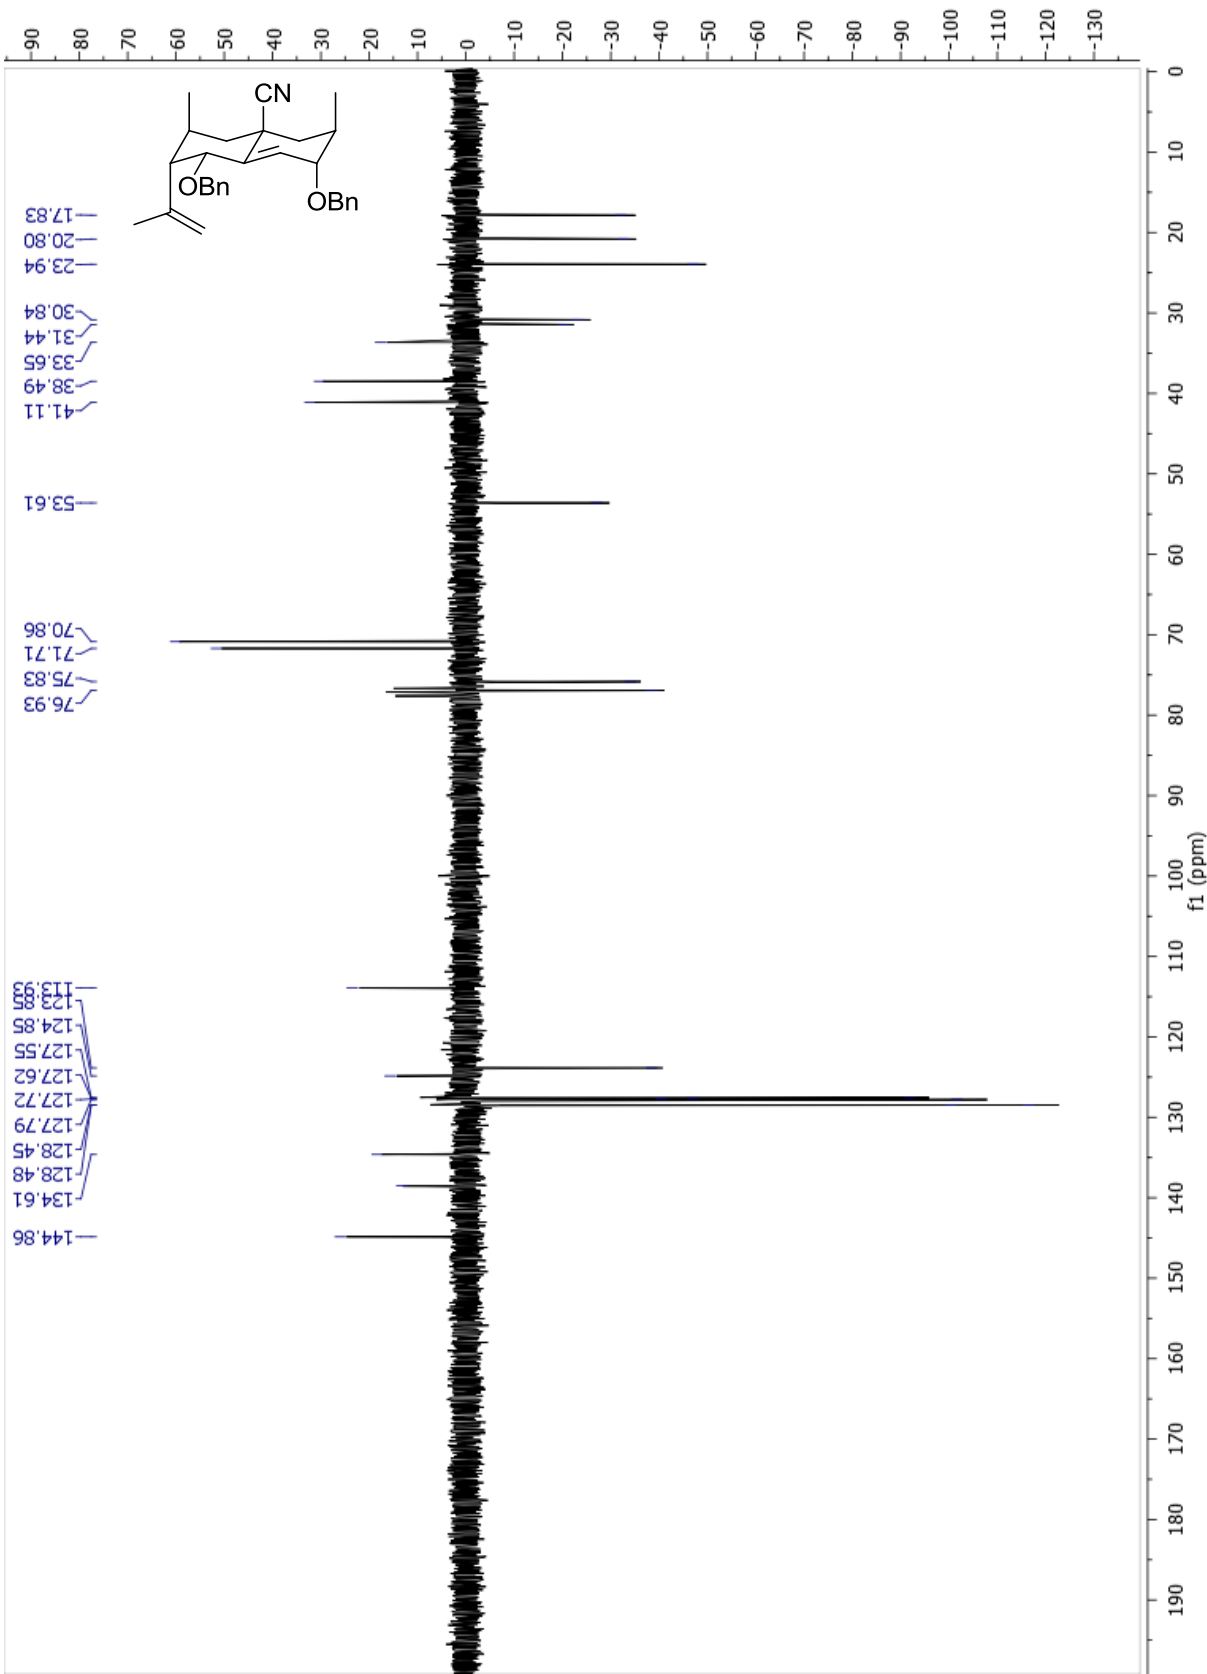

Diene di-PMB ether 21c – <sup>1</sup>H NMR (270 MHz)

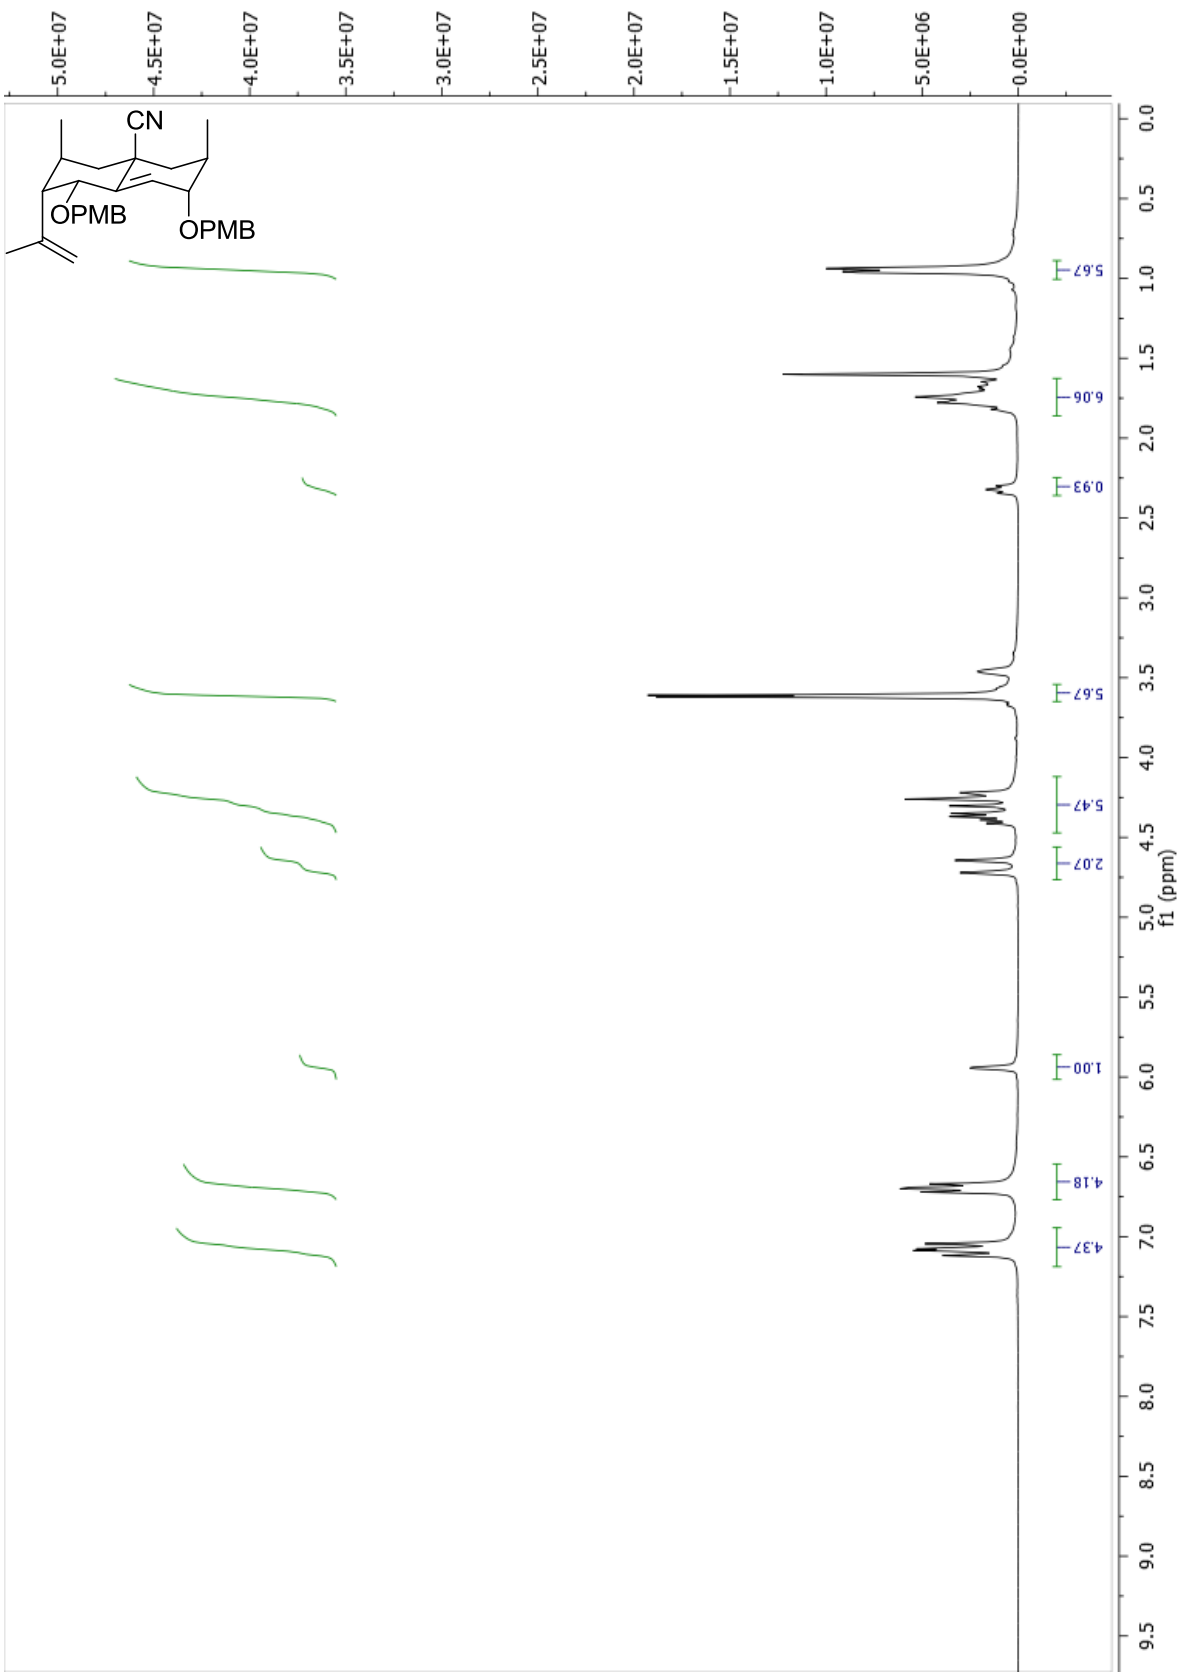

Diene di-PMB ether 21c – <sup>13</sup>C APT NMR (68 MHz)

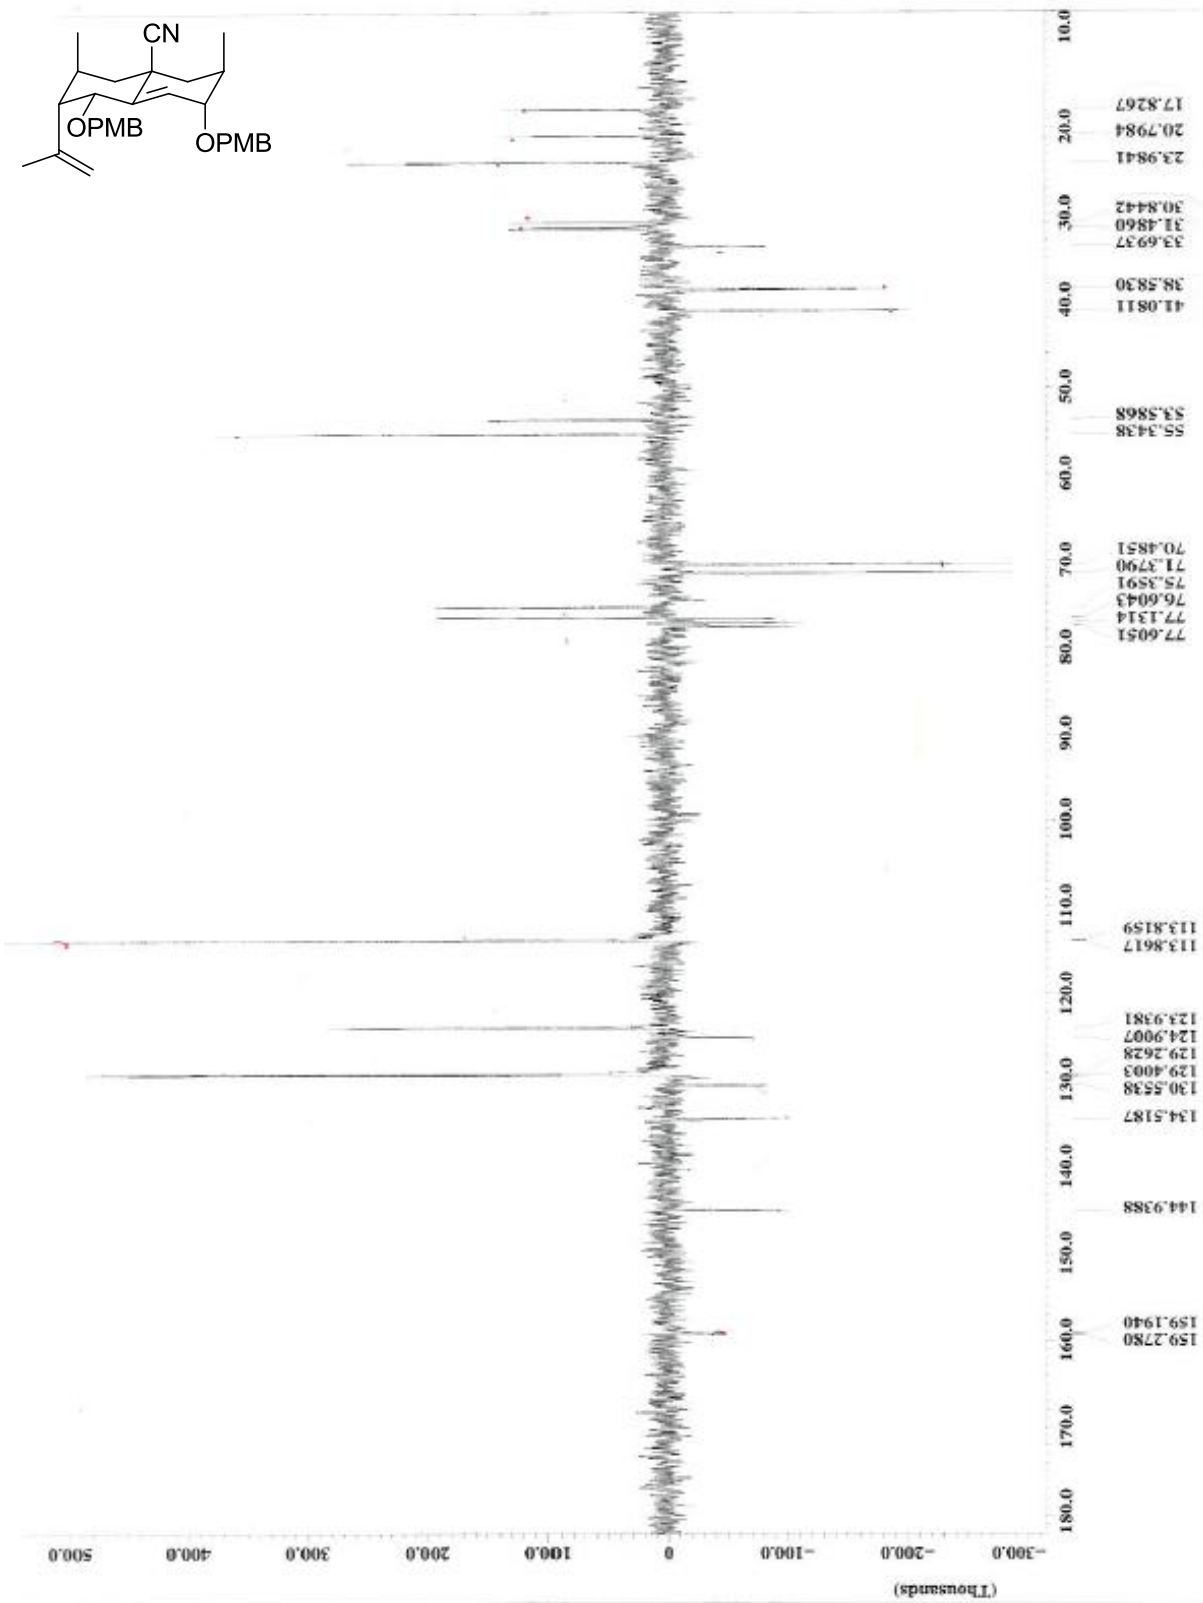

Diene momobenzyl ether 21d – <sup>1</sup>H NMR (270 MHz)

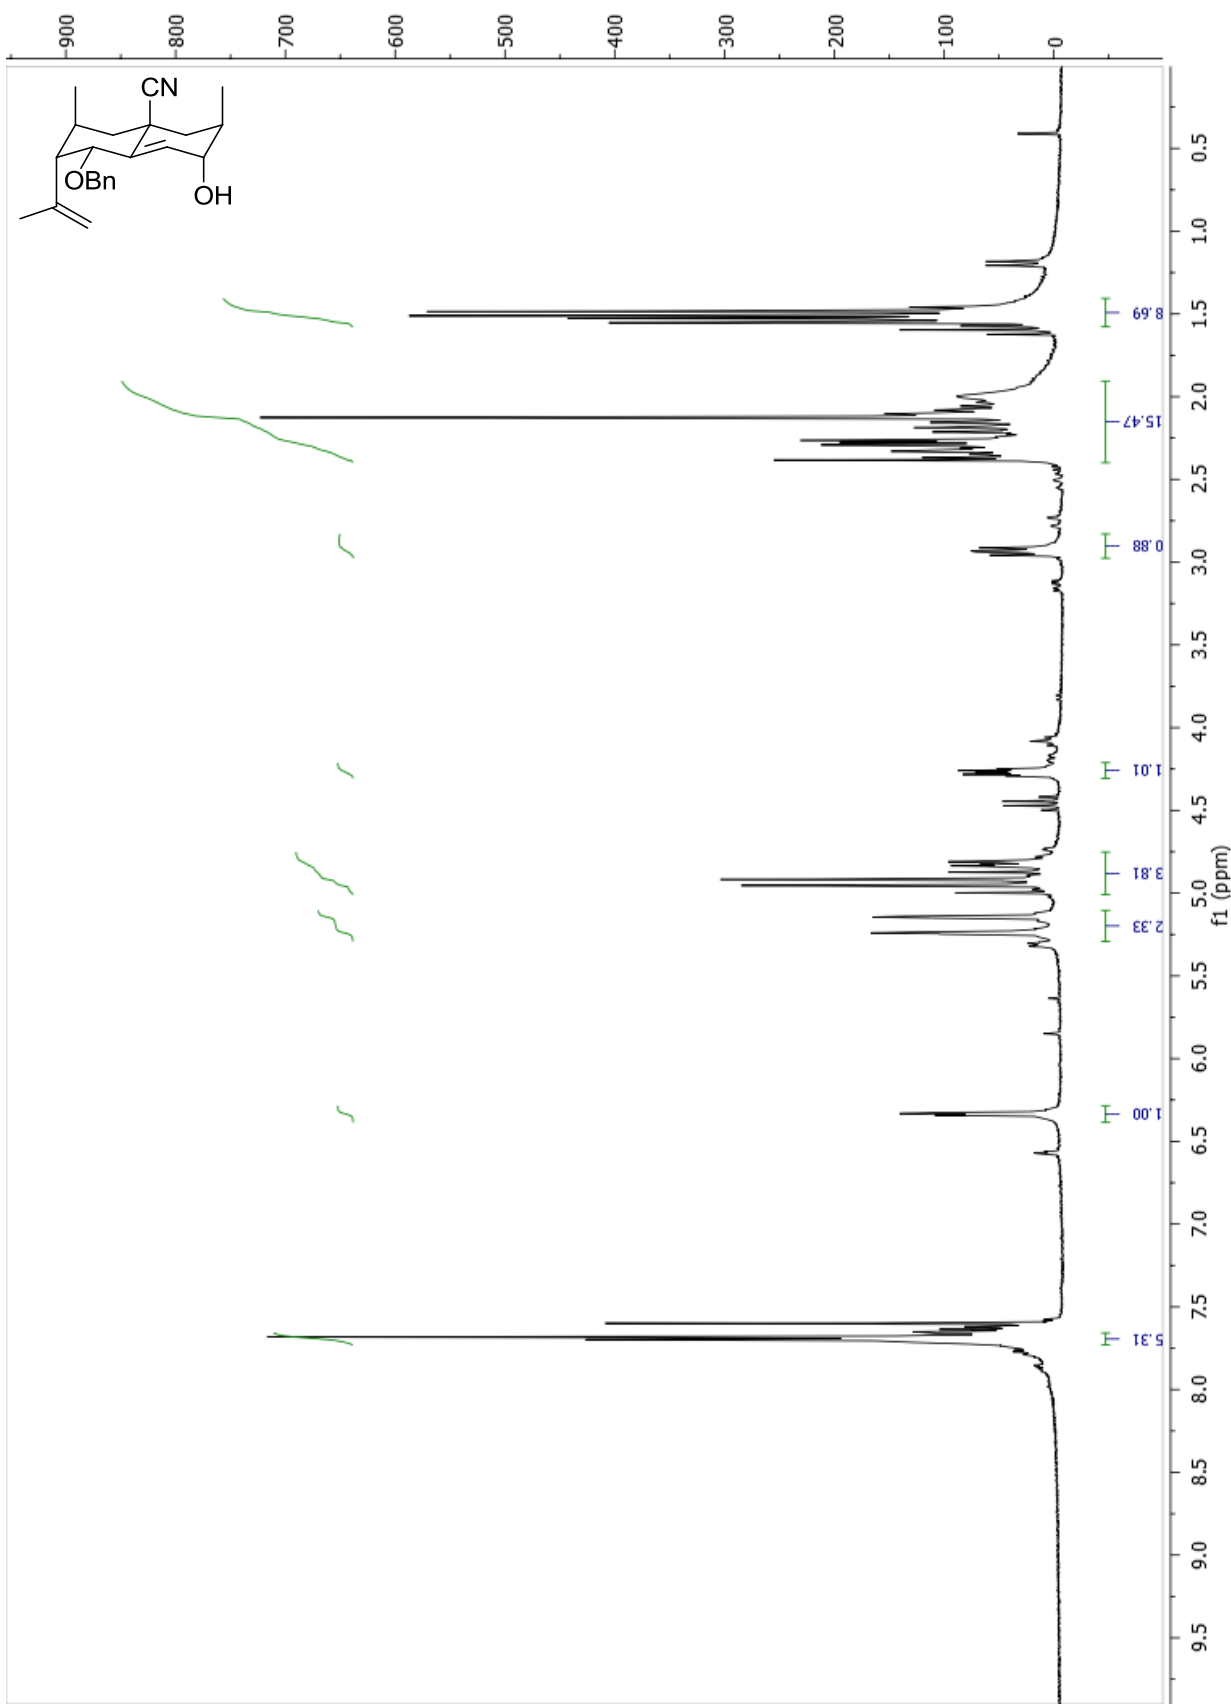

Diene momobenzyl ether 21d – <sup>13</sup>C APT NMR (68 MHz)

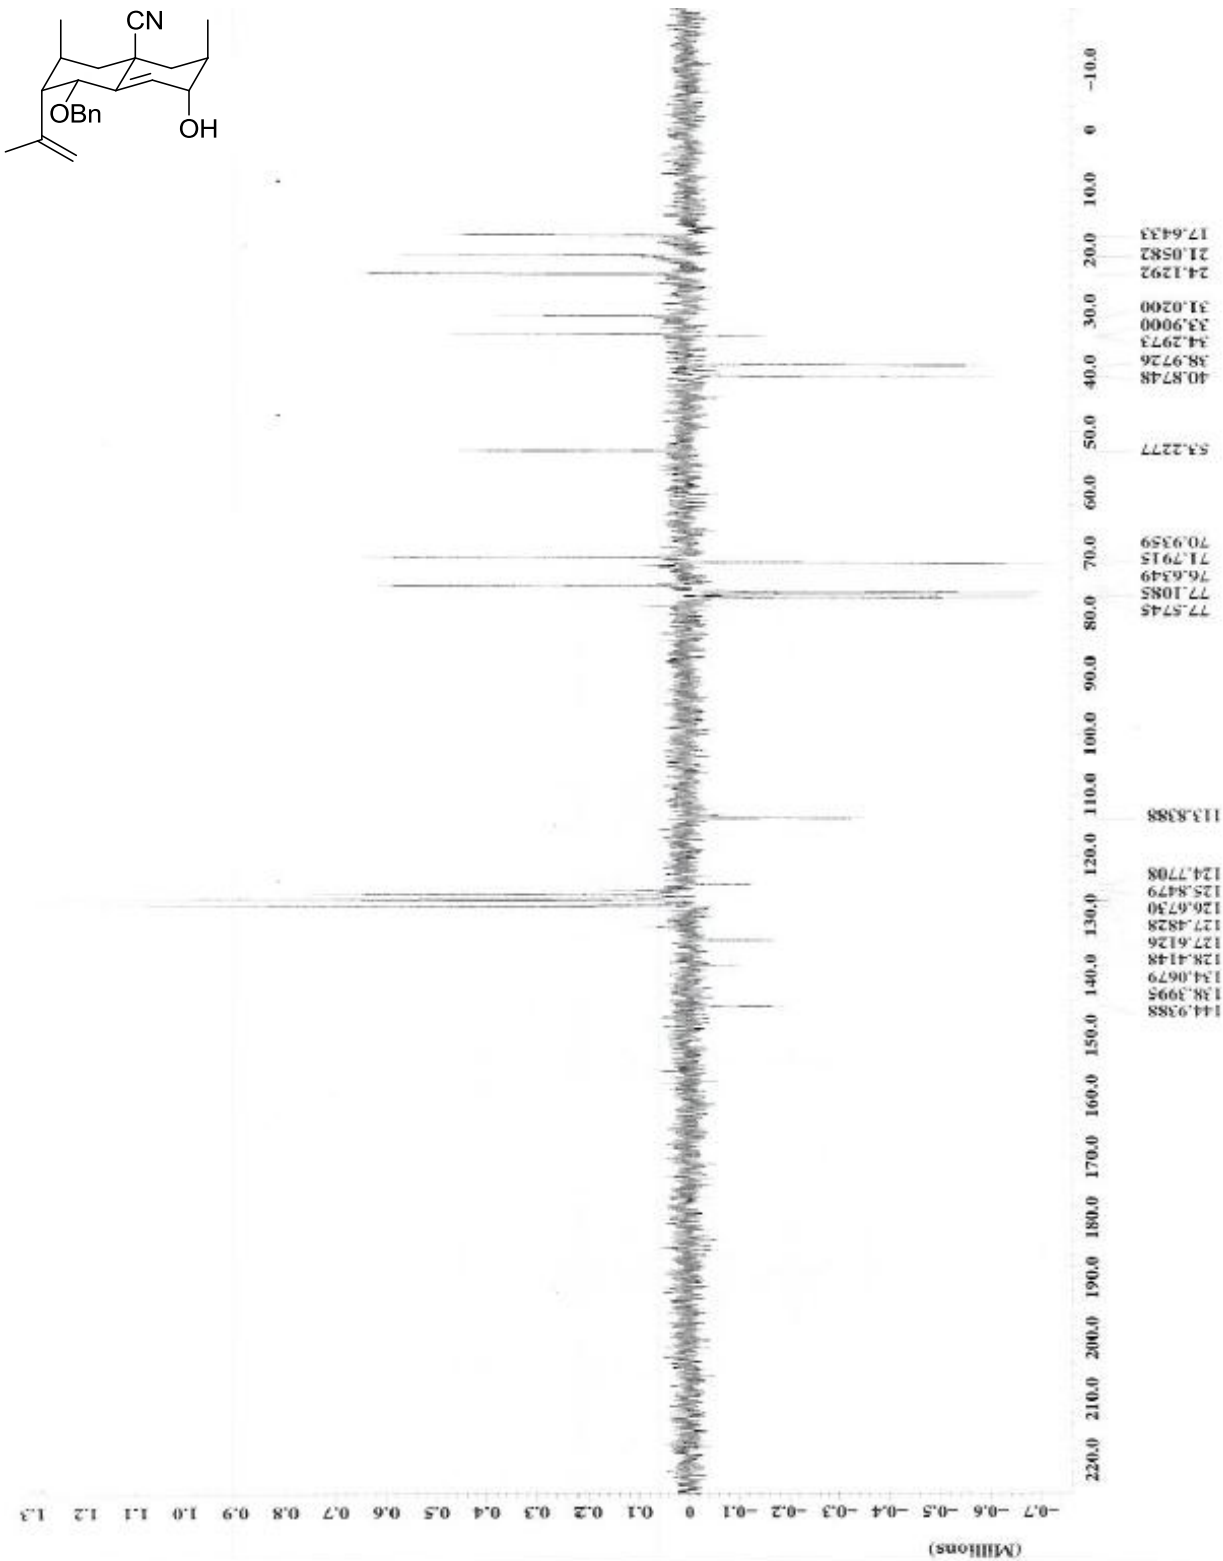

Diol 22 – <sup>1</sup>H NMR (270 MHz)

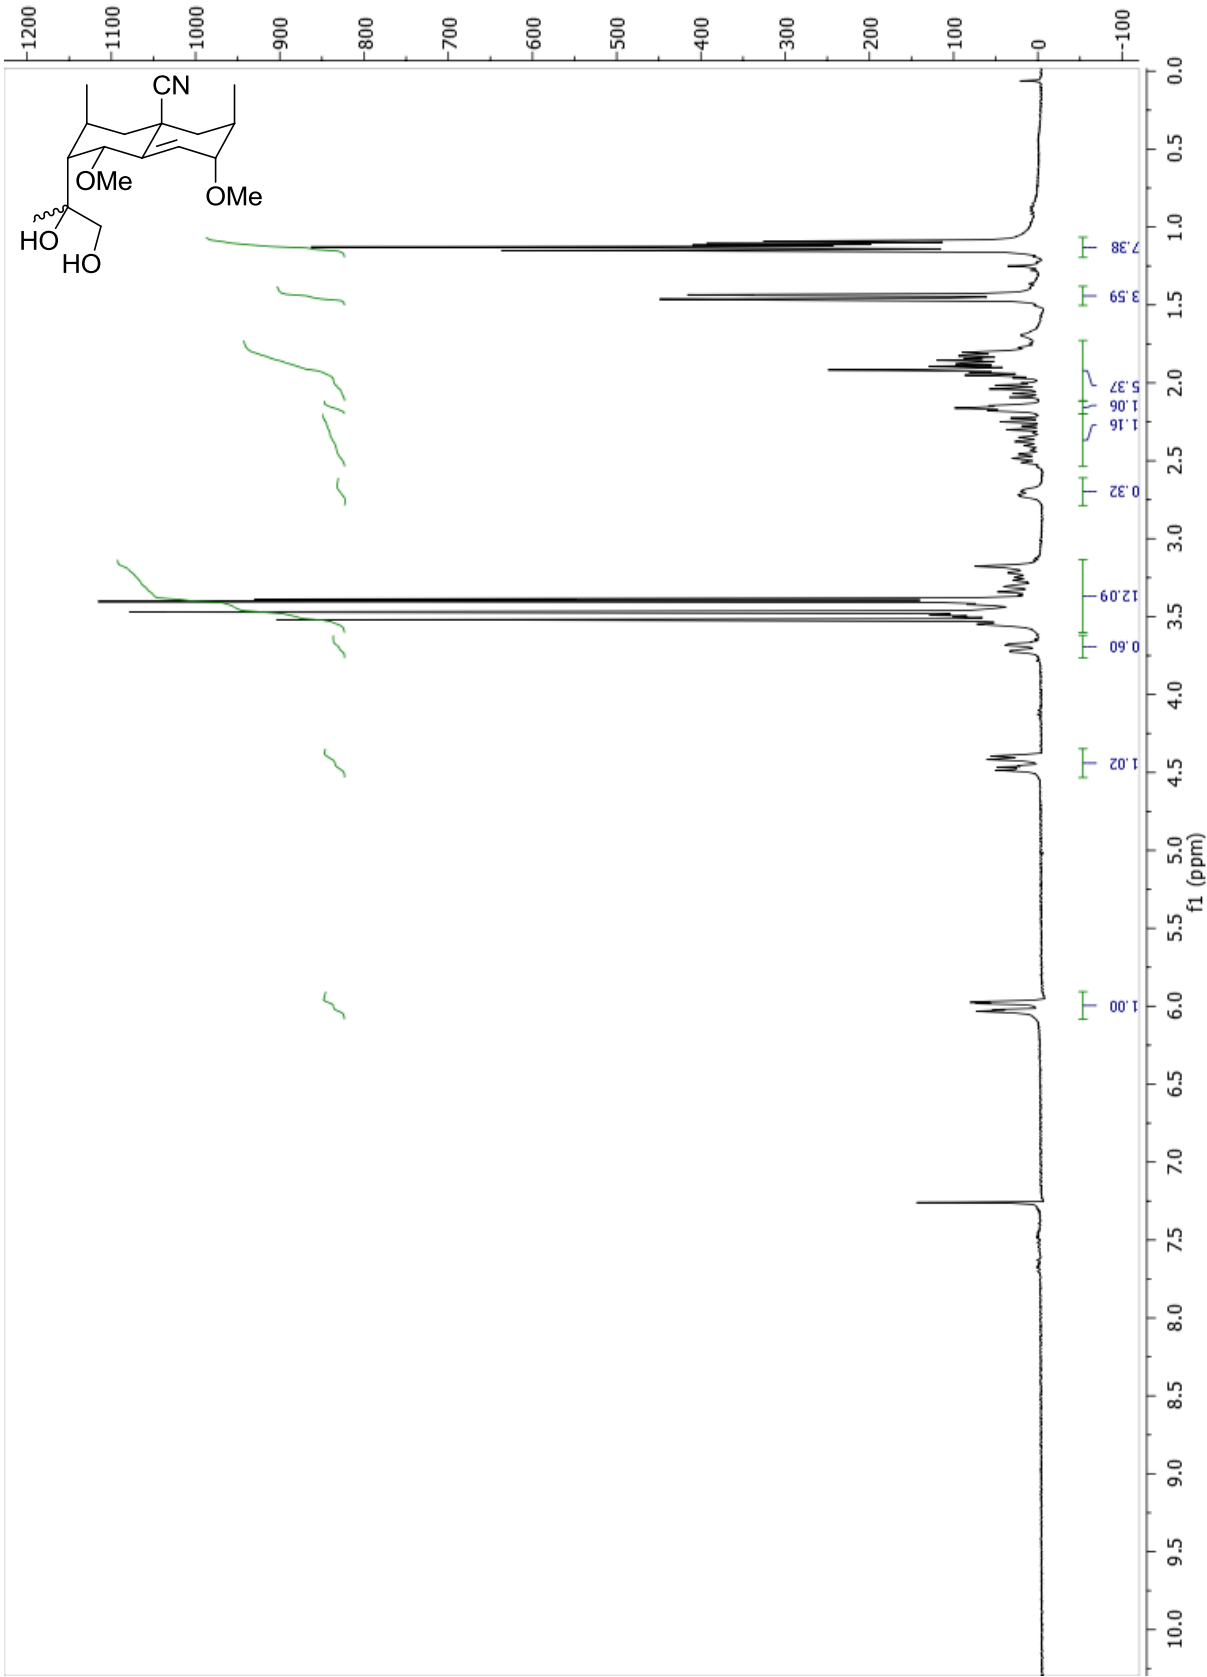

Diol 22 – <sup>13</sup>C NMR (100 MHz)

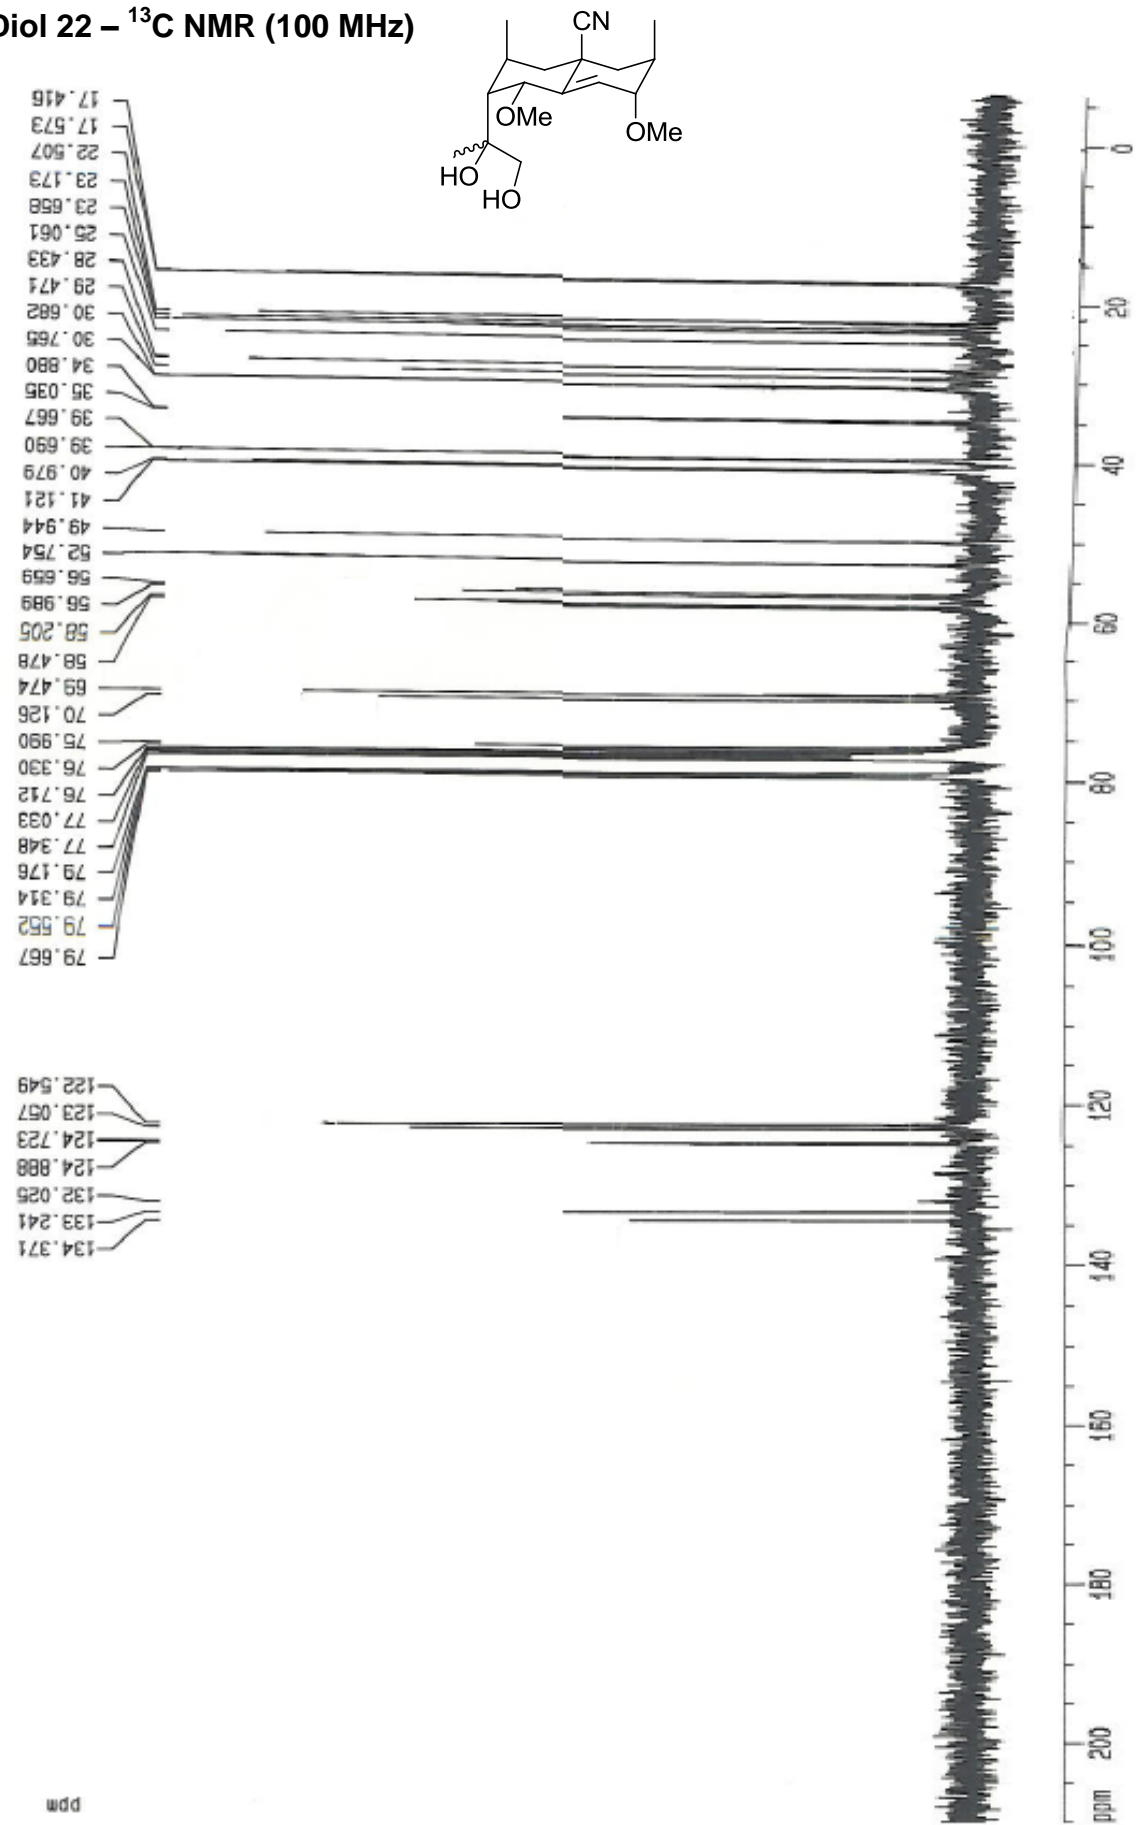



**$\beta$ -Dihydroagarofuran 23 –  $^1\text{H}$  NMR (400 MHz)**

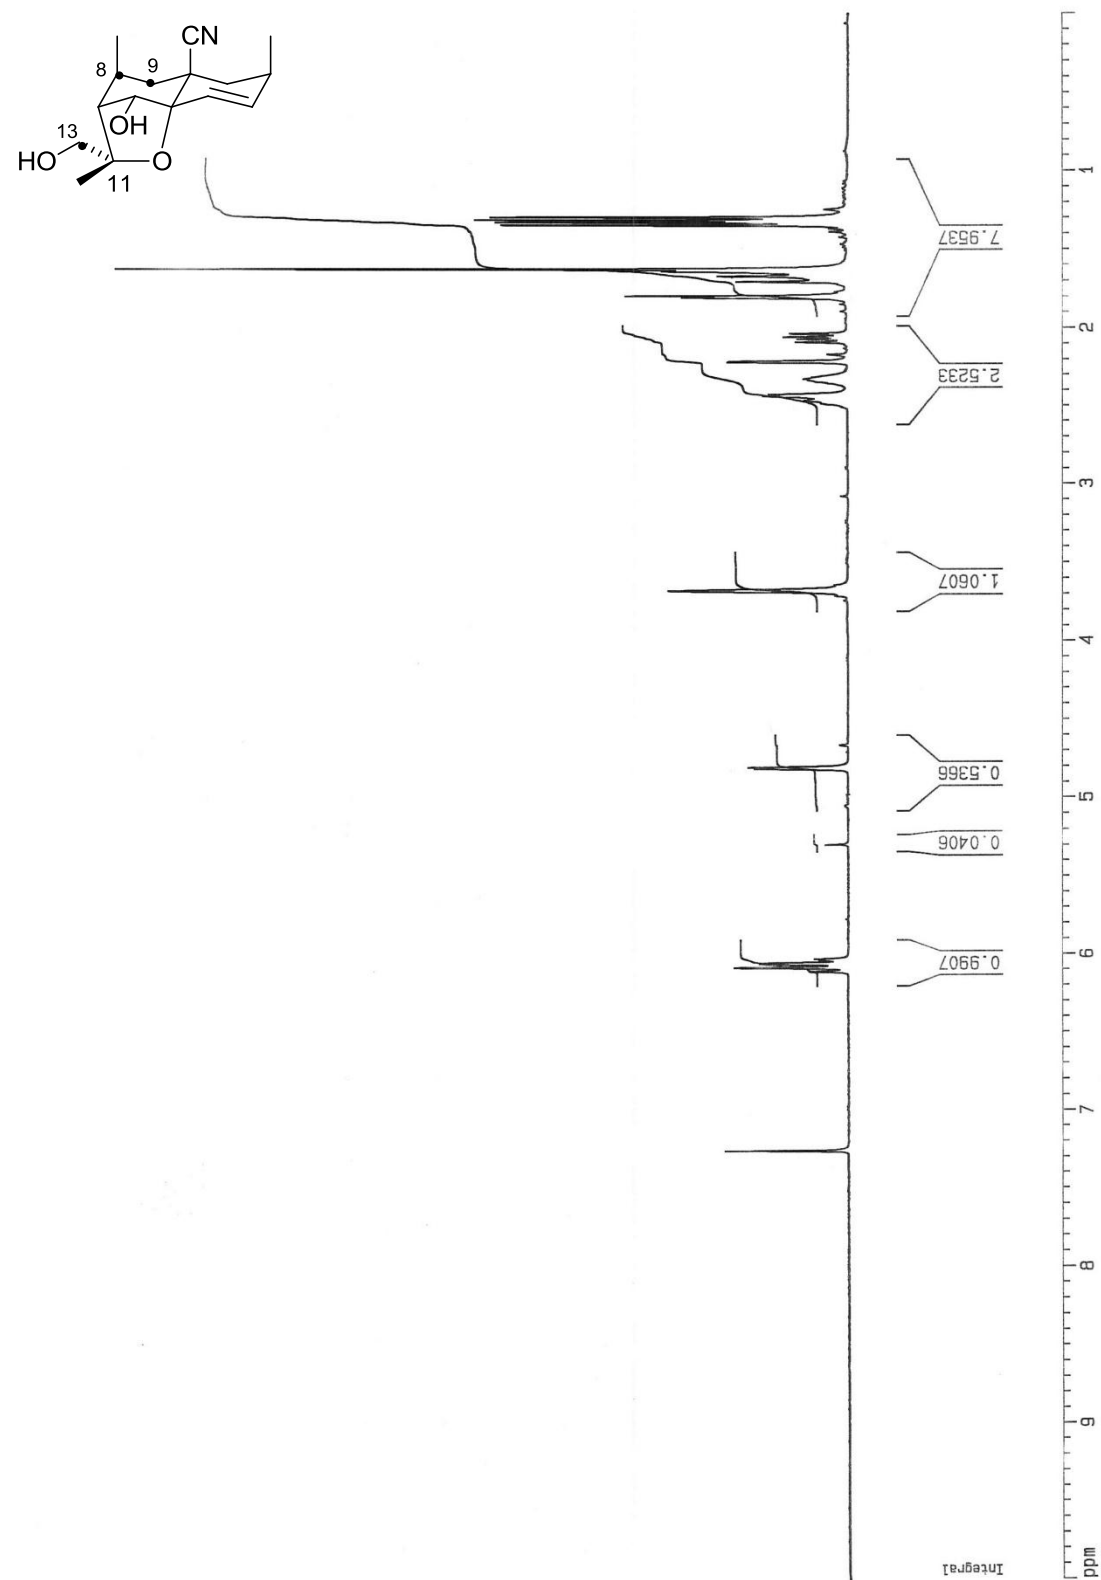

**$\beta$ -Dihydroagarofuran 23 –  $^{13}\text{C}$  NMR (100 MHz)**

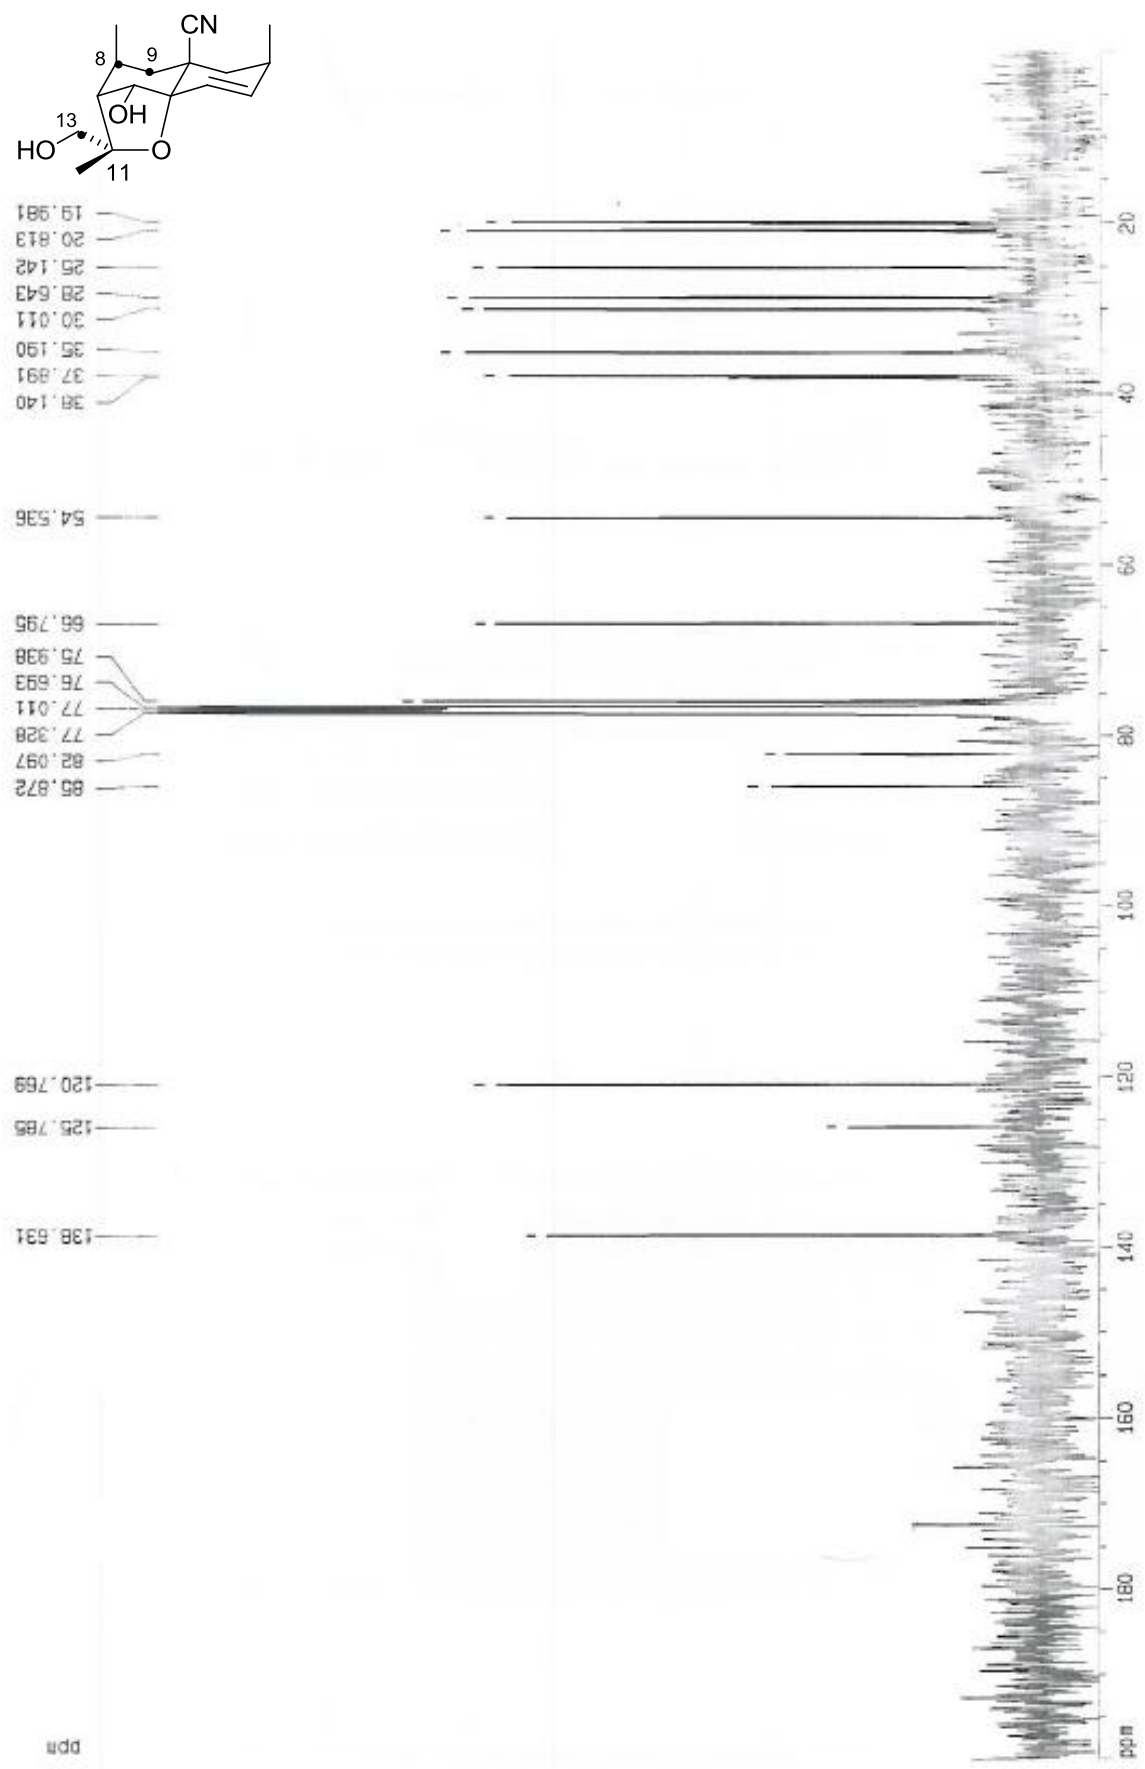

# $\beta$ -Dihydroagarofuran 23 – NOESY (400 MHz)

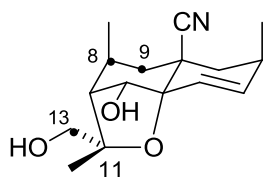

| NOESY | 13                         | 8 | 9 |
|-------|----------------------------|---|---|
| 13    | -                          | < | < |
| 8     | < <input type="checkbox"/> | - | < |
| 9     | <                          | < | - |

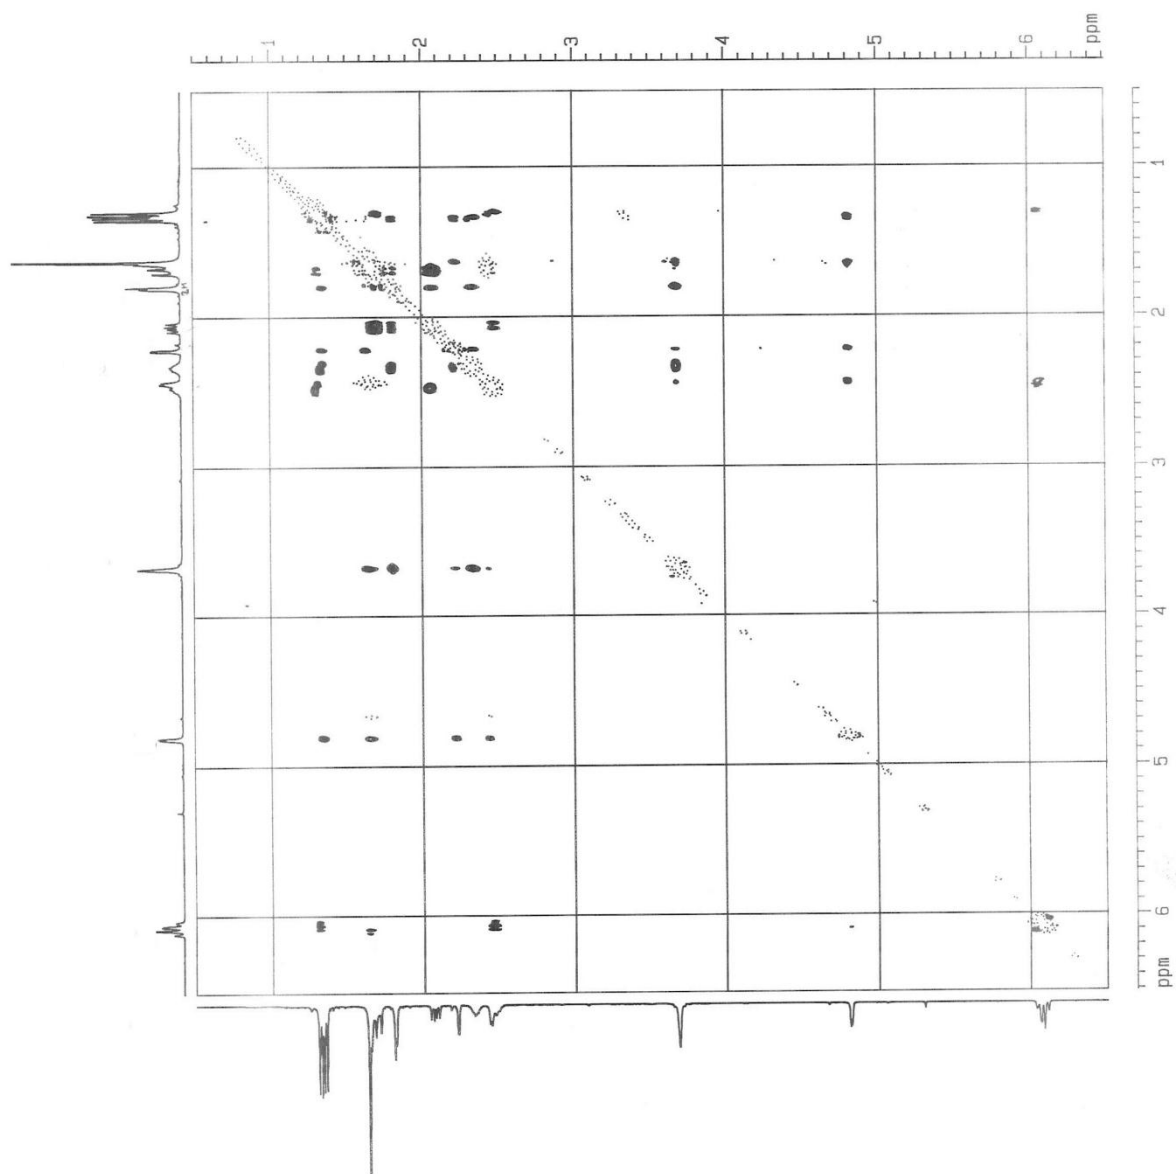

**β-Dihydroagarofuran 23 – COSY (400 MHz)**

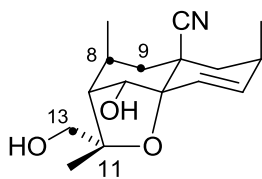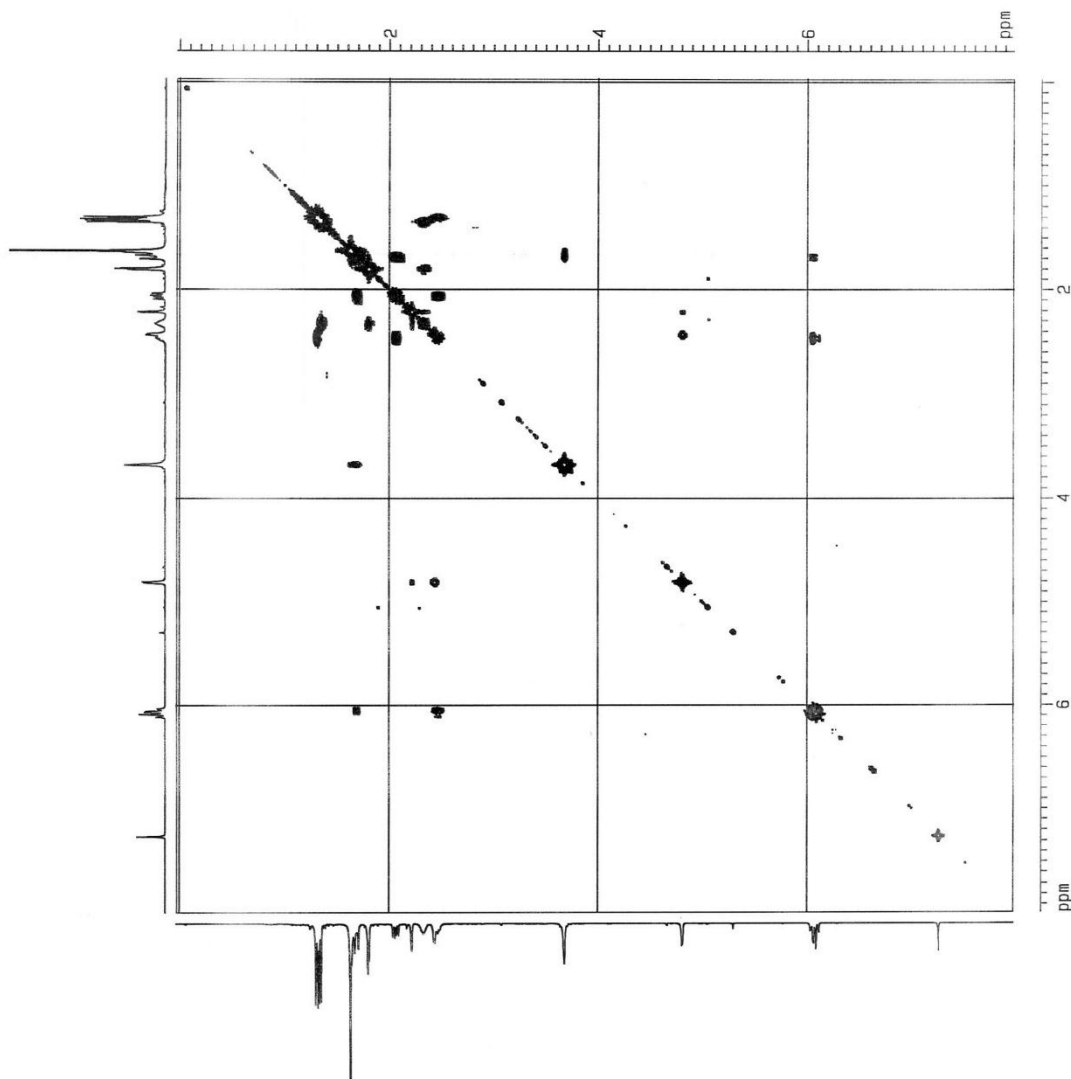

**β-Dihydroagarofuran 23 – HMQC (400 MHz)**

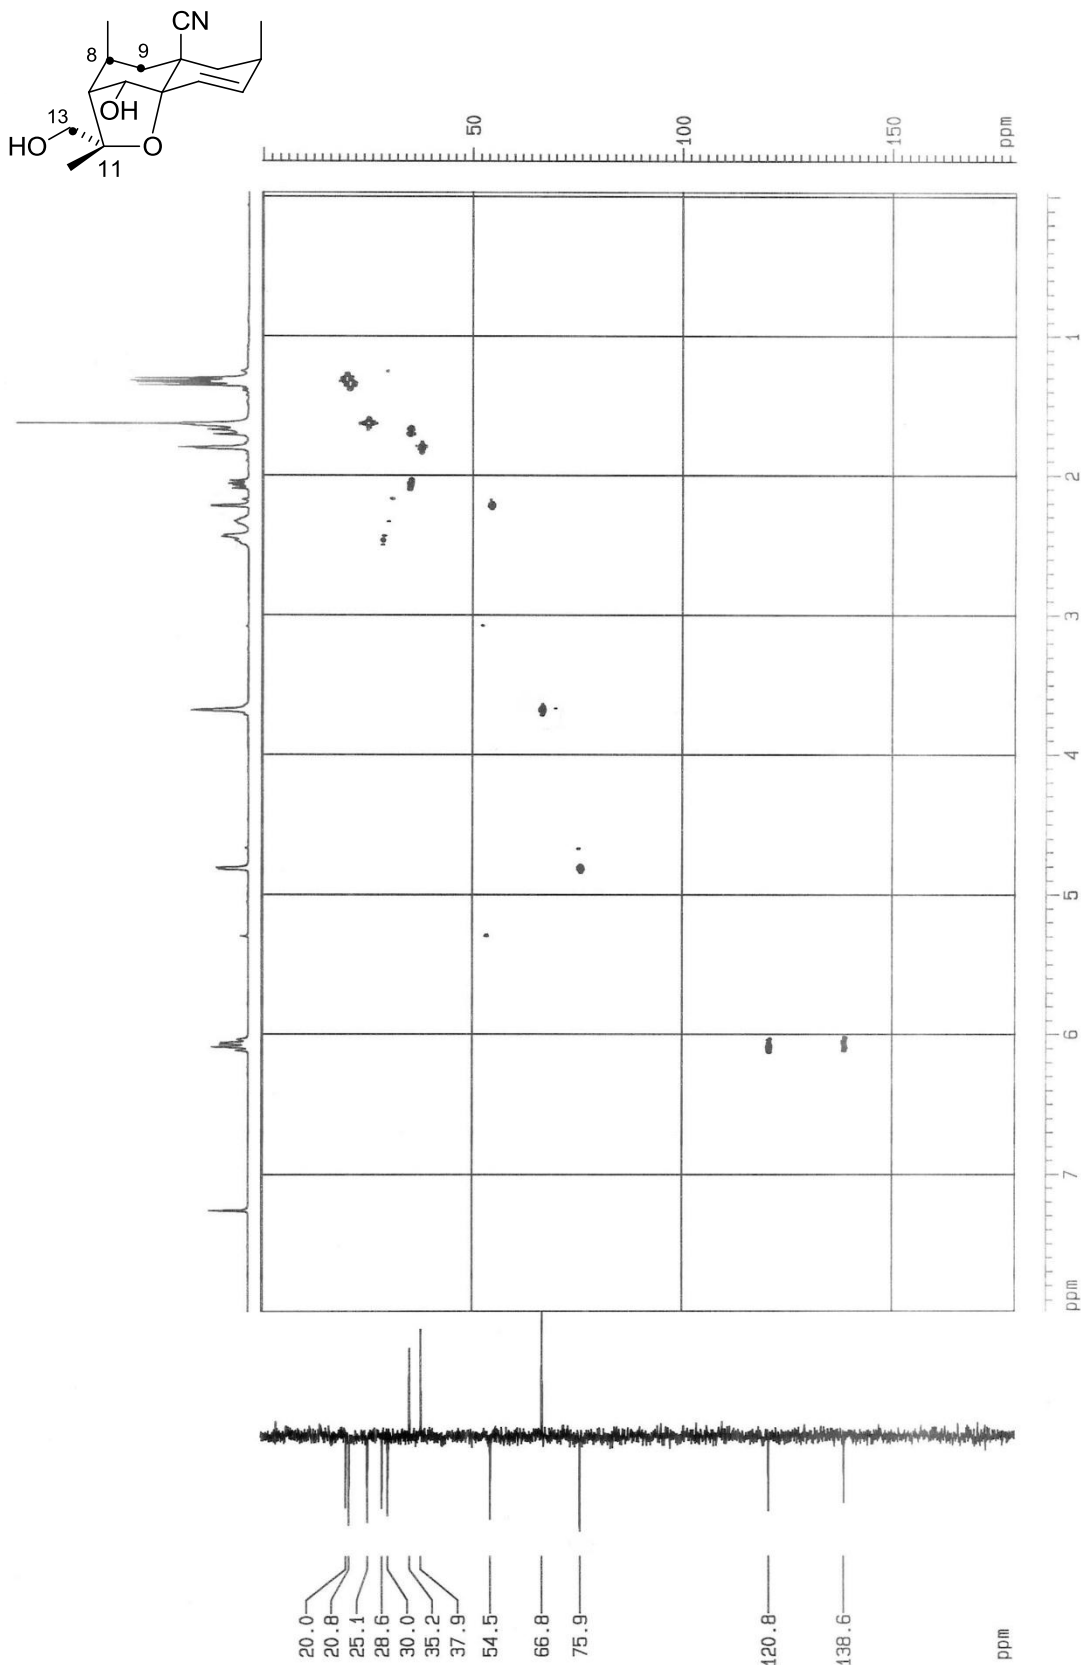

**$\beta$ -Dihydroagarofurans 24a/24b –  $^1\text{H}$  NMR (270 MHz)**

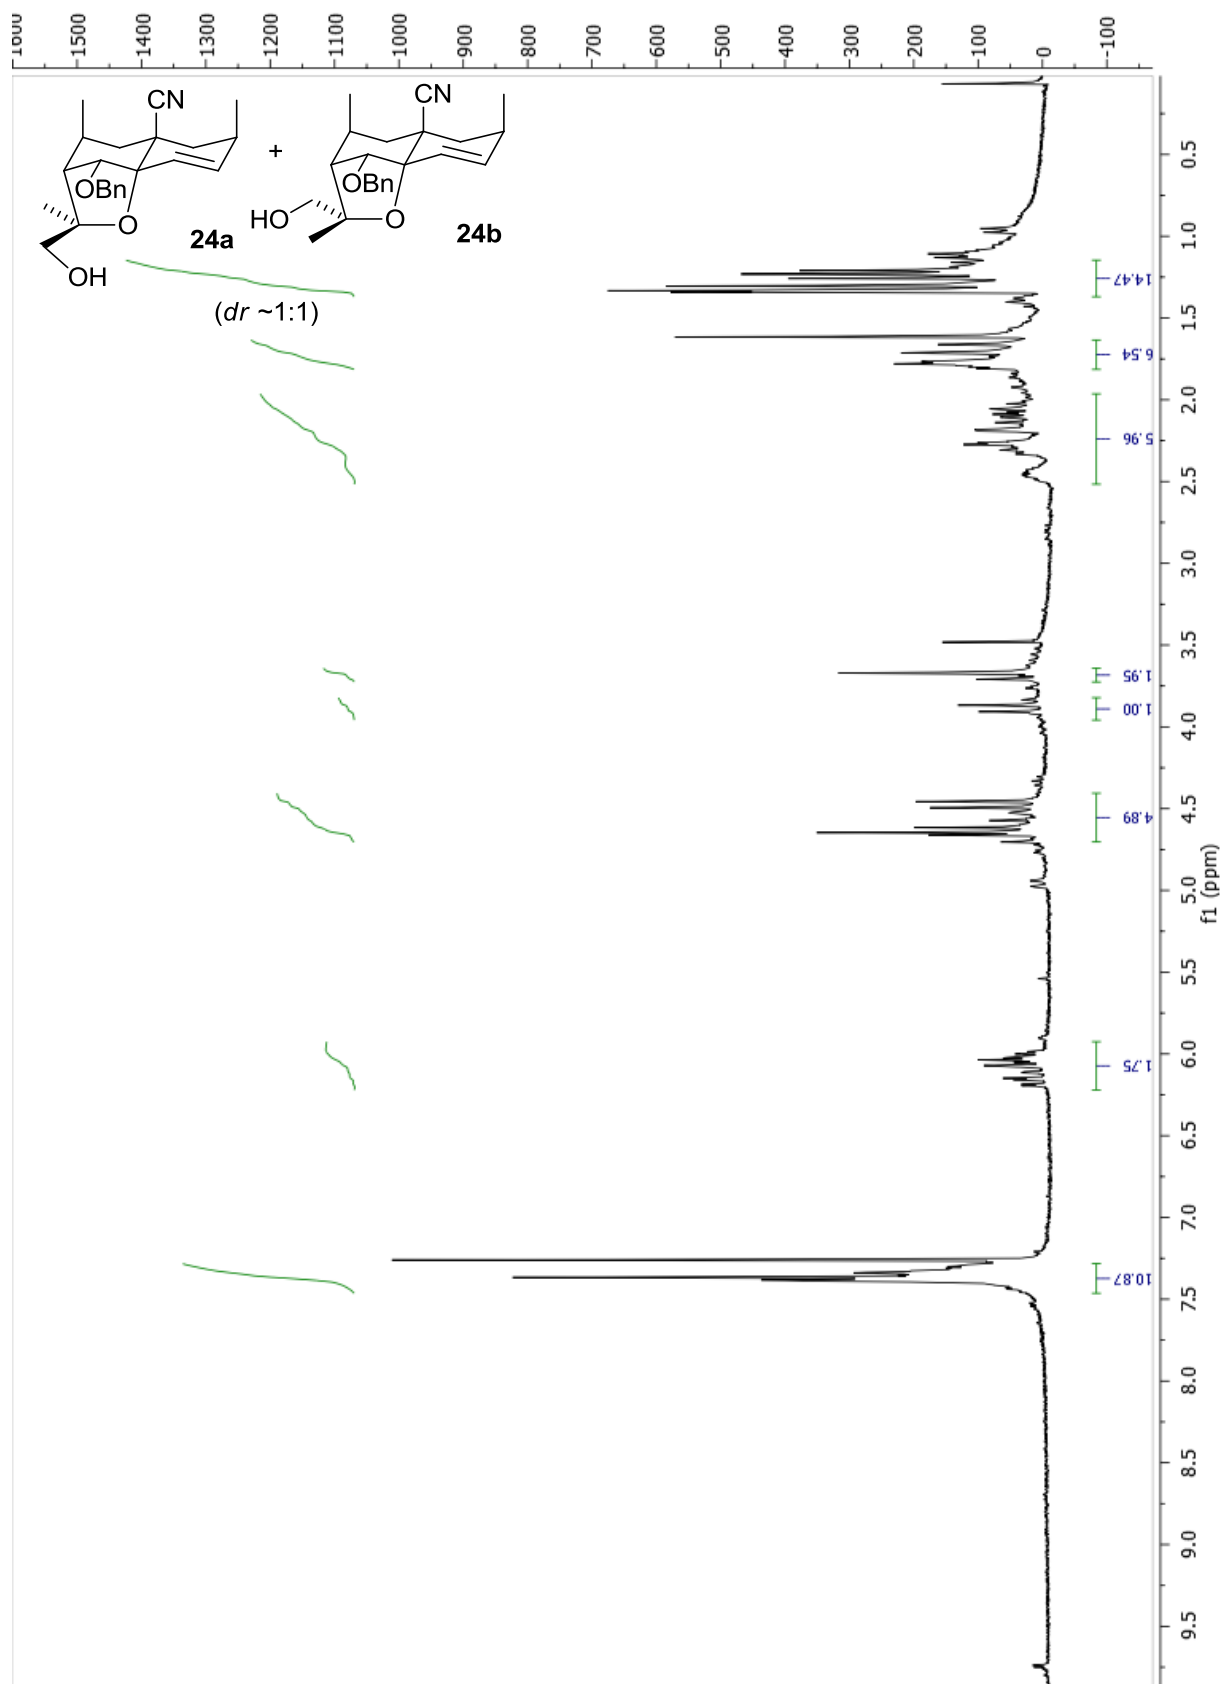

**bis-Epoxyde 25 – <sup>1</sup>H NMR (270 MHz)**

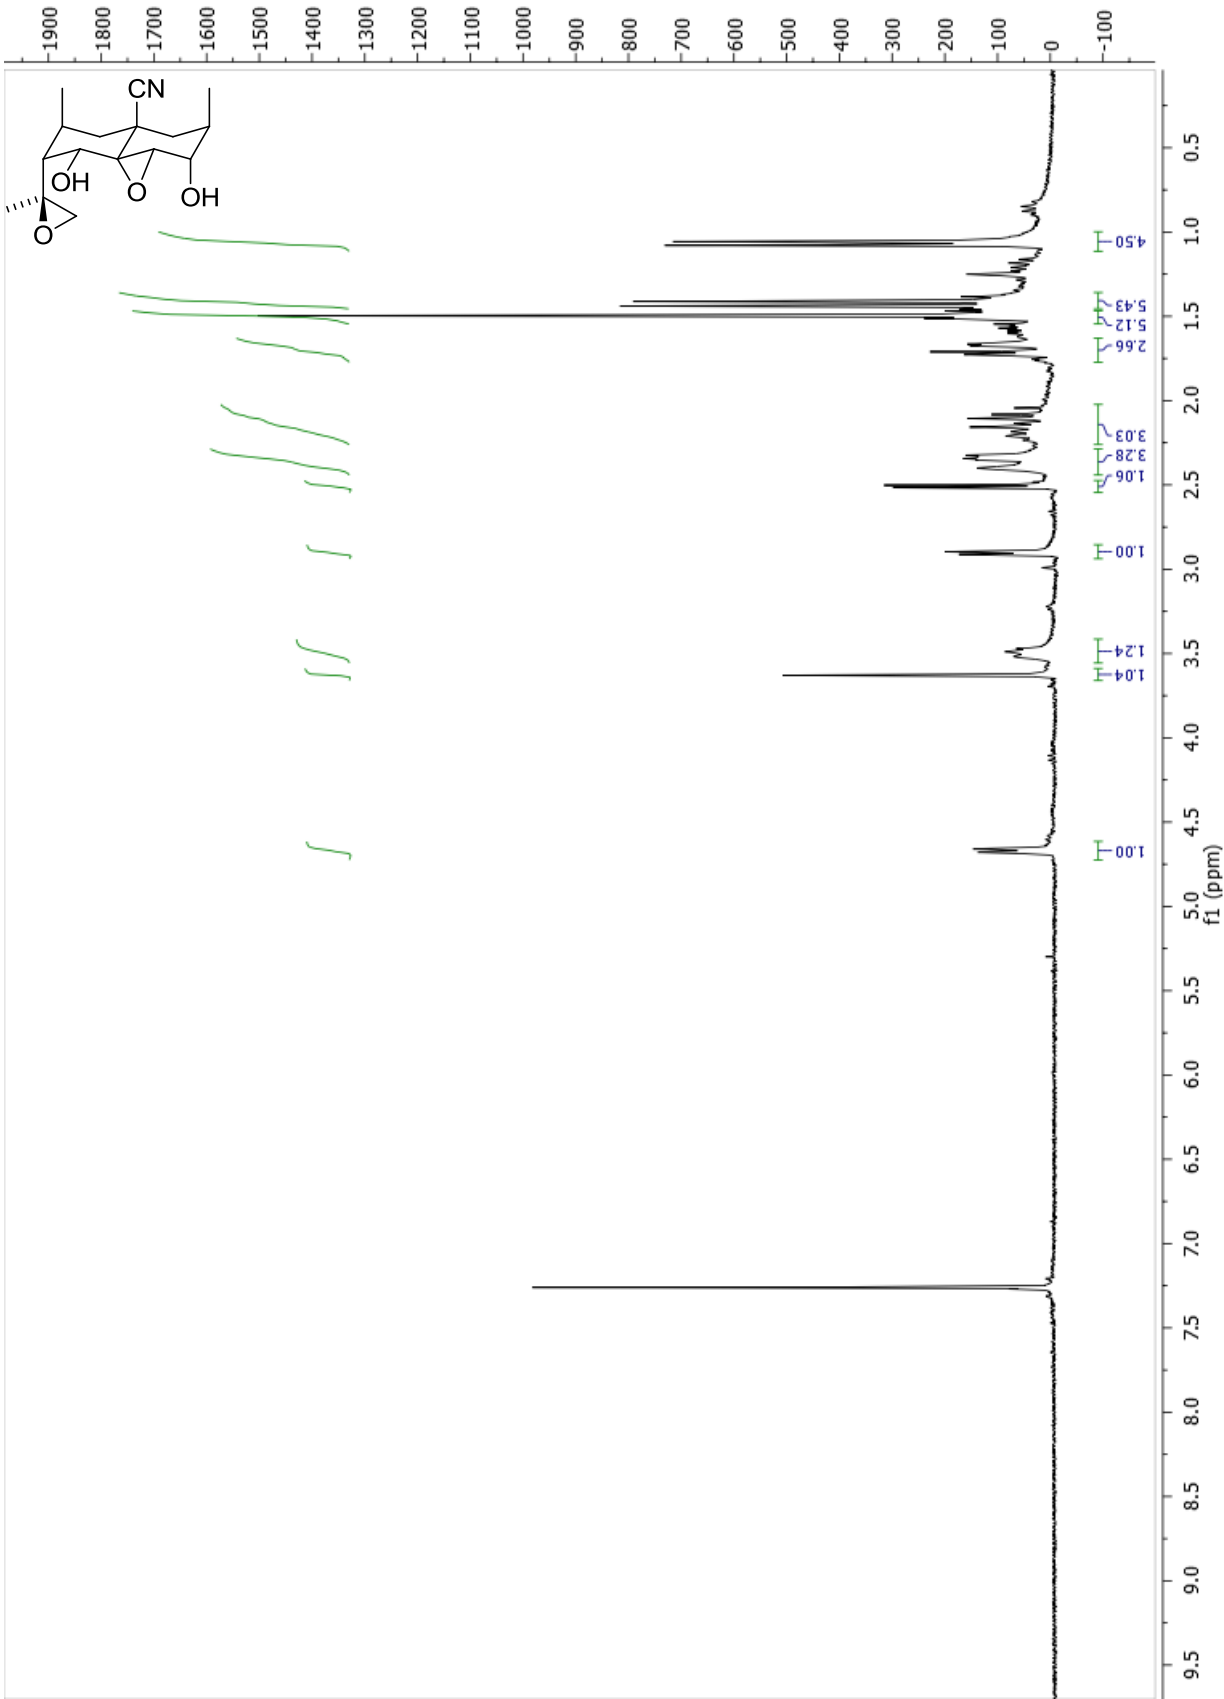

**bis-Epoxyde 25 – <sup>13</sup>C DEPT NMR (68 MHz)**

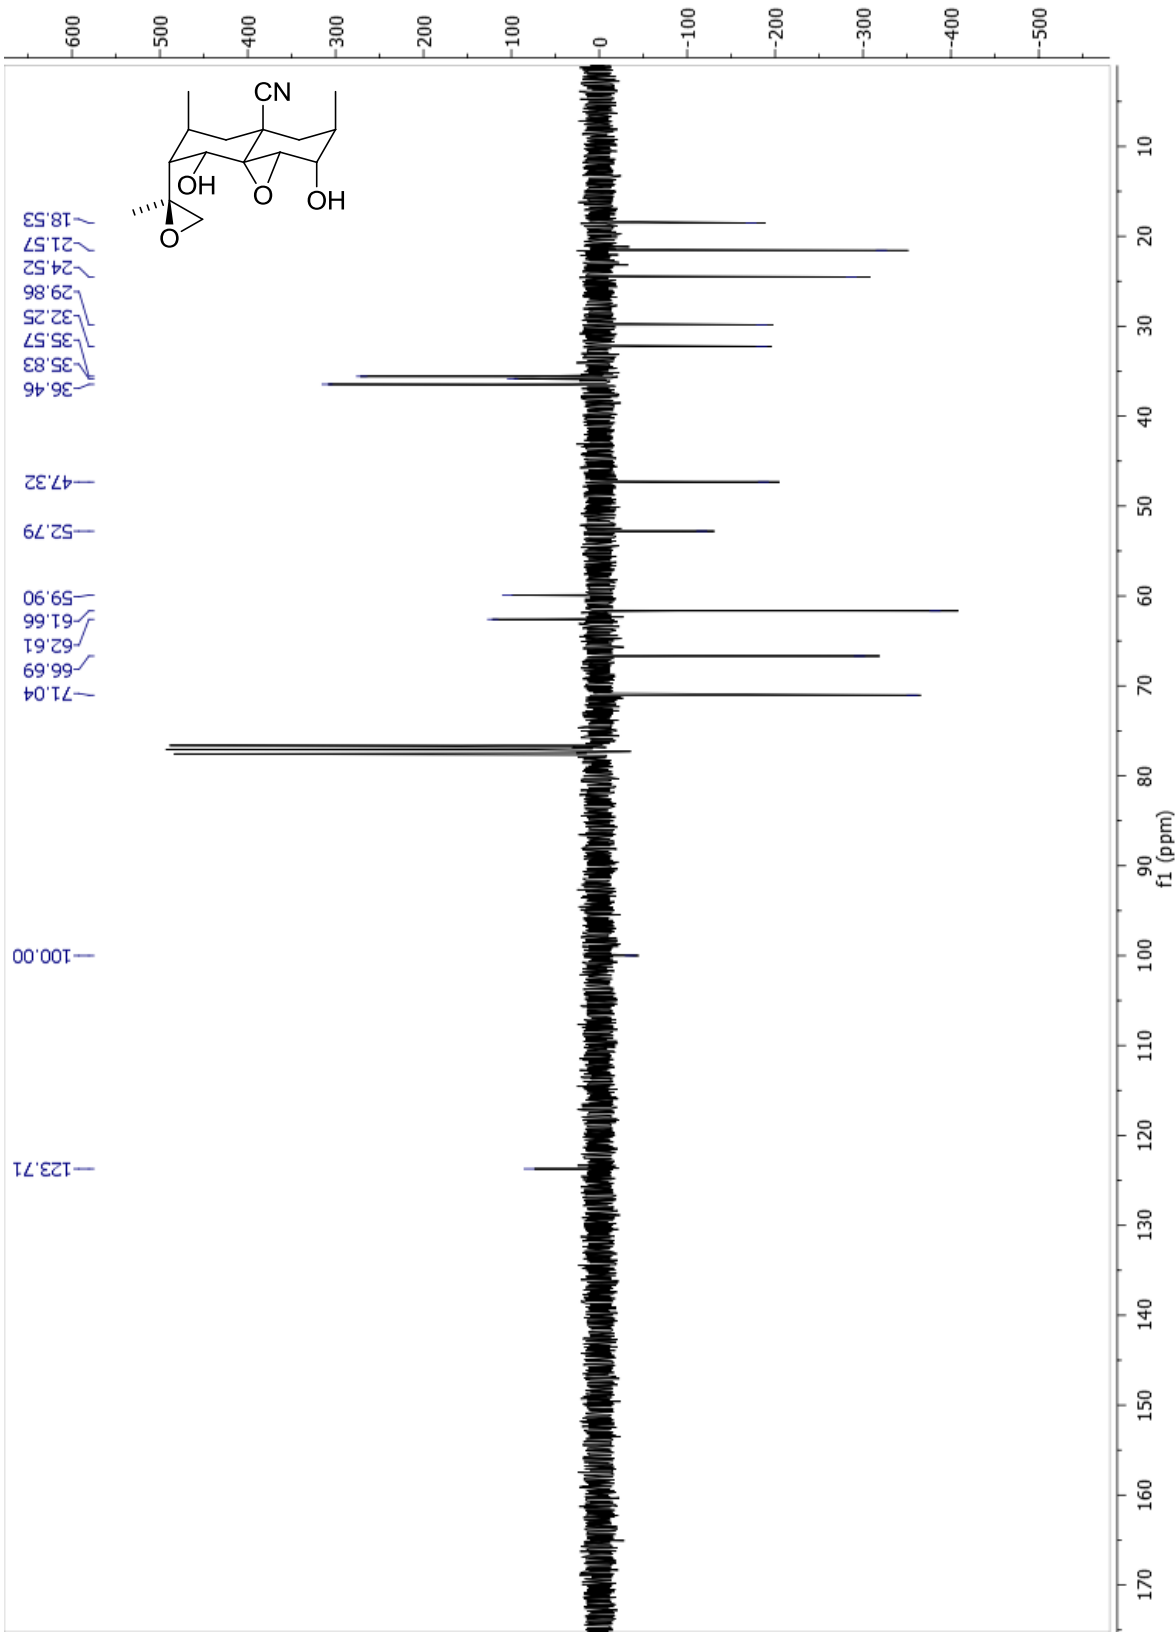



**$\beta$ -Dihydroagarofuran 26 –  $^1\text{H}$  NMR (400 MHz)**

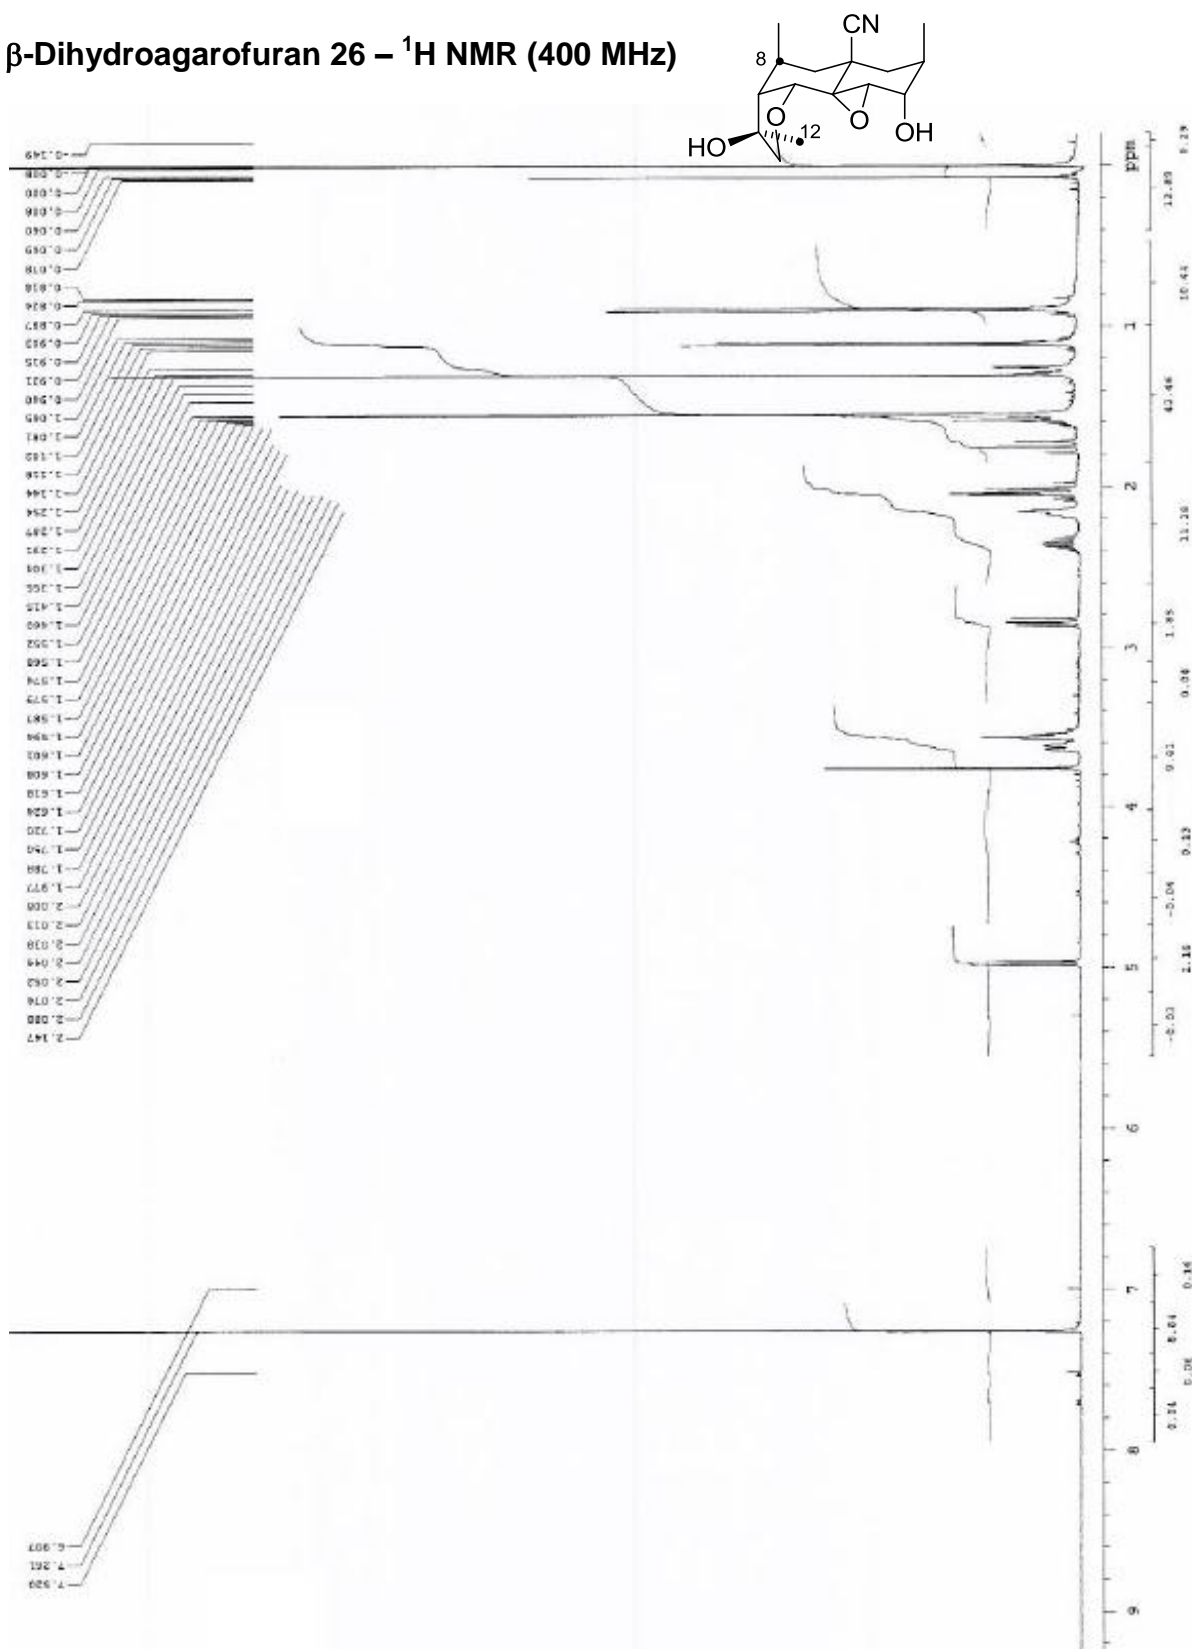

$\beta$ -Dihydroagarofuran 26 –  $^{13}\text{C}$  NMR (100 MHz)

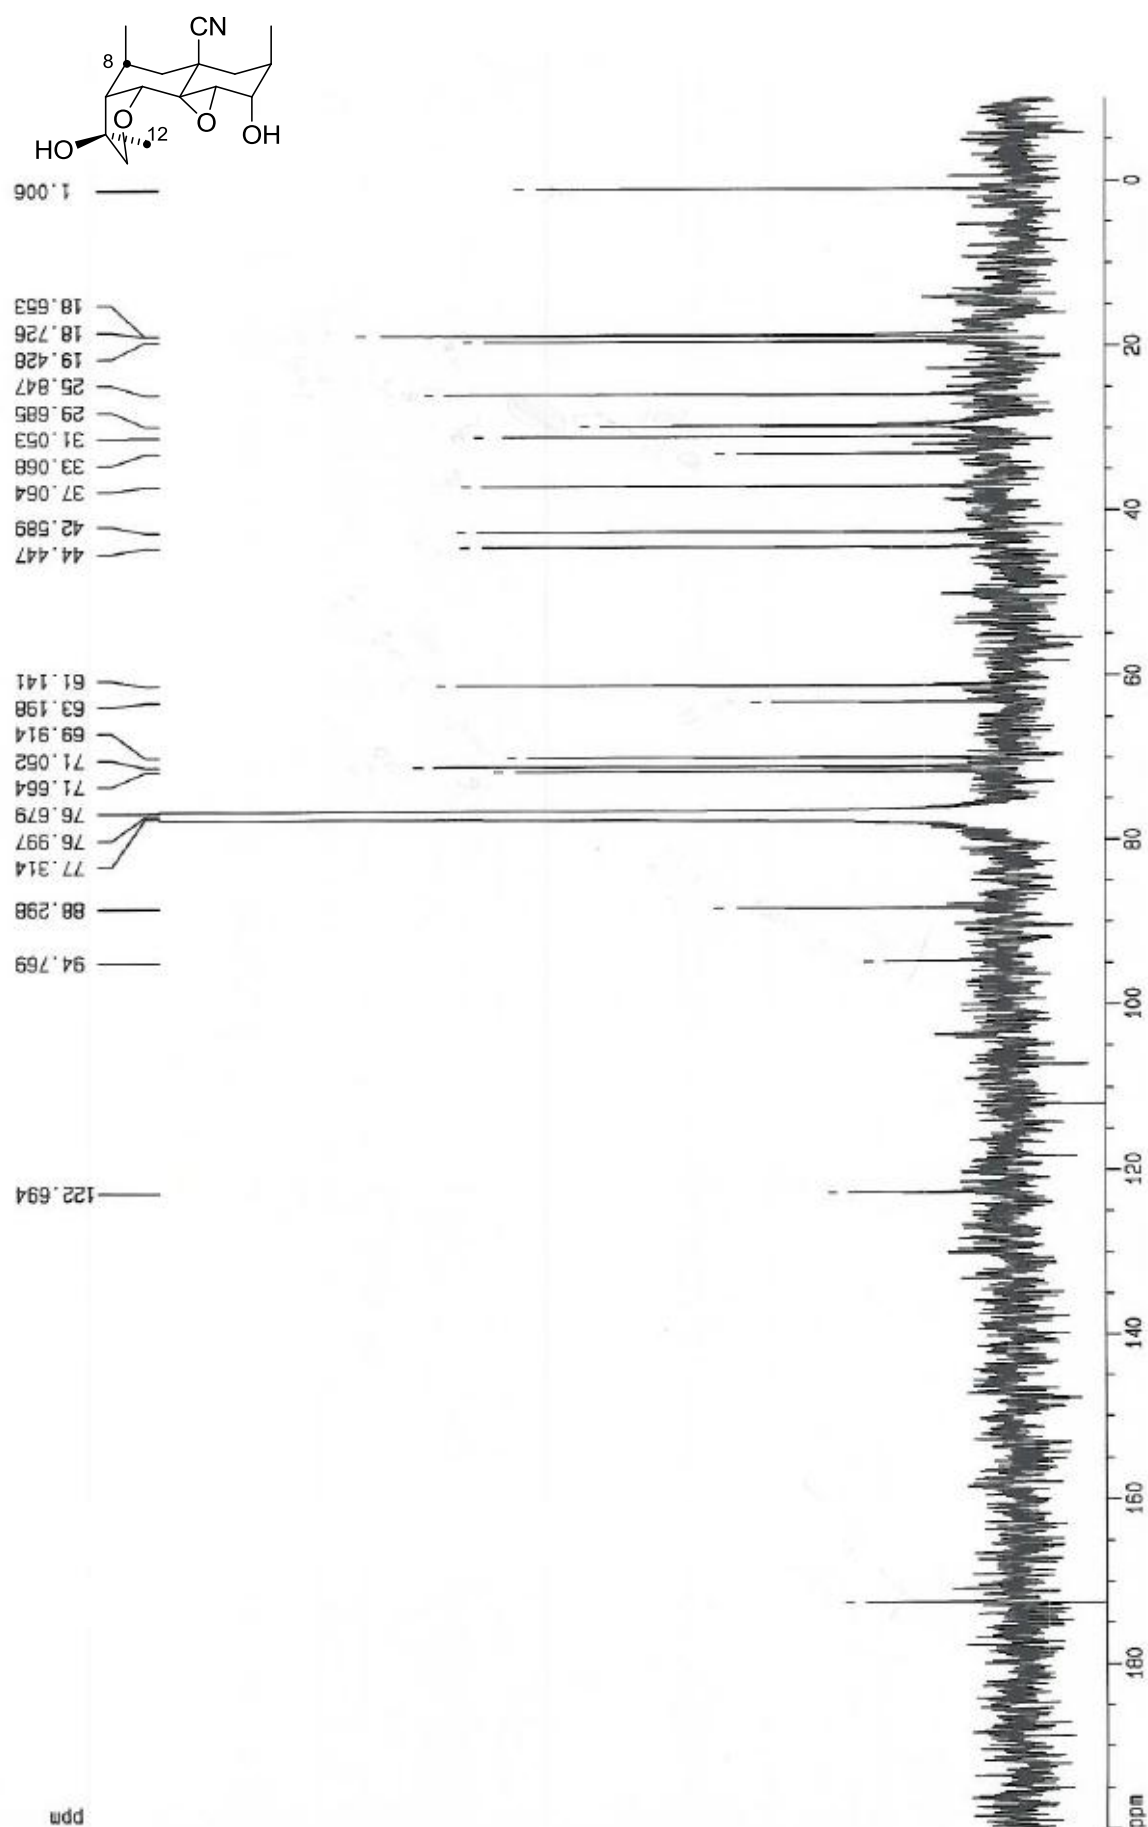

**β-Dihydroagarofuran 26 – NOESY (400 MHz)**

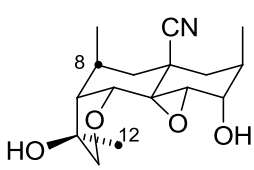

| NOESY | 8                          | 12 |
|-------|----------------------------|----|
| 8     | -                          | ✓  |
| 12    | ✓ <input type="checkbox"/> | -  |

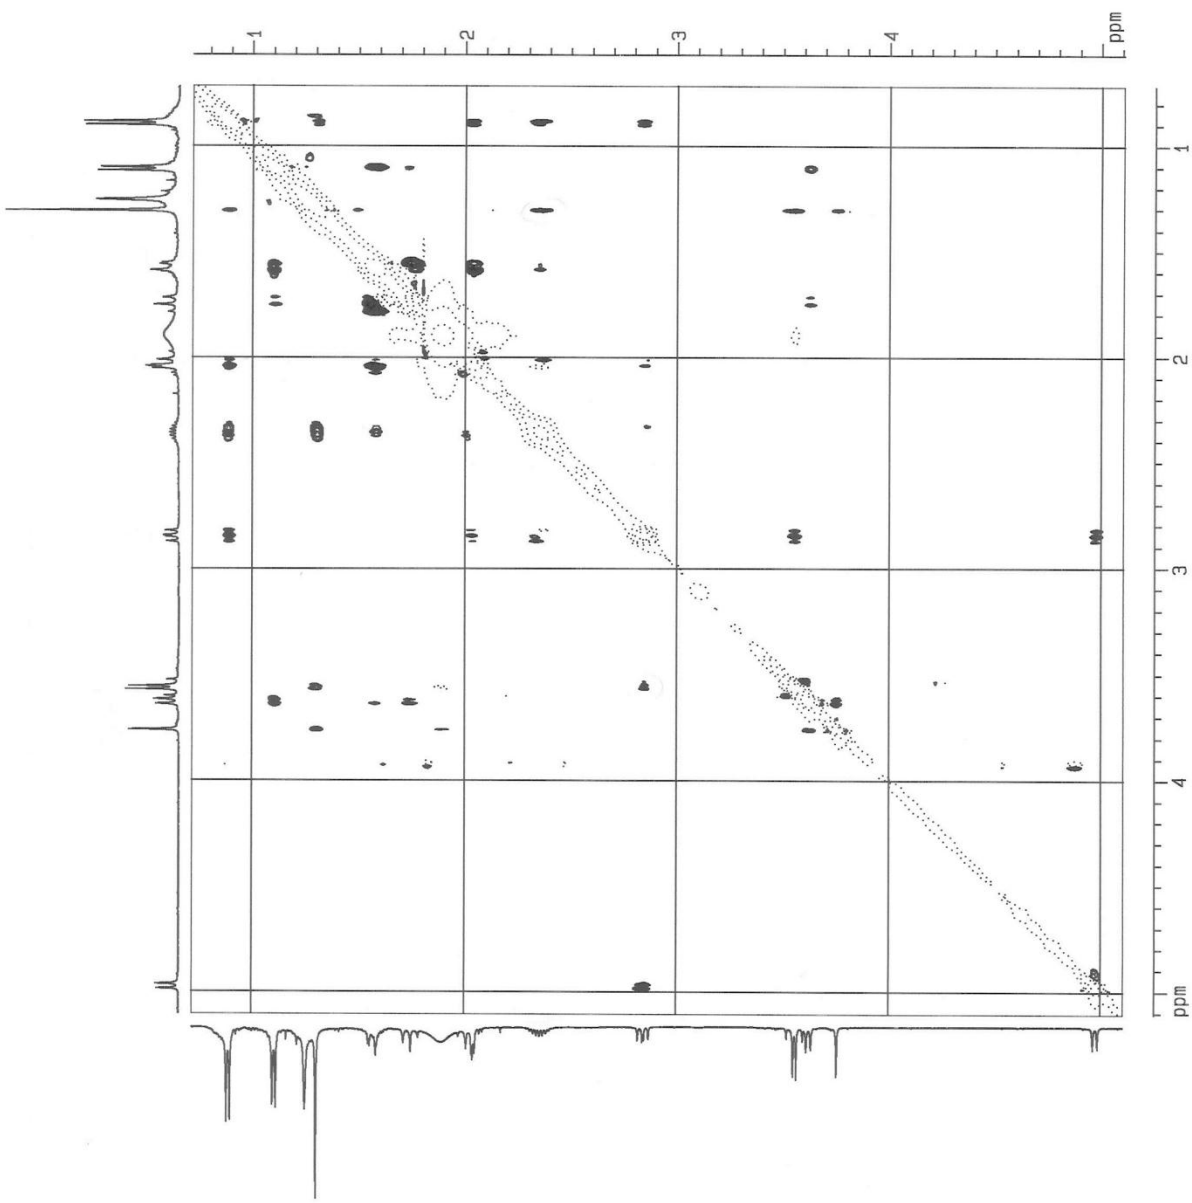

**β-Dihydroagarofuran 26 – COSY (400 MHz)**

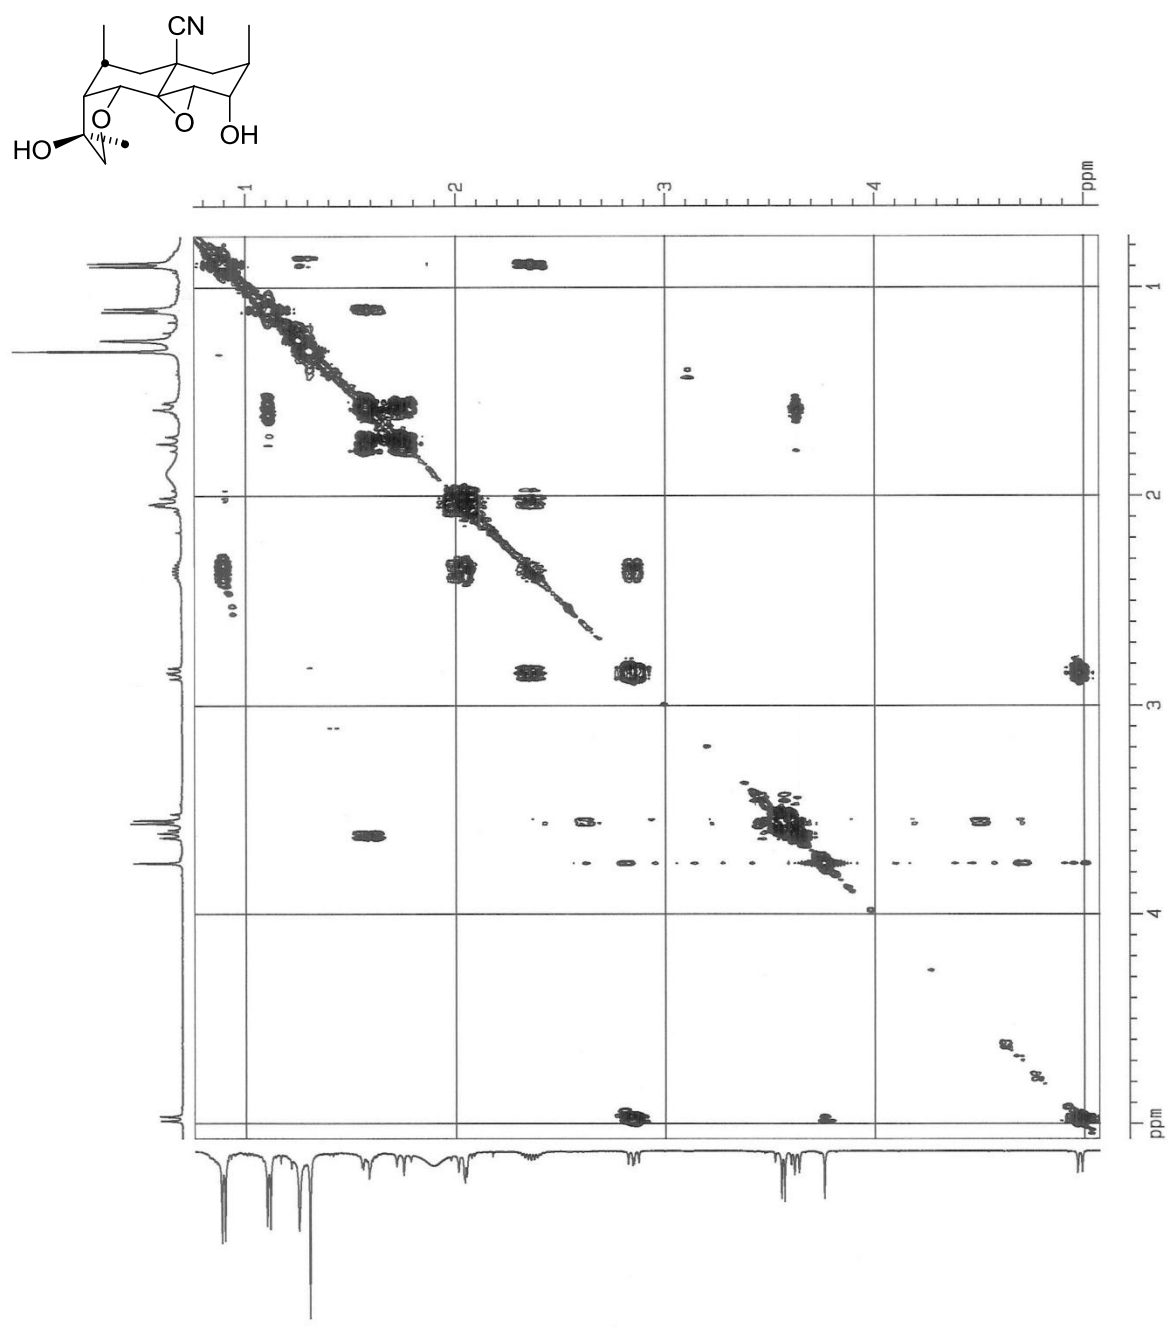

**β-Dihydroagarofuran 26 – HMBC (400 MHz)**

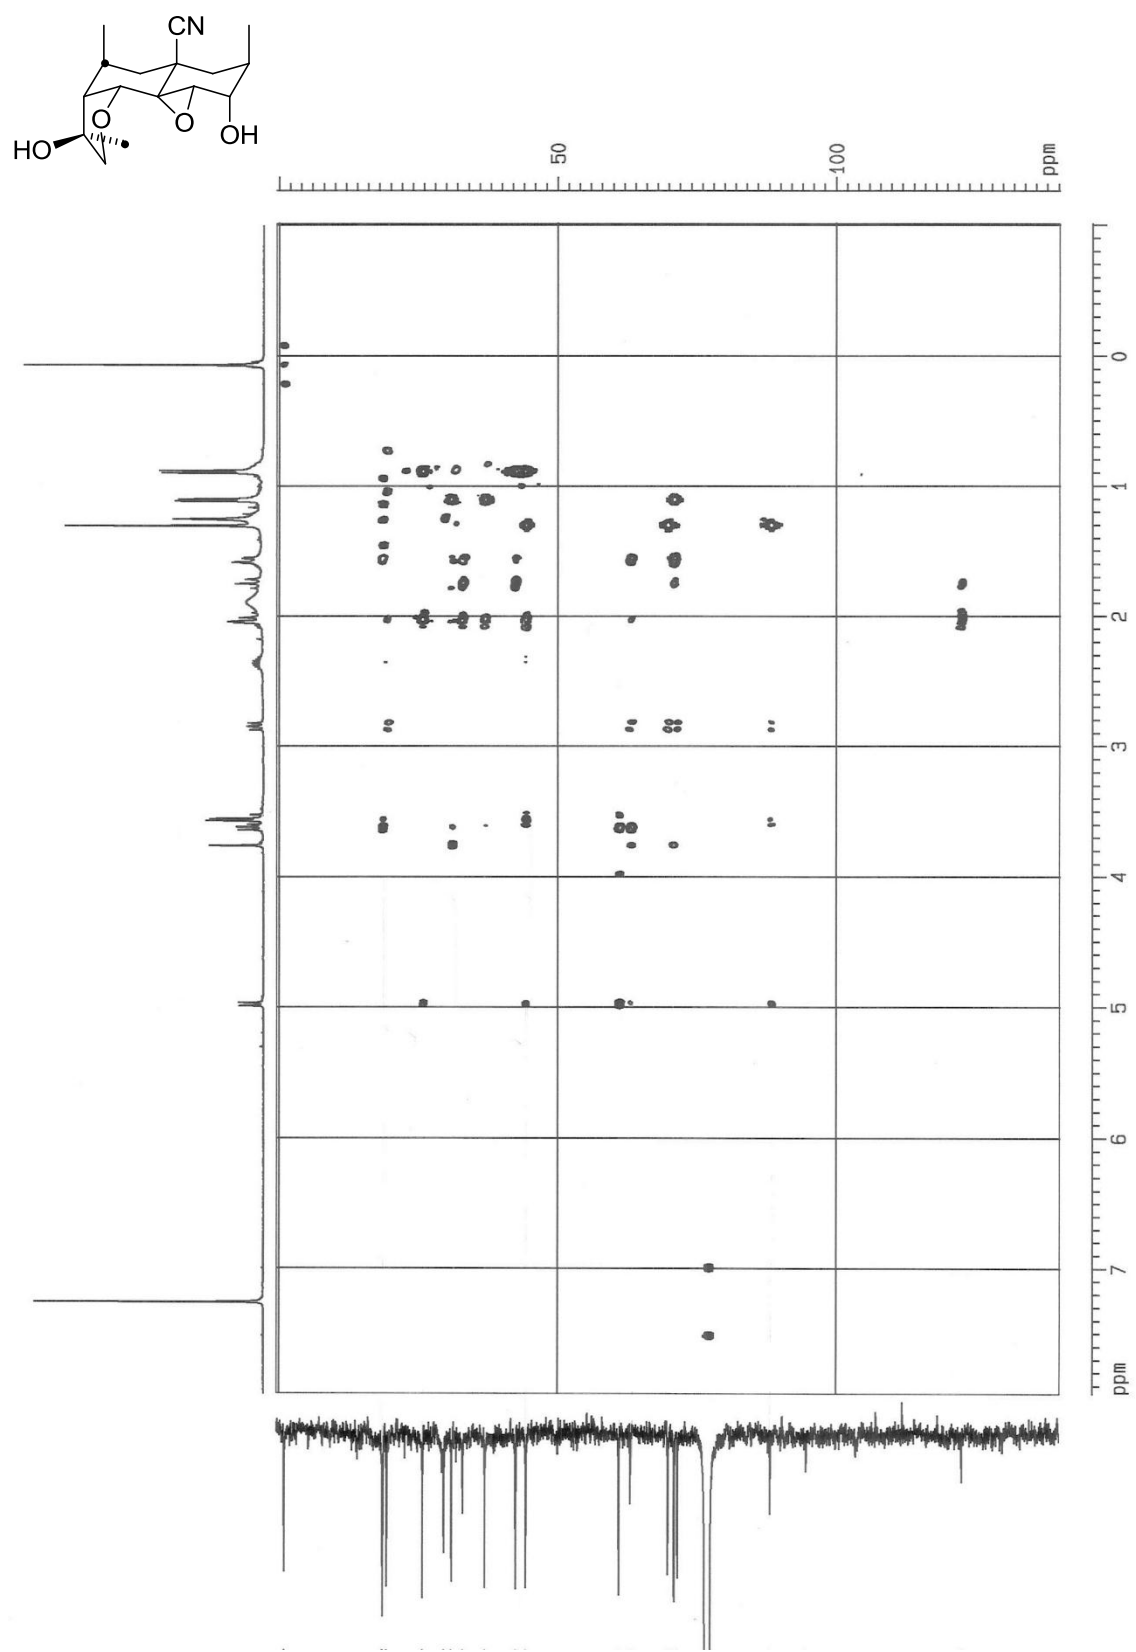

**$\beta$ -Dihydroagarofuran 26 – HMQC (400 MHz)**

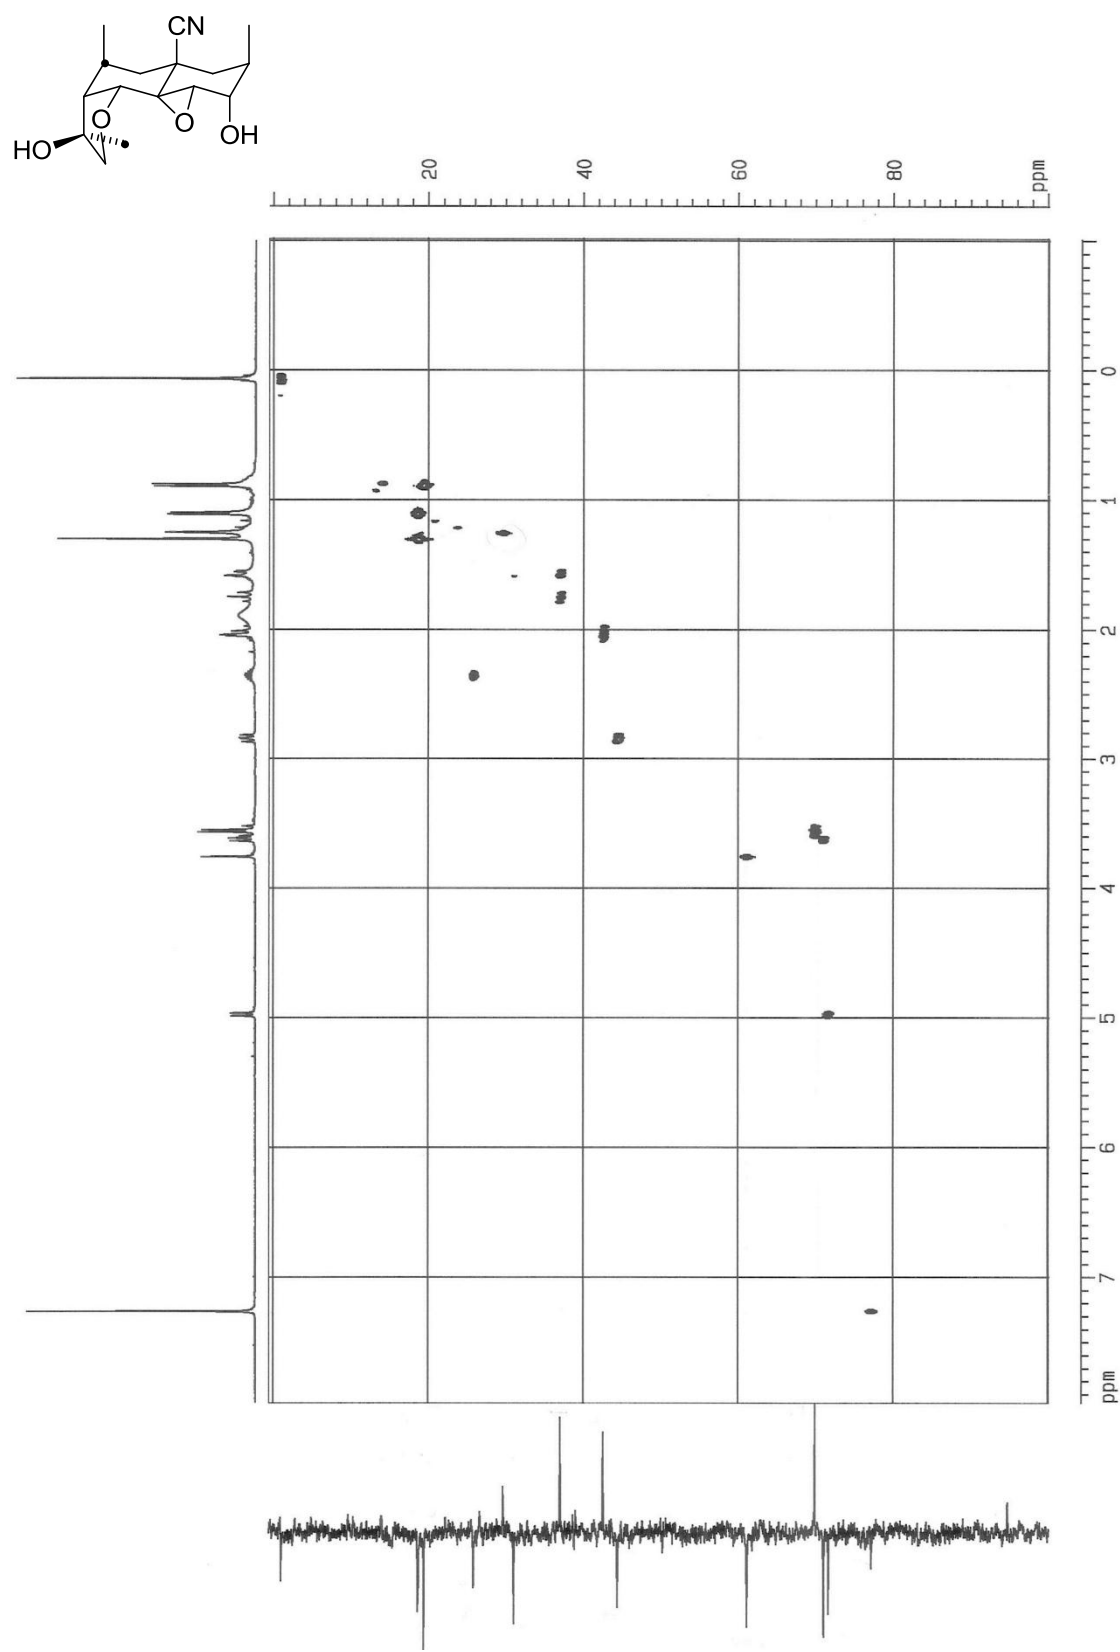

Lactate ester 27 – <sup>1</sup>H NMR (400 MHz)

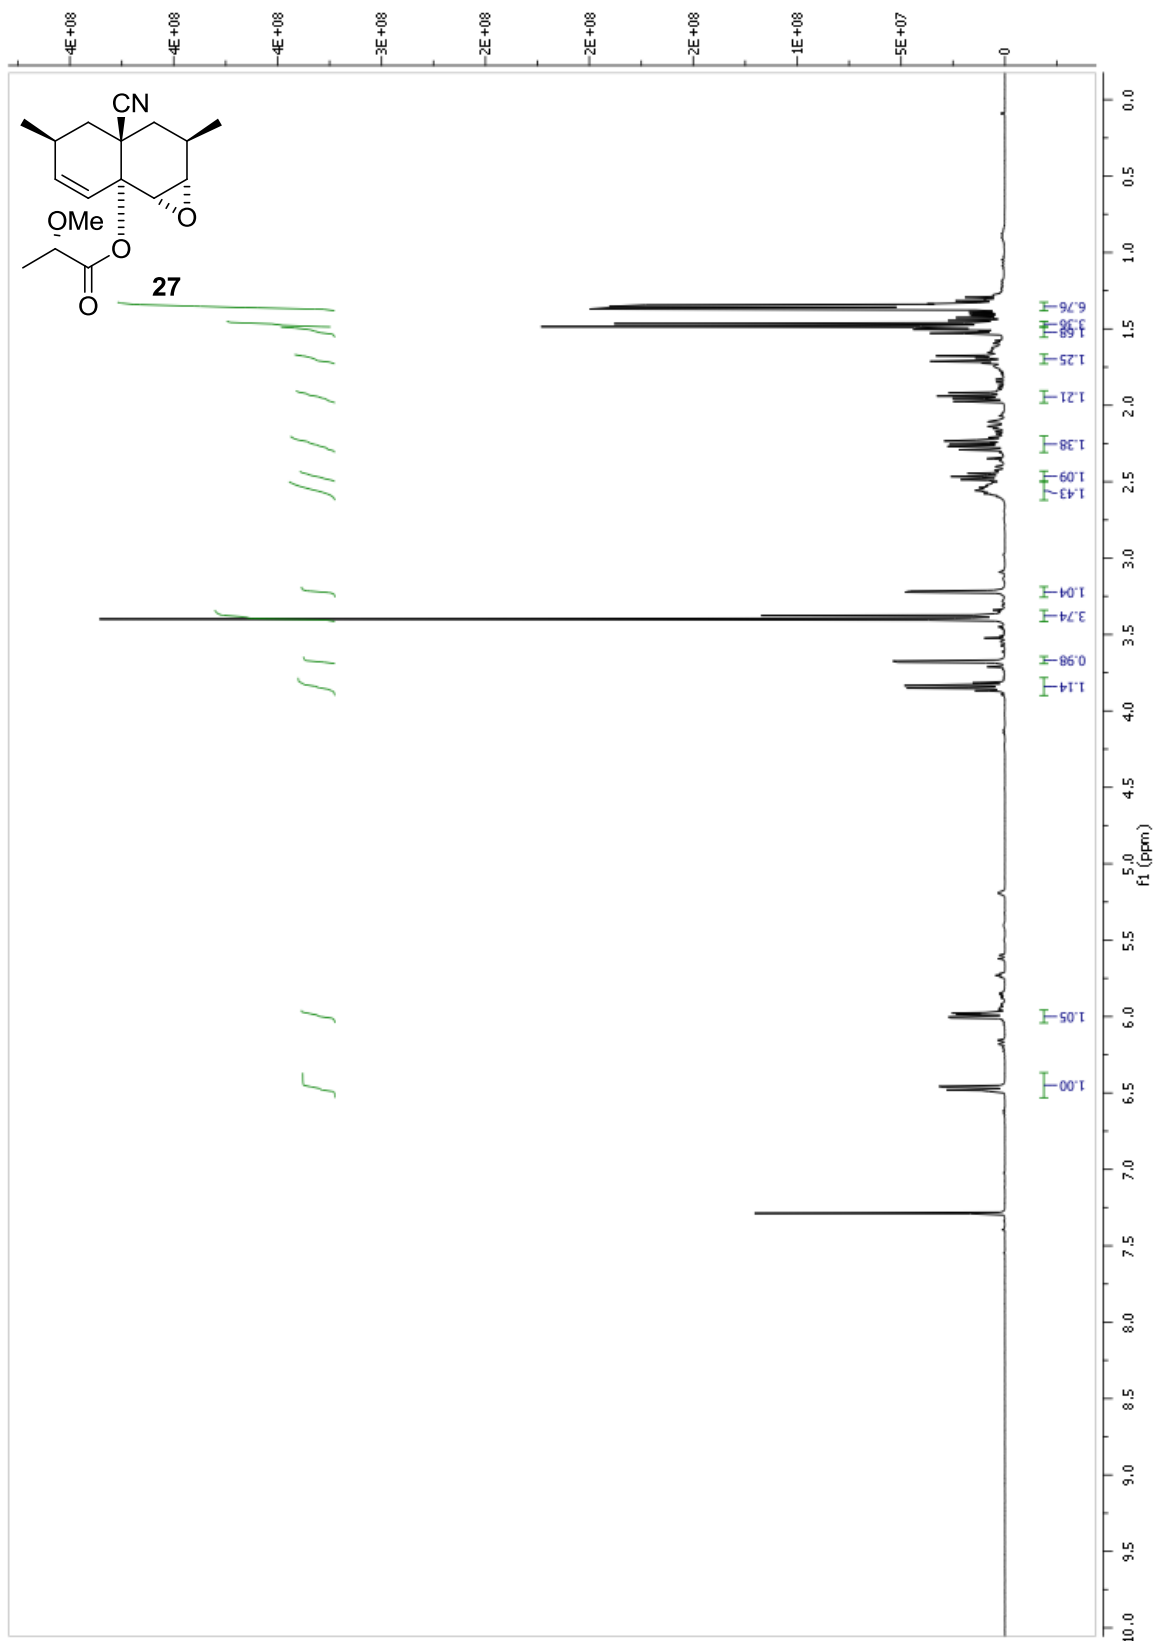

Lactate ester 27 – <sup>13</sup>C NMR (125 MHz)

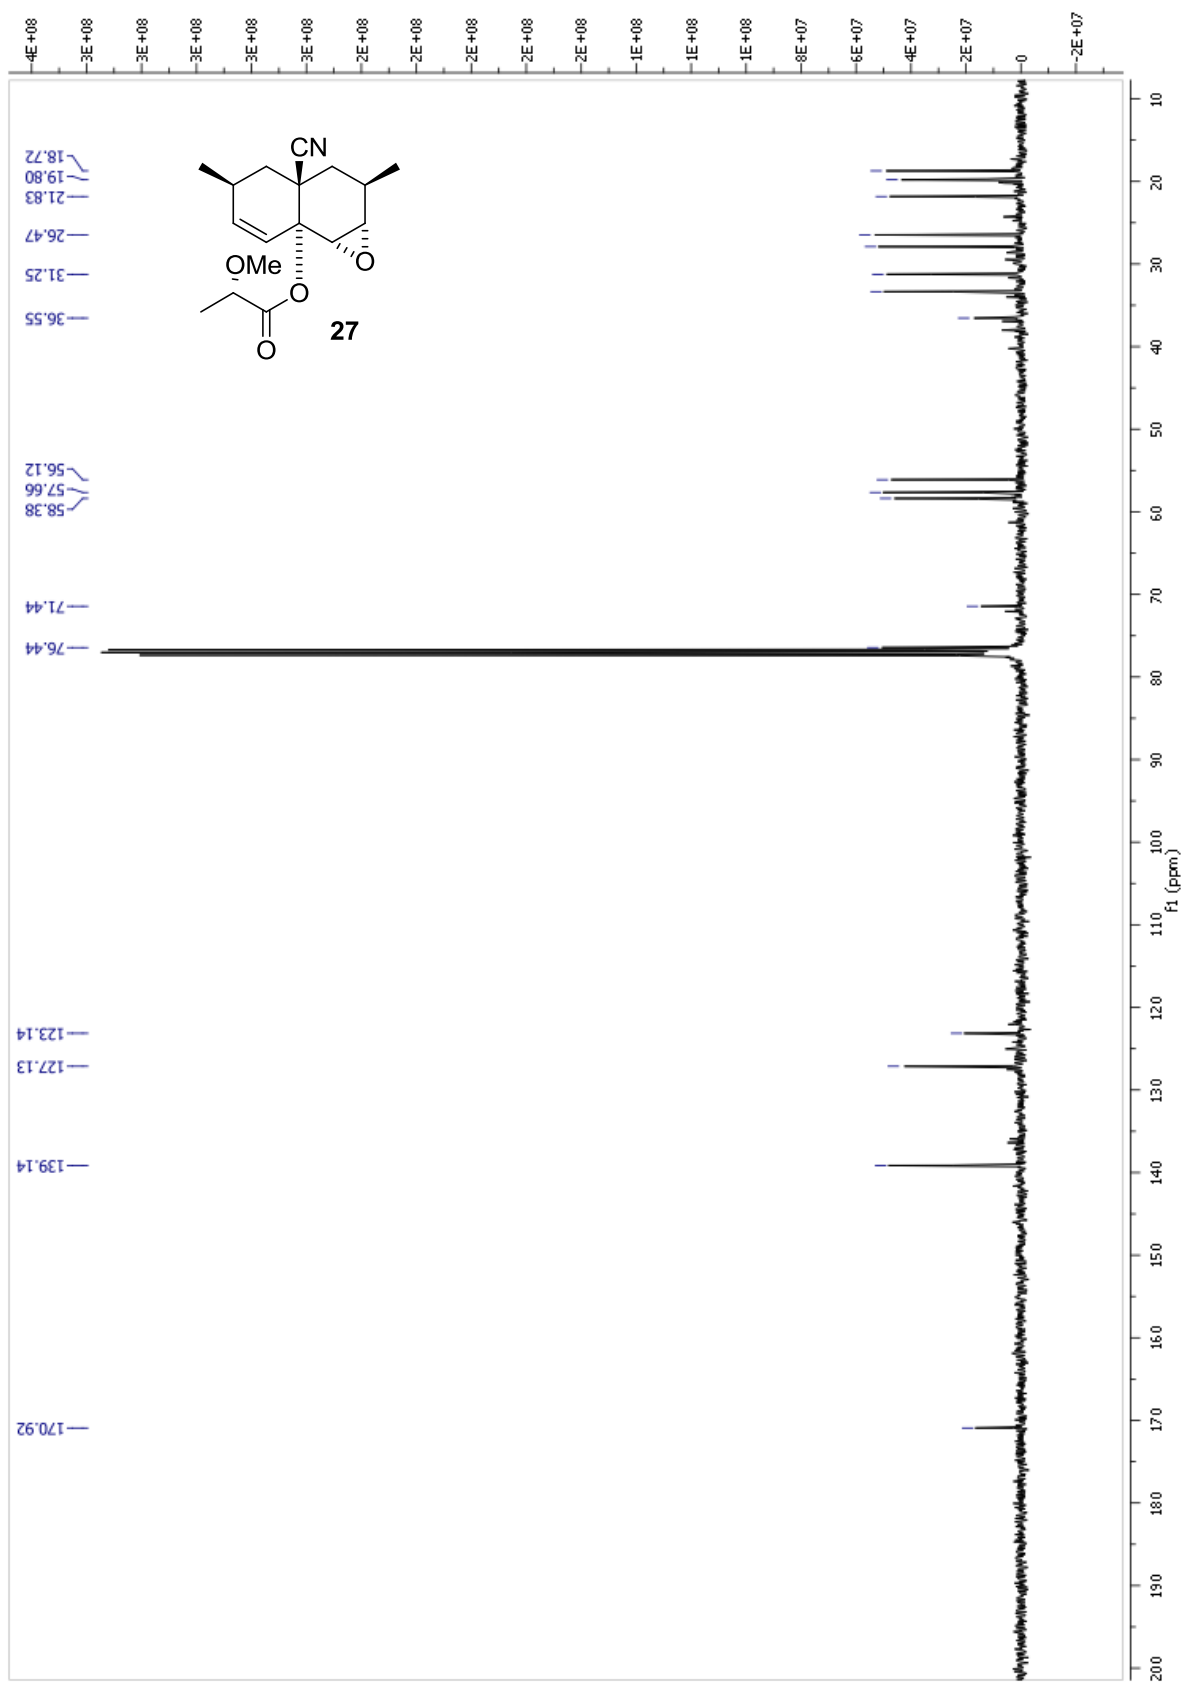



# Lactone 28a – $^1\text{H}$ NMR (400 MHz)

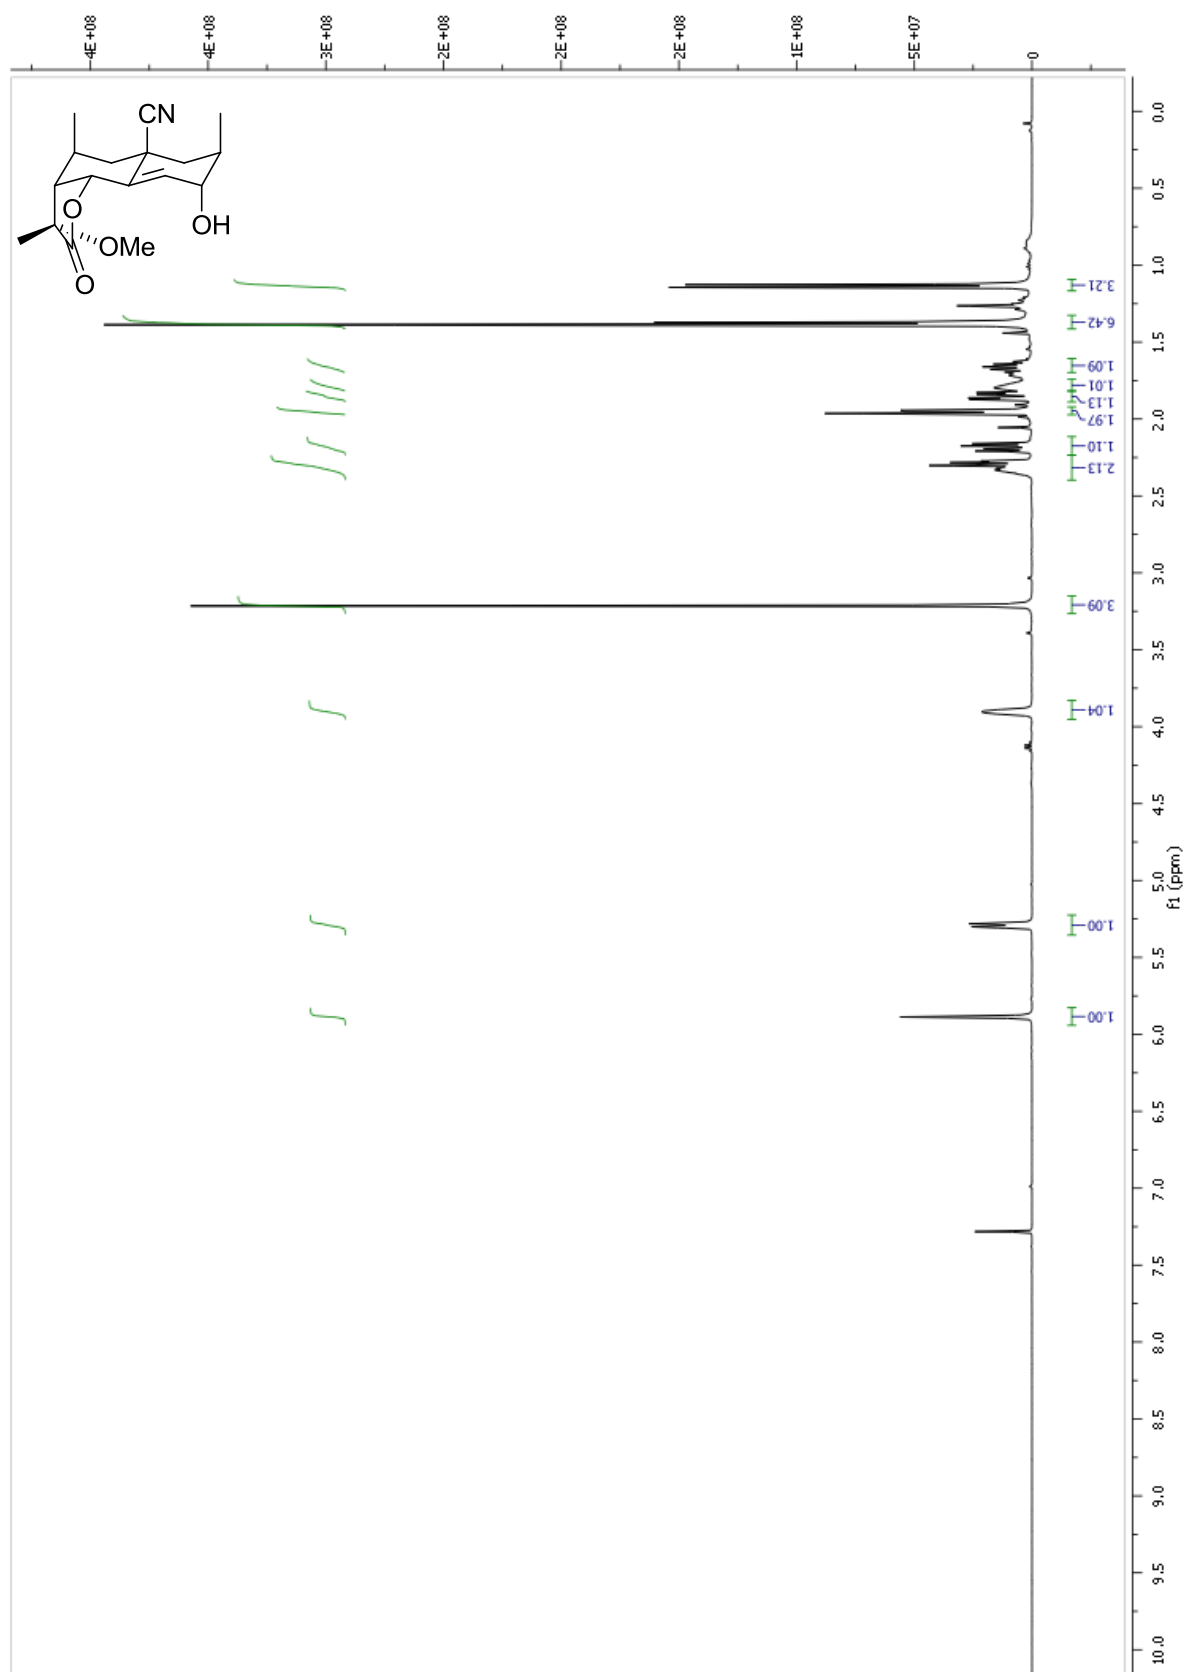

Lactone 28a – <sup>13</sup>C NMR (100 MHz)

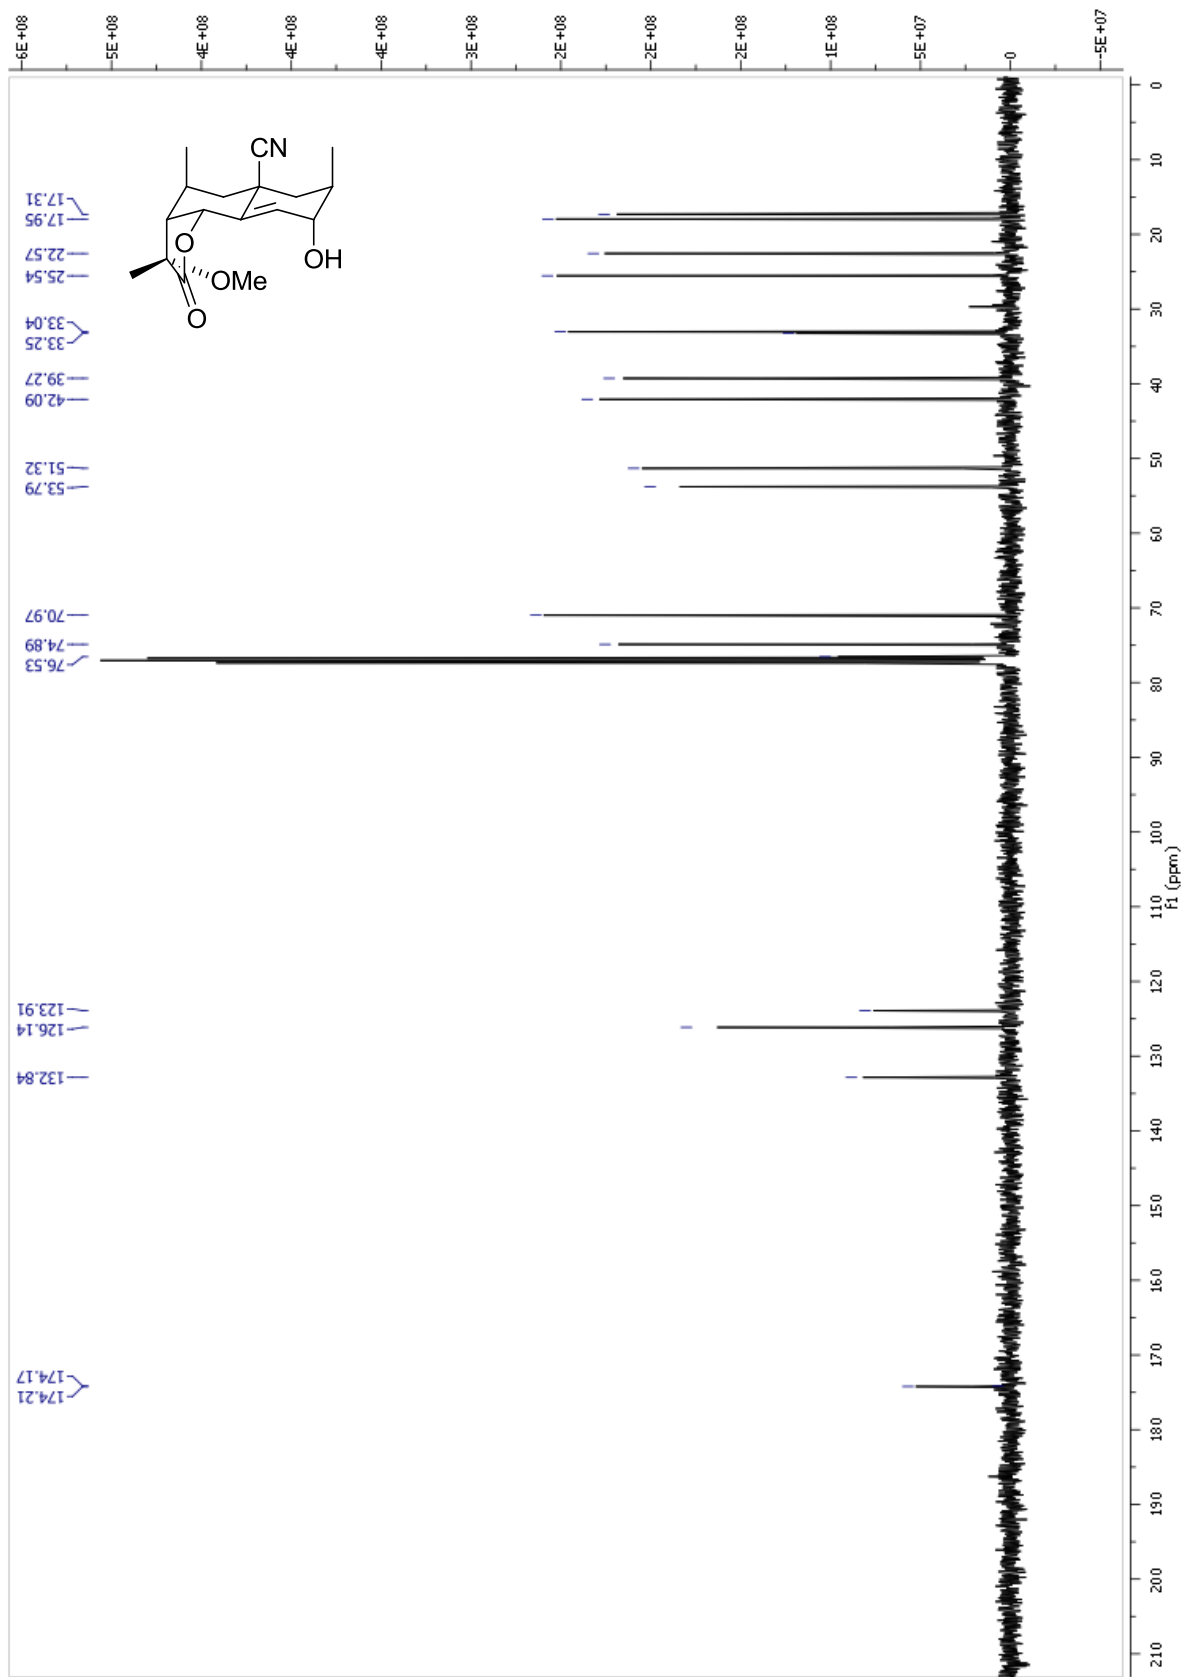

Lactone 28b – <sup>1</sup>H NMR (400 MHz)

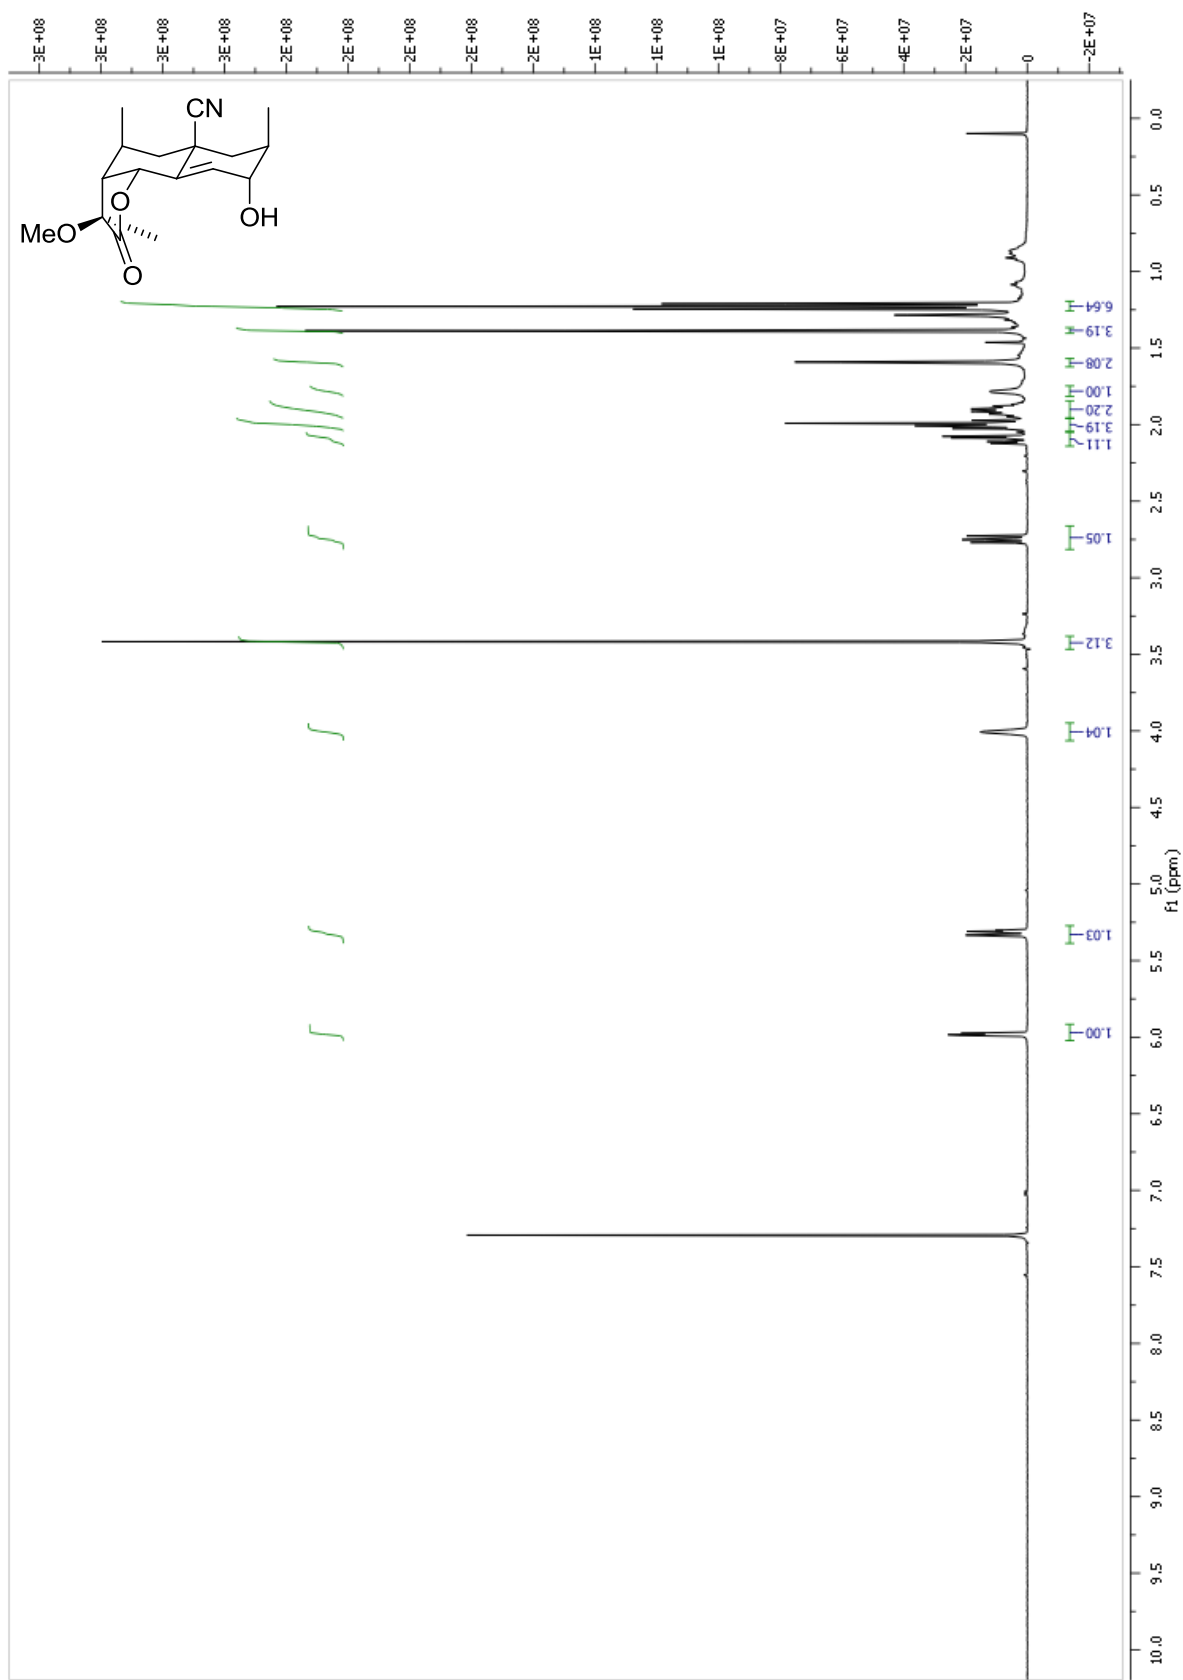

Lactone 28b – <sup>13</sup>C NMR (100 MHz)

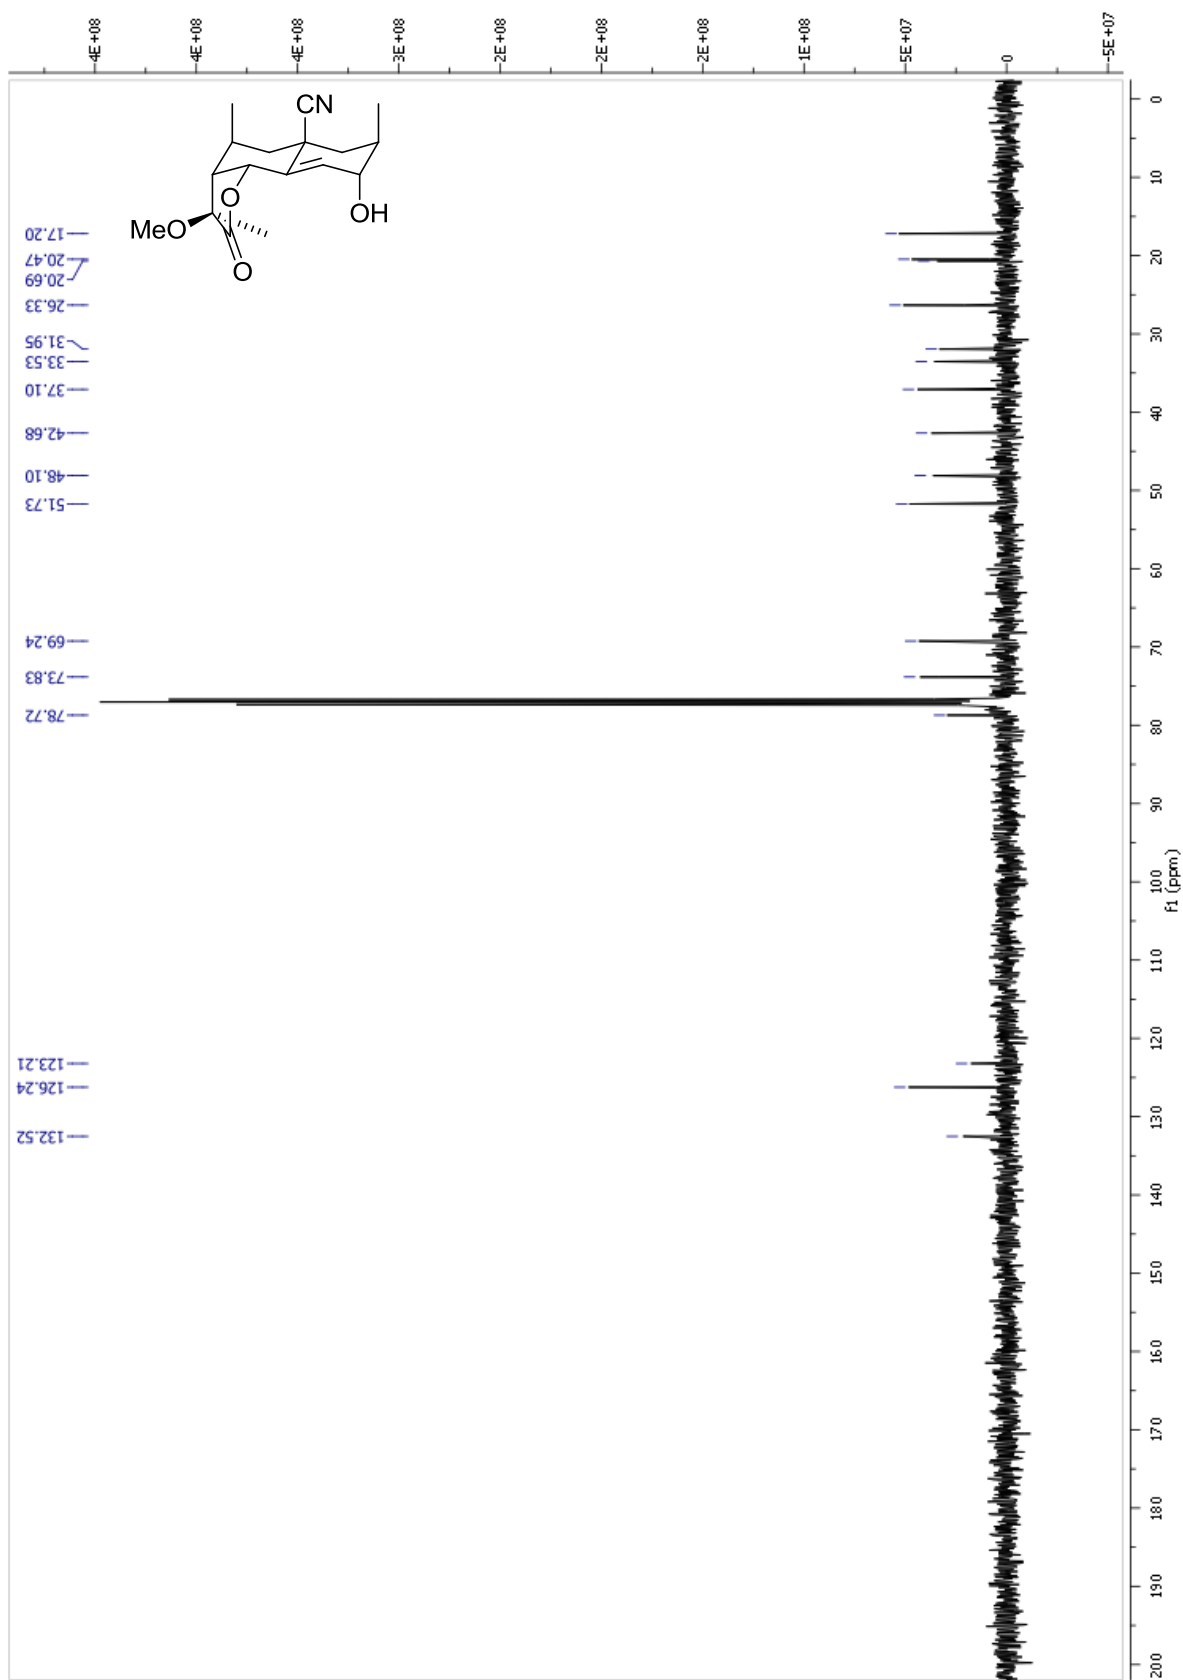

Methyl ester 29 – <sup>1</sup>H NMR (400 MHz)

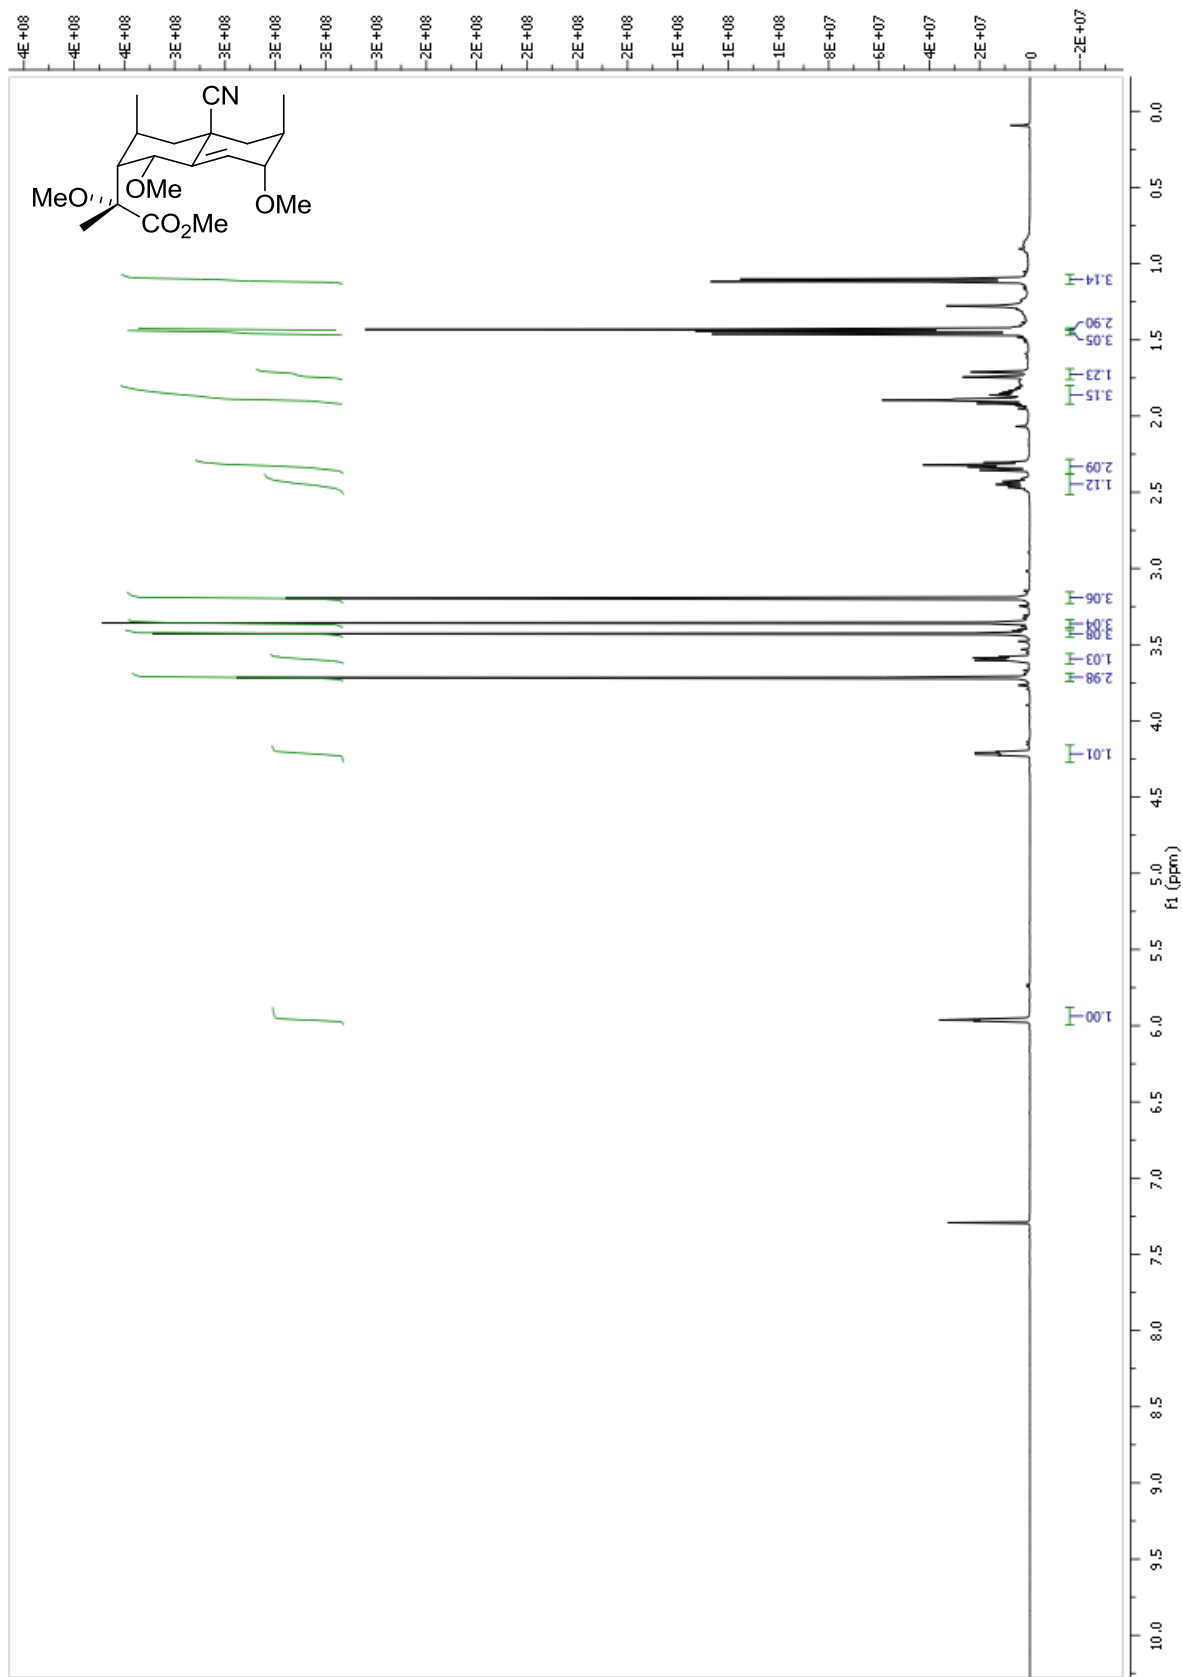

Methyl ester 29 – <sup>13</sup>C NMR (100 MHz)

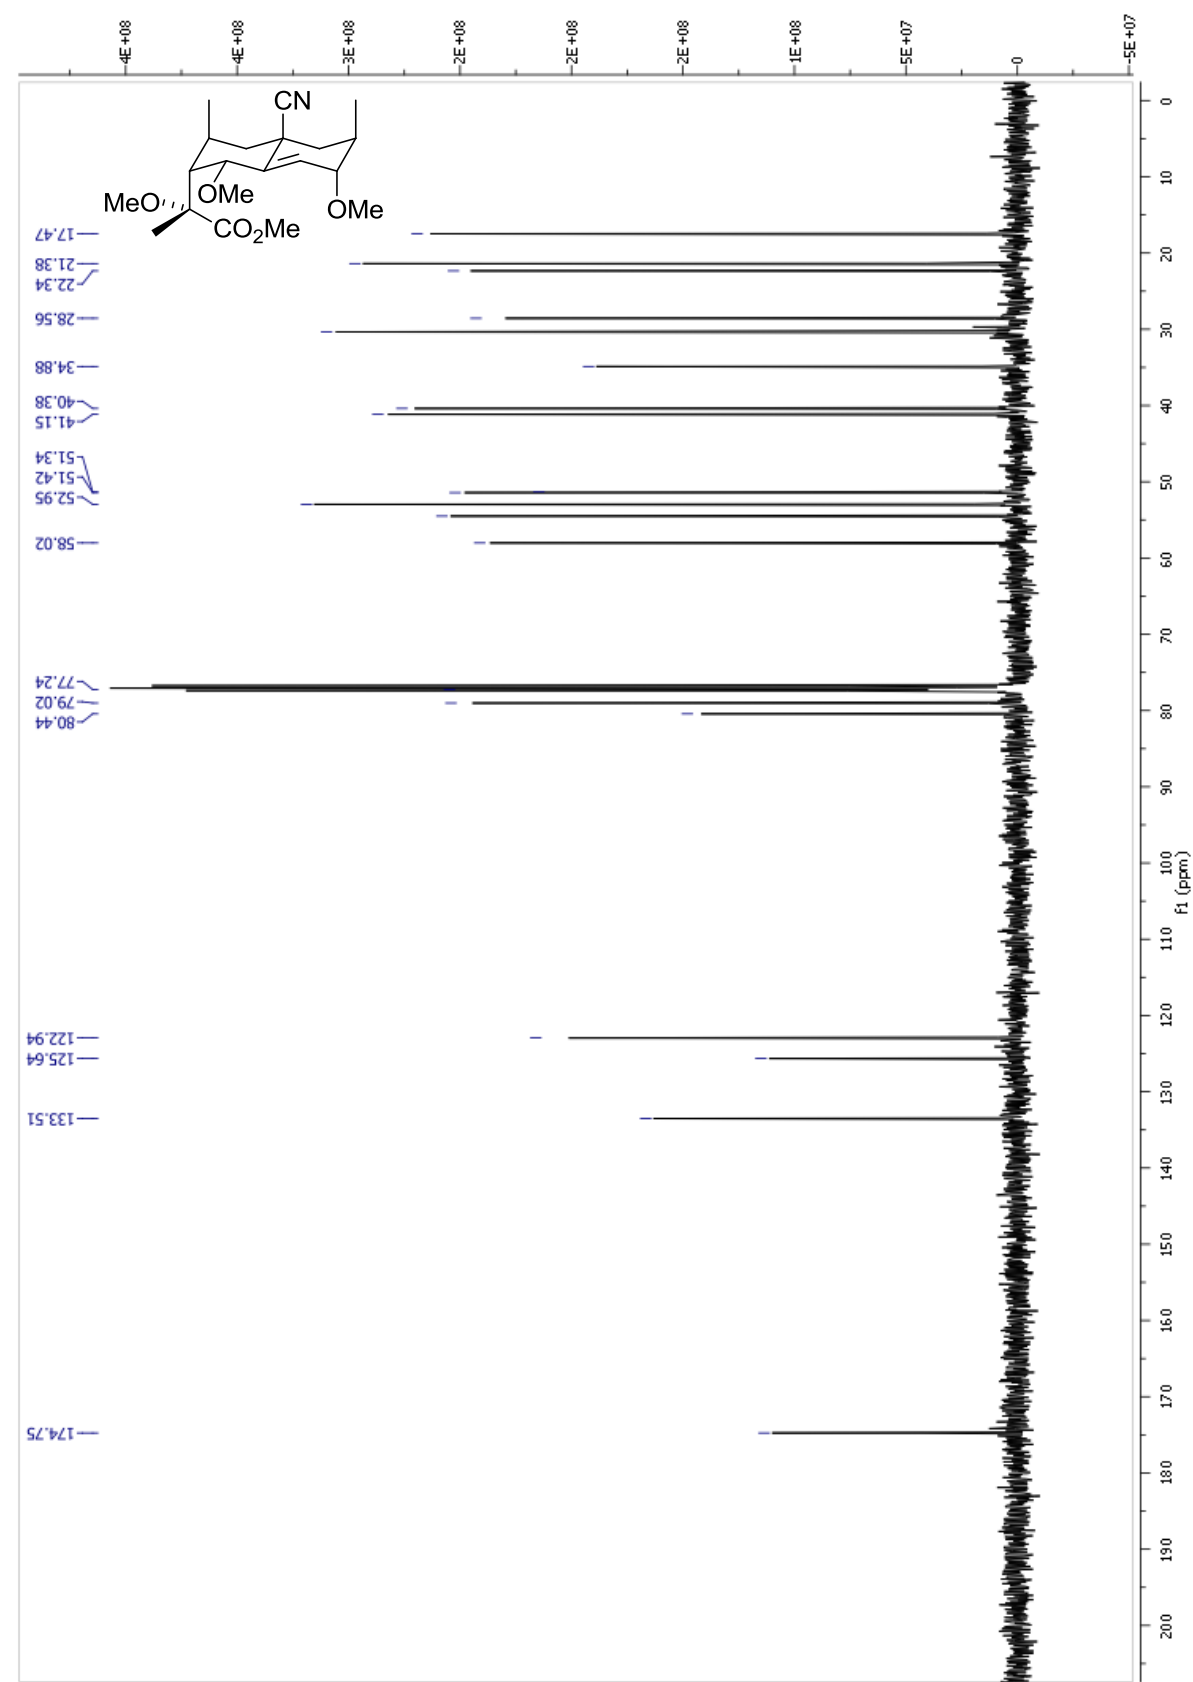

Epoxide 30 – <sup>1</sup>H NMR (400 MHz)

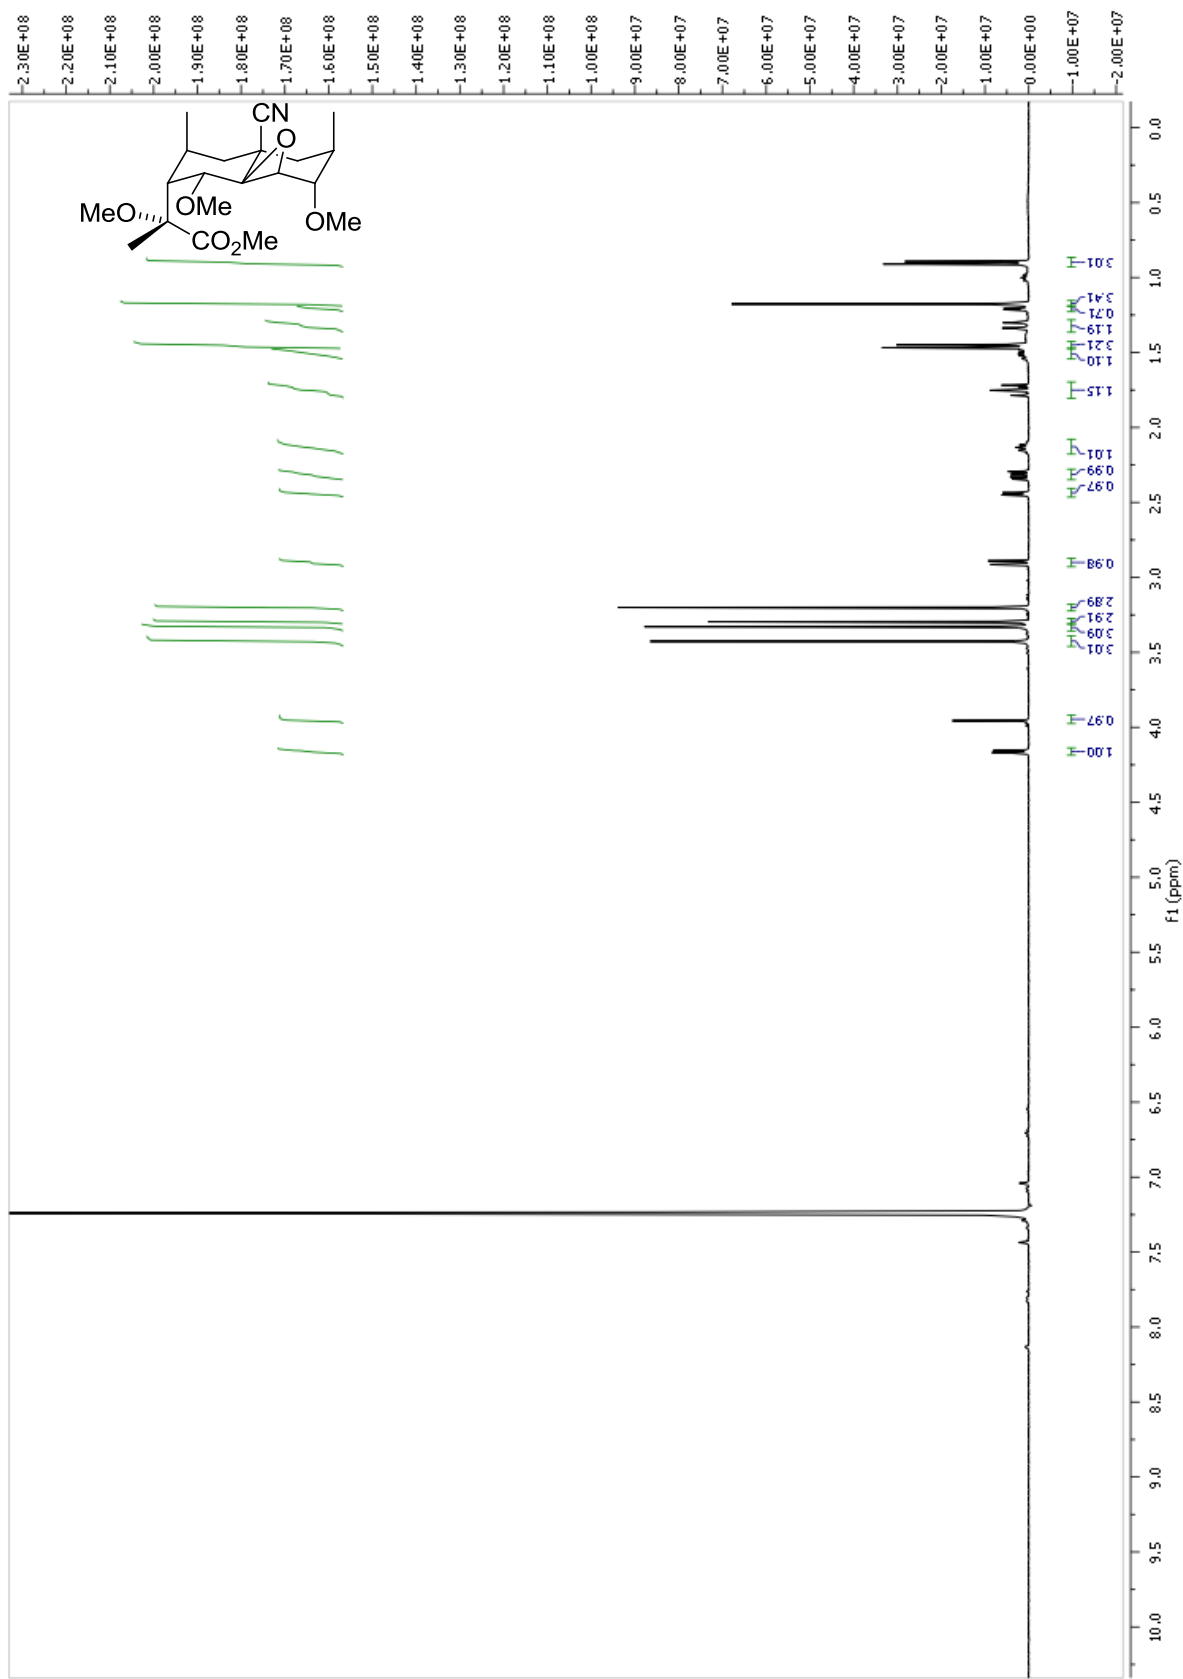

Epoxide 30 – <sup>13</sup>C NMR (100 MHz)

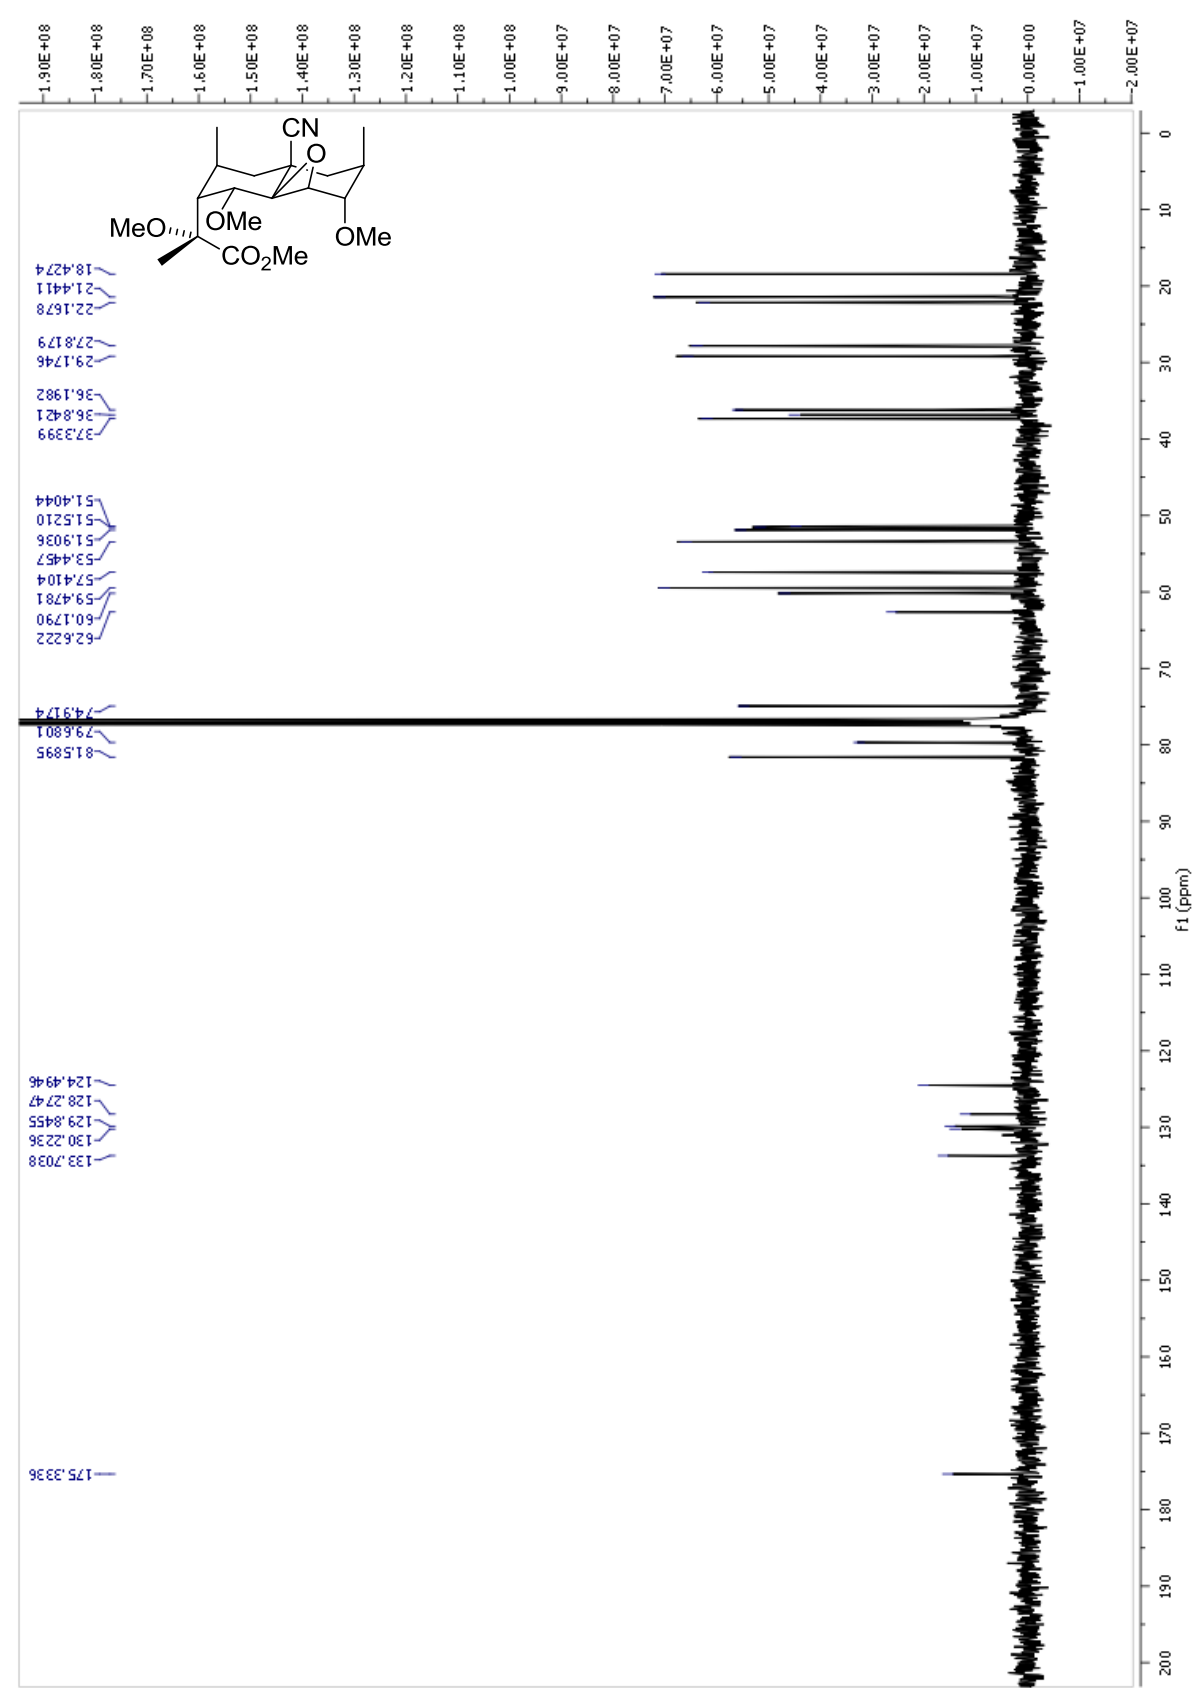



**β-Dihydroagarofuran 31 – <sup>1</sup>H NMR (400 MHz)**

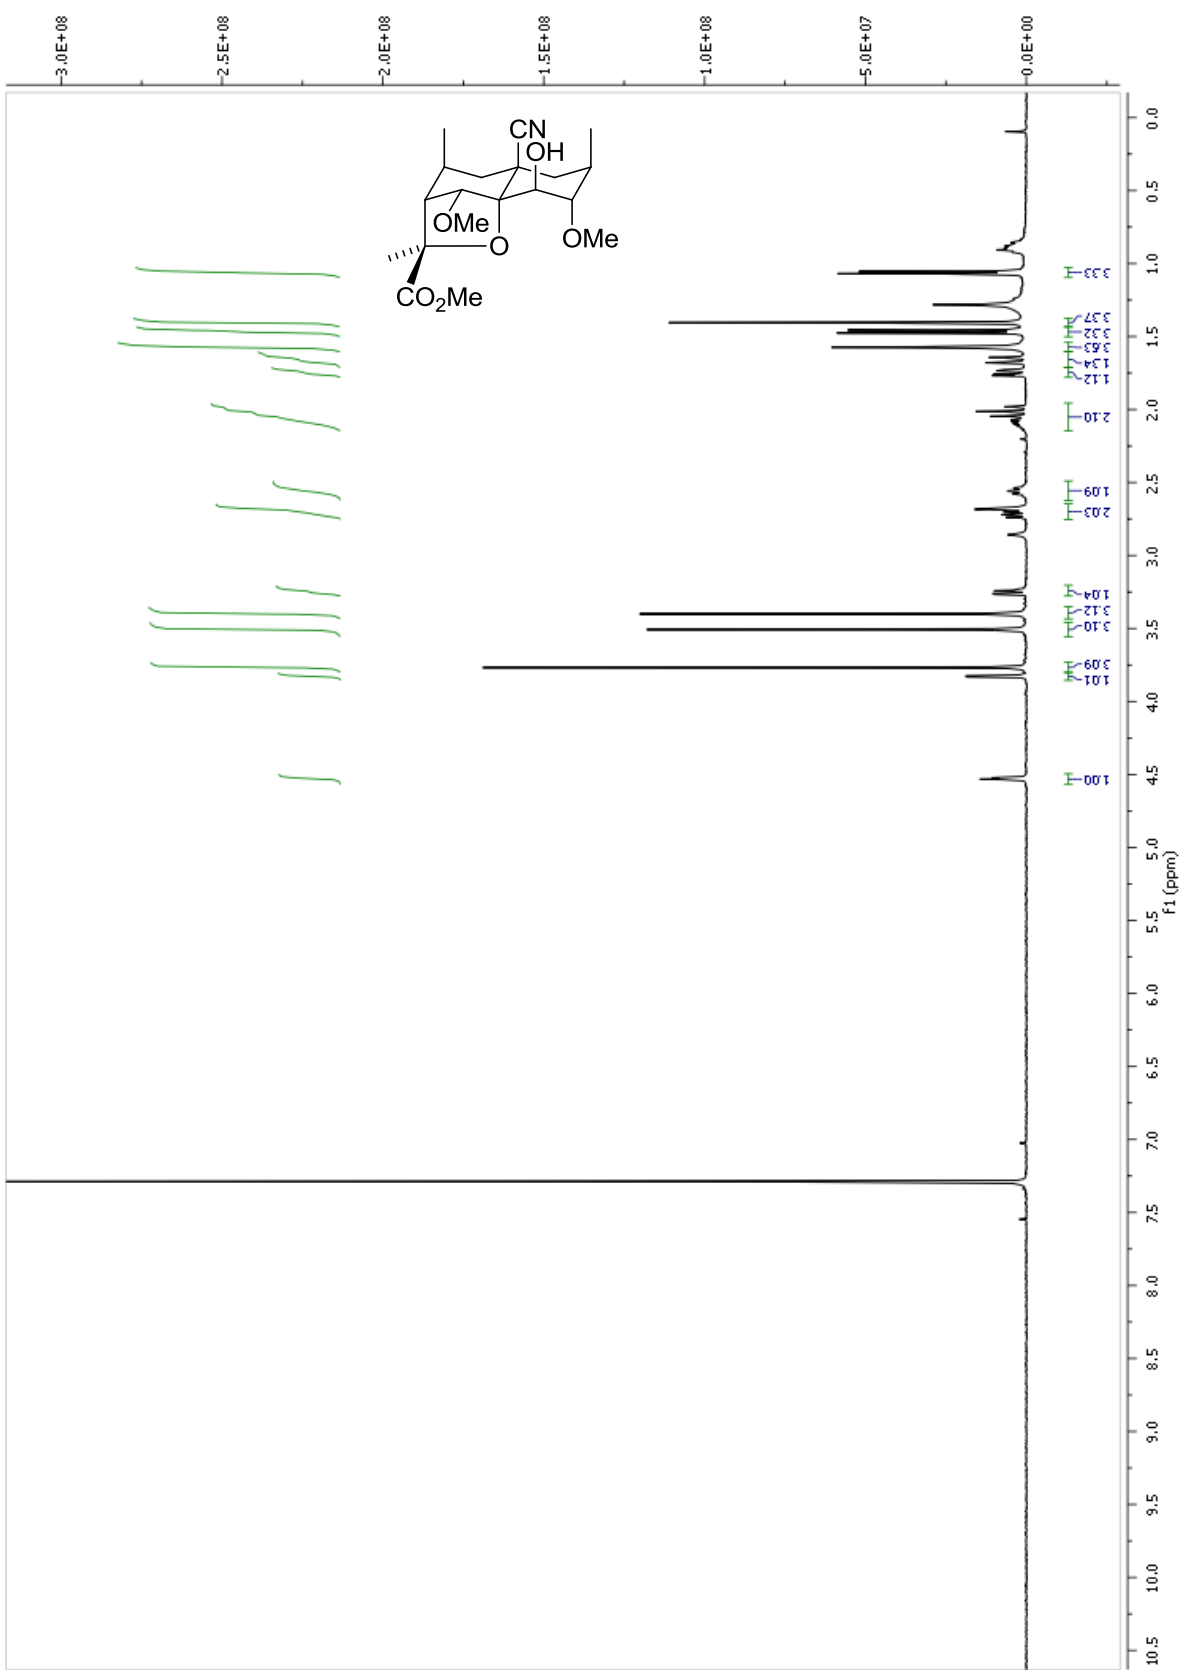

**$\beta$ -Dihydroagarofuran 31 –  $^{13}\text{C}$  NMR (100 MHz)**

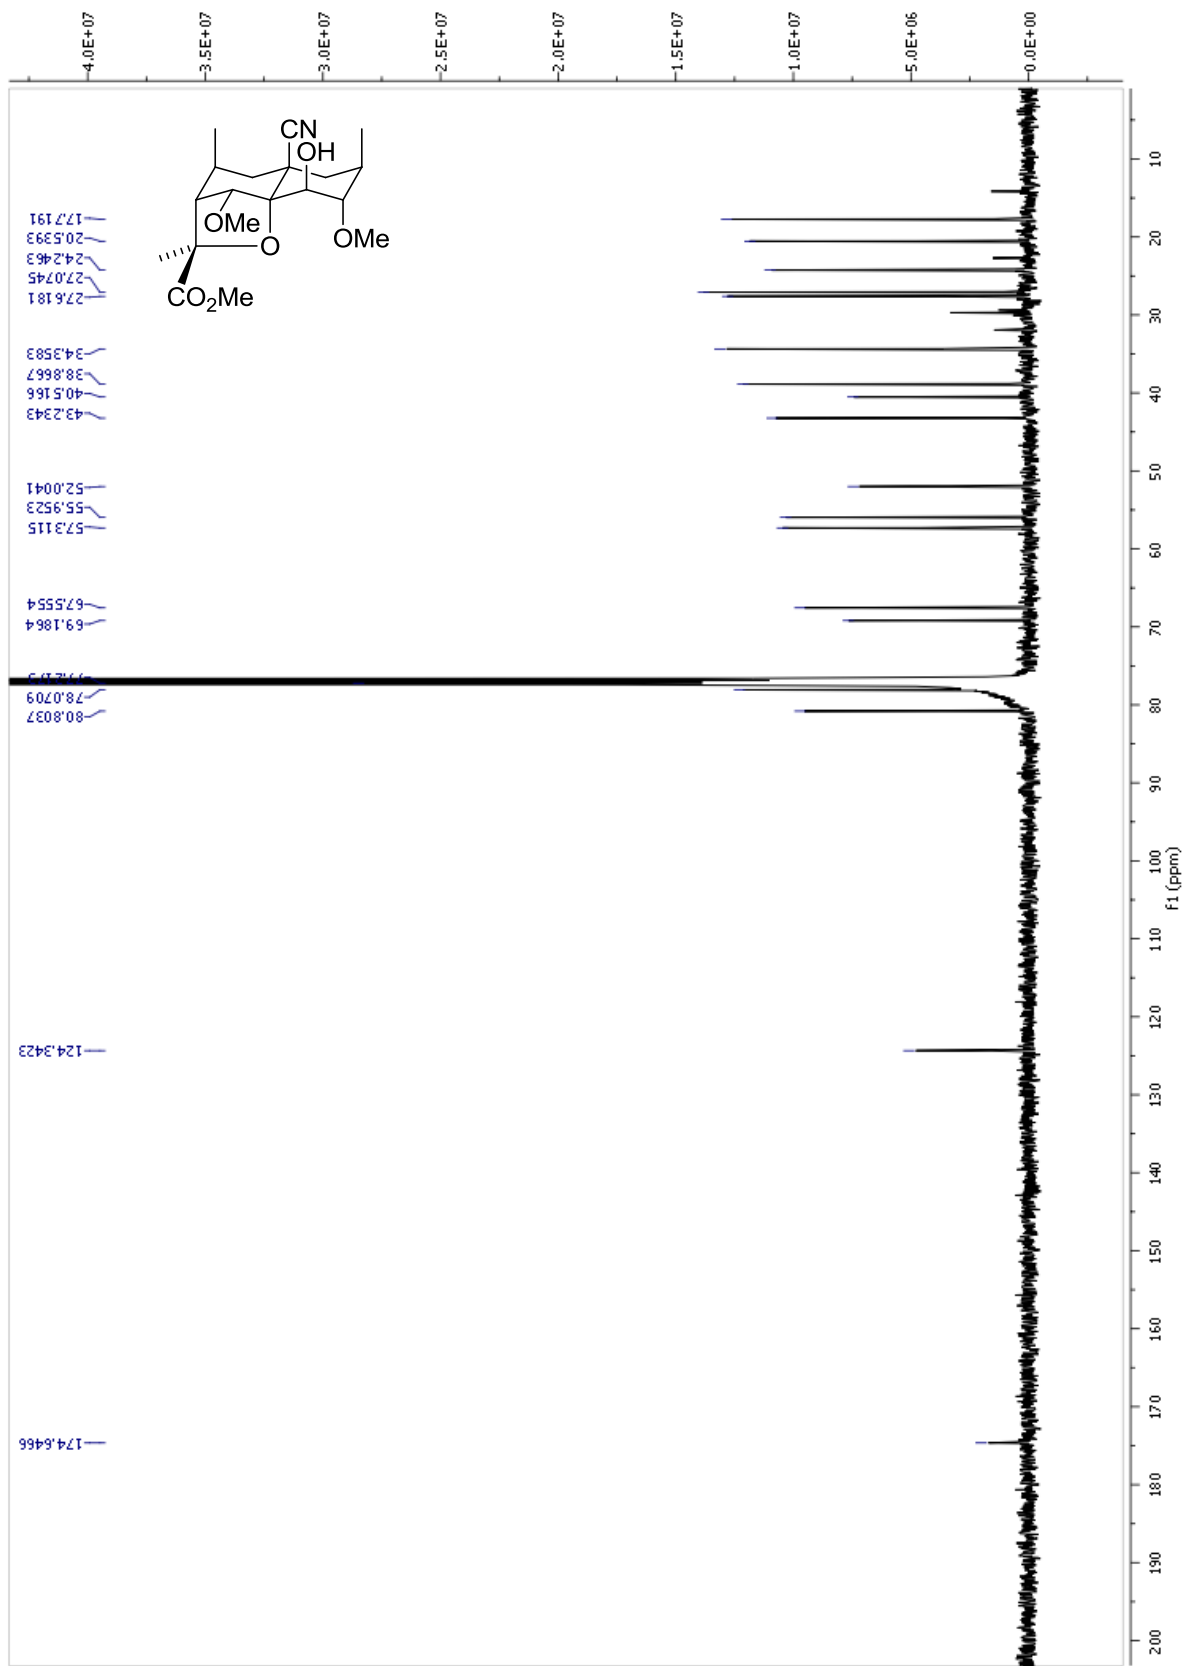

**$\delta$ -Lactone 32 –  $^1\text{H}$  NMR (400 MHz)**

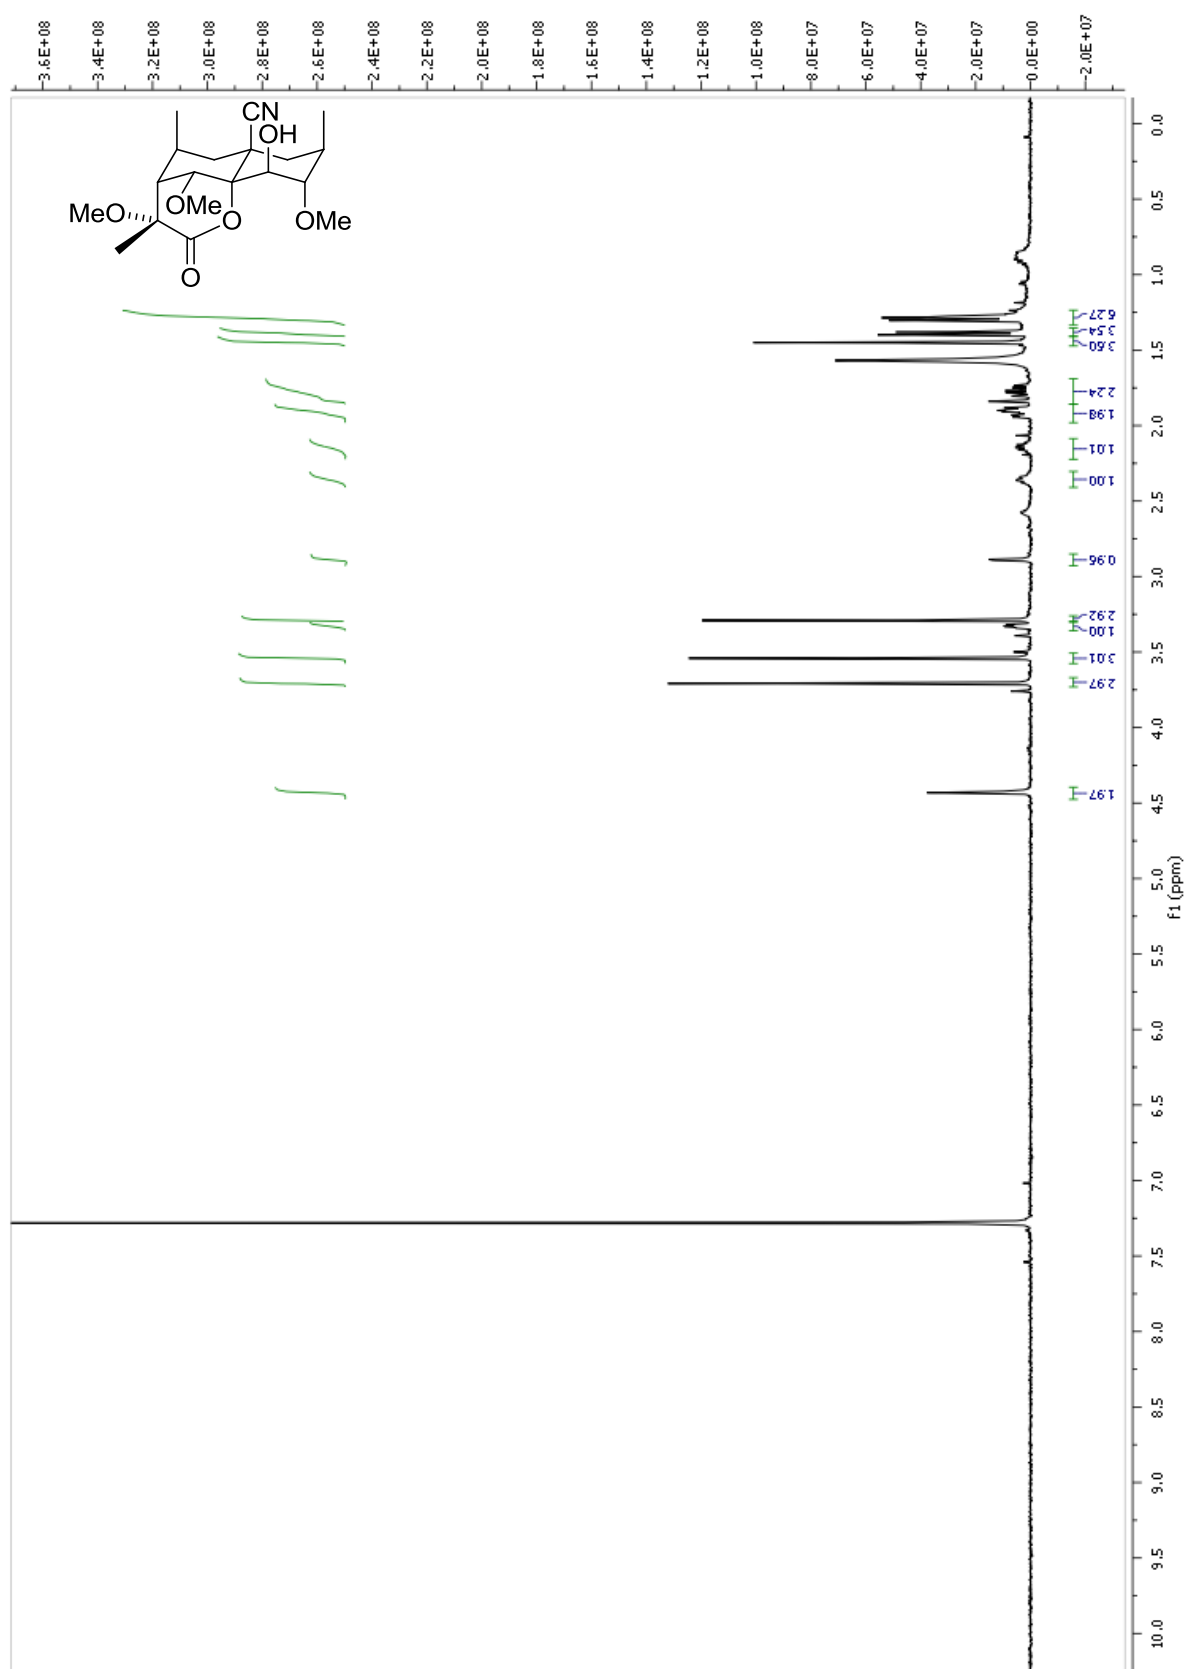

**$\delta$ -Lactone 32 –  $^{13}\text{C}$  NMR (100 MHz)**

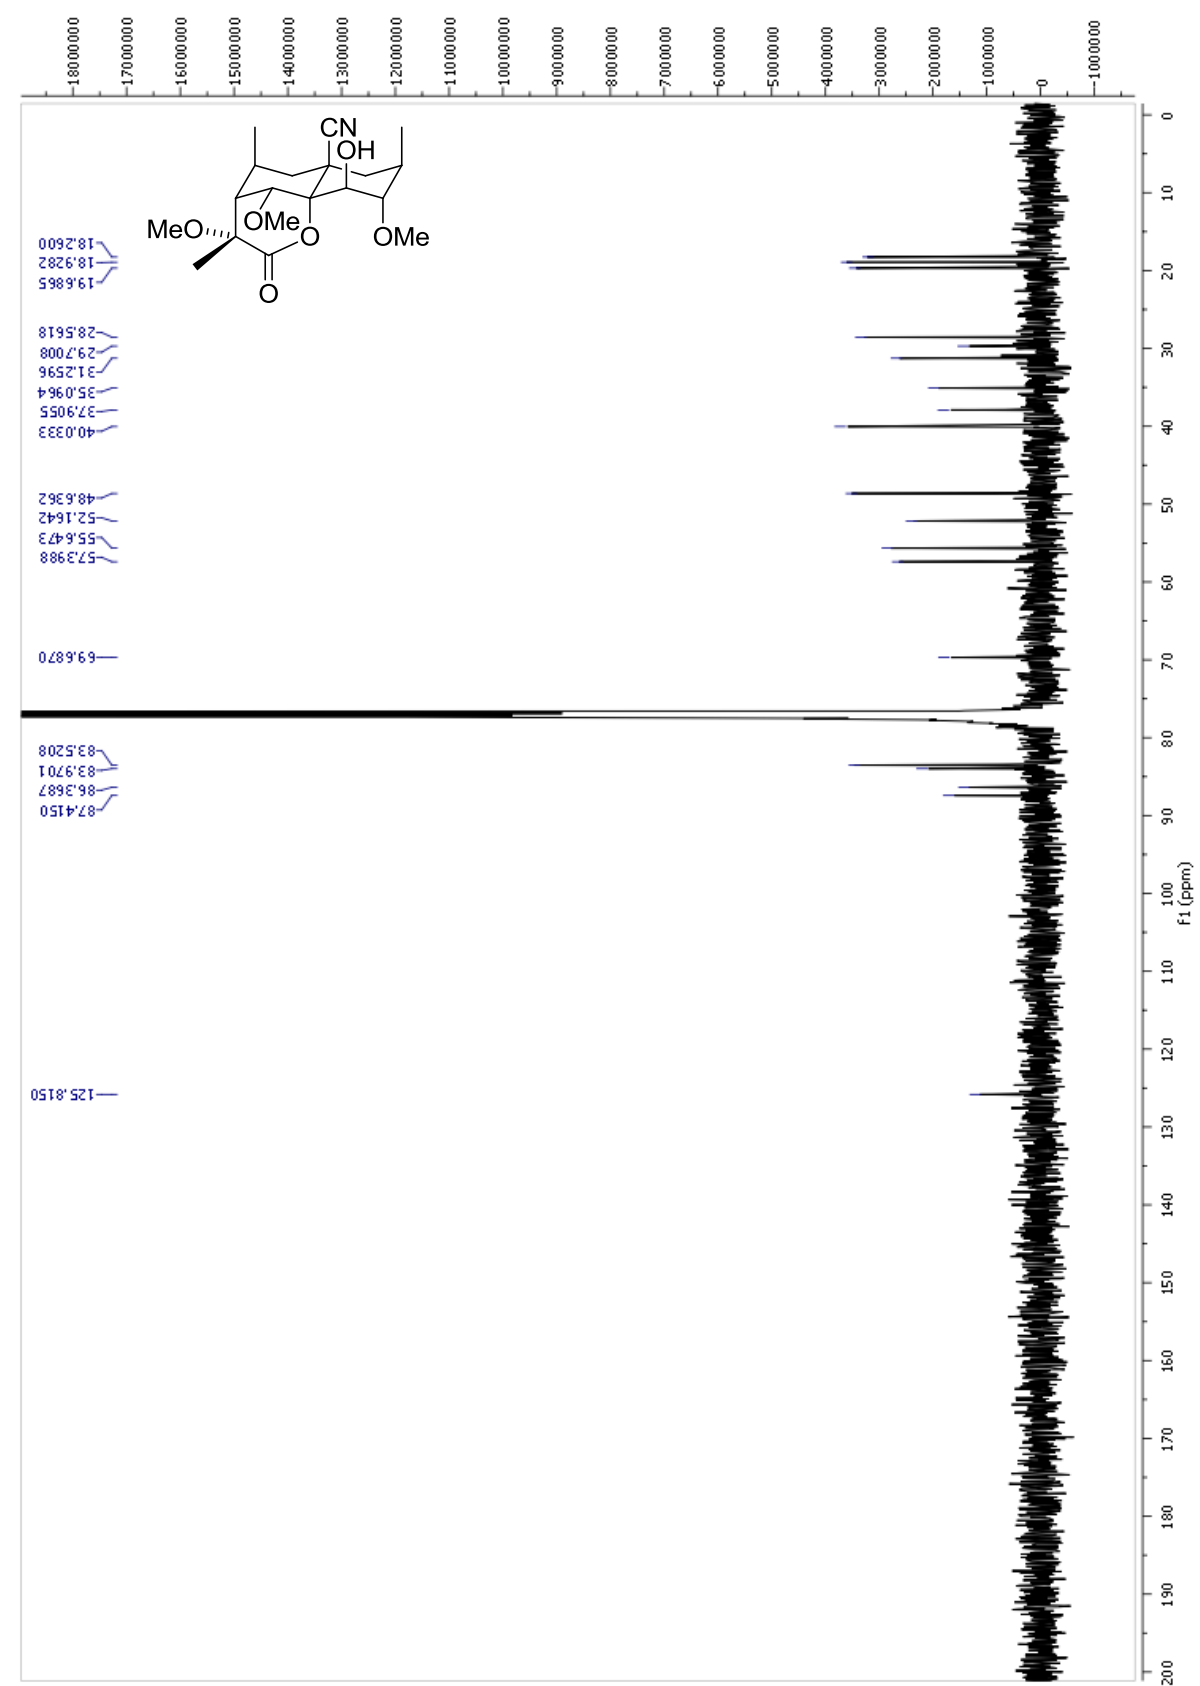

Alcohol 33 – <sup>1</sup>H NMR (400 MHz)

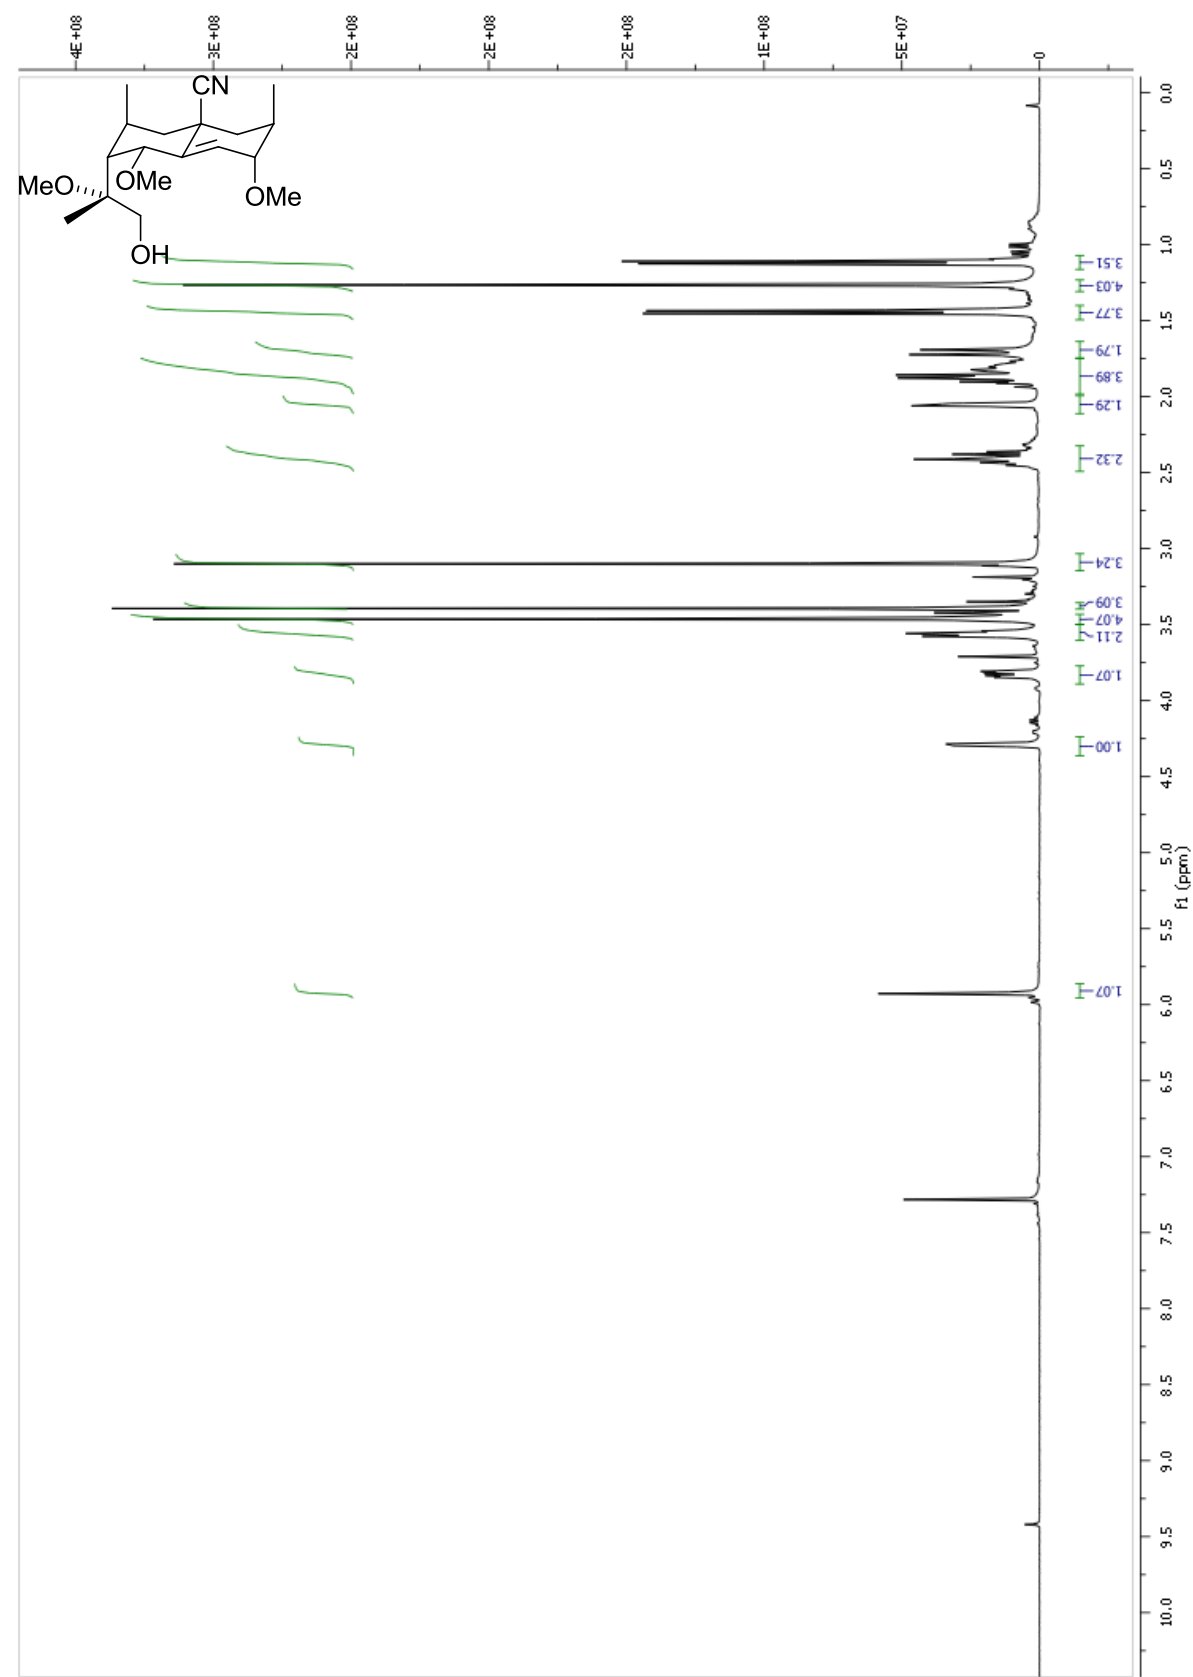

Alcohol 33 – <sup>13</sup>C NMR (100 MHz)

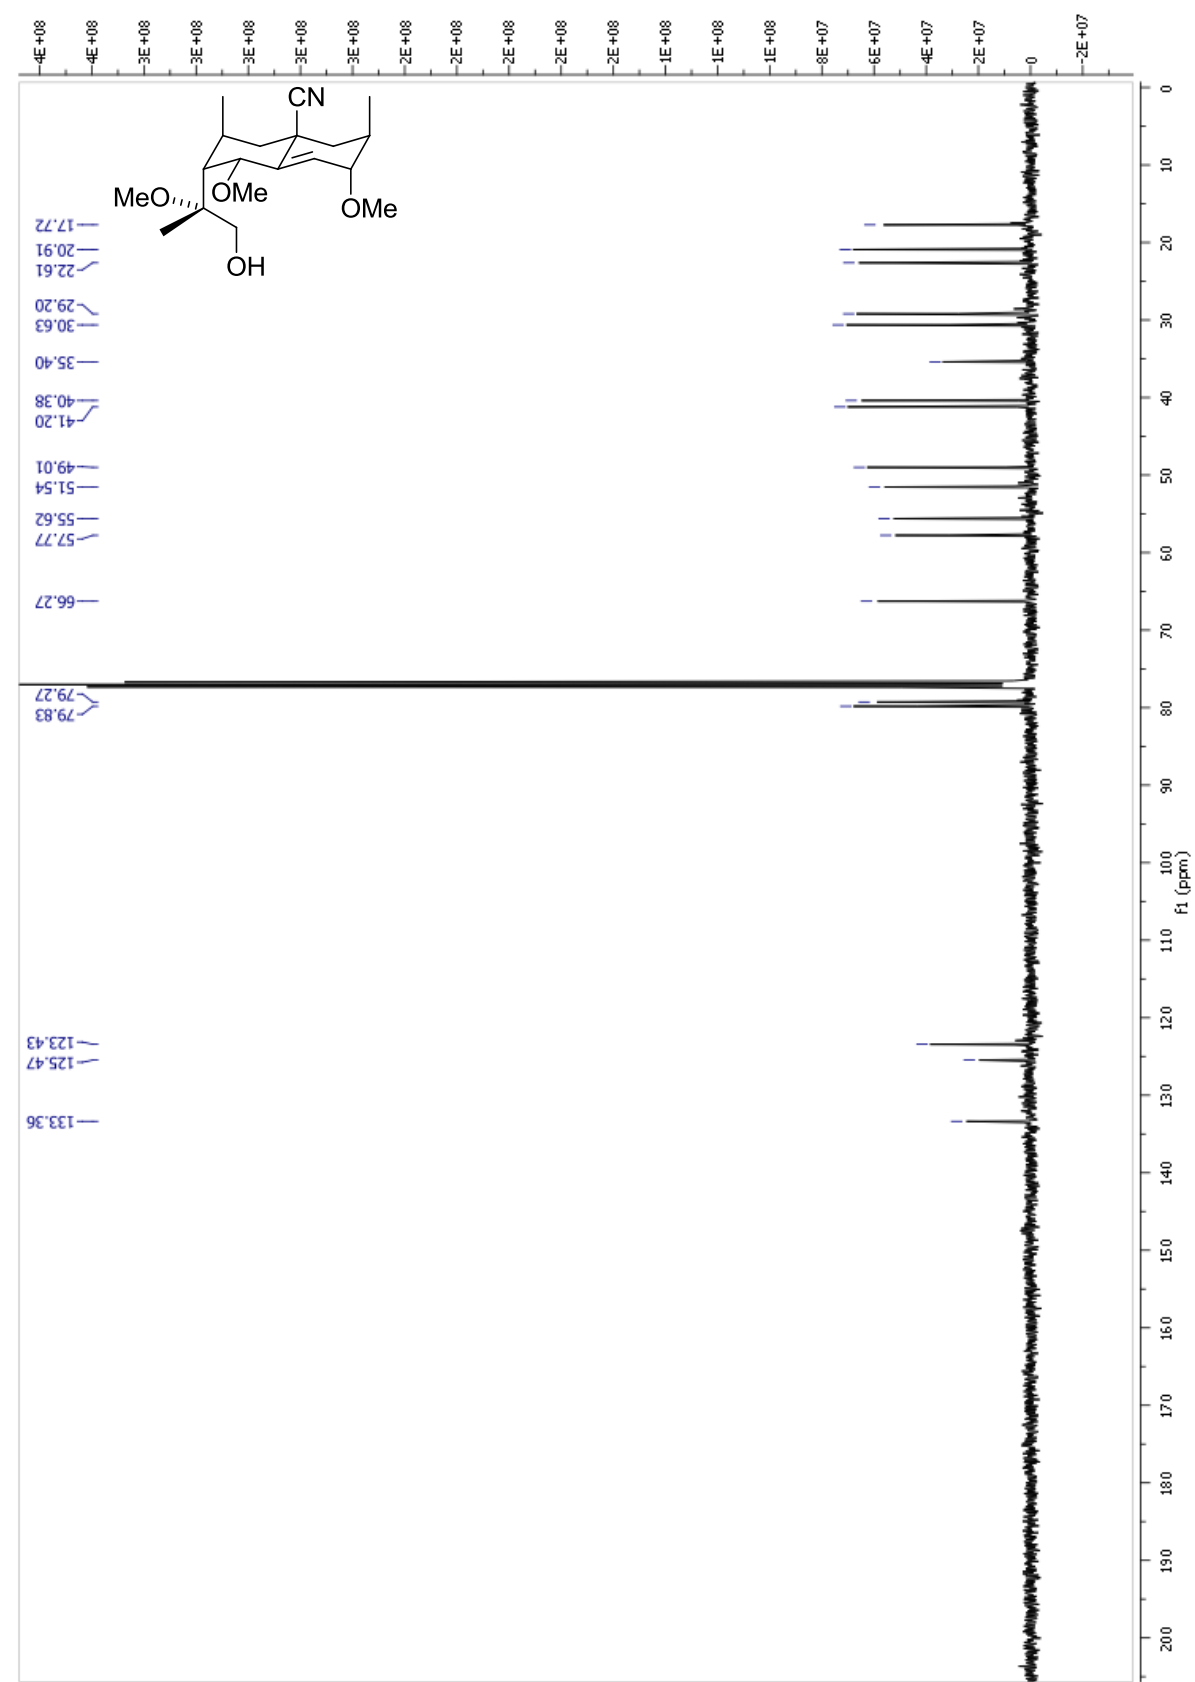

Acetate 34 – <sup>1</sup>H NMR (400 MHz)

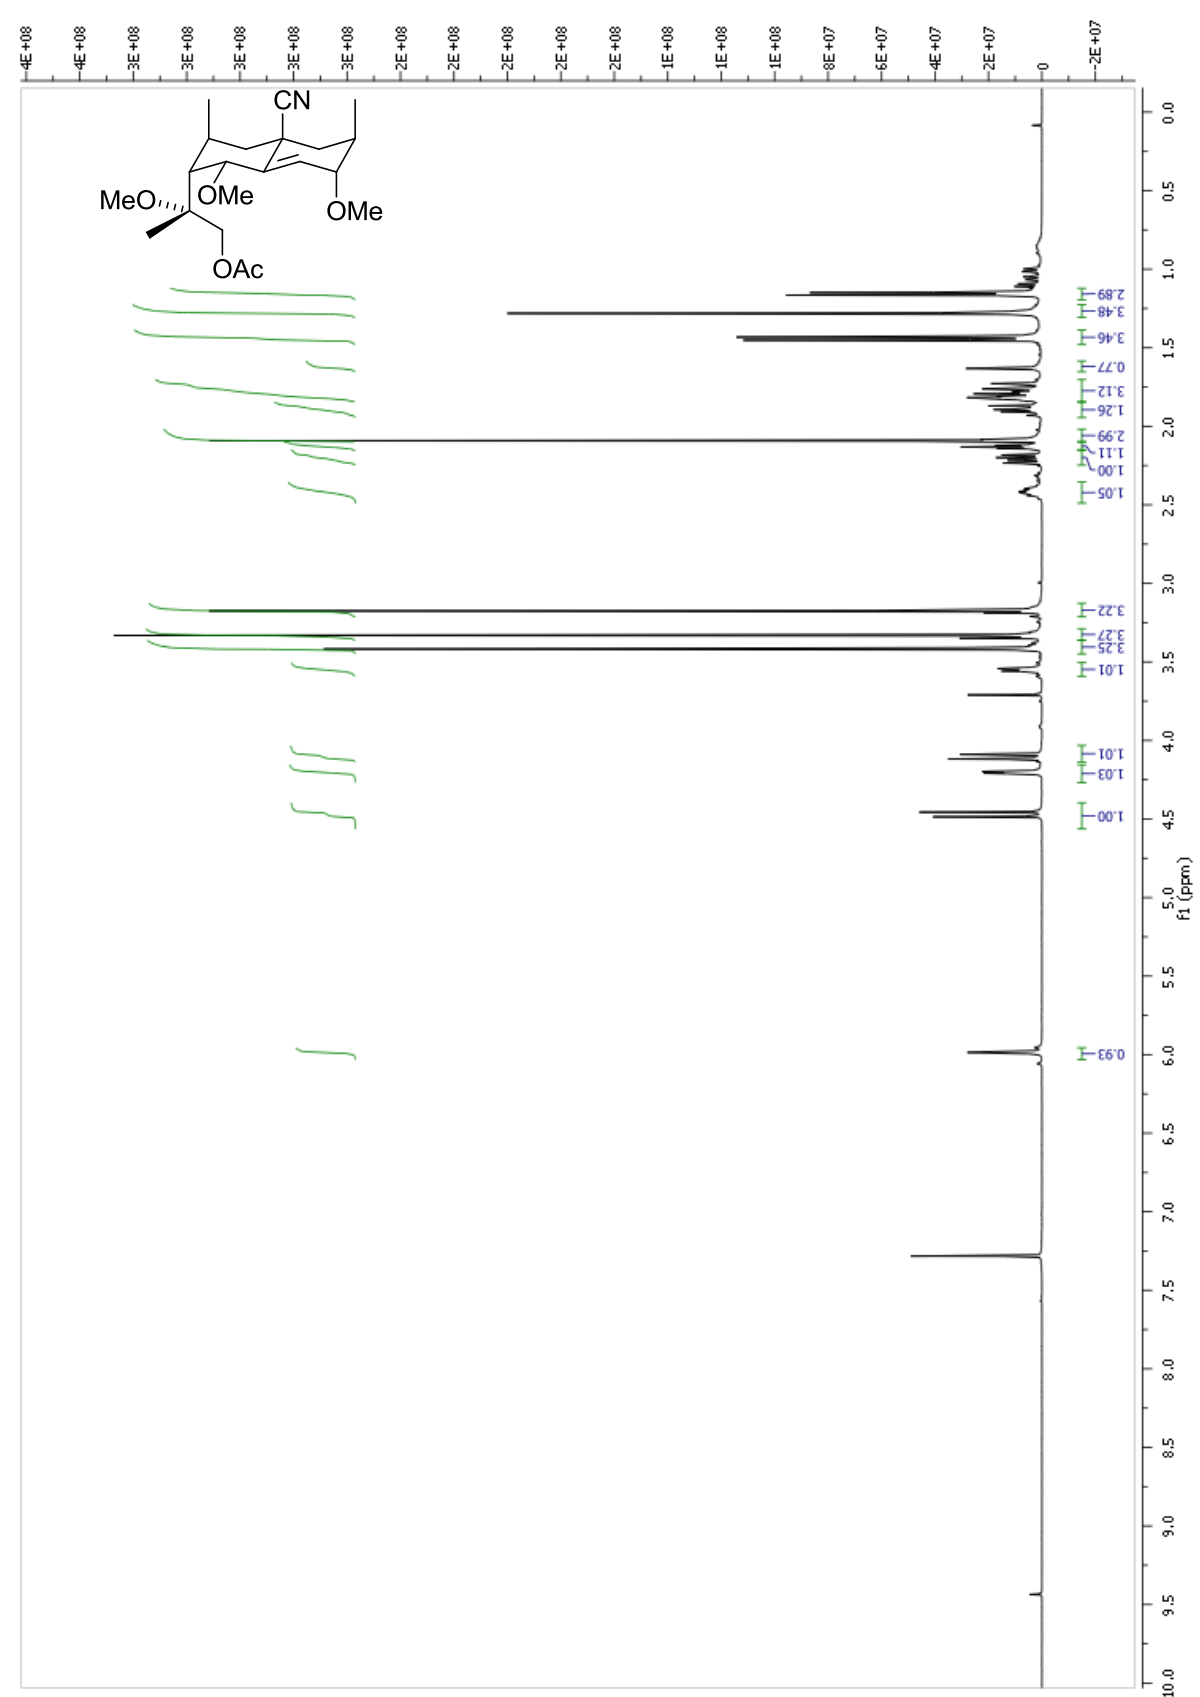

Acetate 34 – <sup>13</sup>C NMR (100 MHz)

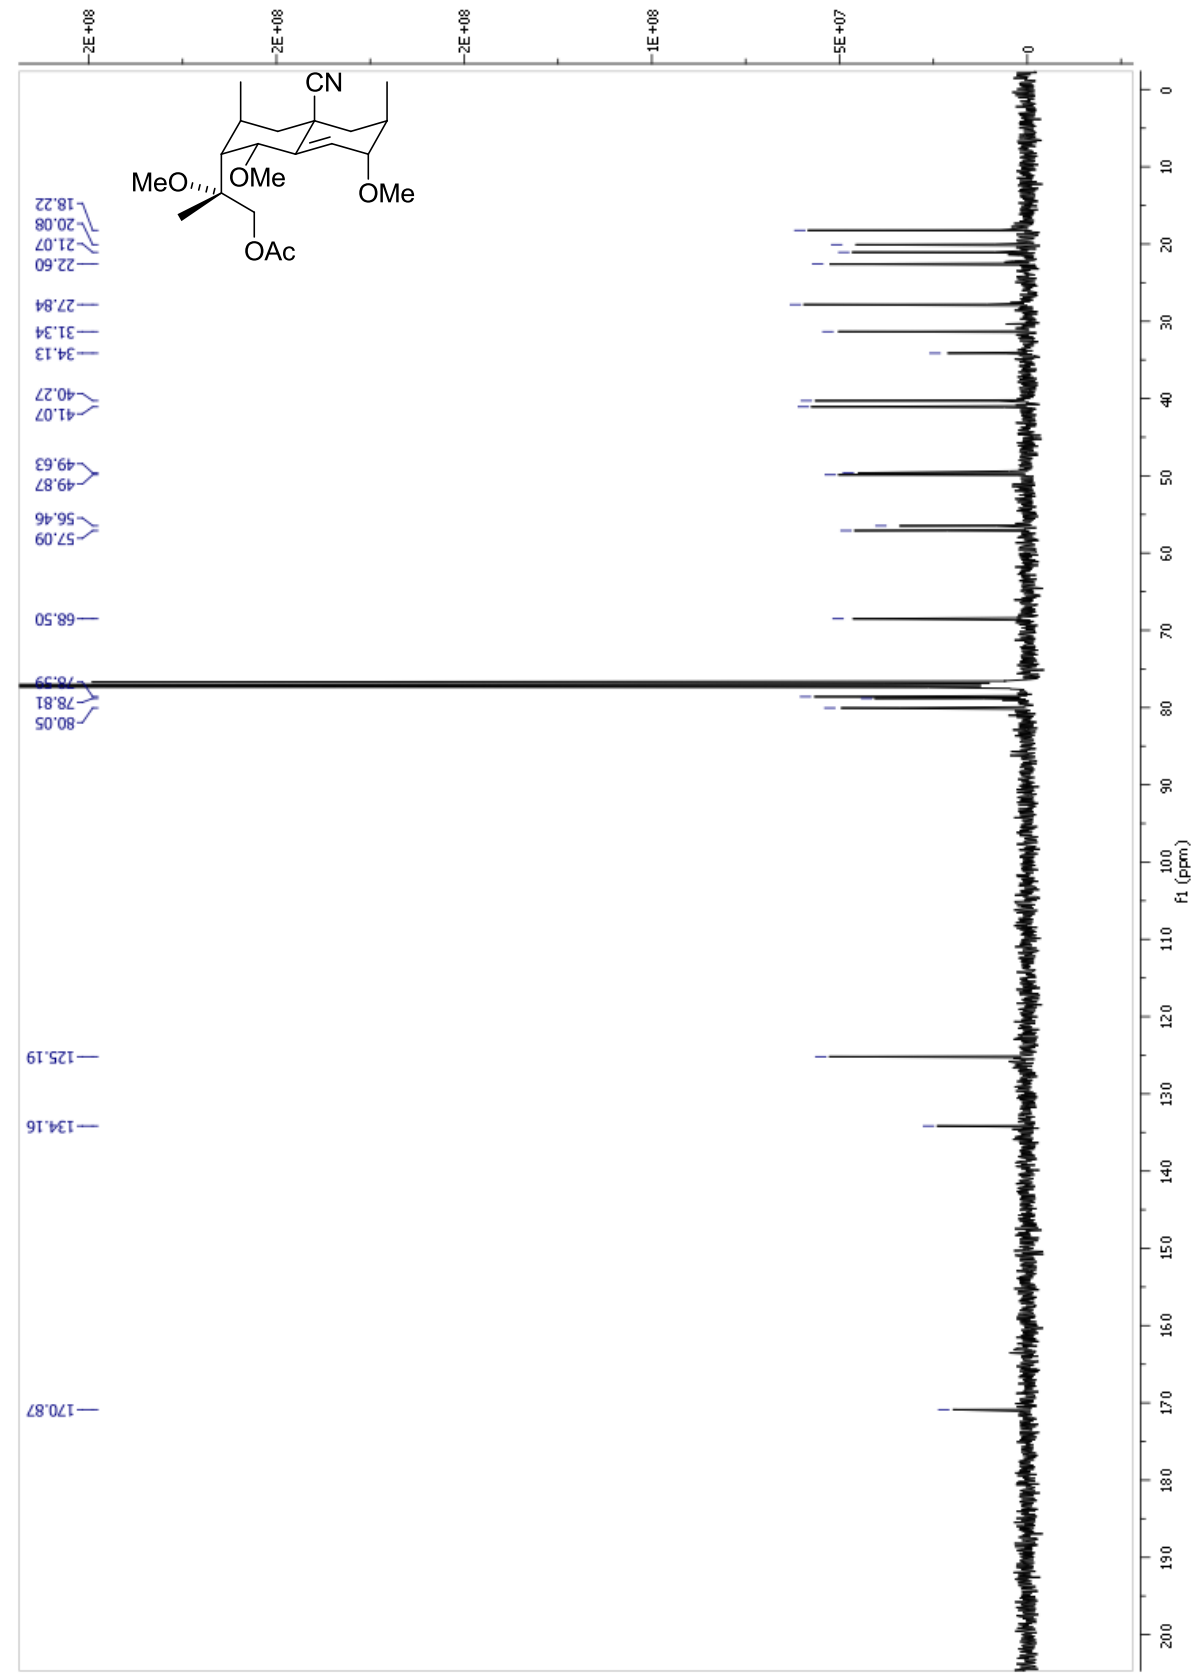



Epoxide 35 – <sup>1</sup>H NMR (400 MHz)

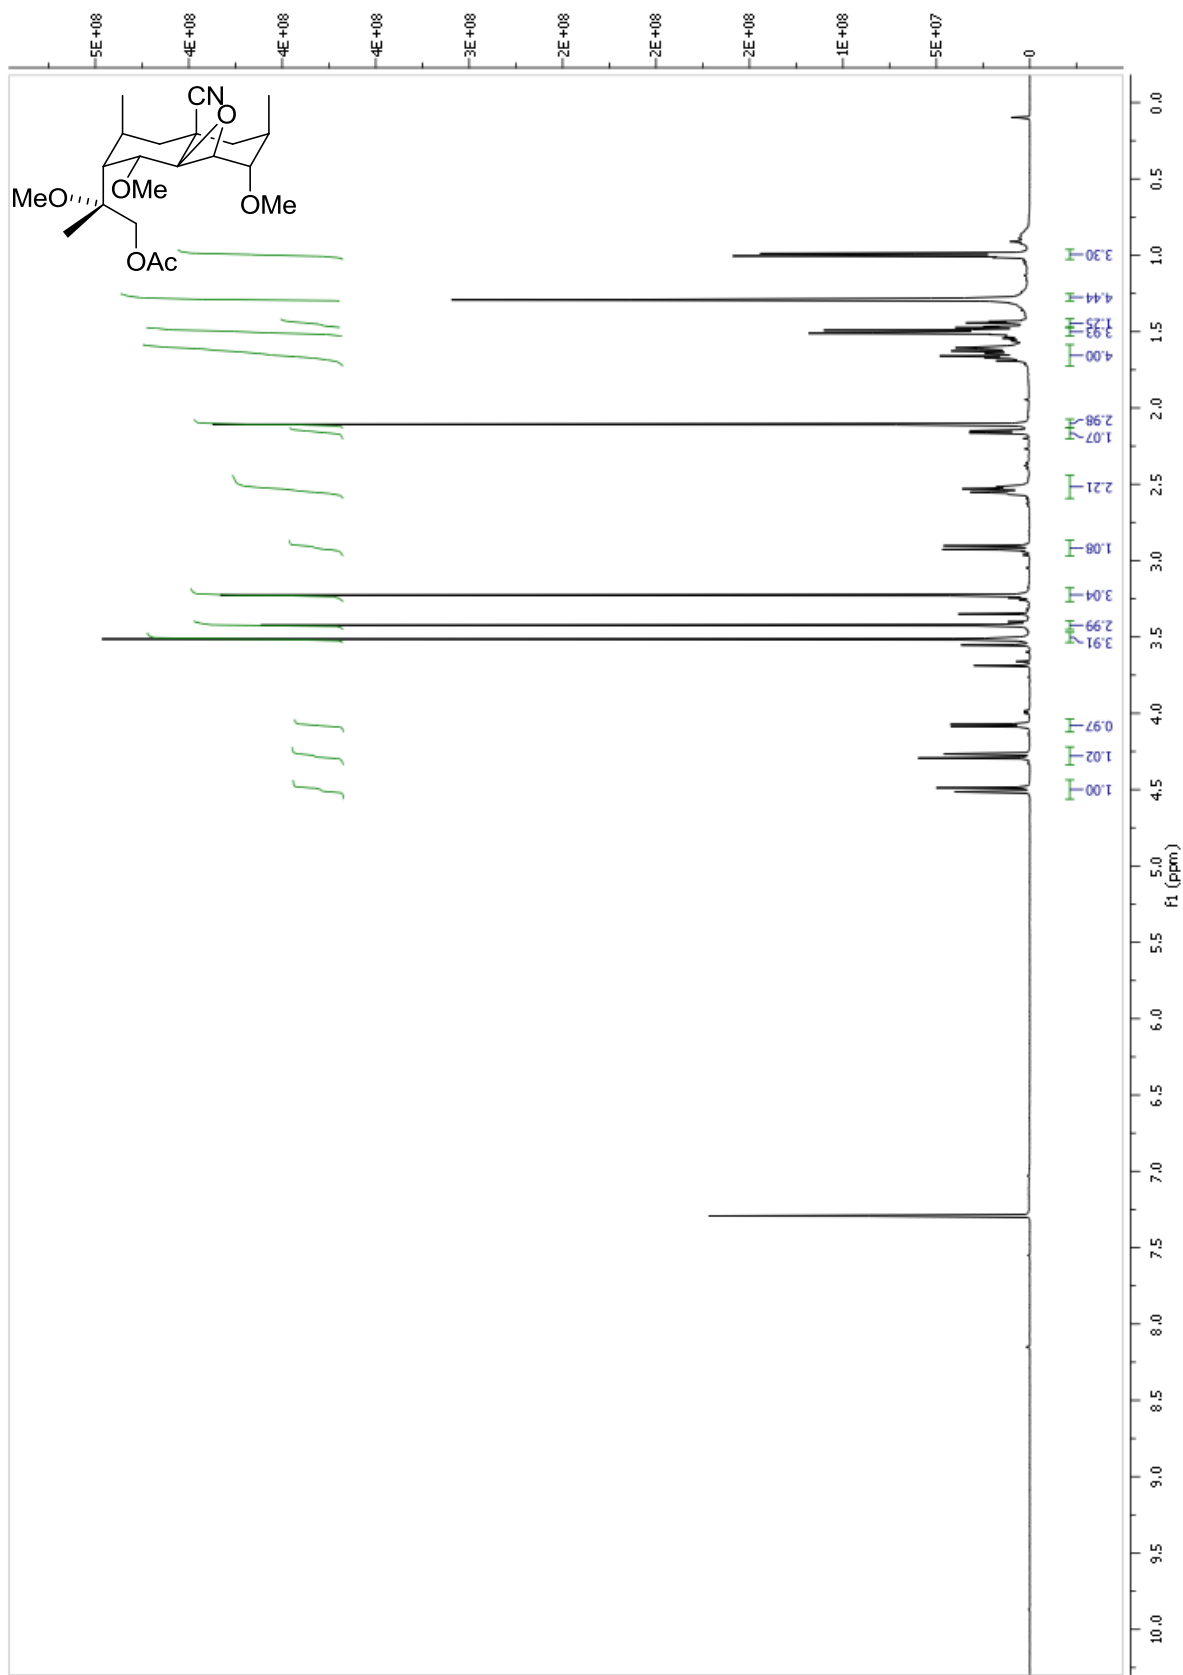

Epoxide 35 – <sup>13</sup>C NMR (100 MHz)

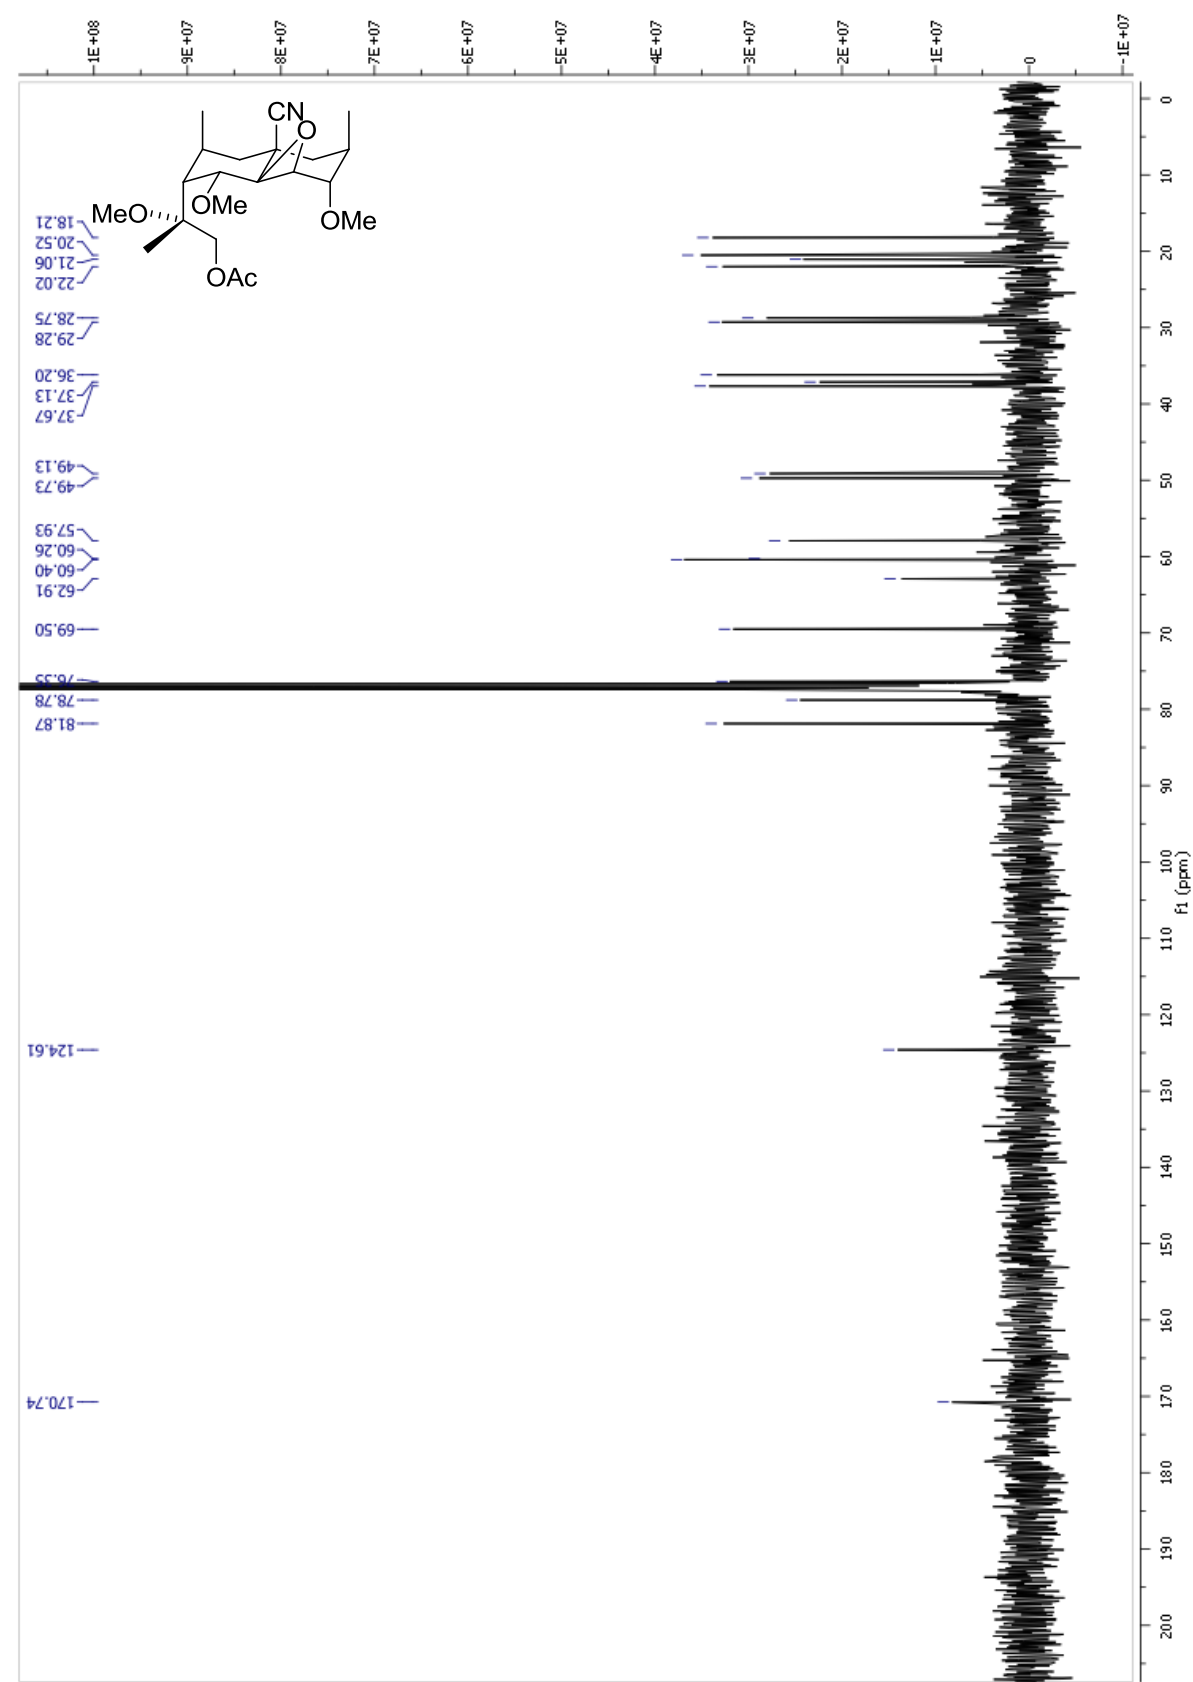

**$\beta$ -Dihydroagarofuran 36 –  $^1\text{H}$  NMR (400 MHz)**

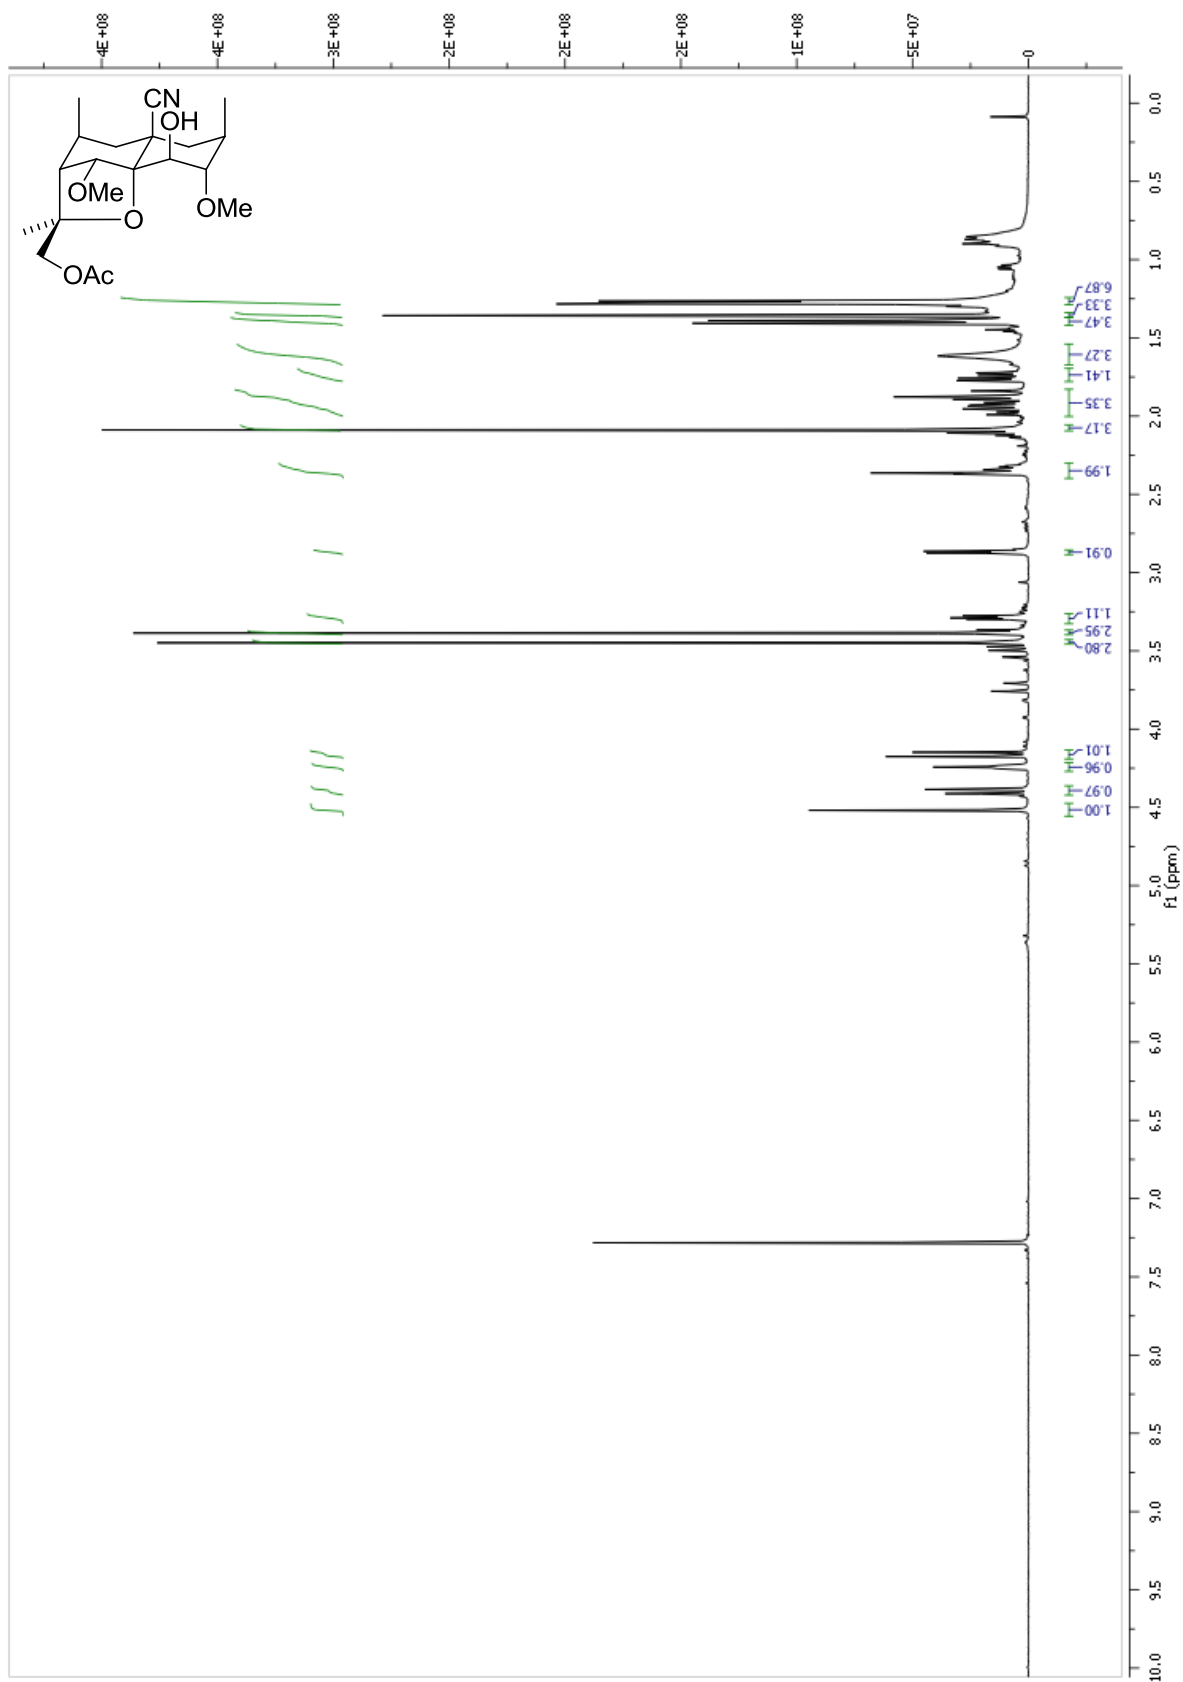

**$\beta$ -Dihydroagarofuran 36 –  $^{13}\text{C}$  NMR (100 MHz)**

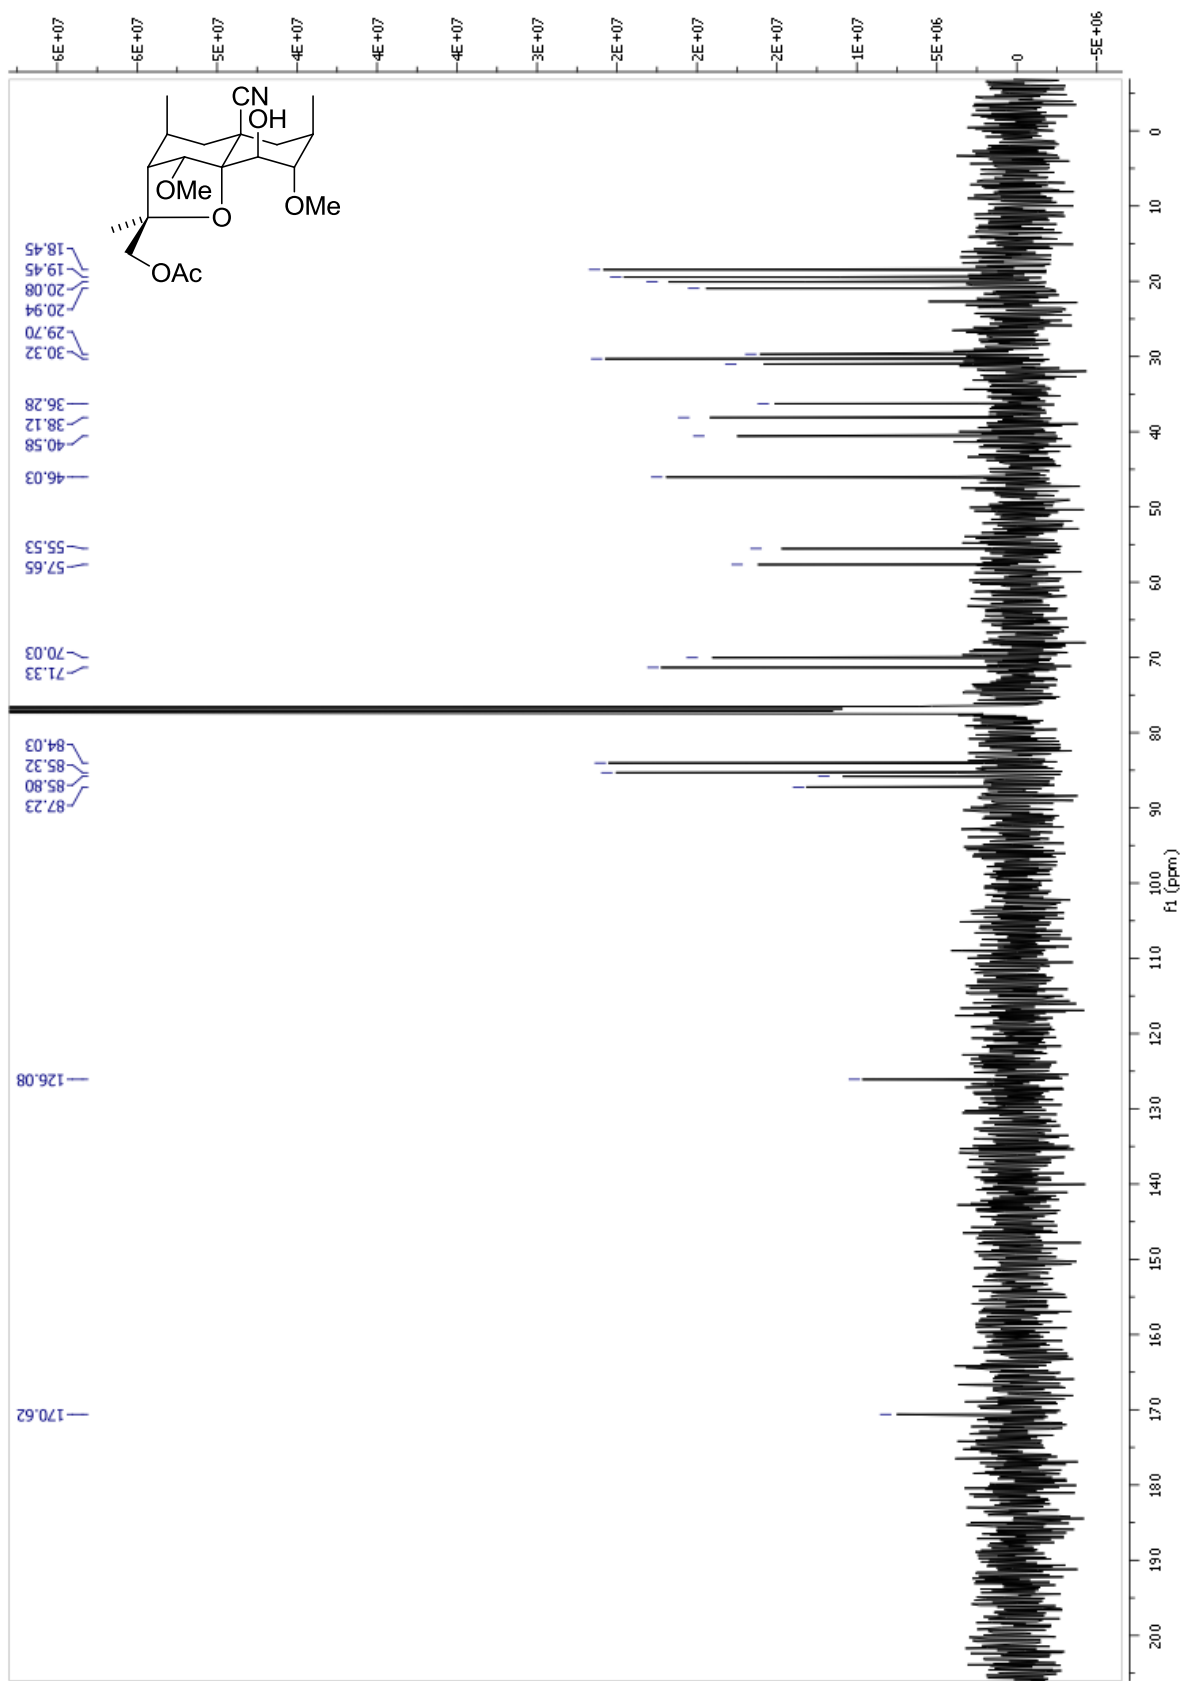

# Ketone 37 – $^1\text{H}$ NMR (400 MHz)

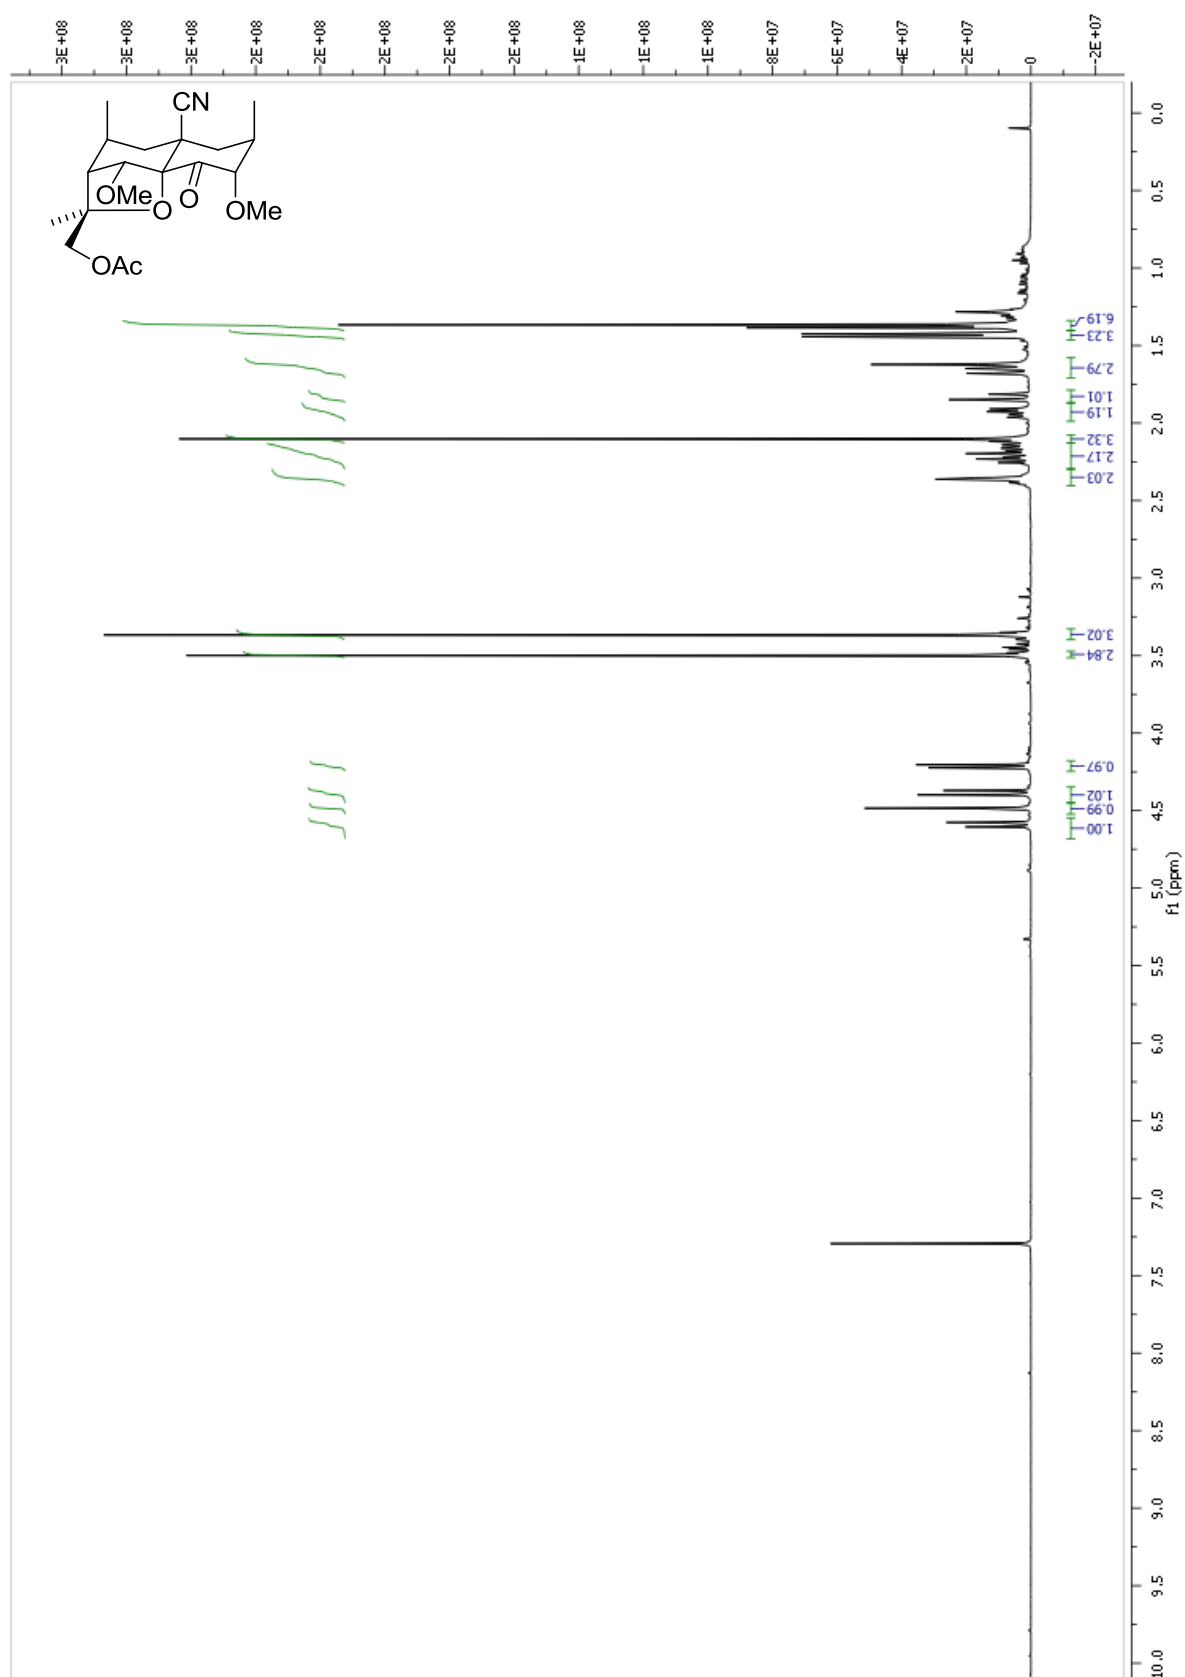

Ketone 37 – <sup>13</sup>C NMR (100 MHz)

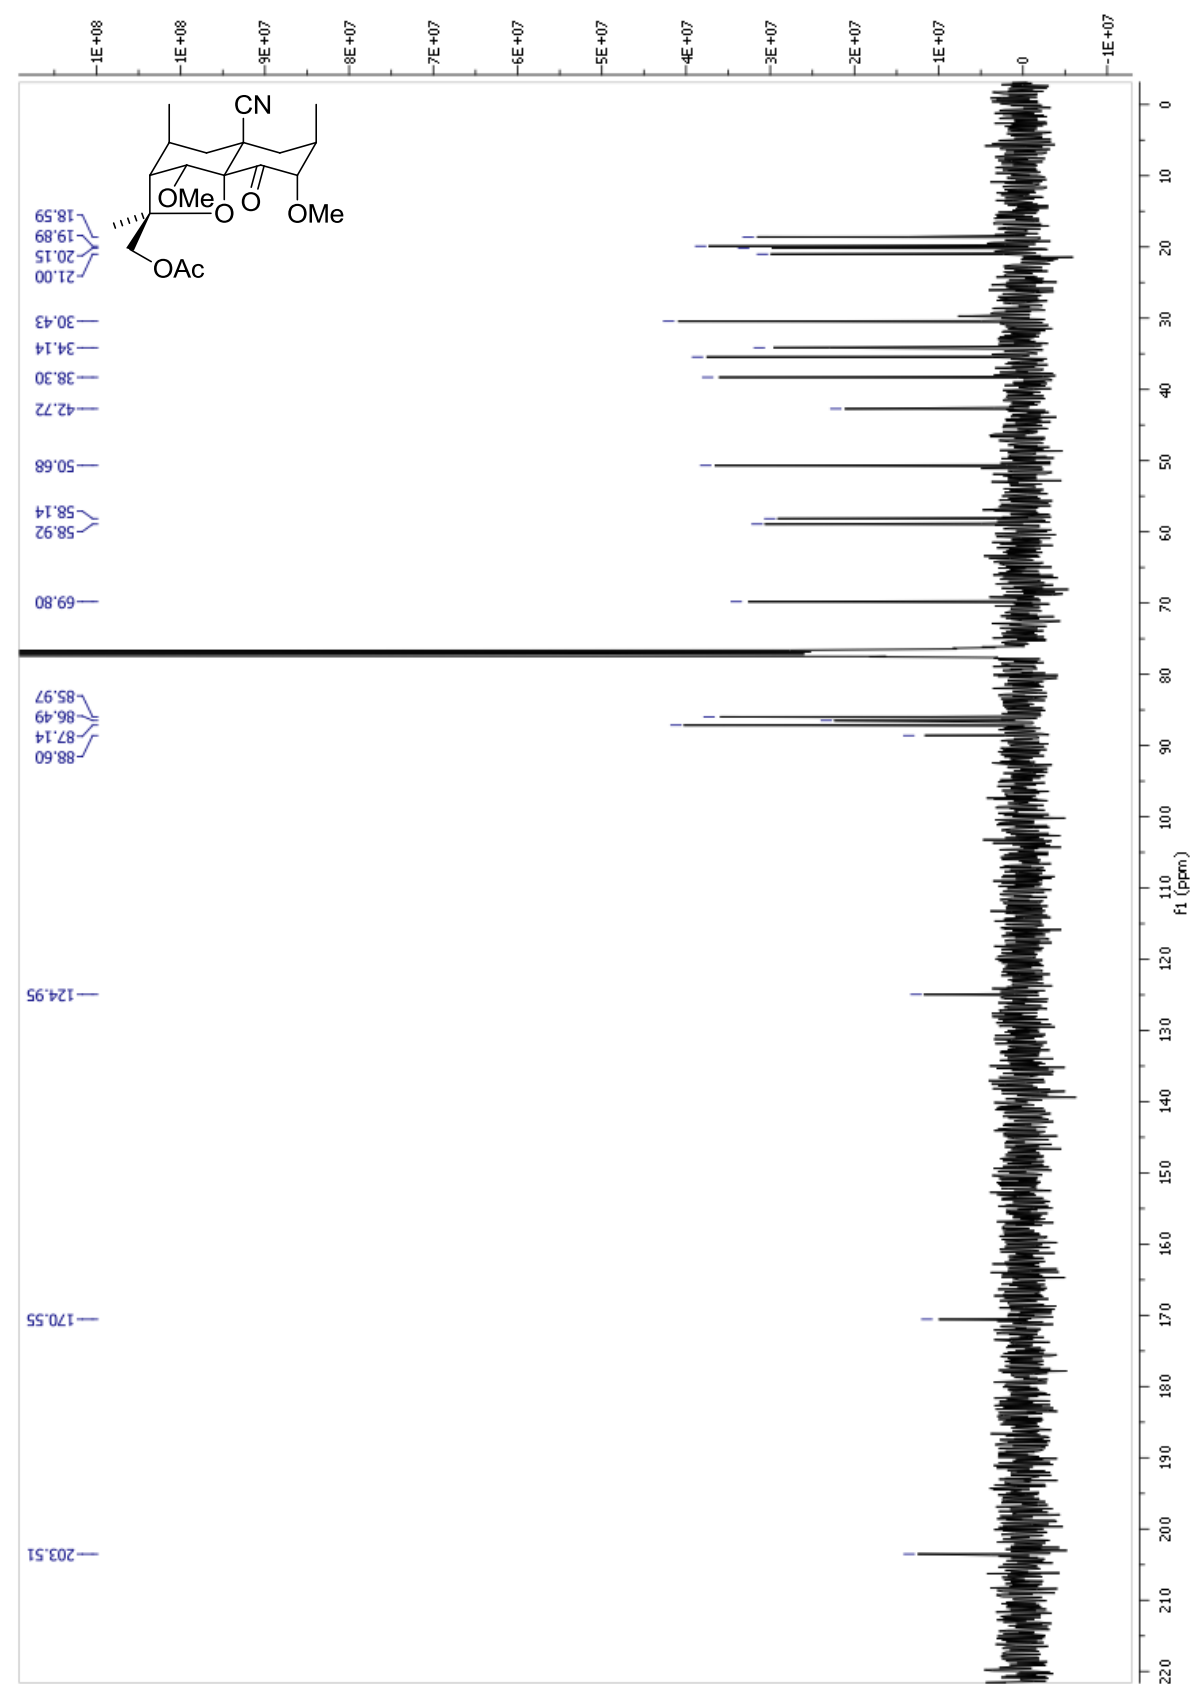

Diol 4 – <sup>1</sup>H NMR (400 MHz)

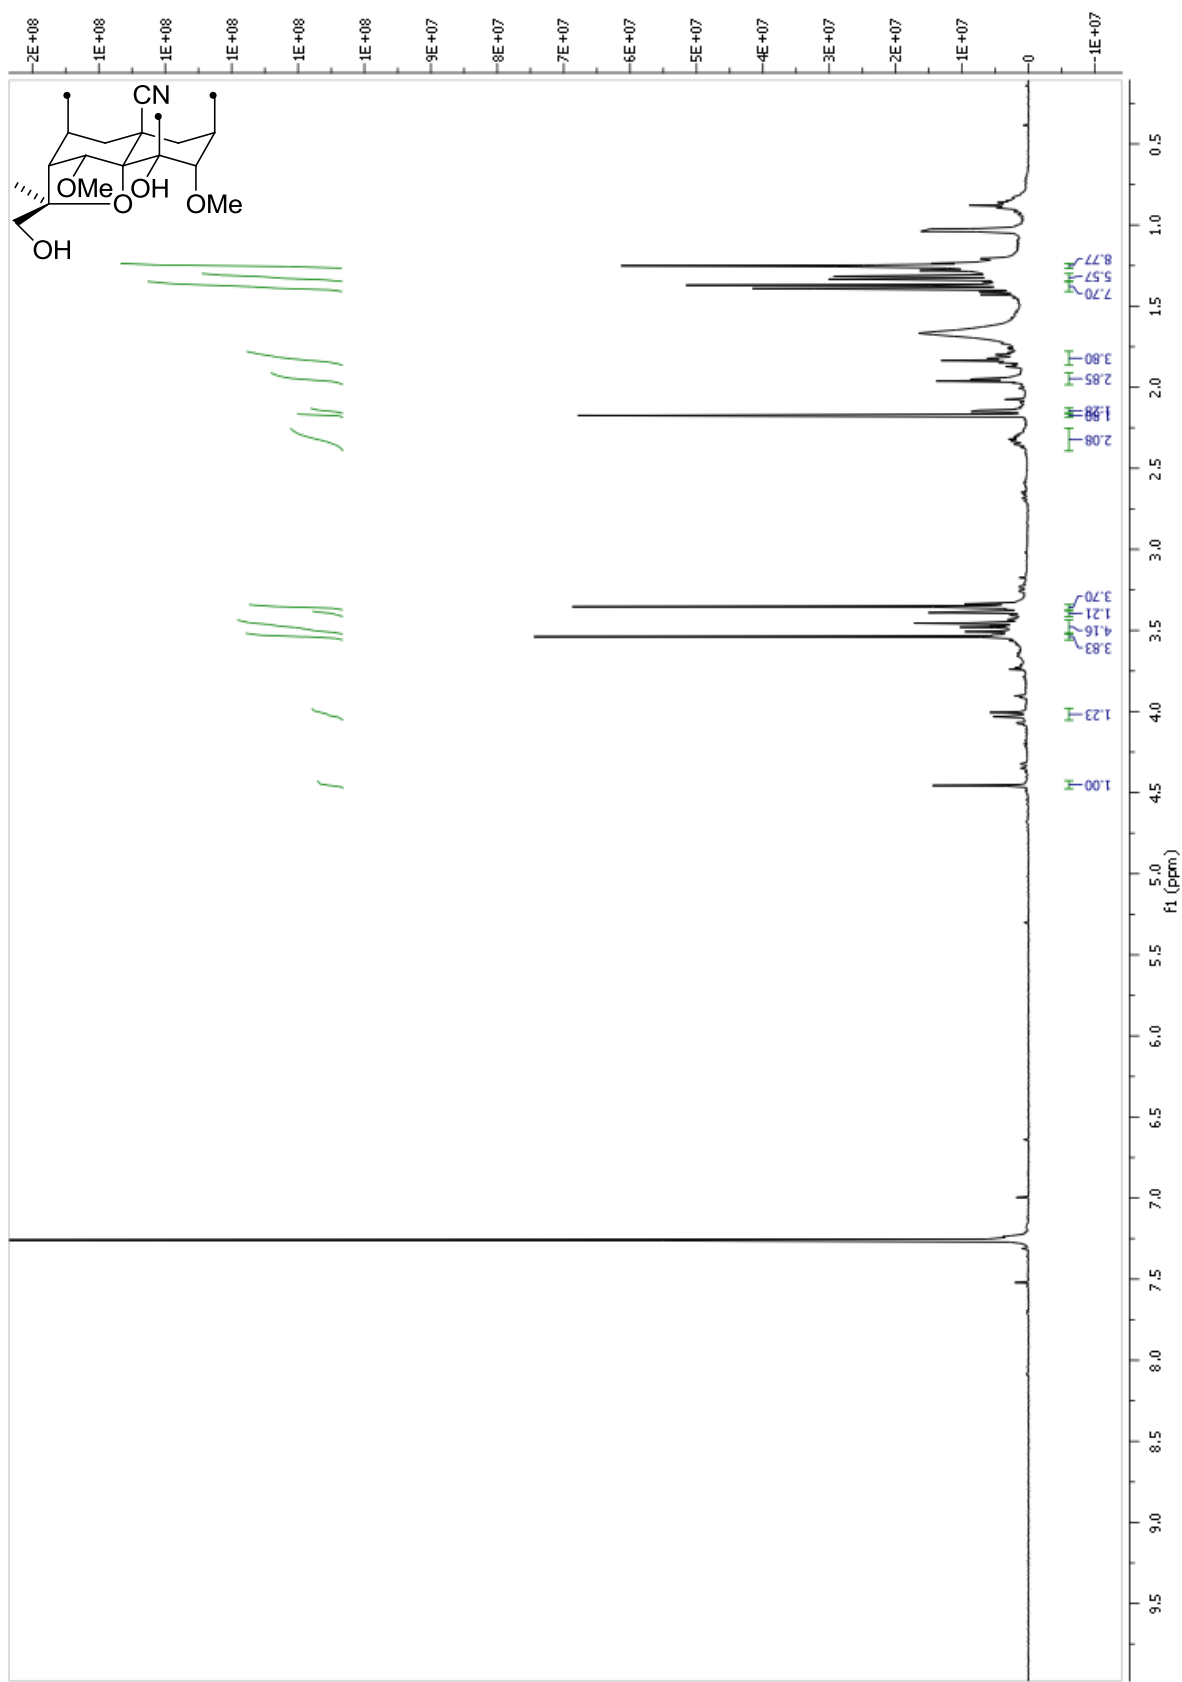

Diol 4 – <sup>13</sup>C NMR (100 MHz)

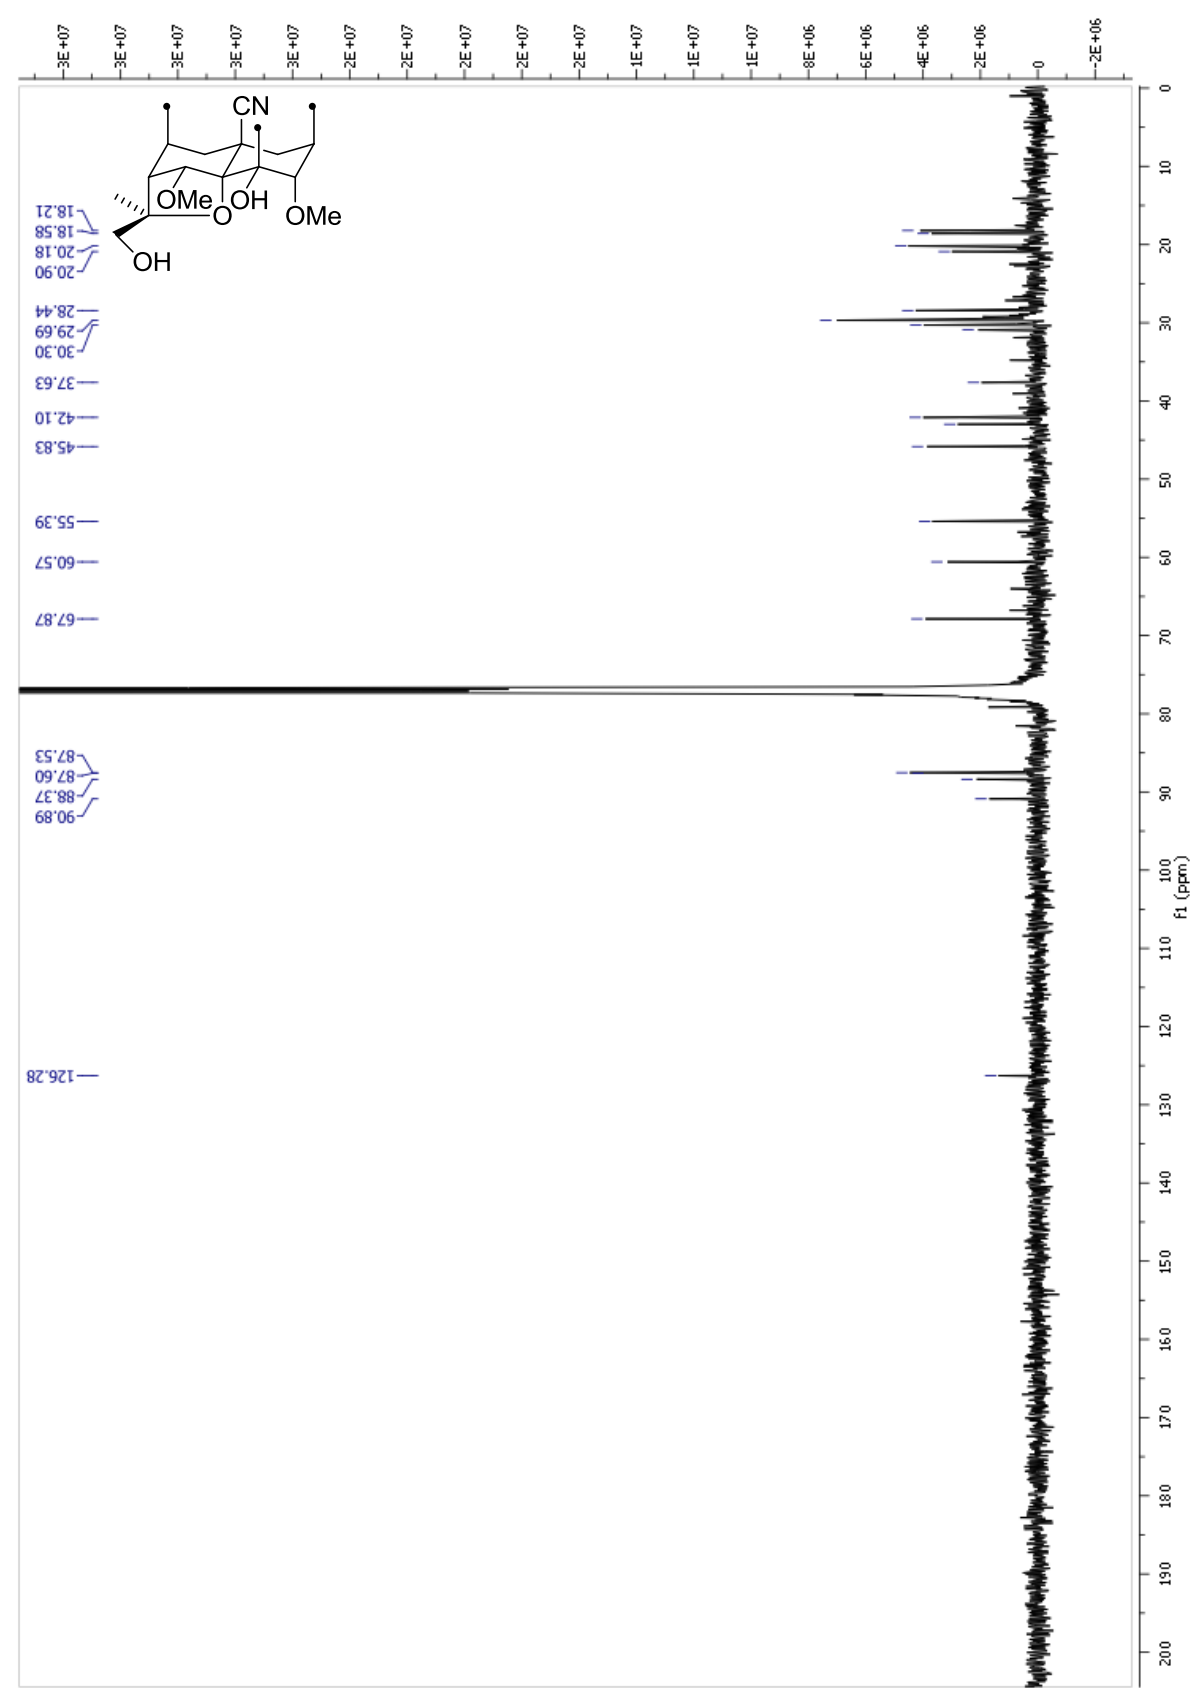



Diol 4 - - COSY (500 MHz)

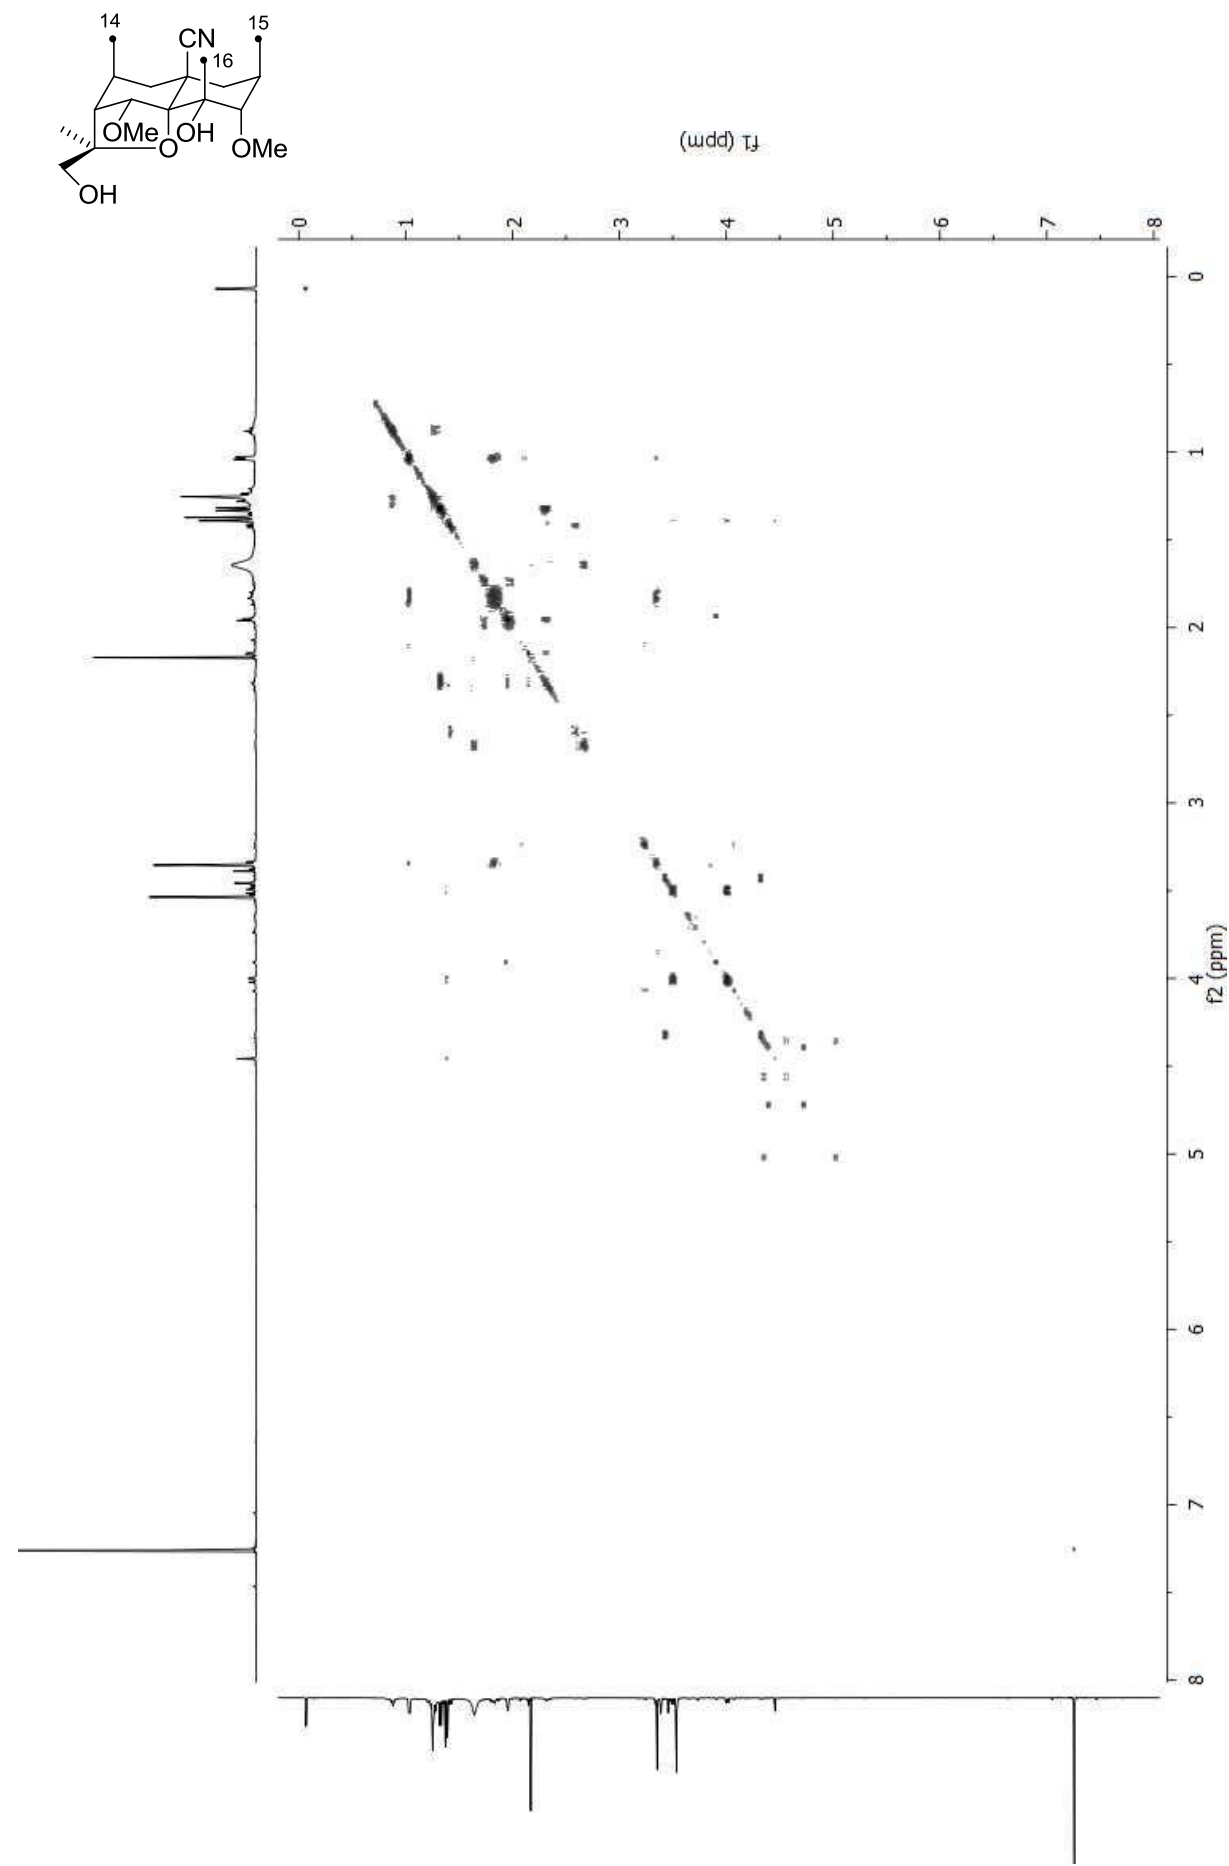

Diol 4 - HSQC (500 MHz)

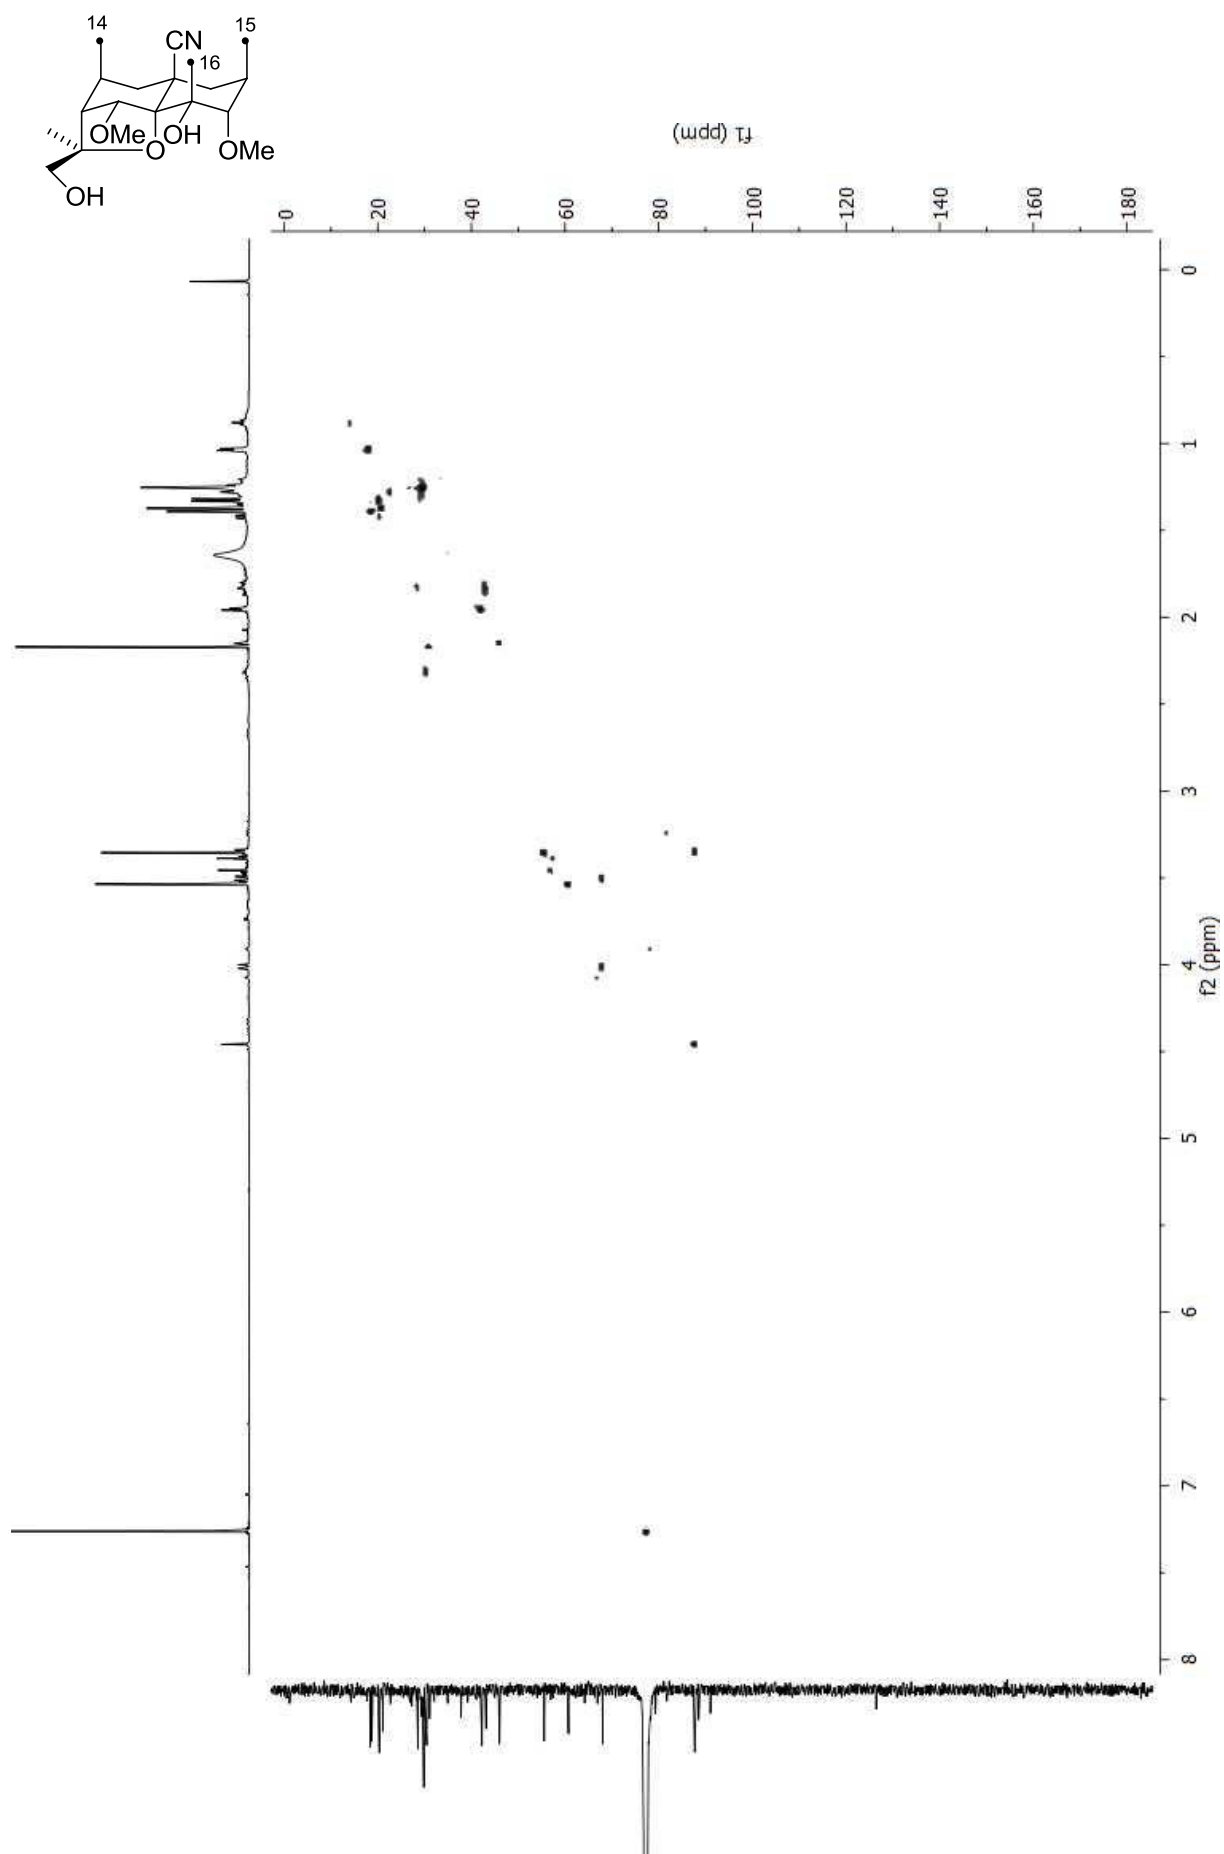

Supplement: c3ob27187k.pdf [file c3ob27187k.pdf]
